# Supplementary material for: N 2 O changes from the Last Glacial Maximum to the preindustrial – Part 2: terrestrial N 2 O emissions and carbon–nitrogen cycle interactions
Source: Copernicus journal article supplement (doi:10.5194/bg-17-3511-2020), 2020-07-08
Supplement: Supplementary file 1 [file bg-17-3511-2020-supplement.zip]

Archive with 3 entries (3 files):
- data_fig3.csv
- data_fig7.csv
- bg-17-3511-2020-supplement-title-page.pdf
