# Supplementary material for: N 2 O changes from the Last Glacial Maximum to the preindustrial – Part 2: terrestrial N 2 O emissions and carbon–nitrogen cycle interactions
Source: Copernicus journal article supplement (doi:10.5194/bg-17-3511-2020), 2020-07-08
Supplement: Supplementary file 1 [file bg-17-3511-2020-supplement.zip › bg-17-3511-2020-supplement-title-page.pdf]

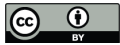

## *Supplement of*

# **N<sub>2</sub>O changes from the Last Glacial Maximum to the preindustrial – Part 2: terrestrial N<sub>2</sub>O emissions and carbon–nitrogen cycle interactions**

**Fortunat Joos et al.**

*Correspondence to:* Fortunat Joos ([joos@climate.unibe.ch](mailto:joos@climate.unibe.ch))

- [bg-17-3511-2020-supplement-title-page.pdf](#)
- [data\\_fig3.csv](#)
- [data\\_fig7.csv](#)

The copyright of individual parts of the supplement might differ from the CC BY 4.0 License.
