# Supplementary material for: N 2 O changes from the Last Glacial Maximum to the preindustrial – Part 2: terrestrial N 2 O emissions and carbon–nitrogen cycle interactions
Source: Copernicus journal article supplement (doi:10.5194/bg-17-3511-2020), 2020-07-08
Supplement: Supplementary file 1 [file bg-17-3511-2020-supplement.zip › data_fig3.csv]

time (kyr BP)	Ice record	Ice record standard deviation	LPX-Bern	LPX-Bern const. BNF
21.0			0.0	0.0
20.999	0.000223252575721553	0.00019265368028738	-0.0015432760107074728	-0.0005547998084689532
20.998			-0.0024990886584088656	-0.0008321177333123764
20.997			-0.0014983895599982588	-0.00035602847233540125
20.996			0.0003064448412066767	0.00042159978989930735
20.995			0.0017624817761978662	0.0009346983230242856
20.994			0.0013797654309080087	0.0003200608379660963
20.993			0.0015430508071432314	0.00039573038379714376
20.992			0.0014819941658075209	0.0002368838060182732
20.991			0.0004421819560853635	-0.0006460236611833814
20.99			-0.0024872340727792874	-0.0020919702027935028
20.989	0.00129987966403895	0.00115918968659059	-0.0031315975001353635	-0.0023143789741948417
20.988			-0.0016906605547530873	-0.002242527987821763
20.987			0.00024103846433476406	-0.0023465746966995216
20.986			-0.0012660204186420998	-0.0031564971685675847
20.985			-0.0031414335628081602	-0.004126663045609158
20.984			-0.003136367579102739	-0.004325858149481165
20.983			-0.0007093079406024216	-0.004047293340556646
20.982			0.0028308155265595047	-0.0029666231430307555
20.981			0.003962558605318911	-0.003048438642341278
20.98			0.002426492906004718	-0.0038182504027250985
20.979	0.00231167662245755	0.00213191309453961	0.002237255682526751	-0.004514466802943984
20.978			0.0021937640824756244	-0.00461517074585216
20.977			0.002090224735700197	-0.0042258964963481915
20.976			0.0033584878194039547	-0.0037871257308763617
20.975			0.0029071979604395892	-0.0041627846844940475
20.974			0.0017263525169646243	-0.004899570655759522
20.973			-9.109617820168836e-05	-0.0057421925692062725
20.972			-0.0024234494874724177	-0.006788436566111944
20.971			-0.0032617024612289214	-0.007965014823122285
20.97			-0.0033355588354853083	-0.00851488544314205
20.969	0.00325579486996858	0.00311167860184988	-0.0040242428400611985	-0.00927341117516467
20.968			-0.005586818694493623	-0.010126047714446473
20.967			-0.0073003523374586266	-0.0115496792136085
20.966			-0.0066778610872963995	-0.011756175842465133
20.965			-0.0035032618673449534	-0.011482926064168009
20.964			-0.002418157841366231	-0.011494497937298398
20.963			-0.0009609239513439505	-0.011739148690240508
20.962			-0.003512157667891813	-0.01279494579627194
20.961			-0.001732190300507419	-0.012183797724701018
20.96			0.0017635150815875633	-0.011360541579083616
20.959	0.00412889429372572	0.00409938292155543	0.0025249974093153327	-0.011200266232407996
20.958			0.00462089964105683	-0.01059927393413096
20.957			0.004527959870955556	-0.010630505368876886
20.956			0.005931819249776815	-0.010247393894427193
20.955			0.005171579811299232	-0.010389434200059222
20.954			0.003763307547743011	-0.011066084099052187
20.953			0.0019605069273742615	-0.011786022995748935
20.952			0.001506699934314959	-0.012103632354954819
20.951			-0.0003491151525345515	-0.012958824508842559
20.95			-0.0001279200146155901	-0.013231751029231464
20.949	0.00492828689644866	0.00509592520615317	0.0007882735497357629	-0.013511589305333471
20.948			0.0009457592538320014	-0.013532690919920043
20.947			0.004189082760047924	-0.012802666332873303
20.946			0.003341299053290392	-0.013497868953623593
20.945			0.003755491109913578	-0.013932054232707713
20.944			0.004686806483237049	-0.013874736526354958
20.943			0.0066377705959626	-0.013639644198809142
20.942			0.007365766811030738	-0.01361062950502645
20.941			0.008669268200057978	-0.013140948224299676
20.94			0.010106712956917896	-0.012557881413741256
20.939	0.00562996882241502	0.00609911239184139	0.009377767473213616	-0.012383140350323174
20.938			0.013238309530747117	-0.011331719380983651
20.937			0.01372589736144203	-0.011407368830104847
20.936			0.014899005151318256	-0.011042851371927176
20.935			0.012667291249337076	-0.012058675236191752
20.934			0.011745963854782993	-0.012972099599493747
20.933			0.01407179835325767	-0.01250851457637947
20.932			0.0156670159231318	-0.011874738234065596
20.931			0.01714521717133355	-0.011378272794199562
20.93			0.01788087620928014	-0.011191469876305149
20.929	0.00622380711995935	0.00710654677003496	0.017370076785100608	-0.01169763061547413
20.928			0.02028828809701455	-0.01105221970042658
20.927			0.019150266960237694	-0.01174657992481798
20.926			0.0181135749277912	-0.012238684631458385
20.925			0.02015683064553553	-0.011912016790927904
20.924			0.02013514750174572	-0.012285261572421602
20.923			0.018638079429255328	-0.013023942445253622
20.922			0.018810917223225587	-0.013413236484244973
20.921			0.020230510084688902	-0.013353993669226183
20.92			0.020564421667901733	-0.013343976940515923
20.919	0.00676363660039061	0.00811748356418648	0.021872533507800718	-0.012914257194986511
20.918			0.02358286386436248	-0.012237590226488848
20.917			0.025548802506206947	-0.011641577927165248
20.916			0.02771448150400868	-0.010802953721478659
20.915			0.029947189156433573	-0.010621525960826439
20.914			0.030553723184108428	-0.01082119694182615
20.913			0.03026382716785836	-0.01091000175251211
20.912			0.028528595438946702	-0.011740206569070377
20.911			0.029204936550826233	-0.012027817952836362
20.91			0.029767974367365113	-0.011817608352664877
20.909	0.00725593709715776	0.00913160424004054	0.029388476232811378	-0.011982760744079224
20.908			0.02886593226096945	-0.012371443834988005
20.907			0.0311480138387914	-0.01178726079117709
20.906			0.031653152979836285	-0.01154882740413754
20.905			0.03212004570025151	-0.011476881924699978
20.904			0.03193813992876393	-0.011194964977260025
20.903			0.03162969080169198	-0.011829520654148329
20.902			0.02926651971347205	-0.012489530985316577
20.901			0.028995034705327605	-0.013000395142570786
20.9			0.02920849864701136	-0.013386670648385168
20.899	0.00770254080858208	0.0101486738599963	0.029578130326350482	-0.01363351909125643
20.898			0.030579697306190035	-0.013667548949309216
20.897			0.0290406749873533	-0.014258279463422063
20.896			0.02949359146740793	-0.014090065809386987
20.895			0.0288030118111946	-0.014501347464283443
20.894			0.02626493198942015	-0.01518723846794745
20.893			0.02626315903730525	-0.015304495000014517
20.892			0.025614755144211188	-0.015531457832248963
20.891			0.025637947357624036	-0.015459145819930908
20.89			0.028046579829253737	-0.01504412935938615
20.889	0.00810463055470488	0.0111684305201385	0.0292092803144266	-0.0142243408664251
20.888			0.031363920959351255	-0.013666458987809493
20.887			0.03059695188294853	-0.014047232308260105
20.886			0.029576327418402215	-0.014814844879280864
20.885			0.02849756806752346	-0.015603435940108712
20.884			0.02804429327575253	-0.017131955160862633
20.883			0.02556370140684283	-0.018541572355173397
20.882			0.027369652731453975	-0.018746852729851327
20.881			0.02615383270555416	-0.019128420593778506
20.88			0.024563761954206065	-0.019791319155211706
20.879	0.00846400725500147	0.0121906093389947	0.023995079348354764	-0.02033836106218767
20.878			0.0227762761396626	-0.021743198149071663
20.877			0.020009581705178192	-0.02349172283567058
20.876			0.020104797648485828	-0.02399755620411681
20.875			0.020792639788469458	-0.024694986937934482
20.874			0.02078331835232916	-0.02542328265713767
20.873			0.021121904974774175	-0.025944151732780307
20.872			0.019620903233392717	-0.026780981627697598
20.871			0.0214926435025653	-0.026336733625691888
20.87			0.022299878069692802	-0.026160124493198822
20.869	0.00878270172344876	0.0132149187845192	0.02033943374633207	-0.02732934623493244
20.868			0.020254992614490597	-0.027833220674039705
20.867			0.02004224589843684	-0.027972852913502377
20.866			0.020889066041463344	-0.028017611092309824
20.865			0.0188738160135129	-0.028898540947164264
20.864			0.01917879668492084	-0.029211171402925062
20.863			0.021946857629025374	-0.028415458519961634
20.862			0.02400570825366266	-0.027950996415742724
20.861			0.02705827691096374	-0.027144074045703626
20.86			0.02931111582607926	-0.026139868937473665
20.859	0.00906274653262131	0.0142410386197828	0.03378591100136141	-0.02433929818001168
20.858			0.034086054498501994	-0.02368962728766144
20.857			0.03349348907486327	-0.023327381739679964
20.856			0.03541419721720107	-0.022595912476951252
20.855			0.035863263384524835	-0.021851913420954494
20.854			0.03793629335398485	-0.021398701457075342
20.853			0.038644066821791334	-0.020633136820883857
20.852			0.040303838359857735	-0.020167547312153422
20.851			0.03994525578234498	-0.020164765425796816
20.85			0.0399663616367798	-0.020136279562382953
20.849	0.00930617596921768	0.0152686204995182	0.04257529446832109	-0.019147805908164228
20.848			0.04325583771773012	-0.018842618531353716
20.847			0.04382866983165812	-0.018819806693144203
20.846			0.044672147552192065	-0.018749201261972104
20.845			0.04098705123972035	-0.01988897213329932
20.844			0.04247604376856895	-0.01970680906458755
20.843			0.04017280453136873	-0.020416282109511297
20.842			0.0397985704016417	-0.02060632566120124
20.841			0.03961192110651446	-0.020701547257479413
20.84			0.03900945968026015	-0.02123699383258737
20.839	0.00951502791909841	0.0162972941701333	0.040954467398027994	-0.021034744015703932
20.838			0.042665671501164404	-0.021011150979023174
20.837			0.04418724928530526	-0.020692102205972507
20.836			0.04437756964931694	-0.02050695319830753
20.835			0.04467160598619113	-0.020486057690252135
20.834			0.04499897145667653	-0.020731610589991956
20.833			0.042995521418007776	-0.021446687673599474
20.832			0.041876450689897204	-0.021988430161497874
20.831			0.04195029222563296	-0.02188986656778935
20.83			0.04490616597783337	-0.021429329162698796
20.829	0.00969132061688391	0.0173266557088109	0.04269076143739703	-0.022158355341434177
20.828			0.04694162142758884	-0.02115904072190289
20.827			0.045667086499077136	-0.02100312559897577
20.826			0.04888681188804256	-0.019868180800515
20.825			0.050830271246002035	-0.019131037511824545
20.824			0.0511266395855321	-0.0191135413847896
20.823			0.05051600590029892	-0.01972024076347778
20.822			0.051308961272214404	-0.02044896075370084
20.821			0.05062199508848941	-0.021322148325293888
20.82			0.0539040766272354	-0.020509880153733784
20.819	0.00983708825537078	0.0183562798654244	0.0517867006020003	-0.02151401394481489
20.818			0.049149587393921834	-0.02244598173772583
20.817			0.04804422965385147	-0.022994350088645366
20.816			0.047016569039850964	-0.02376926435511395
20.815			0.04529468143116677	-0.024655423394912557
20.814			0.0465297138991021	-0.024479359598576833
20.813			0.047940079677137426	-0.02400748940609221
20.812			0.05260348336635268	-0.02263981297821105
20.811			0.05491054681609153	-0.021669924667427898
20.81			0.05763571565732484	-0.020643725507512256
20.809	0.00995438088335012	0.0193857321528181	0.05732119934148194	-0.02068314000841598
20.808			0.05944510598557162	-0.020303445438859757
20.807			0.0586873647244488	-0.020459605217653776
20.806			0.05611346182999899	-0.02124587659207089
20.805			0.0562910417261655	-0.02203016074402675
20.804			0.05710137153857797	-0.02221501971047979
20.803			0.056772668059119624	-0.02218974590010747
20.802			0.057774624618414094	-0.022142323925009366
20.801			0.05977439713010835	-0.02169456002636072
20.8			0.06220440458711529	-0.021161445289240355
20.799	0.0100452500909285	0.0204145557006186	0.05953212917700146	-0.02257236126805129
20.798			0.058746844945122056	-0.023287438153122064
20.797			0.05535655687272012	-0.024845520707117652
20.796			0.055123782858437664	-0.02547917098080621
20.795			0.05563931431764946	-0.026069471200365957
20.794			0.055551121269531656	-0.026595102944600102
20.793			0.057279011382370904	-0.026711709272959405
20.792			0.057751415421618546	-0.026861819907214146
20.791			0.05717467897588158	-0.027378768855099267
20.79			0.05771331403309876	-0.027417231958023258
20.789	0.0101117489977394	0.0214422727226146	0.05782289860459677	-0.02731344120137802
20.788			0.059920300634628276	-0.026950015360152735
20.787			0.06156255014742751	-0.026709052219594742
20.786			0.06323950734433836	-0.02624723338279722
20.785			0.06388969173019632	-0.0260798477342854
20.784			0.06250192070295757	-0.026365522743085235
20.783			0.06249299690204868	-0.02622541419542479
20.782			0.06321332017166181	-0.026177036591234604
20.781			0.06225464762970567	-0.02617604931264439
20.78			0.06277915324651762	-0.025543841151861146
20.779	0.0101559386295699	0.0224683883625488	0.06456705371157057	-0.024820076087929577
20.778			0.06642017100219721	-0.02423410544676141
20.777			0.06509304279006223	-0.024851654140428003
20.776			0.0632973711558602	-0.025705118562828755
20.775			0.0626403179017716	-0.02656115454031549
20.774			0.06289735849129574	-0.02678894988171976
20.773			0.06328568390900102	-0.026515321558673755
20.772			0.06367282722609957	-0.02631462966250009
20.771			0.06502988392061759	-0.0258982109122623
20.77			0.06526812895855993	-0.02579502730553096
20.769	0.0101798270169887	0.0234923673324002	0.06411430560258236	-0.02577640774524803
20.768			0.06627874572875214	-0.025401521910800584
20.767			0.06545639878371023	-0.025846214808763923
20.766			0.06830729204044594	-0.025164983268757712
20.765			0.06806028603143321	-0.02528148182397083
20.764			0.06957758017190141	-0.024730312633669982
20.763			0.07057579566484051	-0.024520300141742224
20.762			0.07039510250591974	-0.024463940001961948
20.761			0.07197330920073597	-0.024021939798207548
20.76			0.07419467726581619	-0.0232762187314286
20.759	0.0101854146860194	0.0245136570731185	0.07333178887807801	-0.0231978434344442
20.758			0.0745970252174768	-0.022556762582699452
20.757			0.07584229655876129	-0.022251019641541525
20.756			0.07748779858087751	-0.02165625121991277
20.755			0.07646090408896011	-0.022028111247835547
20.754			0.07795428150103145	-0.021842455984847575
20.753			0.07720382945485316	-0.02180751367525957
20.752			0.0773803770829149	-0.0214683518382508
20.751			0.07793724503830024	-0.021178450210242783
20.75			0.07781196959765069	-0.021383821013410076
20.749	0.0101747934653548	0.0255317260486166	0.07746613829393656	-0.021668189222176615
20.748			0.0801649353513465	-0.021103296794194426
20.747			0.08222266590388028	-0.02053956761195619
20.746			0.08063703949143974	-0.020945148120059542
20.745			0.07942576654216094	-0.0211793754707561
20.744			0.08070704681296093	-0.020658054812519477
20.743			0.08087379060811806	-0.020658230820408408
20.742			0.08124800197577287	-0.020783679454905224
20.741			0.08063172499906734	-0.02091436052453277
20.74			0.08171794604602489	-0.020330773387752465
20.739	0.0101500567032775	0.0265460297275923	0.08433185921698438	-0.019291847172937526
20.738			0.08316181732741423	-0.019152870383449594
20.737			0.08114628951957137	-0.019398327512865077
20.736			0.0822299583921069	-0.01916528713798682
20.735			0.08263482414043288	-0.01887933213213855
20.734			0.08402740274491194	-0.018423242126905714
20.733			0.08480433078641347	-0.01805580580334909
20.732			0.08569243640023672	-0.017505503787253796
20.731			0.08725002705963458	-0.01706284547855197
20.73			0.08640002134293923	-0.0172778927406958
20.729	0.0101132991273624	0.0275560117662646	0.08753222796206739	-0.017134439501884424
20.728			0.08686996490137044	-0.017419482964387445
20.727			0.08591260911533816	-0.01790297931668494
20.726			0.0858149532912531	-0.018088511332731372
20.725			0.08427136627024989	-0.018582877499547346
20.724			0.08414326835265129	-0.019022529299278057
20.723			0.08224386415104057	-0.019786991723052205
20.722			0.0816930851019464	-0.020089741658894322
20.721			0.08155482498022426	-0.02045869656823096
20.72			0.08369665377653668	-0.020091230448678665
20.719	0.010066561837551	0.028561107663556	0.0845676595154714	-0.019538228163302085
20.718			0.08518334300085062	-0.019425210483645428
20.717			0.08684927965195222	-0.019074076324476552
20.716			0.08605938729074936	-0.019159434970359435
20.715			0.08611920371012172	-0.019260509344902532
20.714			0.08655196782557084	-0.018840363076775946
20.713			0.08521954787409758	-0.0190690665769242
20.712			0.08539197604641746	-0.0191683506019098
20.711			0.08491363939083829	-0.019321975553760584
20.71			0.08390112170159192	-0.020446469842423376
20.709	0.0100123952720679	0.02956069505506	0.08158735310426479	-0.021599333019391764
20.708			0.08086152743675612	-0.022331909413333406
20.707			0.08201148076156617	-0.022665572512372334
20.706			0.07936471676301515	-0.023584653695380542
20.705			0.08020972435748686	-0.02358446111688739
20.704			0.07933993438900089	-0.024207783569284214
20.703			0.07941454815623228	-0.024469891392731036
20.702			0.07961585236934621	-0.024854542146284908
20.701			0.07760085015717344	-0.02573271677090494
20.7			0.07647804078093756	-0.026376884127004008
20.699	0.00995340699612169	0.0305541443871056	0.07654587638448795	-0.026301586571835678
20.698			0.07524138579533712	-0.027122431031462835
20.697			0.0744928139598855	-0.027859779339751034
20.696			0.07160701392182922	-0.028679230867735273
20.695			0.07037038300159182	-0.029048582264877165
20.694			0.06859609508795561	-0.02958752295768896
20.693			0.0682614368179042	-0.02992978535514368
20.692			0.0687668823689842	-0.030213297608058465
20.691			0.06911074860001953	-0.030347210200448504
20.69			0.06681111660183703	-0.03140269229212622
20.689	0.00989139928049995	0.0315408742883426	0.06730832197988335	-0.031258979498175465
20.688			0.06791917782458423	-0.0313453195627007
20.687			0.06910464082152856	-0.03117092864772375
20.686			0.07048958202023314	-0.030925892332067884
20.685			0.07052161527314205	-0.03100373129630163
20.684			0.06971408569036353	-0.03147334538820035
20.683			0.07073504477168502	-0.031161269492304466
20.682			0.07115218650367705	-0.030933705767710595
20.681			0.07232927199106243	-0.03064367551723124
20.68			0.07282112785033412	-0.030370996828808172
20.679	0.00982817492925784	0.0325202979667129	0.07283728777104326	-0.030398262715245483
20.678			0.07269541444067151	-0.030190001331086513
20.677			0.07252645807632341	-0.030616493399610478
20.676			0.06985174958982032	-0.03169287841169832
20.675			0.06689635143426909	-0.03231357401721757
20.674			0.06844161855625153	-0.03219431064605538
20.673			0.06804450267275808	-0.03212869439703714
20.672			0.07048983705026046	-0.03147267659892461
20.671			0.06879094565092991	-0.03191862381806643
20.67			0.06397531620573194	-0.03370513640187878
20.669	0.00976553042691572	0.0334918184287201	0.06325475930679492	-0.033882289024636636
20.668			0.06361439080246445	-0.03382990205557612
20.667			0.06357391964171111	-0.033711695172065514
20.666			0.06466063528053834	-0.03361680012661861
20.665			0.06312584178375591	-0.03467971543485149
20.664			0.06417116586851357	-0.03478969990116587
20.663			0.06587547531719906	-0.0345003351301314
20.662			0.06710156324382321	-0.034415697700279635
20.661			0.06754509136225373	-0.034083252648468454
20.66			0.0694960550519701	-0.03354093259766011
20.659	0.00970536459044928	0.0344548416777174	0.0687065208833646	-0.03360156003156556
20.658			0.06937901627220366	-0.033657218662009436
20.657			0.07010929282647194	-0.03326686568390835
20.656			0.07067084842338556	-0.03298233143881313
20.655			0.07054470977301897	-0.03252951458593767
20.654			0.07038024116684038	-0.03250276184150436
20.653			0.06879635799990602	-0.032757792269846986
20.652			0.07023797269249688	-0.03228150141120323
20.651			0.07152852262332932	-0.031601291161552636
20.65			0.07348083172977393	-0.03025555670422464
20.649	0.00964951491730108	0.0354087709845492	0.0735105352345169	-0.030351655630840524
20.648			0.07187947012503226	-0.030743572178706602
20.647			0.073043731857382	-0.0305653968449473
20.646			0.07251835783762672	-0.03107716212773992
20.645			0.07389605960212808	-0.03069310936499381
20.644			0.07346527777084333	-0.030726127043424256
20.643			0.07313752783970795	-0.030763838942715616
20.642			0.07407421379449541	-0.03046540175207646
20.641			0.0733204162536909	-0.03076978071355385
20.64			0.07521323649141998	-0.03035719577039875
20.639	0.00959975489193013	0.0363529941318695	0.07645132818526079	-0.029891567718463685
20.638			0.07820706654848752	-0.029393165560889445
20.637			0.07750316867788776	-0.029774005155728256
20.636			0.07686549559643652	-0.030363114550657766
20.635			0.07468774209963147	-0.031087552907453464
20.634			0.07496980810322995	-0.031058890537581707
20.633			0.07533300942779597	-0.031174173821612916
20.632			0.07800595803660038	-0.030646656946851758
20.631			0.07972056806248595	-0.03002813551529049
20.63			0.08066134651425383	-0.029888404270515645
20.629	0.00955785962256288	0.0372868984213327	0.0783129605201669	-0.030575763421753388
20.628			0.0759762593236788	-0.03126807067714221
20.627			0.07454738835509644	-0.03177579360547389
20.626			0.06970587743086742	-0.03347489030480966
20.625			0.06858548762767747	-0.03386477213812933
20.624			0.06737319102154071	-0.03446093193069477
20.623			0.0678019602011819	-0.03444927704399392
20.622			0.06720599384547832	-0.034873703101030884
20.621			0.06333755462009005	-0.0363290529137148
20.62			0.06305800291555119	-0.036896115689446285
20.619	0.00952560581641116	0.0382098718066835	0.060627662002111116	-0.03782221404232344
20.618			0.05944344928601364	-0.03792085245780985
20.617			0.061783140845984796	-0.037479809625579286
20.616			0.05946716609687641	-0.038541046840264714
20.615			0.05932913732484835	-0.03873715516046805
20.614			0.061910011921524344	-0.03842152812498356
20.613			0.058585961088027716	-0.03960710444910531
20.612			0.05910358237912661	-0.03968251402710621
20.611			0.06000475157095764	-0.039366480148564253
20.61			0.060753496440975496	-0.03925216345633675
20.609	0.00950477174350425	0.0391213040743077	0.061189915636155945	-0.03922041989448832
20.608			0.06270935681946987	-0.03906296672034659
20.607			0.061902943354573914	-0.03944085529770236
20.606			0.05921308711339801	-0.04069616573715007
20.605			0.055415131713997035	-0.04191505090548686
20.604			0.05413312476156129	-0.042844223575105644
20.603			0.056635235004665496	-0.04226274240809946
20.602			0.05846421151932013	-0.04157191413858041
20.601			0.05863618884494848	-0.04200286825417621
20.6			0.061036848452864945	-0.041244746277019795
20.599	0.00949713720895316	0.040020588079675	0.06245958688850184	-0.04049909700187837
20.598			0.06403092489338391	-0.0407741021792245
20.597			0.06518610185214513	-0.04086086143735046
20.596			0.06426948080051886	-0.04101509531337322
20.595			0.061474453056617584	-0.04202230690383901
20.594			0.06080732225546459	-0.04257609148508057
20.593			0.05856957077172886	-0.04342912808384236
20.592			0.05584095370357822	-0.044722723192599734
20.591			0.05503796731557209	-0.045129162691059044
20.59			0.05745660540738218	-0.04500900182885048
20.589	0.00950448351810513	0.0409071210308614	0.05693878799820151	-0.04530824249355225
20.588			0.05570629224720669	-0.04576955465781518
20.587			0.05586633145600217	-0.04589329346521698
20.586			0.05321545010343964	-0.046739923829706376
20.585			0.05688013269639569	-0.04597962465321581
20.584			0.056970337916247615	-0.04608514204351777
20.583			0.05901043806289685	-0.04572096231811473
20.582			0.05988776132674456	-0.045691572017769744
20.581			0.06256676435824637	-0.04511733626024572
20.58			0.06216856476297217	-0.04535312263442748
20.579	0.00952859344388254	0.0417803058268082	0.06189887143843187	-0.04562021318559095
20.578			0.05879931214938683	-0.04666624672218478
20.577			0.05885546821253129	-0.0472519213946343
20.576			0.059308582856353986	-0.04744821839991675
20.575			0.06080491651475661	-0.04709905708445272
20.574			0.06110707265816373	-0.04694155147084178
20.573			0.057327392899930274	-0.047993858428269975
20.572			0.056549127432113266	-0.04836084758289205
20.571			0.057255150135321564	-0.04837534583080405
20.57			0.05575472583559371	-0.04895410189995575
20.569	0.00957115640561842	0.0426395512076657	0.05491256076392492	-0.04913376740706932
20.568			0.05792332714924786	-0.04856424589975439
20.567			0.05921735704515019	-0.04798624357221293
20.566			0.06035980536090335	-0.04779935351643472
20.565			0.06048963300760768	-0.04780395164500506
20.564			0.0631978235125592	-0.04743232974707068
20.563			0.06395957634063976	-0.04674543835871647
20.562			0.06435316476921571	-0.04647549308041832
20.561			0.06477936103502469	-0.04629259359749982
20.56			0.06478896203714068	-0.046352319682170684
20.559	0.00963485261654785	0.0434842442356656	0.06331994915015482	-0.04666696110265245
20.558			0.062423426609926835	-0.047246903835718834
20.557			0.06167313355757731	-0.047412721606676644
20.556			0.06564908566146066	-0.046164060803651985
20.555			0.0667760145167593	-0.04552620420746534
20.554			0.06929354385728814	-0.044794255535280936
20.553			0.07104812247248926	-0.04409876102530785
20.552			0.07220239074025159	-0.04385094748437668
20.551			0.07074373755479435	-0.044458149690651094
20.55			0.07075519631917881	-0.04440031801751565
20.549	0.00972176950722591	0.0443137980979895	0.07148661826618863	-0.044241406849391485
20.548			0.06904771275813104	-0.04502820837658272
20.547			0.06400036641090967	-0.04734343706051991
20.546			0.062143379341297766	-0.04858165591476138
20.545			0.062459889732072504	-0.048820522786193754
20.544			0.06319084835186572	-0.0488028967349452
20.543			0.06146337416904757	-0.0496920792893758
20.542			0.06053544453732318	-0.05040940362539703
20.541			0.06189180337310862	-0.050485416556520724
20.54			0.061768808393423136	-0.05044163008208602
20.539	0.00983315308160726	0.0451276640213916	0.064356078567406	-0.04990017874769492
20.538			0.06539281378491069	-0.0497221943498829
20.537			0.06459786082798313	-0.050257106971146825
20.536			0.06524469498766283	-0.050165668820724596
20.535			0.06526262530297	-0.0500534338553007
20.534			0.06535384665428978	-0.050179010040578786
20.533			0.06647126174883411	-0.04996049162611027
20.532			0.06669650065192556	-0.0494991038886583
20.531			0.06873306203975549	-0.048431649049503145
20.53			0.06953214751367831	-0.04792780567843602
20.529	0.00996951730606265	0.045925269952336	0.07051747787652474	-0.04752814178715581
20.528			0.07074128410350866	-0.04753727871193458
20.527			0.07043452818892693	-0.04772744974428611
20.526			0.06855705803866918	-0.047806766560110736
20.525			0.0681547132696263	-0.04810689207230712
20.524			0.0673343999371756	-0.04839704942951828
20.523			0.06819509770420407	-0.047977990302874085
20.522			0.06872420416414471	-0.047730028334951324
20.521			0.06849448110358924	-0.0474663516808107
20.52			0.07118064627996645	-0.04680820879679337
20.519	0.0101325865762469	0.0467061023474941	0.07022646444866165	-0.04729233138097211
20.518			0.06822243638247105	-0.047511825583444356
20.517			0.06948964967291893	-0.04736377564047256
20.516			0.06643541484479787	-0.04839221229521251
20.515			0.0652581806021022	-0.04910170179081752
20.514			0.06261796439374656	-0.05019348669726087
20.513			0.062365242731717174	-0.05069263727256912
20.512			0.06323758343143826	-0.05074702839241074
20.511			0.06250525352737224	-0.051081634654389196
20.51			0.0609493861734931	-0.0515143853070994
20.509	0.0103241071655886	0.0474696649792165	0.06051821119739653	-0.05175004068570854
20.508			0.05690955446558643	-0.0533702944413621
20.507			0.05711220104214121	-0.05319623153320374
20.506			0.05995954211461907	-0.05252216647484009
20.505			0.06046308709041348	-0.052123684621344646
20.504			0.060141493486741915	-0.05215084473036913
20.503			0.061854269298044606	-0.05125284780401507
20.502			0.0640861074374417	-0.05058331577014097
20.501			0.06716075866433346	-0.049276542880049234
20.5			0.06509210131481691	-0.049887651925826226
20.499	0.0105458264646902	0.0482154800819875	0.06506789333384777	-0.04998176838667168
20.498			0.06405124774304394	-0.050445661063413416
20.497			0.06303382521311729	-0.050623575248449626
20.496			0.0613484621301712	-0.05102515036211286
20.495			0.06083175842038546	-0.051006623907677406
20.494			0.06328802359722996	-0.050450934058895225
20.493			0.06294278759928051	-0.0501657355815166
20.492			0.06354701403405016	-0.050001319034989056
20.491			0.06438384511567552	-0.049965927183647896
20.49			0.067270324903979	-0.04881352981800435
20.489	0.010799492924016	0.0489430994952309	0.06651367955703869	-0.04874464468455497
20.488			0.06524329882562885	-0.049005649546084884
20.487			0.06580420647030216	-0.04833487348083931
20.486			0.06631637437941773	-0.04805169873926096
20.485			0.06711193180389508	-0.047935305971575026
20.484			0.06610133916717142	-0.04826187614184607
20.483			0.06515396604992851	-0.04854412017107168
20.482			0.06391191402704255	-0.048808138309630156
20.481			0.06300256147354855	-0.048929485780227155
20.48			0.059617810082308154	-0.049707506048696226
20.479	0.0110865032549729	0.0496520833553402	0.05919169507726352	-0.049856106892145924
20.478			0.06217691814583226	-0.04919246615005579
20.477			0.06344764167582895	-0.048956662799397144
20.476			0.06132258697896642	-0.04971312645745107
20.475			0.060244426039470333	-0.05005776474512902
20.474			0.05949097191473918	-0.05024900621182282
20.473			0.06119862193606007	-0.0493583467566161
20.472			0.06319555956596012	-0.04907471895648019
20.471			0.06492496795831926	-0.04869036697948448
20.47			0.0669144583424579	-0.04812569052298099
20.469	0.0114086397169167	0.0503420265704731	0.06836980678140314	-0.04773301234196725
20.468			0.0687218929772131	-0.04785862522869322
20.467			0.06739048143974813	-0.048235443968202674
20.466			0.06649576691076042	-0.048854328089104504
20.465			0.06730148912967504	-0.0487249554213085
20.464			0.06629831444638068	-0.049224191149228824
20.463			0.06425127638185124	-0.04954886980361706
20.462			0.06312937538341945	-0.05016667511003381
20.461			0.06323058111759661	-0.050376177694040125
20.46			0.06216549391392956	-0.05100000275216843
20.459	0.0117677678084418	0.0510125562788607	0.061835692428036104	-0.051270291356025455
20.458			0.06206443965225894	-0.05152605925359621
20.457			0.0628347353478036	-0.051649168111959076
20.456			0.060929685995636085	-0.05214174599527488
20.455			0.060431527946636976	-0.052445346084169175
20.454			0.05756462911292726	-0.05394190791878106
20.453			0.05838235034158057	-0.05395209978982951
20.452			0.05817067907780693	-0.05426791613910731
20.451			0.05994235125238134	-0.05389683205881024
20.45			0.05858028175470764	-0.054300120978769906
20.449	0.0121657538915986	0.0516633289947696	0.05894695493836366	-0.054140631751435686
20.448			0.05668522716037483	-0.054909355282426464
20.447			0.05862009687640324	-0.0551097698223495
20.446			0.057215368424748725	-0.055850939081588
20.445			0.05487867264552371	-0.05667555143093739
20.444			0.052619974052054985	-0.05766232392514459
20.443			0.053159026648264884	-0.05764240874892668
20.442			0.052713276967272016	-0.05816225335910086
20.441			0.052307988263741834	-0.05856942177821001
20.44			0.05021122020299895	-0.05921480279048397
20.439	0.0126043878842251	0.0522940313700317	0.0505189326395028	-0.05957974328318327
20.438			0.050151786924930164	-0.05988794685583687
20.437			0.04864021561434306	-0.06041151319705418
20.436			0.04807842289396014	-0.06039121566394834
20.435			0.048941594548914225	-0.060114904873773245
20.434			0.049599109150087806	-0.060048806993820314
20.433			0.05272351234574035	-0.059184935751791956
20.432			0.051846018416476625	-0.05933141306483636
20.431			0.05124696198302292	-0.05925865309204492
20.43			0.050731161241562184	-0.059486743200388936
20.429	0.0130862257995877	0.0529043778392878	0.04996993843566511	-0.06017512775141043
20.428			0.04913508738744188	-0.06106604437651009
20.427			0.047022537182731305	-0.06218505848202871
20.426			0.04629299575339729	-0.06288155499144787
20.425			0.045739512294328044	-0.06331903789936333
20.424			0.04402511809731724	-0.06368067311407133
20.423			0.04388847081924929	-0.06407035601763322
20.422			0.04381456949084761	-0.06439325096682658
20.421			0.04119387905839744	-0.06507976873501242
20.42			0.04139555310733822	-0.06552159310861327
20.419	0.0136135559151197	0.0534941268514476	0.040210674686105286	-0.06579956281199939
20.418			0.03991145925215278	-0.06588977926751594
20.417			0.04028110236167137	-0.06584989982743017
20.416			0.04202513184482726	-0.06545304419843223
20.415			0.04506034835752448	-0.06460014583868956
20.414			0.04471028703065816	-0.0646096685833335
20.413			0.04614373182416376	-0.06409497453658575
20.412			0.048198046018252505	-0.06382498578318674
20.411			0.04734701806606623	-0.063940778175686
20.41			0.04839611246372222	-0.06392512035430786
20.409	0.0141879084644267	0.0540630775459648	0.04789875646797004	-0.06395521478807265
20.408			0.04570261000739606	-0.0645157357346624
20.407			0.047278425195449	-0.06428818090884492
20.406			0.04642783292632657	-0.06479927742032832
20.405			0.04436976903156964	-0.06538486104153951
20.404			0.046055355597066416	-0.06527132093386867
20.403			0.043697948399552544	-0.06580146856445679
20.402			0.04474390100146408	-0.06612644962358849
20.401			0.04532081740444127	-0.06615223627669753
20.4			0.04424457189647946	-0.06642750550269128
20.399	0.0148108137137212	0.0546110738989613	0.04328890839835875	-0.06707796711117076
20.398			0.04348671325426423	-0.06727428175205441
20.397			0.0443634421754755	-0.06735755891880002
20.396			0.04509411308156697	-0.06724635879423224
20.395			0.043776969017462086	-0.06732523433231918
20.394			0.0449985837540785	-0.06711245004259658
20.393			0.04615927221648608	-0.06683205516475965
20.392			0.04635771375163422	-0.06694156893368164
20.391			0.045219596576738574	-0.0673581660789766
20.39			0.045794436748608724	-0.06702477603569523
20.389	0.0154838054550546	0.0551380084162408	0.04895979404024153	-0.06606133363111377
20.388			0.05038112634141445	-0.06567008887438597
20.387			0.050764655578801055	-0.06565655714538732
20.386			0.05013620124429963	-0.06546865686367043
20.385			0.05047281253258351	-0.06510716420712259
20.384			0.05416223343535531	-0.06376455588429808
20.383			0.05463912438304419	-0.06366668267870002
20.382			0.0568338399747903	-0.06320457804832147
20.381			0.05757303355188714	-0.063015058363048
20.38			0.05766653676706479	-0.06300782136132499
20.379	0.0162082867399067	0.0556438624998383	0.05878027287787546	-0.06261283751640989
20.378			0.060349661989001824	-0.062087649485129015
20.377			0.058948363910973356	-0.06277431828511437
20.376			0.05832489845986899	-0.0632993511656823
20.375			0.05909017559576579	-0.06338935154909553
20.374			0.05896049760523958	-0.06366744852192818
20.373			0.06073456841057645	-0.06341454161132054
20.372			0.062478119026148526	-0.06329374839127722
20.371			0.062382531925513796	-0.06331592216244575
20.37			0.06100159791211457	-0.06400742098104817
20.369	0.0169855539873511	0.0561286281021843	0.06104576823891872	-0.06435680093561347
20.368			0.059800191027536975	-0.06498070646287224
20.367			0.06031195360571395	-0.06457634827331238
20.366			0.06075976822408702	-0.06455160124198289
20.365			0.060679720016667105	-0.06443104207044614
20.364			0.06046061617157772	-0.06438558469847
20.363			0.06494758370404696	-0.06320604319131018
20.362			0.06561837762599776	-0.0628807410225507
20.361			0.06771808026636172	-0.0625983324081052
20.36			0.06779283131526892	-0.06227218211066021
20.359	0.0178173126609545	0.0565923795031212	0.06689142743756982	-0.062468566255754476
20.358			0.06869175311559506	-0.06172022410425204
20.357			0.06985756036188207	-0.061263609707166156
20.356			0.07248056787368551	-0.06072143325760404
20.355			0.07086519861740026	-0.06124643513429873
20.354			0.07061066946234718	-0.06164918865725366
20.353			0.070671070053697	-0.062043949984509794
20.352			0.06835463215179516	-0.06302172241151371
20.351			0.06662385117043534	-0.06373451254530438
20.35			0.06745568059586837	-0.06344458155885535
20.349	0.0187051838968412	0.0570352751592192	0.06839682751881604	-0.06355041578087106
20.348			0.06956464894302705	-0.0636817626255839
20.347			0.07057003214862156	-0.0638939939760943
20.346			0.07110655925583842	-0.0637291144609633
20.345			0.07110793735760357	-0.06399509093514388
20.344			0.07049981266769922	-0.0644926335556546
20.343			0.07116531634558498	-0.06463108704489673
20.342			0.06917578401225999	-0.0650911426967391
20.341			0.06896194928243649	-0.06502740350708325
20.34			0.06896603236627286	-0.064995983107482
20.339	0.0196469613483837	0.0574594740156104	0.06774504909773249	-0.0652919513236132
20.338			0.06666622419113555	-0.06601479512243258
20.337			0.06731548971617762	-0.06601556491100435
20.336			0.06577157456206173	-0.06663311395425309
20.335			0.06708790855967095	-0.06615246425366905
20.334			0.06678428786873258	-0.06581370564741817
20.333			0.06830248969894193	-0.0653944614879034
20.332			0.06998329065589992	-0.06440740793121047
20.331			0.06990186162510614	-0.06464616417596813
20.33			0.0711693997285332	-0.06430674065237962
20.329	0.0206278635771246	0.057872201335464	0.07184342640722186	-0.06388845153870415
20.328			0.07286750623207361	-0.06343322916534477
20.327			0.07358448725063393	-0.06296321345548073
20.326			0.07377175456783469	-0.06315373774074606
20.325			0.07471467003551258	-0.06279331410861722
20.324			0.07584670551923445	-0.062304967558734825
20.323			0.07684381642262217	-0.06204395825970366
20.322			0.07433177152447801	-0.062497686034926
20.321			0.07522092883888831	-0.062189714154246456
20.32			0.07379939357434306	-0.06235757367116679
20.319	0.0216473541129637	0.0582745913932725	0.07322733620680655	-0.06242803713614409
20.318			0.07146410858524366	-0.06268002790976457
20.317			0.07332335673382406	-0.06238644522543746
20.316			0.07610500399520781	-0.06196857984843973
20.315			0.0768454502432645	-0.06175533097583741
20.314			0.07869223908049428	-0.06131007891373441
20.313			0.07629114979297924	-0.062264671235647384
20.312			0.07557804793209932	-0.06232642975406977
20.311			0.07493329128355875	-0.06221685634687657
20.31			0.07520697734699411	-0.06183841276757174
20.309	0.0227058701468251	0.0586671544246479	0.0793147904106295	-0.06044231458082461
20.308			0.07801545395692155	-0.06069239198276666
20.307			0.07771959956913133	-0.06077648584844808
20.306			0.08064334486582236	-0.06031070998538657
20.305			0.07918919464530294	-0.06073339662413746
20.304			0.07959074467367522	-0.06072451026167158
20.303			0.07875537530137322	-0.060892129785690585
20.302			0.07668586359255425	-0.06146865237692278
20.301			0.0774050319527051	-0.06134361399591781
20.3			0.08066800648950423	-0.06024477887188451
20.299	0.0238035083539684	0.0590504168486111	0.08304405567132456	-0.05948719039198802
20.298			0.08353316007868372	-0.05910022642489299
20.297			0.08243074584056931	-0.05955267474304016
20.296			0.08174108038799321	-0.059613745698431586
20.295			0.08330582394017405	-0.05929128740015677
20.294			0.08602647798318941	-0.05871929303774781
20.293			0.0864487432815011	-0.05851122011505616
20.292			0.08629294778249452	-0.058102577611234274
20.291			0.08478949640315392	-0.05800919149903283
20.29			0.08256943681003914	-0.0588413055092718
20.289	0.0249392430069749	0.0594249066450355	0.08028490811755429	-0.059243612016570024
20.288			0.07700417372850765	-0.06037477515624046
20.287			0.0743186925504844	-0.061453615724448074
20.286			0.0720679125761503	-0.06188610987767573
20.285			0.07355737843294641	-0.06149843647793074
20.284			0.07609019723502009	-0.06129238749153432
20.283			0.07585277925694722	-0.061580084252268685
20.282			0.07530752732705714	-0.06184714989372431
20.281			0.0756091093545086	-0.061676704427492623
20.28			0.07707680153340668	-0.06158902520396836
20.279	0.0261139331218653	0.0597910641673516	0.07784094577123035	-0.06161550374928981
20.278			0.07661738151274822	-0.06162143958080879
20.277			0.08112852972366724	-0.06015902645582272
20.276			0.08172432431834142	-0.06041986874048
20.275			0.08140449492774504	-0.06045126151926872
20.274			0.08060738205319762	-0.060627936690969886
20.273			0.07977866505497211	-0.06071287379545032
20.272			0.07863296015018584	-0.061033477833030814
20.271			0.07826599950101354	-0.060982353906168685
20.27			0.07847583659379609	-0.06092937986703717
20.269	0.0273284699029532	0.0601493113422088	0.07915248339746661	-0.0609055702025576
20.268			0.08014515280093981	-0.06073030045219885
20.267			0.07999385439887163	-0.06079355712544543
20.266			0.08073904085592787	-0.06072371511094432
20.265			0.07905904423706467	-0.061269068507096236
20.264			0.07654613291259516	-0.061989233724467185
20.263			0.07462837231852415	-0.06252894369853146
20.262			0.07457710785774907	-0.06276829682711926
20.261			0.07851748420898286	-0.061581210994001045
20.26			0.07963263301846446	-0.060932434341025354
20.259	0.0285837447821571	0.0605000533147921	0.08211125578626799	-0.0599080960642262
20.258			0.0828062182182494	-0.05951584092220075
20.257			0.08635335036464387	-0.05858115515135798
20.256			0.08624124471110228	-0.058332355767636956
20.255			0.0852203547852346	-0.058796069763947134
20.254			0.08649441243849232	-0.058439259271725774
20.253			0.0872595084389749	-0.05786393902778508
20.252			0.08460622155144915	-0.05824144985550017
20.251			0.08294908466305273	-0.05893535979886644
20.25			0.08372401316428757	-0.05837119467552232
20.249	0.0298806494787243	0.0608436788893363	0.0838355767385961	-0.05819121015496265
20.248			0.08314948379975373	-0.05820777843494107
20.247			0.0827004199887389	-0.058624554054299116
20.246			0.08347725626155356	-0.05840223070907724
20.245			0.0854267671301292	-0.057791112483075
20.244			0.08366930376016324	-0.05833928144172229
20.243			0.08236677245409929	-0.059107836826526094
20.242			0.08096416095605807	-0.05969896184162282
20.241			0.07957400925946434	-0.060168626455652685
20.24			0.07955622739570067	-0.060188211583547035
20.239	0.0312200760590671	0.0611805611093479	0.07917461174119023	-0.06038622016139228
20.238			0.07948945989297762	-0.0605466354473585
20.237			0.07997006794609351	-0.060762980324417626
20.236			0.08168808746292733	-0.06087684948040595
20.235			0.083661471041105	-0.06062279285023009
20.234			0.08380656291770805	-0.0603791191839842
20.233			0.08485936685828843	-0.060282492823069855
20.232			0.08435106835983497	-0.060144030804558435
20.231			0.0842919529787638	-0.060261729960818355
20.23			0.08269194598726326	-0.060578120810454106
20.229	0.0326029358071207	0.0615110612977944	0.08123903832143409	-0.061261262351364865
20.228			0.0808591971194188	-0.06166583937289727
20.227			0.07833290538953186	-0.062402168475074404
20.226			0.07784860084254852	-0.06289587141370157
20.225			0.0764806428235536	-0.06347442490131772
20.224			0.07767841459146396	-0.06328721973680507
20.223			0.07750381146319096	-0.0633264627060659
20.222			0.07482511507178824	-0.06404472351790136
20.221			0.07766210104108495	-0.06354498084720528
20.22			0.07755999823274973	-0.06433539242158437
20.219	0.0340299224769933	0.061835565381095	0.07585325511833219	-0.06566949737145422
20.218			0.0738781038857903	-0.06672500712728935
20.217			0.07243089817260984	-0.06720232730235409
20.216			0.07296047161262997	-0.0671528078042063
20.215			0.07296997535468464	-0.06706792941907391
20.214			0.07351790639940425	-0.06709043986006868
20.213			0.07321694579854476	-0.06738176403077589
20.212			0.07468957561496925	-0.06731730859578078
20.211			0.0737564009120506	-0.06800097648143155
20.21			0.07268552498449576	-0.06846002095923565
20.209	0.0355019038670748	0.0621544125333473	0.07360100628395294	-0.06878490414631777
20.208			0.07102883985279895	-0.0698344015764325
20.207			0.0729339543065679	-0.06951438275096922
20.206			0.07540973246222382	-0.06923134463232894
20.205			0.07552889364738569	-0.06917799129848867
20.204			0.07634005558449797	-0.06903793353844034
20.203			0.07724638289772656	-0.06890223175941368
20.202			0.07689955734876541	-0.06929077716832732
20.201			0.07527704904865917	-0.0700069439997204
20.2			0.07426318518965136	-0.0699392104794474
20.199	0.0370198566939074	0.0624679167862721	0.07673625350507418	-0.06903749514340718
20.198			0.07685644928935353	-0.06882160879645727
20.197			0.07653998274650764	-0.06902783096776122
20.196			0.07808651820137058	-0.06813109020371799
20.195			0.08063477906860506	-0.06689781433940722
20.194			0.0824495242401948	-0.06600208485609782
20.193			0.08299321379095748	-0.06622582872768268
20.192			0.0829396489459624	-0.06654639045900601
20.191			0.08353700870014524	-0.06695305037892818
20.19			0.08126137820210655	-0.06792958709729979
20.189	0.0385847585026605	0.062776380429641	0.07694389348346853	-0.06990668973293612
20.188			0.07665795873283354	-0.07042602881968363
20.187			0.07599342895754901	-0.07114301317770044
20.186			0.07537153772609617	-0.07187338368895024
20.185			0.0769608749547519	-0.07184657981596887
20.184			0.07651790380652912	-0.07214607703382359
20.183			0.07753998523099082	-0.07218487203038104
20.182			0.07610215139512277	-0.07283201757619806
20.181			0.07741400542813359	-0.07271264513476328
20.18			0.07755153828154437	-0.07251203454245814
20.179	0.0401975531710896	0.063080094512348	0.07694484945907032	-0.07258510297084375
20.178			0.0755751636961044	-0.07330765627413172
20.177			0.074655919010576	-0.07388284877319307
20.176			0.07549676967442043	-0.0742331679175412
20.175			0.07626188592921856	-0.07440266250794547
20.174			0.07848792685908368	-0.07392558923921433
20.173			0.07699718038947889	-0.07423990066577213
20.172			0.07632231298751435	-0.07417886740654644
20.171			0.07743424693957213	-0.07379234734853313
20.17			0.07809639924034517	-0.07357741632963344
20.169	0.0418594446989265	0.0633793582666467	0.08021875399442902	-0.07292547039025465
20.168			0.08135016259567962	-0.07252208519686709
20.167			0.08136487092930089	-0.07240754835162377
20.166			0.07970999658536293	-0.0731095482036801
20.165			0.079658585991492	-0.07339336397928986
20.164			0.08157685798592862	-0.07263947549289163
20.163			0.08283472145928084	-0.07209257684804427
20.162			0.08205256133468453	-0.07231936240702352
20.161			0.0814134691295072	-0.07285652596047032
20.16			0.08015193474666837	-0.07290881145761308
20.159	0.0435716897665574	0.0636744632859432	0.08034484590846347	-0.07260985489232996
20.158			0.07800076806297973	-0.0730807604653525
20.157			0.07878762004477391	-0.07290573371784048
20.156			0.07777481523753504	-0.073443784277061
20.155			0.07752007268391026	-0.073703890579629
20.154			0.07921232505101106	-0.07325764420320224
20.153			0.0783480405387218	-0.07358125047867947
20.152			0.080406247819508	-0.07300936805032476
20.151			0.08348458340820741	-0.07270560174682528
20.15			0.08321414854505349	-0.07289683690418847
20.149	0.0453350835240228	0.0639656785075029	0.08174333309221193	-0.0735145475044856
20.148			0.08076950862308685	-0.0739867099213336
20.147			0.0800182670293772	-0.07457393130410117
20.146			0.07946077709570165	-0.07439610855226353
20.145			0.08064565026500503	-0.0743021568700084
20.144			0.07987794684402783	-0.07482827110479451
20.143			0.08193728687539625	-0.07459441729245597
20.142			0.08164746892310326	-0.07442910990754048
20.141			0.08121393533046106	-0.0748069604294872
20.14			0.08326519619014672	-0.07388825505200192
20.139	0.0471504212339827	0.0642532698709447	0.08294716075147957	-0.07421530599695125
20.138			0.08467769227598776	-0.07349719908341545
20.137			0.08787793644634512	-0.07266605335842846
20.136			0.09078518054389395	-0.07189298391862708
20.135			0.08886676684031158	-0.07230055307071881
20.134			0.08864065107586505	-0.07246471480145966
20.133			0.08783054334539386	-0.07272389591510309
20.132			0.09078709071834545	-0.07184968108612311
20.131			0.09320404577843355	-0.07096937923076796
20.13			0.09399457078524254	-0.07026575082565123
20.129	0.0490184990644357	0.0645375022944245	0.09452690724231161	-0.07015381377584462
20.128			0.09562398092825042	-0.07040753855070192
20.127			0.0944027121122879	-0.07073004893957968
20.126			0.09476217550429666	-0.07056643278568275
20.125			0.09554493053738078	-0.07038096872115052
20.124			0.0936726428600334	-0.07135668099421522
20.123			0.09202095873095661	-0.07206555006837556
20.122			0.09293200941744306	-0.07186044174377004
20.121			0.08973300247044236	-0.07323640114896723
20.12			0.08967314093667245	-0.07359125256245602
20.119	0.0509400388933172	0.0648186224526822	0.09046761944634074	-0.07402145888281741
20.118			0.09106276424142568	-0.07406851402189107
20.117			0.0919987667182749	-0.07384144927578418
20.116			0.09377797397492582	-0.07317160342253315
20.115			0.09680338355897522	-0.07255142497053613
20.114			0.09927912505283754	-0.07180526399920018
20.113			0.10156142249974032	-0.07082416541309011
20.112			0.10248590697675652	-0.07042193408771213
20.111			0.10366357039920793	-0.06992648317963068
20.11			0.10429960547317485	-0.06964417518393229
20.109	0.0529172915483376	0.0650968667020737	0.10619001243586101	-0.06920522978907528
20.108			0.10690043996048182	-0.0691352736505555
20.107			0.10804733565562596	-0.06909796923445977
20.106			0.10909420890326427	-0.06902582599903084
20.105			0.1089988114325644	-0.06938893859049489
20.104			0.10926699782821991	-0.06926043348452726
20.103			0.10806684887936235	-0.0698043841304341
20.102			0.10791576624056631	-0.0703894035996051
20.101			0.1073825002904929	-0.07101880722600828
20.1			0.106495306649939	-0.07126778757000185
20.099	0.0549510543755284	0.065372512206327	0.10949946331099536	-0.070513380593622
20.098			0.11035999842780075	-0.0700232768715825
20.097			0.11394850440612103	-0.06876194939939717
20.096			0.11659320098761583	-0.06796375523899134
20.095			0.11388611842739405	-0.0686611026755286
20.094			0.11553884697075478	-0.0683561386432252
20.093			0.11451705623148367	-0.06877056155639094
20.092			0.11309977704934493	-0.0694506065608751
20.091			0.11312734735302143	-0.06976790164185842
20.09			0.11116480025438591	-0.0700166699742999
20.089	0.0570415999349364	0.0656458403192444	0.10997479512647157	-0.07026836240248024
20.088			0.11064542048451464	-0.07046950689612319
20.087			0.11270914063518145	-0.06973693731756048
20.086			0.11475121454539394	-0.06910908458668819
20.085			0.1161383963074929	-0.06842409378858649
20.084			0.11491209873593888	-0.06887264308504015
20.083			0.11840513342685366	-0.06827663585069321
20.082			0.12049454028781525	-0.06763433610793657
20.081			0.12053458994818467	-0.06767545388885932
20.08			0.12136129217187541	-0.06746401134714253
20.079	0.0591892006308957	0.0659171420926217	0.12161559334474248	-0.0674316348610784
20.078			0.12201212061845723	-0.06685528685601638
20.077			0.12108414971620629	-0.06686790239169604
20.076			0.12441705629488808	-0.06552959886431453
20.075			0.1252791094660166	-0.06487646725297913
20.074			0.12490269665580911	-0.06503383187919609
20.073			0.12638994245892654	-0.0649073570565617
20.072			0.12559374228691755	-0.06563128649363836
20.071			0.12473059187190128	-0.06588906547725926
20.07			0.12489104541936147	-0.0658187471961531
20.069	0.0613941369353877	0.0661867235354804	0.12545478393612264	-0.06560757948536144
20.068			0.12565925835512015	-0.06547589557134548
20.067			0.12395374642035861	-0.06604470821501285
20.066			0.1223490270638683	-0.06656307758319313
20.065			0.1251090229937155	-0.0662274079445151
20.064			0.12463520518813898	-0.06645526630213161
20.063			0.12411661916861316	-0.06672542695583861
20.062			0.12416150349978672	-0.0669034071704886
20.061			0.12332575229048004	-0.06716965479169135
20.06			0.12338136942787159	-0.06717618477175691
20.059	0.0636566954522057	0.0664548649327308	0.12250229177495342	-0.06752161243150301
20.058			0.12493780630713047	-0.06621322357452697
20.057			0.12470780092779066	-0.06569939455576024
20.056			0.1264682802882584	-0.06498530774723066
20.055			0.1283945369995072	-0.06446192734897171
20.054			0.12881198266045413	-0.06446292178252455
20.053			0.12820674494634599	-0.06463350744125096
20.052			0.1276146201765842	-0.06501108942115152
20.051			0.12348799365457808	-0.06647427153669572
20.05			0.12103718904693839	-0.06741130612466772
20.049	0.0659771460083523	0.0667218838268534	0.12014688011575814	-0.06787138059187159
20.048			0.11826940186896717	-0.06868027551648215
20.047			0.11878583759084016	-0.06877118077663757
20.046			0.11922421560797947	-0.06892877294395006
20.045			0.12179251776991684	-0.0686808324021364
20.044			0.12012928195097672	-0.069051800180842
20.043			0.12125232513821871	-0.0690595464027568
20.042			0.11971449417556634	-0.06910360255531378
20.041			0.1216178568314259	-0.06816867091861867
20.04			0.12392046190143802	-0.06710653922797194
20.039	0.068355783583788	0.0669881539123249	0.12505787856328698	-0.06651273482765907
20.038			0.12363892709170443	-0.06695432979985427
20.037			0.12405336532319211	-0.06661547431754955
20.036			0.12350442180256227	-0.06627511719265988
20.035			0.12374191542879842	-0.06576761463360858
20.034			0.12214049753263367	-0.06618688645409221
20.033			0.12304958861096349	-0.0658023305502049
20.032			0.12522431814873958	-0.06500895102737725
20.031			0.1245851542049099	-0.06508652850669594
20.03			0.1256667250160559	-0.06479958735996472
20.029	0.0707929030121584	0.0672540720275708	0.12715724391388683	-0.06483813375132641
20.028			0.1261432907079474	-0.06536319779427169
20.027			0.125520654184049	-0.06583791343962919
20.026			0.12488233227585965	-0.06616712891617427
20.025			0.12364914813717576	-0.06663538826378956
20.024			0.12382252452094988	-0.06693070491701181
20.023			0.12211461658172507	-0.06775616350129332
20.022			0.12344037248866613	-0.06807950567519572
20.021			0.12154904991091264	-0.06897797903389202
20.02			0.12109647640771914	-0.06969387619557899
20.019	0.0732887949585621	0.0675200658746986	0.12201012328661243	-0.06963739246095679
20.018			0.12241048423447154	-0.06981777980227788
20.017			0.12257418245330332	-0.06993804564478934
20.016			0.12098842767822582	-0.07061575332703085
20.015			0.12214732036963039	-0.07081696270256943
20.014			0.12199526196868593	-0.07061587392115554
20.013			0.12522106302497615	-0.06971958624897856
20.012			0.1264158844185479	-0.06926079415810005
20.011			0.12628706468137274	-0.06956989352971554
20.01			0.12681048510461768	-0.06957347281457693
20.009	0.0758437945798812	0.0677865544917677	0.1254465040100632	-0.0701226027877273
20.008			0.12492900710769383	-0.07077862273222935
20.007			0.12286579041424872	-0.07166831460584677
20.006			0.12263810519494811	-0.07162457575144687
20.005			0.12269122254745568	-0.07160096601792887
20.004			0.12282262486655249	-0.07153241533922938
20.003			0.12250964341736292	-0.0720509167449841
20.002			0.12288862155727642	-0.07222406939180304
20.001			0.12547919211459213	-0.07173838132876442
20.0			0.12482233329315928	-0.07203878752604154
19.999	0.0784582455227646	0.0680540007215077	0.12622399181938082	-0.07193531223845295
19.998			0.12648151456447554	-0.07204281273933621
19.997			0.1238963534496289	-0.07285973743380891
19.996			0.12585508020952219	-0.072204993574152
19.995			0.12824505263814778	-0.07175039079959333
19.994			0.12563318269202917	-0.07249180738705907
19.993			0.125607169078231	-0.07239110508075508
19.992			0.12687633776855556	-0.07124753822371521
19.991			0.13061783920607617	-0.06963865708427885
19.99			0.13363635146238373	-0.06792054953107796
19.989	0.0811339032612611	0.0683229961226158	0.13715432731935273	-0.06627034898302231
19.988			0.13616788025213822	-0.06556847692534506
19.987			0.13439790072231173	-0.06581575212447865
19.986			0.1340066574192882	-0.06598399433142776
19.985			0.1348392190454044	-0.06518914834439782
19.984			0.13503219078949158	-0.06538548215825357
19.983			0.13492762355775767	-0.065511126195259
19.982			0.13249989878814894	-0.06604818439665583
19.981			0.13183677676088212	-0.06635711432939506
19.98			0.1313285923420029	-0.06717126027425757
19.979	0.0838707297607853	0.0685941241607659	0.12878849487171085	-0.06841367273397725
19.978			0.12866435300294388	-0.06858341666010048
19.977			0.13121477693945138	-0.06796580337813118
19.976			0.13306690523140752	-0.06758152114344473
19.975			0.1381418867702724	-0.06605577142952823
19.974			0.14013893498389596	-0.06587714207988471
19.973			0.13934690874636324	-0.06621397400107121
19.972			0.1409483168864032	-0.06592320332936863
19.971			0.1419043715200825	-0.06539186178889356
19.97			0.14253015973737337	-0.0651550678049515
19.969	0.0866685263554147	0.0688680023017433	0.14433947944921677	-0.06492875259780395
19.968			0.1451787836855729	-0.06439449866631164
19.967			0.1468250256973871	-0.06371449160322706
19.966			0.14882291367638345	-0.06314414960022696
19.965			0.14600181127787604	-0.06379879997558491
19.964			0.14607322956253554	-0.0633927782204613
19.963			0.14521670617185922	-0.06378049893435289
19.962			0.14736349429410556	-0.06342573185715406
19.961			0.14580590915154268	-0.06417489946008215
19.96			0.14535098425742365	-0.06436629397279159
19.959	0.0895263015502951	0.0691451793171005	0.14516761894962205	-0.0648044172028166
19.958			0.1438822216078961	-0.06525337711441348
19.957			0.14119146210078704	-0.06595506446648236
19.956			0.14161595825360607	-0.06585601803516483
19.955			0.14410467053268228	-0.06484572198238814
19.954			0.1461042427787822	-0.06397275130334323
19.953			0.1459959138992959	-0.06391487737438295
19.952			0.1478720359566692	-0.06342371809992398
19.951			0.14868919601051456	-0.06314423532980995
19.95			0.14921938992370354	-0.06311517797091337
19.949	0.0924206200316495	0.0694266935518409	0.14746127828839395	-0.06368983382537907
19.948			0.1459608520589626	-0.06408941970008808
19.947			0.1459665724382484	-0.06448768738042765
19.946			0.1464811116308562	-0.06457758161116778
19.945			0.14669919420997246	-0.06464833493819033
19.944			0.14510042351510766	-0.06506992619605789
19.943			0.14502121731309803	-0.06491421577592926
19.942			0.1439534518126102	-0.0650115145213157
19.941			0.14258169756577743	-0.06589871758012333
19.94			0.1422047980532204	-0.06630536495208261
19.939	0.0953184585826141	0.0697133220461612	0.1447548797571594	-0.06581685057930775
19.938			0.14401107909410626	-0.06666281354160208
19.937			0.14373323566886942	-0.0669480916655687
19.936			0.14352940392939662	-0.06721392317875896
19.935			0.1435842521465771	-0.06726440310429482
19.934			0.1444146247411382	-0.06713751666251189
19.933			0.14363187517243503	-0.06715726968879698
19.932			0.1448570504574036	-0.0671843176087854
19.931			0.14703142772396838	-0.06616464650710285
19.93			0.14729198713256775	-0.06604344210409341
19.929	0.098215701710072	0.0700050456856508	0.14843459040046802	-0.0659707276571122
19.928			0.14788403619599677	-0.06618124265505365
19.927			0.1488564801628991	-0.06594757436392995
19.926			0.14690091680366102	-0.06649171659461972
19.925			0.14620380298463953	-0.06675895106605267
19.924			0.14430390276159422	-0.06711907756119317
19.923			0.14347464883379768	-0.06735957796437453
19.922			0.14451863963626543	-0.06721724825370456
19.921			0.14578256550946023	-0.0669999400987642
19.92			0.14530993870371223	-0.06725887542935594
19.919	0.101108527382087	0.0703017808037202	0.14571152632980766	-0.0671191816716803
19.918			0.148591139088472	-0.06662934109880858
19.917			0.14892540491045203	-0.06627867365799767
19.916			0.15022420174581175	-0.06554363583131129
19.915			0.15297905873999795	-0.06509181315986767
19.914			0.15252798711184568	-0.06493585476748875
19.913			0.1544038713167648	-0.06427123647746869
19.912			0.1544548390138969	-0.06399191973058094
19.911			0.15469720647086316	-0.06414686598950126
19.91			0.15564311866334268	-0.06388836450825441
19.909	0.103992930863564	0.0706033799861653	0.15318131476889185	-0.0643795033033503
19.908			0.1529205876513675	-0.06400315377859322
19.907			0.15481837203486304	-0.06316770131699179
19.906			0.1578554485636774	-0.06195604216330919
19.905			0.15970144682873322	-0.06147655008579922
19.904			0.15983704595967652	-0.06146734123845188
19.903			0.15924049990305456	-0.06158287104706628
19.902			0.16057128818789312	-0.06130907218200954
19.901			0.16015080547549232	-0.06089732547360982
19.9			0.1578346083559028	-0.0611190433290274
19.899	0.106864764006291	0.070909630317154	0.15944541372672294	-0.0600893039831043
19.898			0.16237688873753164	-0.058591292779892834
19.897			0.1640858105531562	-0.056877439788936
19.896			0.16577946575739944	-0.055914070793635195
19.895			0.1659806718177821	-0.05577537444722158
19.894			0.16295480512606897	-0.056503414819911946
19.893			0.1627971481575745	-0.056438588056526795
19.892			0.16291326018045726	-0.05646347959237663
19.891			0.16113122525284318	-0.05673232854796928
19.89			0.16052333430829613	-0.056686912986379845
19.889	0.109720313552963	0.0712202889345648	0.16087395084831702	-0.05628282826264597
19.888			0.16088457835281478	-0.05651678229200763
19.887			0.1587256082471198	-0.05748069022486835
19.886			0.15935258183204404	-0.05757265239176235
19.885			0.16044062428493433	-0.05727876116139008
19.884			0.15919702986321216	-0.05792192804485086
19.883			0.1569980323606064	-0.059582585825598944
19.882			0.15210652142780656	-0.061514193330513
19.881			0.1533952252476949	-0.06123351918498132
19.88			0.1526919161707525	-0.06133436983563301
19.879	0.112555866786984	0.0715350711363302	0.15172071267320497	-0.06166141105197909
19.878			0.15180099626275734	-0.06199932913698225
19.877			0.15170823147560597	-0.06242208287020379
19.876			0.15150281426078127	-0.062399260606835094
19.875			0.15249871919568303	-0.061992925871710014
19.874			0.15147067483746213	-0.06204429549908941
19.873			0.15122160639129412	-0.06235754340838917
19.872			0.15224706734405835	-0.06223339445211118
19.871			0.15285964251438244	-0.062403638356976154
19.87			0.15380177399169614	-0.062375246589917
19.869	0.115367666937195	0.0718536497956505	0.1537486025526098	-0.062326735227062
19.868			0.15364942445452368	-0.06245271637770844
19.867			0.1567725685734791	-0.06175440005528121
19.866			0.1562403876129519	-0.06182740262770414
19.865			0.15817910822265624	-0.06143120642052158
19.864			0.1575319471576595	-0.06112353714515972
19.863			0.15804100102178165	-0.06100318272341254
19.862			0.15617504501701873	-0.061360587413205714
19.861			0.15832814465812817	-0.06096206932775239
19.86			0.15902707855874176	-0.061051598958461684
19.859	0.118152555071601	0.0721755542611326	0.15858944416110266	-0.06130838584960285
19.858			0.15742055964489055	-0.061937103773087365
19.857			0.15548142581486246	-0.0626930735210598
19.856			0.154436307122503	-0.06328588523441359
19.855			0.15595280546400492	-0.06316214395364383
19.854			0.1561914617821447	-0.06280905211172727
19.853			0.15662132761859038	-0.06275809945690258
19.852			0.15498596492089511	-0.0635821231588527
19.851			0.15544661854486197	-0.06388159799017834
19.85			0.1575638779783457	-0.0634868082783362
19.849	0.120906889354596	0.07250038819638879	0.15797909543787902	-0.06341332805309063
19.848			0.16094325245363272	-0.06295389732376933
19.847			0.15965310386102782	-0.06374012811629415
19.846			0.1596224816027858	-0.06402643955585252
19.845			0.15843376584092894	-0.06477922433282202
19.844			0.15956736440497732	-0.06453240797036996
19.843			0.16150741228142973	-0.06400360732641919
19.842			0.16372112904103187	-0.06278574322813113
19.841			0.1665560937609607	-0.0620004205397946
19.84			0.16613967865771428	-0.06194595157861249
19.839	0.123626737293411	0.0728277749157135	0.16503620071417036	-0.061762638167120354
19.838			0.16539627582798477	-0.06151435972446828
19.837			0.16888005051635524	-0.06035604850523346
19.836			0.16924812378285292	-0.06015181323304897
19.835			0.16798637410071127	-0.06021772229054978
19.834			0.1672274960205815	-0.06051387644069495
19.833			0.16587569696067028	-0.060950430268915
19.832			0.167969749203146	-0.06017961366517022
19.831			0.16775566093731165	-0.05976897778724255
19.83			0.16790037304317718	-0.05950106301636415
19.829	0.126308011210844	0.0731573148687696	0.17019126088915204	-0.05864867072739699
19.828			0.16980085764228026	-0.05903142123189986
19.827			0.16933542859094697	-0.05878170299091234
19.826			0.16943523771428826	-0.05870740655366391
19.825			0.16893269191855786	-0.058396611047948355
19.824			0.16641176834337568	-0.05876632977835072
19.823			0.16770981894345027	-0.05832065532187314
19.822			0.1688304885244447	-0.05815386567552072
19.821			0.17064173259911009	-0.05757233983546062
19.82			0.17076592748982744	-0.057640605979440984
19.819	0.128948119367504	0.0734887953772237	0.1684388271320607	-0.05842589927644837
19.818			0.16859298805364809	-0.05848158667532166
19.817			0.16869207036712197	-0.058113451672688
19.816			0.1687514879604315	-0.057884394073282275
19.815			0.17056736866601607	-0.05706986276738335
19.814			0.17107406957529125	-0.05639274681621664
19.813			0.17243576478741574	-0.056075938597145436
19.812			0.17371337588235303	-0.05543984951730385
19.811			0.17513001671560424	-0.05483012811982291
19.81			0.1729337093285679	-0.05531243528916696
19.809	0.131568138871613	0.0738243675272155	0.17453874617115073	-0.05487465051581242
19.808			0.17538249711049314	-0.054446405920369756
19.807			0.1783345915468475	-0.05304452044540664
19.806			0.177944648547939	-0.05307988857585899
19.805			0.17928162572545236	-0.05296024619540152
19.804			0.17942913668002713	-0.052880657671489084
19.803			0.1790745794485069	-0.052659927168326126
19.802			0.1764918949740819	-0.053534406905711096
19.801			0.17591222100501902	-0.05421495525724507
19.8			0.17466588154589324	-0.05460873746836148
19.799	0.134186952265796	0.0741657688780122	0.17317075402892979	-0.05524144346025128
19.798			0.17103127984243827	-0.055898411732659525
19.797			0.17165912793906202	-0.05541156882135656
19.796			0.17092930820360142	-0.05507917228216419
19.795			0.17125879506562214	-0.054906633026080565
19.794			0.17196934131241814	-0.054290158313693215
19.793			0.1718392450559918	-0.05404536319194975
19.792			0.17122566684634943	-0.05406425110590263
19.791			0.17176775208338224	-0.0534361710319482
19.79			0.17352740210196327	-0.05249326495521989
19.789	0.136803752912002	0.074512703404926	0.1738010370601124	-0.05196177173657279
19.788			0.174845407363172	-0.051355062259298645
19.787			0.17456436683518906	-0.05104483153081274
19.786			0.17474147977505972	-0.05087267426542197
19.785			0.17109496734288054	-0.05174215960162876
19.784			0.17035595824961547	-0.052021287975359654
19.783			0.17001403773754653	-0.0523669666131259
19.782			0.1665115505673116	-0.05298682048539183
19.781			0.1681184974843024	-0.05263934779406898
19.78			0.16823198126518957	-0.05229262749141217
19.779	0.139418069592289	0.0748648449976648	0.16881066059202343	-0.05200578366057984
19.778			0.16841927170090898	-0.05242167416681487
19.777			0.1688980200820671	-0.05241927715585781
19.776			0.1699759206427558	-0.05213223959101665
19.775			0.16932501446908788	-0.05245653464453759
19.774			0.1669582327066097	-0.0532842333751653
19.773			0.16930682648677298	-0.05311792595437259
19.772			0.17111966914459753	-0.05228110720309509
19.771			0.16790510690840765	-0.0528271556781883
19.77			0.16619587428584293	-0.05325401235223737
19.769	0.142029823074541	0.0752218636487492	0.16799554112609183	-0.05233700077416392
19.768			0.16751162827534927	-0.052099276084609514
19.767			0.1658478302351556	-0.05231707508912797
19.766			0.16425775884674287	-0.053041291353396636
19.765			0.16403093353782072	-0.05329027253855201
19.764			0.15993598873374015	-0.05454651455281434
19.763			0.15918725830139113	-0.05500025175226342
19.762			0.15963140171326717	-0.05475747675736797
19.761			0.1581607121731876	-0.05480623384573069
19.76			0.15651711046248717	-0.05506771803561161
19.759	0.144637846571177	0.0755833258430355	0.15636521654041946	-0.05513034653001814
19.758			0.15569425162945194	-0.05518442295649617
19.757			0.15621551919600485	-0.05490926032915855
19.756			0.15562659012851476	-0.05512101808336922
19.755			0.15626394083089234	-0.05468260914520773
19.754			0.15938724193317988	-0.0532550553076343
19.753			0.15832390338189484	-0.05287401414005344
19.752			0.16044824102420918	-0.05203017749189964
19.751			0.1597885846935041	-0.05173293127786249
19.75			0.15877045831642	-0.05201100921069246
19.749	0.147240966810567	0.0759487543084084	0.15702102174720345	-0.0523972575480518
19.748			0.154418508738833	-0.05315590731146713
19.747			0.15387053459420486	-0.0531056612010814
19.746			0.15268423685206844	-0.053680232328780164
19.745			0.15142837994202996	-0.05446003130788113
19.744			0.15239052503018424	-0.05443557301841584
19.743			0.1495375892149271	-0.05521457140313224
19.742			0.1497563179232646	-0.05501217725333496
19.741			0.15278412474820247	-0.054599974966395015
19.74			0.15593984450137555	-0.053621442651758056
19.739	0.14983800863791	0.0763176326320549	0.15773304609438643	-0.05265500979183946
19.738			0.16082396719800585	-0.0512552672295552
19.737			0.15913729326718684	-0.051567268895037044
19.736			0.16092788501686606	-0.051269263732419024
19.735			0.16249522566203733	-0.05028481331611978
19.734			0.16463683601823842	-0.04874646144214423
19.733			0.16258418888360548	-0.04858980211994823
19.732			0.1624918442118508	-0.04832105879899928
19.731			0.16284494754900614	-0.047515367916536544
19.73			0.16418879061949188	-0.04707635662037668
19.729	0.152427795023175	0.0766894097855055	0.16303860752034272	-0.047631972022367464
19.728			0.16262678736593017	-0.04781649634737506
19.727			0.1621464809344415	-0.04823780063178118
19.726			0.16263043411091083	-0.048044876827729954
19.725			0.1624774379319609	-0.0481402865391003
19.724			0.1595800252082098	-0.04904351806832419
19.723			0.15868556861192484	-0.04953834206785124
19.722			0.1587365868696864	-0.04978914882658181
19.721			0.1570469822211864	-0.05035404900035423
19.72			0.15507266131571829	-0.05095814557929379
19.719	0.155009217316411	0.0770635254880825	0.1564954829431473	-0.05085888041163966
19.718			0.15462521796916473	-0.05118143465468594
19.717			0.15413135497099706	-0.05104437131993733
19.716			0.15448195852049373	-0.050774923570886976
19.715			0.15300450708959001	-0.05075120477394979
19.714			0.15528339506259048	-0.049984010756797925
19.713			0.15469360173670488	-0.04989063100618463
19.712			0.154602133608714	-0.049747204250771615
19.711			0.1529614321237167	-0.050092732488340674
19.71			0.1540022408392625	-0.04990586985391254
19.709	0.157582249354247	0.0774394329381302	0.15397226714458778	-0.05008845733300227
19.708			0.15246705524345572	-0.05039892983011107
19.707			0.15203539437862812	-0.05026749413729292
19.706			0.1523437460029191	-0.050147821575895035
19.705			0.1524932431143755	-0.049950960776820486
19.704			0.151948213927942	-0.050025253699983896
19.703			0.1499605189734723	-0.05070317905154065
19.702			0.14783998940626564	-0.051462075167641785
19.701			0.1441464843863427	-0.052618979504156504
19.7			0.14316966866161351	-0.05295996773655465
19.699	0.160146432441561	0.07781666276273	0.14257167187278785	-0.05285968984627387
19.698			0.14406212592036205	-0.05268866913609371
19.697			0.14374641559059143	-0.05289352535927794
19.696			0.14321687642949055	-0.05304970521376262
19.695			0.14167795264531247	-0.05361567471742612
19.694			0.14129571749135827	-0.05402228206653059
19.693			0.1409994657720297	-0.05396626356141199
19.692			0.13873941883534968	-0.05427909186716762
19.691			0.14075224056664748	-0.05338304139080963
19.69			0.14509999876463997	-0.05089347705698977
19.689	0.162700089156463	0.0781945895250641	0.14602664644890062	-0.04995695062237515
19.688			0.14880802571572183	-0.048402548047717486
19.687			0.14812967977191693	-0.04754873325815012
19.686			0.1510701356434403	-0.04619717394570966
19.685			0.15233312893630746	-0.045588800732372814
19.684			0.15102599449208132	-0.04616899502704297
19.683			0.15113545906564863	-0.0461125177054611
19.682			0.15147109033085382	-0.04599600361375522
19.681			0.1510031913925225	-0.04633016191984374
19.68			0.14886292054876815	-0.04764787504276824
19.679	0.16524112737772	0.0785725335926239	0.1478881475770102	-0.04841740060747601
19.678			0.1470315592278526	-0.0490277388660838
19.677			0.1454149807576357	-0.049371090320751376
19.676			0.14374246166304516	-0.05057541439448676
19.675			0.14395068590707094	-0.050597974511934485
19.674			0.14220413255302056	-0.05121419835504781
19.673			0.1416235056542563	-0.05174352878091315
19.672			0.14371423484307488	-0.05056823424778156
19.671			0.14375860535612972	-0.05017840831919895
19.67			0.14589749975896105	-0.04928837303253952
19.669	0.167767410891828	0.0789498110084895	0.15034748556180677	-0.047945337479415207
19.668			0.1516330385525606	-0.046962952039288686
19.667			0.15302320133379155	-0.046202145101427616
19.666			0.15221232189933165	-0.04623985593912794
19.665			0.1522157152510708	-0.046481729396083526
19.664			0.1527928910188292	-0.0467567974268186
19.663			0.14716980730785156	-0.04859367519690383
19.662			0.14308690191026052	-0.0495945989384412
19.661			0.14270265707292307	-0.04976329454568362
19.66			0.13998767674939394	-0.05002417890148192
19.659	0.170277150081165	0.0793257932128185	0.14170158736473404	-0.049705538072918554
19.658			0.14016752241594865	-0.05026478016853386
19.657			0.1394765870671124	-0.05027803984515278
19.656			0.13729584305575226	-0.050637420656087784
19.655			0.13734341999988953	-0.05042233804977614
19.654			0.13520545265057393	-0.051218596827793395
19.653			0.13533402108660386	-0.051821193095682005
19.652			0.13608907057245379	-0.051663423237900075
19.651			0.13771069149593096	-0.05110513835596642
19.65			0.1381563683863023	-0.0509817821954448
19.649	0.172769035309036	0.0796998659452218	0.14128129108426712	-0.05004258407093953
19.648			0.14316664213449037	-0.04909173688650781
19.647			0.14448876135015354	-0.048436072994628265
19.646			0.14557927043196095	-0.04786245745130002
19.645			0.14605896788029238	-0.04738391525765606
19.644			0.14678356626285805	-0.04702592857248855
19.643			0.14515469239405654	-0.04766375100725284
19.642			0.14207902273586903	-0.04839101559786485
19.641			0.14303780459422288	-0.048268586985400486
19.64			0.14235640090838597	-0.04816159065389325
19.639	0.175240569021526	0.0800713754736757	0.14333518134497858	-0.0481069219660919
19.638			0.14150307449736577	-0.04860695356017097
19.637			0.1411056557459629	-0.04885130090406564
19.636			0.14193245297355706	-0.04896431161818682
19.635			0.14136940614407933	-0.048954572686512154
19.634			0.14259700895482563	-0.04853705441149092
19.633			0.14145038596688675	-0.04871495854756347
19.632			0.14252919275847553	-0.048411394563010246
19.631			0.14270608958173892	-0.04812284554136825
19.63			0.14457077267379592	-0.04774762126446608
19.629	0.177689469603865	0.0804400220039578	0.14700549547614727	-0.04690185905467659
19.628			0.14622407094615308	-0.046945642507433716
19.627			0.14380422641448387	-0.047348196667969855
19.626			0.1438570147847571	-0.04731641335906933
19.625			0.14387980527787114	-0.04721752510570054
19.624			0.14355518812245105	-0.0471990931361963
19.623			0.14406170959489017	-0.04698746424395672
19.622			0.14287720444025442	-0.04726740083727221
19.621			0.1424826447376928	-0.04736979663691043
19.62			0.13839863075884473	-0.04813545707403466
19.619	0.180112326710722	0.0808053309079522	0.13570906824280726	-0.0490896098123248
19.618			0.13442267903422422	-0.049397868733675576
19.617			0.13573266709215392	-0.04884261208314844
19.616			0.1389453176900508	-0.047517148486941885
19.615			0.13928645376932192	-0.04710132709621839
19.614			0.14230010734777476	-0.04588678919027034
19.613			0.14154062239229326	-0.04546527409055634
19.612			0.14214296260636416	-0.0449154917686454
19.611			0.1422686168288143	-0.04485977406581099
19.61			0.14349456379899195	-0.04445852129126848
19.609	0.182507192577302	0.0811667641572328	0.1416392341511754	-0.044919583754909675
19.608			0.14078955123789338	-0.0454712631673162
19.607			0.14146603726709106	-0.04529698636186352
19.606			0.1409308875642017	-0.045074624140594155
19.605			0.1406191536236534	-0.04489880807511226
19.604			0.14010257207906918	-0.045306346643466666
19.603			0.13949086496628293	-0.045132056227164874
19.602			0.13928080925437847	-0.045147289341158414
19.601			0.13693111033159422	-0.045561255791044086
19.6			0.13471704368149062	-0.04633396262452538
19.599	0.184872147237854	0.0815238164072941	0.1349458124295424	-0.046375840631541765
19.598			0.13755901411310933	-0.04560778772188501
19.597			0.13803877419194688	-0.04535456834691565
19.596			0.13994026341938248	-0.044663850644908853
19.595			0.13913666411421222	-0.04492967095988898
19.594			0.13583973515013525	-0.045975043475619426
19.593			0.1329158116958169	-0.0468034886237787
19.592			0.13202217011615947	-0.046692445564221474
19.591			0.1326875022821037	-0.046510871277804844
19.59			0.1329040392358367	-0.04631587074877119
19.589	0.187205261403127	0.0818760179992545	0.13508592067568959	-0.046151655220904475
19.588			0.13549001558016815	-0.04646838046757762
19.587			0.1332522450258704	-0.04753965870075061
19.586			0.1306649860045992	-0.04892445895094211
19.585			0.1286699662408104	-0.050725767842035197
19.584			0.1268397137844559	-0.05175598654910596
19.583			0.12751653109247574	-0.05171723652344484
19.582			0.12822913139221015	-0.05161433573687546
19.581			0.13015548154232537	-0.051730582712322004
19.58			0.12924208306615803	-0.05181535253469716
19.579	0.189504695107391	0.0822229846231244	0.1309309294426333	-0.0516020391109393
19.578			0.13267069918008279	-0.051120553671933244
19.577			0.1329338380848606	-0.051333428052773966
19.576			0.13169469077350193	-0.051625937885969364
19.575			0.13202356268366344	-0.051574867270649305
19.574			0.13142427944177637	-0.051996680691263064
19.573			0.13189320124178305	-0.05219802556214903
19.572			0.1332061369233326	-0.051783921493625096
19.571			0.13434267764608343	-0.05099676161856914
19.57			0.1360716191832987	-0.050350551887781814
19.569	0.191770298505267	0.0825650671286476	0.13357274823744358	-0.05123379195401001
19.568			0.13425095076741744	-0.0510692887250177
19.567			0.1365252202909577	-0.050486594640936744
19.566			0.13817814840253728	-0.04992828823096285
19.565			0.1404603594499223	-0.049492168810118864
19.564			0.14009566891867298	-0.04981865659789286
19.563			0.13986809759026197	-0.05013423073638967
19.562			0.1411437815693546	-0.04999647932683171
19.561			0.14078220537906194	-0.050045014961684675
19.56			0.13888987391263985	-0.05043711184107491
19.559	0.194006345213747	0.0829043280222767	0.13920964724990448	-0.050345288206914196
19.558			0.13786925582120269	-0.050364812180396124
19.557			0.1391550378681643	-0.050046686192594114
19.556			0.13968096375967942	-0.049604860565990005
19.555			0.14013112436570907	-0.04834249081214592
19.554			0.14260932366711465	-0.04719565895264788
19.553			0.1425536832202301	-0.04705183509606159
19.552			0.14285381105434514	-0.04734931191167968
19.551			0.14077710595349213	-0.04813642785516303
19.55			0.1412874481916706	-0.048109647079969564
19.549	0.196208438866093	0.0832412228447512	0.14310050724207013	-0.047170810700355226
19.548			0.1436010687397582	-0.04685858139918242
19.547			0.14518072797618586	-0.04656903179911609
19.546			0.14566236303319613	-0.04619662023188553
19.545			0.14734051679278348	-0.045815539829769714
19.544			0.14775786305676242	-0.045610460776234873
19.543			0.14755013095449154	-0.04580017805021175
19.542			0.14748424701254503	-0.046084276854646555
19.541			0.14754631656466177	-0.04643939687449983
19.54			0.14771879127396392	-0.04628319193428676
19.539	0.198355233865581	0.0835736780900118	0.14696707302823686	-0.04634174622750775
19.538			0.14792196061048557	-0.04630108665746846
19.537			0.1484277771903475	-0.0461602211189005
19.536			0.1481047806936342	-0.04606575420175507
19.535			0.14888027379897828	-0.04583535054628918
19.534			0.1505058852159964	-0.04570977302986323
19.533			0.15084057566798936	-0.0456076266764196
19.532			0.15066572135732859	-0.04583384312155592
19.531			0.1485112452436148	-0.046325106731381016
19.53			0.14433020939144292	-0.047821461813564614
19.529	0.200447940274169	0.0839016699612911	0.14369388725085752	-0.047993038760496765
19.528			0.14161549125835027	-0.048800205914579786
19.527			0.14255165587416485	-0.048956131861745966
19.526			0.14135892795123706	-0.049457943199757715
19.525			0.13940576678030236	-0.0504537663450062
19.524			0.14096160936793556	-0.05019189554267145
19.523			0.1422169218299585	-0.05005059922233834
19.522			0.1426936158156238	-0.04988588489629353
19.521			0.14427782766577213	-0.04945001001236138
19.52			0.1438690737274806	-0.04950972693088529
19.519	0.202488345307256	0.0842252192001348	0.1426150145783689	-0.04996649200080161
19.518			0.14153972829564498	-0.05045268909489886
19.517			0.14091862005005495	-0.050852021852320295
19.516			0.14073705909889433	-0.05109562611169127
19.515			0.14157053545247322	-0.05142245953020552
19.514			0.14000891238319202	-0.052179516246753765
19.513			0.13784307889324232	-0.05322717424803769
19.512			0.1390546394145149	-0.05329166581595324
19.511			0.13759238250965833	-0.05390786695636374
19.51			0.13558327132823322	-0.054477607142124684
19.509	0.204478112329152	0.0845443424936577	0.13515540660217873	-0.05470270923771481
19.508			0.13420286420641503	-0.05488431241084801
19.507			0.13513278744211732	-0.05471501846428595
19.506			0.13660564351589866	-0.05471167295137991
19.505			0.13844015697310041	-0.054827420828522655
19.504			0.13943480337041247	-0.05443874490921119
19.503			0.13882986070570258	-0.054670288184788696
19.502			0.1397159997123305	-0.05499055684294918
19.501			0.13969901769938087	-0.05458480270557664
19.5			0.13933212753221813	-0.05467284421397478
19.499	0.206419910259424	0.0848592470728553	0.13735654663402386	-0.05538457493699456
19.498			0.1406387246982428	-0.05489353609042369
19.497			0.14101170475620162	-0.05439170441244179
19.496			0.14139456462311006	-0.054295666304219115
19.495			0.13913140272981028	-0.05534812381731058
19.494			0.14064670906031562	-0.05469180072664126
19.493			0.13956990966613958	-0.054428753800047636
19.492			0.14028386708802376	-0.05433624678551241
19.491			0.13951006026023194	-0.0546909031782532
19.49			0.14134399851349322	-0.05395994993420983
19.489	0.208316593015878	0.0851701106333948	0.14132093344847885	-0.0538857577740135
19.488			0.1406408302190627	-0.0540199593499231
19.487			0.14184192887416813	-0.053462179944276045
19.486			0.14196841310497899	-0.053333810327252706
19.485			0.14028529722550864	-0.054236883488884446
19.484			0.1393330131954249	-0.054827097025035965
19.483			0.139502704471818	-0.0551095508090198
19.482			0.13767899185144294	-0.055742083314145985
19.481			0.13913698223014848	-0.05547319740415624
19.48			0.13911094174896554	-0.055523015278602816
19.479	0.210169264045701	0.0854769183081298	0.14015972827930767	-0.05535443540434781
19.478			0.1390953884418833	-0.05562219579700001
19.477			0.1395783883900581	-0.055869956612852434
19.476			0.13866130740995786	-0.05621657479999387
19.475			0.13688846521353337	-0.05711089359603605
19.474			0.13566850830447486	-0.05739221292232033
19.473			0.13822543640713914	-0.057100700995129205
19.472			0.13603718148995192	-0.05755250105308152
19.471			0.13578213848987897	-0.05774605140517153
19.47			0.1373808498614233	-0.05745510016627753
19.469	0.211979028193599	0.0857796505848399	0.1369294815598927	-0.057529507648932166
19.468			0.13766428241790774	-0.057567246007676154
19.467			0.137909145531653	-0.057525175870655865
19.466			0.13911639089858863	-0.05711687982722746
19.465			0.13793264350732404	-0.05747161613224838
19.464			0.13547827947665336	-0.058160280865633185
19.463			0.13474149309314942	-0.0582451526003398
19.462			0.13581169240257385	-0.058000026761293455
19.461			0.1327423426670844	-0.058569648302005284
19.46			0.1311505017319119	-0.0592602519255665
19.459	0.21374699430789	0.0860782826906806	0.1322557267388591	-0.05913317678771346
19.458			0.13323379252119416	-0.05925923290190882
19.457			0.1299103303263287	-0.06080628433814805
19.456			0.13114411671511217	-0.06109328943955816
19.455			0.13259534558261699	-0.060801200049307225
19.454			0.13397564993526867	-0.06077193686305615
19.453			0.13400858741093646	-0.06072202843968766
19.452			0.13673771852066086	-0.06021448585814437
19.451			0.13788206540293935	-0.06019324935235848
19.45			0.13667965955211336	-0.060562278941997505
19.449	0.215474272382071	0.0863728206905041	0.1369053815257626	-0.06084903977206113
19.448			0.13719659871033052	-0.06086197503583035
19.447			0.13631303257740512	-0.06129003472609207
19.446			0.13459845400387405	-0.06222190930297011
19.445			0.13324850432487967	-0.06264393110661914
19.444			0.1349873788056115	-0.06234554705533246
19.443			0.13454271256952754	-0.06253328972654604
19.442			0.13283759827706554	-0.06343028008435803
19.441			0.13296730843481086	-0.06365995174267014
19.44			0.13240240660974223	-0.06416301377778866
19.439	0.217162608457837	0.0866634164919866	0.13433686400731837	-0.06396774289226204
19.438			0.13557036778897036	-0.0636885357656154
19.437			0.1361427700714808	-0.06375812927518854
19.436			0.13613150285655173	-0.06379932960931534
19.435			0.1359208223955397	-0.06437459112117794
19.434			0.1355764151069403	-0.06486192407918834
19.433			0.13421717033451142	-0.06516241091445885
19.432			0.13208079781313486	-0.0658094795571762
19.431			0.13230375951119022	-0.06584570999253048
19.43			0.13168352940379702	-0.0663857195291051
19.429	0.218812978761164	0.0869500091185855	0.12919065739711488	-0.06692529958923998
19.428			0.12825164362799857	-0.06743942288127536
19.427			0.12687709159199656	-0.06801380167077653
19.426			0.1249785531242269	-0.06910601222411605
19.425			0.1274670386696526	-0.0682649056014153
19.424			0.12695390907370108	-0.06808178152384148
19.423			0.12862340876605227	-0.06766115044911714
19.422			0.12773565956536448	-0.06872234120046494
19.421			0.12821465657180386	-0.06888402342627775
19.42			0.1295251889887945	-0.06793503277349489
19.419	0.22042626205425	0.0872325099233344	0.12985197537490656	-0.06858195818439383
19.418			0.1309641393958314	-0.06870704284752405
19.417			0.13121147865138827	-0.06856156530652746
19.416			0.13049485901527458	-0.0689194886572504
19.415			0.13023895330561874	-0.06900244707054992
19.414			0.12979587435833295	-0.06931977622046603
19.413			0.12894404466604037	-0.0696604866015107
19.412			0.12990812919378936	-0.06981601011906013
19.411			0.13109010982859637	-0.06914953633306409
19.41			0.13206715794539825	-0.0684501832665605
19.409	0.222003340342701	0.0875108222153147	0.1332484396610143	-0.06796660024323531
19.408			0.1347519173660272	-0.06772878117407366
19.407			0.13553069203979362	-0.067418615805797
19.406			0.13819264193551373	-0.06702878221573871
19.405			0.13787129930355935	-0.06716851897449683
19.404			0.1397788191863345	-0.06664678085355735
19.403			0.14117010935204632	-0.06644870166516559
19.402			0.14120255342604082	-0.06670363870771756
19.401			0.141203832646287	-0.06660906360325458
19.4			0.14324753849395044	-0.0661273269827114
19.399	0.223545090763566	0.0877848457936474	0.1464867300704089	-0.06529581307194676
19.398			0.14503598881277302	-0.06544094856811555
19.397			0.1448514272898649	-0.06516922412639947
19.396			0.1460924980328615	-0.06483513316046396
19.395			0.14530141796654572	-0.06509430354047696
19.394			0.142685731352576	-0.06566344320425421
19.393			0.14486143275759478	-0.0652035376457396
19.392			0.14408124542028933	-0.06539234822706197
19.391			0.1451925991942966	-0.06461896519702615
19.39			0.14599761907176223	-0.06432297848322821
19.389	0.225052433358541	0.0880543911293445	0.14952091250977784	-0.06340355995494962
19.388			0.14942875662412458	-0.06331727311430146
19.387			0.15017380248284784	-0.06320400574652285
19.386			0.14947916718585574	-0.06362858408762406
19.385			0.15017818774465486	-0.06327866958494544
19.384			0.15134223511727107	-0.0627090331790956
19.383			0.15436616137998538	-0.06183014059976033
19.382			0.15382794541963296	-0.062071049014074564
19.381			0.1520156456297297	-0.06287627522311423
19.38			0.15279037202927626	-0.06297519647435212
19.379	0.226526285695245	0.0883192905623815	0.15374511163329618	-0.06323053959055636
19.378			0.14956747170882245	-0.06555613576100616
19.377			0.14908624935427728	-0.06621062662305643
19.376			0.14751640063680593	-0.06732466071710963
19.375			0.1458902250447931	-0.06867992524457711
19.374			0.1445939552072062	-0.0697117376680656
19.373			0.14336835767862777	-0.07071271058178219
19.372			0.14475085853105263	-0.07049898007518718
19.371			0.1445646050014684	-0.0706575150655997
19.37			0.1440507685713257	-0.07086671693949409
19.369	0.227967514011577	0.0885794355736931	0.1437758538948506	-0.07086523625446195
19.368			0.14400691917250885	-0.07085248053277438
19.367			0.1427894375809391	-0.07145466116166643
19.366			0.14179037613438705	-0.07195181656500371
19.365			0.14174522880132479	-0.07276306031579827
19.364			0.14230098705686256	-0.07281595119785167
19.363			0.14248790163226754	-0.0731625053065228
19.362			0.14526076841331736	-0.07277583947715538
19.361			0.14548125561050806	-0.07258775769380699
19.36			0.14359683078944308	-0.07344349598094002
19.359	0.229376987225719	0.0888347097992438	0.1443507903849799	-0.07345132771015428
19.358			0.1423814150232463	-0.07418095795365987
19.357			0.14053695267190047	-0.0750369388223493
19.356			0.14216021011306346	-0.07476124096909431
19.355			0.143307640613755	-0.07430714077926481
19.354			0.14560589667733037	-0.07363540303075622
19.353			0.14625896581676212	-0.07317011787230387
19.352			0.14503906702386082	-0.07296900353081481
19.351			0.14823112821949724	-0.07174392451960343
19.35			0.15255242182855788	-0.07032681721263612
19.349	0.230755580211207	0.0890849918036545	0.1522608913447394	-0.06992317531191938
19.348			0.1544805097769446	-0.0689318902912841
19.347			0.15393350065466826	-0.06870336761819784
19.346			0.1581812683972874	-0.06725646240342797
19.345			0.15940802603882265	-0.06696313027047385
19.344			0.16027749529263957	-0.06691100792924454
19.343			0.15953563246214575	-0.06704623849322222
19.342			0.16060747464875025	-0.066797258265622
19.341			0.15856932080650488	-0.06719564781172971
19.34			0.15742522068431342	-0.06784737849920108
19.339	0.232104148897528	0.0893301312384394	0.15784418186084892	-0.06782535350651053
19.338			0.15998533453408115	-0.06669918518177087
19.337			0.16015227872681947	-0.06596685837082683
19.336			0.16161912301755255	-0.06525965316903282
19.335			0.16204345525806296	-0.0645933282706872
19.334			0.1647056872774897	-0.06339048696107308
19.333			0.16687337989868833	-0.06234329535012817
19.332			0.16694317926362245	-0.06202365030541146
19.331			0.16708726611468006	-0.06178393808445626
19.33			0.16837402611423258	-0.06157748020183784
19.329	0.233423511851532	0.0895699342207204	0.16848370672504043	-0.060908524733345626
19.328			0.16785241160502995	-0.060946980168934406
19.327			0.16772686976166362	-0.06083944104788386
19.326			0.16872446186211398	-0.06036399070764209
19.325			0.170310656949189	-0.059840484424991125
19.324			0.1696279139896344	-0.05959298079655273
19.323			0.17111256970222932	-0.05914582209168584
19.322			0.16808715327349333	-0.05971461555061541
19.321			0.1659749867136231	-0.06040238412631527
19.32			0.16309798026740552	-0.06118762205280137
19.319	0.234714462229277	0.0898042812507214	0.16308781813229523	-0.06160764835050614
19.318			0.16025458868260678	-0.062087021923261876
19.317			0.1611248773410754	-0.06193988539568429
19.316			0.16159636834271485	-0.062106863264286494
19.315			0.1630170878395898	-0.0619617964278929
19.314			0.16165167797782143	-0.06240372046777565
19.313			0.16132496622246073	-0.06265860085313268
19.312			0.16252296667879484	-0.062427065973464924
19.311			0.16290948484686663	-0.062144187869440426
19.31			0.16363725085307568	-0.061916952921123425
19.309	0.235978758904666	0.0900332027272696	0.16376629164247802	-0.062176589772711566
19.308			0.1650708231799527	-0.0621073717199796
19.307			0.1669028081267543	-0.06192343551739943
19.306			0.1673881043176424	-0.06211335700326037
19.305			0.16542813506000442	-0.0627787740770187
19.304			0.162155089126232	-0.0639738262278966
19.303			0.16174974331293246	-0.0642728193240727
19.302			0.15964808532867547	-0.06496061722235957
19.301			0.15805616023292135	-0.06577380977166358
19.3			0.1579112760325838	-0.06615719913550833
19.299	0.237217589754713	0.0902566183435077	0.15718383878640907	-0.06607856514967736
19.298			0.15393403740798295	-0.06703050108244946
19.297			0.15400337314736845	-0.0669815448872988
19.296			0.1561172823234358	-0.06626703565727965
19.295			0.15661931977175492	-0.06601920728007182
19.294			0.15397761613430028	-0.06676048734186546
19.293			0.15645292401884792	-0.06622291228667287
19.292			0.15661374237982617	-0.06621157895542717
19.291			0.15681393765625096	-0.0662936691456757
19.29			0.15814545260515	-0.06579903154074973
19.289	0.238431424713924	0.0904743659916665	0.1587879629652571	-0.06559434445153012
19.288			0.15920417177435464	-0.06550893533331625
19.287			0.15832761001092255	-0.06594296204338868
19.286			0.15613568577473647	-0.06666108405500015
19.285			0.15500272274636817	-0.0666802562444293
19.284			0.15291677923880798	-0.06726225008923414
19.283			0.15121102741355408	-0.06778538681037971
19.282			0.15165578873522279	-0.06806749497577358
19.281			0.15135843853184383	-0.06820890188183082
19.28			0.15274405514857747	-0.06834638392077252
19.279	0.239620734795891	0.0906862764276503	0.15237003495202206	-0.0684182074553148
19.278			0.1535219645529775	-0.06791323795467252
19.277			0.15183417751398043	-0.06807626529664645
19.276			0.15167785625930108	-0.06779461662172581
19.275			0.15188093845972706	-0.06776640522684363
19.274			0.1517743294982914	-0.06759200665698128
19.273			0.15276320222208195	-0.067250125664293
19.272			0.154285030952086	-0.06653492801712457
19.271			0.15353178974648962	-0.06684197482290344
19.27			0.15145044089466353	-0.06732529836946988
19.269	0.240785992165627	0.0908921736495691	0.15075628521847317	-0.06708420095166745
19.268			0.15098915838002203	-0.06698943005475999
19.267			0.15028493838210366	-0.06684554308673984
19.266			0.15069996701823563	-0.0667203261527991
19.265			0.15086129256613923	-0.06623753077730998
19.264			0.15295609992973258	-0.0656006262350457
19.263			0.15352912626285153	-0.06523723677424798
19.262			0.15462416092735243	-0.06410354982642019
19.261			0.1539140223012696	-0.06354470981432181
19.26			0.15345519512092665	-0.06321624673776438
19.259	0.241927670013812	0.0910918753297785	0.15283549288534992	-0.063136441010325
19.258			0.154706231868726	-0.06195435063984789
19.257			0.15803740898082186	-0.060458839193872294
19.256			0.15674942308305706	-0.060700312402993006
19.255			0.15545218724418763	-0.060819156424529286
19.254			0.1554363403697021	-0.06043943545571473
19.253			0.15406515100520402	-0.059895513846940585
19.252			0.15338028075522825	-0.05990980839254423
19.251			0.15136417081745357	-0.060220717194248596
19.25			0.15023153621191376	-0.0603646876758559
19.249	0.243046110662306	0.0912851904442855	0.15091985423331344	-0.06027904369041348
19.248			0.1506510230621858	-0.060379042155739304
19.247			0.14961614774905563	-0.06047700101696707
19.246			0.14903387455693995	-0.060722833019088984
19.245			0.14769734069241025	-0.06121558463510701
19.244			0.14599780473892832	-0.062188895530853605
19.243			0.14199571370147535	-0.06459898858988322
19.242			0.1393798599999272	-0.06561664345446405
19.241			0.1395597701001332	-0.0655759087093668
19.24			0.13913414830147453	-0.06559296073601373
19.239	0.244142585705659	0.0914721569425405	0.13954210620932095	-0.06552072170504952
19.238			0.1383708340662082	-0.06594261026933435
19.237			0.13492024326389807	-0.06717190658435568
19.236			0.13498527445812059	-0.06726062299619939
19.235			0.13278132621158267	-0.06803935418139662
19.234			0.1320444964422096	-0.06857211974242738
19.233			0.1309481006047486	-0.06884085679997187
19.232			0.13254893370350462	-0.0684811853778371
19.231			0.13354904301267645	-0.0677533804160555
19.23			0.13393758893488084	-0.06730502869728072
19.229	0.245218582636846	0.0916527402771097	0.13363829142004136	-0.06666857054978004
19.228			0.13404920271218046	-0.06622351827988937
19.227			0.13311944978014711	-0.06631200927183967
19.226			0.13228376367409922	-0.06640715354029658
19.225			0.13087875761045709	-0.0668716652130219
19.224			0.131361421343688	-0.06689180835816488
19.223			0.1302956627659455	-0.06684275419613117
19.222			0.12908546167662038	-0.06682763934276892
19.221			0.12892098880117953	-0.06693450860428896
19.22			0.12851018284150584	-0.06694308229039114
19.219	0.246273871633556	0.0918267007991026	0.12897967058340676	-0.06685998909216484
19.218			0.12972171903914553	-0.06662946282445059
19.217			0.1293512663316818	-0.06693090557669668
19.216			0.13057403378938837	-0.06672220986589039
19.215			0.12882499164855243	-0.06735367306774953
19.214			0.13015865537931504	-0.0668958594854181
19.213			0.12984406307465246	-0.06666931631943185
19.212			0.12979424779296256	-0.06628203147789224
19.211			0.13176356623846264	-0.06537192541572479
19.21			0.13268792525961182	-0.06525168114544
19.209	0.247308220070161	0.0919937949286039	0.13078397710961998	-0.06544869103059714
19.208			0.12809924896393454	-0.06615586019718522
19.207			0.12720297710168094	-0.06642870751560426
19.206			0.12901420974505573	-0.06612759721484851
19.205			0.127977116170225	-0.06651191858284311
19.204			0.12703856611243314	-0.06675933238630916
19.203			0.12613436102828235	-0.06678773317571074
19.202			0.12660272734312894	-0.06733820292508108
19.201			0.12467431888995595	-0.06812979405442876
19.2			0.12519954856712623	-0.06831638088114134
19.199	0.24832132759667	0.0921537803143955	0.12374335538517212	-0.06872887245812942
19.198			0.12524281095005385	-0.06858811641762141
19.197			0.1269176773977918	-0.06865850121079053
19.196			0.12592976601828187	-0.06916177170655069
19.195			0.12723143467434728	-0.068685591446084
19.194			0.1264685062432509	-0.0687707468603016
19.193			0.1260240650164297	-0.06847305814538829
19.192			0.1275597867806182	-0.06805993519612641
19.191			0.12509351229829413	-0.06880386082487022
19.19			0.12204690588186473	-0.06960921726519964
19.189	0.249313365755518	0.09230646952913	0.1195842869356456	-0.07048943666550955
19.188			0.11995620348989977	-0.07071819737066343
19.187			0.12100505403725048	-0.07033837847436142
19.186			0.1207928251108017	-0.07037861833150871
19.185			0.12120699297116122	-0.07069792596095859
19.184			0.12233819895093401	-0.070454158340574
19.183			0.12239349029573798	-0.07051822290707443
19.182			0.12029635677913042	-0.07154603665163672
19.181			0.11965224888517323	-0.07172748464171619
19.18			0.11783661525800948	-0.07231187926724147
19.179	0.250284368099117	0.0924516365013092	0.11768029776932654	-0.07249534154499515
19.178			0.11844042726408333	-0.07273873555862798
19.177			0.11793398550892586	-0.07306007310667684
19.176			0.11938462235010938	-0.07310810916843669
19.175			0.1175053286045582	-0.07367852200263103
19.174			0.11810805648919853	-0.07372345512278722
19.173			0.11945049571200617	-0.07309273107955949
19.172			0.12109560844237421	-0.07240499584550042
19.171			0.12244507556595075	-0.07184118900643677
19.17			0.12347202448398331	-0.07185896259878022
19.169	0.251233668168228	0.0925890508231331	0.12526911146332953	-0.0712385302297831
19.168			0.12569756528294995	-0.07123794514636761
19.167			0.1236317657111421	-0.07212224622039853
19.166			0.12203229528453097	-0.0726578541875671
19.165			0.12107421809713159	-0.07264791128907166
19.164			0.12063425653035864	-0.0724634867006928
19.163			0.12294406712507744	-0.07162673754376514
19.162			0.12243805632024163	-0.07175164990197858
19.161			0.12281816531051781	-0.07158866689563981
19.16			0.12492790399932563	-0.07138235042302044
19.159	0.252162005537161	0.0927188077546874	0.12474457047451715	-0.07124632899920047
19.158			0.12527880944555925	-0.07166252027875908
19.157			0.12621766737946327	-0.07157293569974055
19.156			0.12377817370748545	-0.07213804333498897
19.155			0.1233512499018321	-0.07254203665294612
19.154			0.12113508874230661	-0.07340637759599145
19.153			0.12279180967827585	-0.0734583339910384
19.152			0.12512770259493866	-0.07308781112619944
19.151			0.12734275742080392	-0.07236867587667195
19.15			0.1261980990242133	-0.07244255668006105
19.149	0.253069013299022	0.0928407178216266	0.12623730152199641	-0.07254249051261974
19.148			0.12778142525306357	-0.07216722441804024
19.147			0.12638075226946732	-0.07241793239151773
19.146			0.12535310583326797	-0.07217309978005249
19.145			0.12606412075018003	-0.07182517038790182
19.144			0.12418288248554976	-0.07230383380915328
19.143			0.12480493993617614	-0.07222299646446761
19.142			0.12366484303628233	-0.07252446160614912
19.141			0.12453891231703462	-0.07232311666029201
19.14			0.12261996959765487	-0.07298428816224756
19.139	0.253953588191744	0.0929544776051359	0.12420682131496452	-0.07253054398599135
19.138			0.12762243192058165	-0.07150606979401619
19.137			0.12981901743147528	-0.07046901988042431
19.136			0.13003054815823134	-0.07001931864100142
19.135			0.13232785958182003	-0.06945465270763385
19.134			0.13321904887609382	-0.06875552615525216
19.133			0.13454995833864558	-0.0687007627979006
19.132			0.13343219566294717	-0.06885569323264384
19.131			0.1329631248310692	-0.06883011515885373
19.13			0.13170867295136635	-0.06934520524566445
19.129	0.254814625792125	0.093059786189098	0.1314000165351512	-0.06964808110629295
19.128			0.13050439655582036	-0.06980712574444836
19.127			0.1299805420235396	-0.07014141165612275
19.126			0.12978703774457045	-0.07019881088964652
19.125			0.13088505959886287	-0.06998860825337294
19.124			0.1321641334928021	-0.06989134450191092
19.123			0.13218945383834502	-0.07004111260706147
19.122			0.1323979921549716	-0.07004942740219189
19.121			0.1331192704826183	-0.07012527967797144
19.12			0.13486424160506516	-0.06977408110531558
19.119	0.25565102792857	0.0931563465595264	0.13678895462168317	-0.06936314304441482
19.118			0.13780689048923112	-0.06882328498810786
19.117			0.1385357512521228	-0.06871918711292868
19.116			0.1395830997258498	-0.06843079028215238
19.115			0.1407545601405964	-0.06808968900821144
19.114			0.14241130981378092	-0.067911287201607
19.113			0.14282607150030735	-0.067774152693441
19.112			0.14421415913311186	-0.06784276261317013
19.111			0.1423163748118803	-0.06865444916630237
19.11			0.14072840770057926	-0.06913704311993785
19.109	0.256461606161513	0.0932437824311935	0.14036844541788263	-0.0698635710856017
19.108			0.1403167004510193	-0.07111051709683402
19.107			0.1399886784349862	-0.07069164144073503
19.106			0.14175024981780204	-0.06963866849058253
19.105			0.14139804764386543	-0.06958673288335215
19.104			0.1423249394495434	-0.069268917388281
19.103			0.14299887525334842	-0.06898198709489334
19.102			0.14337624166267915	-0.06890606688975054
19.101			0.14326209147843194	-0.06887697053172204
19.1			0.14192959060768917	-0.06913357373615203
19.099	0.257244314305796	0.0933216850228769	0.14239616987578074	-0.06943335204321888
19.098			0.1428894628483368	-0.06976448724510931
19.097			0.14502784376447142	-0.06953206606655615
19.096			0.14473782889747255	-0.06971352998540681
19.095			0.143839189631489	-0.06978993804795408
19.094			0.14321617922159646	-0.07004063811789152
19.093			0.14309404623334743	-0.07031113326362304
19.092			0.1411694544150821	-0.07101210823584014
19.091			0.14099589468007867	-0.07128585853636271
19.09			0.1398314790788664	-0.07156943736506505
19.089	0.257998441804131	0.0933897916522798	0.14135270328805927	-0.07169164634271974
19.088			0.13854804619742822	-0.07257755830743018
19.087			0.13672462846097577	-0.0731719725693194
19.086			0.13528345978075773	-0.0736080482003374
19.085			0.13741099780686383	-0.07333044822352841
19.084			0.1374836234980572	-0.0738439849023298
19.083			0.13682498638616902	-0.07414907866554743
19.082			0.13853879811979652	-0.07406668534707794
19.081			0.13694160485950757	-0.0751157219434877
19.08			0.13709499459478014	-0.07504652097529996
19.079	0.258723301408018	0.0934478508958163	0.13605686831815422	-0.07599034340928967
19.078			0.13434119852117377	-0.07651779463815456
19.077			0.13082917500119695	-0.07709050389097927
19.076			0.13260882951076347	-0.07671533959241761
19.075			0.1311059867072517	-0.07704815461555148
19.074			0.13235024135886597	-0.07624259152585733
19.073			0.1329468572478607	-0.07608683907925884
19.072			0.1334858621811481	-0.07609031408298916
19.071			0.13161526170559856	-0.07665978253608574
19.07			0.13413536424956174	-0.07610592403115168
19.069	0.25941820487705	0.0934956230480441	0.13443579837006503	-0.07613843869939907
19.068			0.13250841923127066	-0.07679411487562948
19.067			0.13259757593666865	-0.07692592811760313
19.066			0.1312366473146085	-0.07706155249075652
19.065			0.13142623118539465	-0.07714799042872889
19.064			0.13128877171754993	-0.07720147391181342
19.063			0.13376031008467937	-0.07678053758102443
19.062			0.13326776853462974	-0.07681789818260443
19.061			0.13331042220477496	-0.07676182871431991
19.06			0.13318705658580132	-0.07709245873208848
19.059	0.260082462945557	0.0935328819189522	0.13360460646946315	-0.07688953469740523
19.058			0.13467403339607475	-0.07689554963879464
19.057			0.13546051281555105	-0.07692119426651556
19.056			0.1356901496313263	-0.07711365273738502
19.055			0.13691128199570368	-0.07678251912850365
19.054			0.13691318204340952	-0.07704930250625597
19.053			0.13605398959225212	-0.0777093085539966
19.052			0.134693101338355	-0.07838487684246687
19.051			0.1346150715013783	-0.07848895406274137
19.05			0.13319064357928845	-0.07853892595869283
19.049	0.260715385283635	0.0935594167407311	0.13190623196674345	-0.07912497009572195
19.048			0.13247001916041334	-0.07934206386876697
19.047			0.13197026618476038	-0.07951738190098934
19.046			0.13548597853505928	-0.07856380477424696
19.045			0.13425365165669412	-0.07850864589617568
19.044			0.13499876786389198	-0.0785890193117782
19.043			0.13521717453799997	-0.07884266324794065
19.042			0.1367212170264427	-0.07890294648989893
19.041			0.135727026539878	-0.07939511620373185
19.04			0.13972066658130178	-0.07882637101476275
19.039	0.261316280463856	0.0935750342145062	0.13866464280831892	-0.07921014119137215
19.038			0.1376272201340223	-0.07965146102896314
19.037			0.1381488735391434	-0.07990243403254271
19.036			0.1386683039898724	-0.08042083055350169
19.035			0.1380334667975287	-0.08116313506897699
19.034			0.13371214710309332	-0.082783842652846
19.033			0.1324858922706662	-0.08331344932632745
19.032			0.13244099098069118	-0.0836920388474327
19.031			0.13376075332684412	-0.08361809277746235
19.03			0.1373787196898144	-0.08256625642394577
19.029	0.261884455926459	0.0935795606833749	0.14072586898059747	-0.08132445740312089
19.028			0.14286022311178392	-0.08064383349233784
19.027			0.14247140323856922	-0.08041137295781353
19.026			0.1411690765877438	-0.08118639199707078
19.025			0.13905728367561387	-0.08228302964905287
19.024			0.1366218108638586	-0.08376479687242155
19.023			0.13608450813530926	-0.08465242215861424
19.022			0.1344518848864551	-0.08553106313539116
19.021			0.13316474873450268	-0.0860671705371241
19.02			0.1349514427598244	-0.0855585093282687
19.019	0.262419217941151	0.0935728444500479	0.13538622270699996	-0.085600475669253
19.018			0.13634376290549	-0.08475160759639877
19.017			0.13693578760318026	-0.08477003681980899
19.016			0.13740374387571208	-0.08464117003996474
19.015			0.1379979290821991	-0.08462298080149755
19.014			0.13945571223440378	-0.08392578482239843
19.013			0.13888633838430575	-0.08402845863577713
19.012			0.14061844199906215	-0.08335741763218962
19.011			0.13824010432973122	-0.08395953603681372
19.01			0.13912436763497116	-0.08385790498774681
19.009	0.262919871573262	0.0935547582392749	0.14145425533881095	-0.08329639749435369
19.008			0.143740079057757	-0.08267888777033328
19.007			0.14397643340880517	-0.08257591181210833
19.006			0.14500644531148676	-0.08249302602555475
19.005			0.1428067331535532	-0.08328149880621472
19.004			0.14249828845268553	-0.08304630311598316
19.003			0.14393685772940223	-0.08260254680010126
19.002			0.14504949482735885	-0.08221069966348193
[truncated: 19,041 more rows]
