# Supplementary material for: N 2 O changes from the Last Glacial Maximum to the preindustrial – Part 2: terrestrial N 2 O emissions and carbon–nitrogen cycle interactions
Source: Copernicus journal article supplement (doi:10.5194/bg-17-3511-2020), 2020-07-08
Supplement: Supplementary file 1 [file bg-17-3511-2020-supplement.zip › data_fig7.csv]

time (kyr BP)	Temperature effect	Precipitation effect	CO2 effect	Orbital insolation effect	Land mask effect	Other non-linear effects	Temp. dependent yield effect	Reference simulation
21.0	0.04152317122048643	0.009004371627440833	-0.057395453544708985	-0.011265320850250227	-0.011495762305711033	0.09604775022366141	0.03781025183923692	0.06641875637091843
20.999	0.026550261529369124	-0.008288635919909915	-0.056581566031507435	-0.012234804519970943	-0.011246600066111334	0.10351294803213396	0.030638232095386186	0.04171160302400345
20.998	0.01881179016610357	-0.016418769795222055	-0.05132098127097606	-0.011131153370074642	-0.009449222757418774	0.09990741776098933	0.025920338088849526	0.030399080733401362
20.997	0.018202003150658896	-0.025525022733784652	-0.04791301616267507	-0.010721555512952285	-0.011913059317337549	0.09826714184163876	0.02086941776259188	0.0203964912655481
20.996	0.012505650837331572	-0.033106353306708414	-0.04747532254956077	-0.009282350055785038	-0.013401817368645652	0.10060570496326893	0.018835039396464026	0.009845512519900623
20.995	0.01831734169218624	-0.02935726566475072	-0.049620440170251356	-0.006555980038920772	-0.011197247775848851	0.09168613814141757	0.01707089428503039	0.013272546183832112
20.994	0.020508176525712685	-0.037357594084643786	-0.052465030704066606	-0.005025628318136022	-0.011470216900749008	0.09001478455338319	0.016660307496457527	0.004204491071500449
20.993	0.015589921327295642	-0.038475562029458565	-0.051122216934966325	-0.0025886027226365016	-0.017349322228871422	0.0931116515940742	0.013592569570364255	-0.000834130994562976
20.992	-0.0004275004576239638	-0.02169409610254558	-0.0487063834889101	-0.0017379359182783105	-0.016086904950076253	0.08238212971861181	0.010320321061120907	-0.006270691198822398
20.991	-0.0020761690831703206	-0.03709361301459957	-0.04558516730684126	-0.0003490358636719648	-0.017592015779805514	0.07835395763627684	0.004894950649915408	-0.024342043411811787
20.99	0.0018275779639367329	-0.056584886994476946	-0.04342493259453484	0.00039484402373091143	-0.018857196962859923	0.07462454468256219	0.00251216356953865	-0.042020049881641874
20.989	0.009729269660157414	-0.0709754873709425	-0.040122618010988376	0.0012193434386595925	-0.018982388209797918	0.06882964983537931	0.004112724161672077	-0.050302230657532476
20.988	0.012025170155823162	-0.051991299363741916	-0.03865121632370894	0.0007878392776587972	-0.01623241677216658	0.06971232832687058	0.003840262724098764	-0.024349594699264898
20.987	0.01589893560782052	-0.05155202106215917	-0.03676419981516066	-0.0007818759140825193	-0.01575376783029192	0.07392995063369323	0.00578760440899817	-0.015022978380180518
20.986	0.005795661560805243	-0.04356894838620651	-0.03846411086293333	-0.0024073859812734355	-0.016317891344422186	0.07865297994597498	0.004059849549505223	-0.01630969506805524
20.985	-0.003889543959782138	-0.05368704240788613	-0.03763297450156777	-0.0032885356825156364	-0.019090807739955196	0.08059243121051995	0.0009754546702769318	-0.03699647308118692
20.984	-0.014388111227614964	-0.06813192988793926	-0.033633123012807964	-0.005025669401039323	-0.021475628628250476	0.08177456257993843	-0.0051556139575197335	-0.06087989957771356
20.983	0.0061138323164247055	-0.0741613521446709	-0.0297463201088366	-0.006508643544139048	-0.02001792703352745	0.07418377248320862	-0.0053380648090257665	-0.05013663803154067
20.982	0.025523063524763856	-0.07086162264886564	-0.027841633762545115	-0.008373399957716465	-0.02110125619297598	0.08197296955565125	-0.0001297438938445694	-0.020681879481688092
20.981	0.044765115941424405	-0.08305300690888906	-0.029475740482030943	-0.008419851725034455	-0.020179511738683154	0.0876552888987856	0.003370071138058428	-0.008707706014427607
20.98	0.04021078081146712	-0.08220134612670105	-0.03054516879435365	-0.006407079761357792	-0.021239885997229813	0.0915680331349984	0.006750321527776215	-0.00861466673317679
20.979	0.04126567340941989	-0.10135537445381626	-0.0313198329025024	-0.0028364709855193126	-0.0200385888740664	0.09638388189740965	0.006185092467572595	-0.01790071190907483
20.978	0.04350137222564232	-0.1096697697341158	-0.030540558514811522	0.0016284834853079744	-0.020924348812598303	0.09358464895205643	0.004237346632368855	-0.0224201723985189
20.977	0.038011726838451665	-0.10278281742936013	-0.033647119660132674	0.0038485213478836044	-0.022061604278098557	0.0982859874388593	0.0027696338110612118	-0.01834530574239679
20.976	0.020628568693974003	-0.09933066049737427	-0.035029280303061405	0.003827704828681	-0.025089384453846897	0.10285015414019316	-0.0025798921587183443	-0.032142897591434405
20.975	0.023196545548227476	-0.10807866246218456	-0.03416679784967869	0.0038541981272786074	-0.026475358757668488	0.10010395607323463	-0.004960841050418274	-0.04156611932079102
20.974	0.0274398453518776	-0.11873580981147125	-0.033341644539273574	0.0036578177501942477	-0.0280809439257812	0.10036386384804086	-0.0028067477842217414	-0.048696871326413316
20.973	0.02575219676384144	-0.12497305014424587	-0.03479255189641073	0.004432379562607558	-0.02677716057377122	0.10298407925882458	-0.005726624463182617	-0.05337410702915424
20.972	0.012051529737716393	-0.12308012421618564	-0.030464362819638602	0.0054216922622201125	-0.027081351604436144	0.09275240616356317	-0.004900729753034128	-0.0704002104767607
20.971	-0.0022104670806095683	-0.12275471784357528	-0.031169840366433554	0.005667474965783015	-0.026354181139881305	0.08890096745983112	-0.004434060399653106	-0.08792076400488558
20.97	-0.013457775346529033	-0.10636344967575706	-0.03252606611068298	0.005906772466182986	-0.022727336047185354	0.08314127380885328	-0.0034894904722229114	-0.08602658090511817
20.969	-0.010013651839252624	-0.10877869942123741	-0.031852756236310675	0.006332396738888413	-0.023196702737015684	0.08000530235706016	-0.0033713170506324275	-0.08750411113786782
20.968	-0.004445164451378325	-0.09704440137588399	-0.03119743404555919	0.00605297181220088	-0.021411546666243453	0.07357551467338563	0.0004972937019553925	-0.07447006005347845
20.967	0.0010367973987195356	-0.08983595555509183	-0.0317089749429833	0.004359573788311977	-0.019780753412077523	0.07081416058718037	0.0014282116250852184	-0.06511515213594077
20.966	0.014344555891661948	-0.08452677612615922	-0.03248164493694983	0.0027277157340446223	-0.016319646981092895	0.07084290215290423	0.00735048884027556	-0.04541289426559114
20.965	0.029507677064787963	-0.09350027086486623	-0.03196001423443118	0.001366382392926191	-0.012845692370637707	0.07216255061234644	0.011389488137399262	-0.03526936739987452
20.964	0.028230838457941054	-0.09858169926903937	-0.030211981953987	0.0012585703212435462	-0.012765366703365366	0.07394659458013919	0.012849000786856912	-0.03812304456706794
20.963	0.016777361330500007	-0.08497760010763589	-0.028433502374717534	0.001999555234839079	-0.012367418867131441	0.07348689138483167	0.010346523390710516	-0.03351471339931411
20.962	0.022967754033532017	-0.10046868634417994	-0.028460141091526836	0.0018173613932379595	-0.006584263214526764	0.06347788639353791	0.011488764992000355	-0.04725008882992565
20.961	0.02691921660677643	-0.10354806662390814	-0.029254301579213937	0.0014622371720678373	-0.00628359657493327	0.0705838137388417	0.014960876479065632	-0.040120697260369376
20.96	0.04349990213292276	-0.0913441661775991	-0.028576877030723757	0.0002680900353668747	-0.004603490311525071	0.06974731108052268	0.021234557248430264	-0.01100923027103562
20.959	0.03379098005534509	-0.08021276520163934	-0.030042946795048486	-0.001530966096521702	-0.00640163776397884	0.07127544879603409	0.021784882605436096	-0.013121887005809185
20.958	0.024672084989584064	-0.06370865272983028	-0.029128181743119264	-0.002244014532083227	-0.005861925188973771	0.07185860371934272	0.020783554575211305	-0.004412085485079764
20.957	0.0018708968856788744	-0.08165074215159063	-0.02529370043723045	-0.002152922309688776	-0.010382272830796957	0.0712488400089244	0.015451752599771496	-0.04635990083470354
20.956	-0.003980687457077359	-0.0935054335728589	-0.024168921167885493	-0.0037456857476563243	-0.009649589369899125	0.07464583715272699	0.01152976605440692	-0.06040448016265021
20.955	0.0020371230573612564	-0.09727507929287693	-0.02050482810499421	-0.003217190150381022	-0.009618680454578588	0.07231823219258882	0.01031513619741542	-0.05626042275288068
20.954	-0.007937137198417155	-0.09453084126049394	-0.018975918953135995	-0.003452651824631836	-0.008698711725126707	0.0689867606245711	0.009673154995740951	-0.06460850033723453
20.953	-0.0051552196528996674	-0.08555863408986841	-0.019665056649962764	-0.0030032045714136757	-0.006868689079336576	0.06812560604164375	0.01148970256052717	-0.05212519800183735
20.952	-0.02897948140081752	-0.07896091264788918	-0.02287231966632053	-0.003386292248670486	-0.007719664599398435	0.0720191406580728	0.007306747527300317	-0.06989952990502335
20.951	-0.057740880086678104	-0.08688079546710092	-0.024395600878869494	-0.003311080151357615	-0.008025082520037863	0.0710756787012281	0.00023663580107236015	-0.1092777604028159
20.95	-0.08642736114948057	-0.08304160502762059	-0.024357796858773817	-0.003982340058002798	0.0029453044205256518	0.07654059861169316	-0.00556197788335222	-0.11832320006165897
20.949	-0.07670583972694889	-0.08311207809605925	-0.023501122058735113	-0.005143489510841981	0.0034255692348210687	0.07077490867820657	-0.004878855658732917	-0.11426205147955759
20.948	-0.09429121622288861	-0.0743909853493987	-0.023685196902846428	-0.008115850810702874	0.000878278418658951	0.07170627184478118	-0.007115454462658377	-0.12789869902239648
20.947	-0.07315211475009509	-0.0668733760688367	-0.025313268100891406	-0.01275671150267943	0.004041023125155974	0.07566242549705304	-0.001728228299260337	-0.0983920218002936
20.946	-0.07867962211814383	-0.07277964031771234	-0.02360001192498906	-0.0155463153711759	0.003328805064195528	0.08337171259570031	-0.002504453656309913	-0.10390507207212529
20.945	-0.07845673822311294	-0.08024077588637901	-0.021207258335049772	-0.01538622683573454	0.0017803452887656945	0.08541943832849608	-0.0012866621108713616	-0.1080912156630145
20.944	-0.08238590097438525	-0.08197609949538087	-0.021842355449257056	-0.014436743028618082	0.0015764220951766106	0.08193594563968087	-2.9558071116042584e-05	-0.11712873121278378
20.943	-0.07758826488967152	-0.06914185022254049	-0.023088952583122158	-0.012294225889600163	0.0020283601111366067	0.08009431108925735	0.002750701889430829	-0.09999062238454037
20.942	-0.06591672888884137	-0.0612161185081348	-0.02154561915307074	-0.010298401788866762	0.0022552523220698006	0.06978157063941026	0.006903235140640618	-0.0869400453774336
20.941	-0.058206007870204246	-0.04717024698994354	-0.02444418582002683	-0.009741571334455301	0.005478237999795965	0.07057116863046264	0.00723077630729918	-0.06351260538437131
20.94	-0.04481786958277301	-0.047861273071081456	-0.02152237185902628	-0.008900304097614331	0.0071688565955403405	0.06287831480719408	0.010024286332527055	-0.05305464720776065
20.939	-0.04072741490408571	-0.058938079055869785	-0.01751524558580453	-0.010413019838719784	0.005930463876469005	0.06673530844260434	0.010542996937659588	-0.05492798706540647
20.938	-0.01029036217300039	-0.04381377455638358	-0.020824564471535467	-0.011046301170669182	0.011261404650596774	0.06381516236197537	0.01649773941394983	-0.010898435359016467
20.937	-0.003910489859612731	-0.03781766272215226	-0.020470909846714846	-0.010643569346116877	0.011679991697343794	0.06285382611921175	0.01626271958662784	0.0016911860419588365
20.936	0.009310310810866973	-0.034476181981276	-0.01938319717591508	-0.009461784718619803	0.013040699522104404	0.058698241519421046	0.018609324689627726	0.01772808797658154
20.935	-0.0007038102374075095	-0.03737888481047413	-0.020058348012124583	-0.008626048365317551	0.011424465105742243	0.054064725307862105	0.016732008390682118	-0.001277901011719429
20.934	-0.00743661325854994	-0.03859069504737356	-0.022114221621637675	-0.008026239267128865	0.006567484437633553	0.054098405395511584	0.012864260769361202	-0.015501879361544901
20.933	0.009911687048588469	-0.033952058862589674	-0.02552768086505175	-0.00936107999995528	0.009675525107722294	0.05183133445050725	0.018919030112693136	0.0025777268792213093
20.932	0.001693649643288886	-0.02278912538704514	-0.02418528990579194	-0.009052946682934326	0.010438192450012096	0.04779549286348406	0.017761967724244876	0.003899972981013633
20.931	-0.008796981145688498	0.004039151782330386	-0.023948590081681154	-0.00926563550781534	0.012006669146317428	0.04738860793322619	0.015893023486856173	0.021423222126689012
20.93	-0.001829827498573522	2.645217438512759e-05	-0.02170335304084059	-0.007896727910895684	0.013307431255808133	0.03817642172448643	0.01659526427096747	0.020080396704369896
20.929	-0.020913282899146957	-0.012006211104082176	-0.021605779018750937	-0.006262154118505947	0.011918804758469292	0.03536441061104689	0.012974170208207347	-0.013504211770969832
20.928	0.003439571068416747	-0.004077340290704612	-0.02152503564920405	-0.004726419469049503	0.0169073434419289	0.03155448450023357	0.019015598734848815	0.021572603601621054
20.927	0.007157169773453376	-0.0163022347338444	-0.0216673982655351	-0.00314083170898094	0.018061592184934305	0.023237473813480847	0.01922672934542824	0.007345771063508089
20.926	0.017581390145541498	-0.023518211851877524	-0.022651053116789832	-0.0016772995791818346	0.018206350471837496	0.01955710807867206	0.02090788444447167	0.007498284148201861
20.925	0.027188272599515173	-0.007567588667500402	-0.025226395392446754	0.00034140690396267104	0.020525511405884878	0.014603416654462187	0.023584962245085883	0.029864623503877752
20.924	0.02546095764961276	-0.008001054923474804	-0.022681488080696255	0.0007220437932842216	0.01949689157374035	0.009446766244072258	0.02564384890619742	0.02444411625653853
20.923	0.0402011011266481	-0.016660180589602724	-0.022162855514737956	-5.7782222310009956e-05	0.01641822913629909	0.010957941540182148	0.029038147451939444	0.028696453476478645
20.922	0.04173856516586838	-0.017987493792309905	-0.024005769748546513	-0.0020713388408921674	0.015057733637297233	0.015345013925074369	0.03213447489030319	0.028076710346491396
20.921	0.050911789381088646	-0.013506167757364018	-0.022899426005120738	-0.0028740692071727025	0.014300498621262925	0.017964275075492253	0.03763410585525673	0.043896900108186365
20.92	0.0530463160234822	-0.012194255058697756	-0.022405396828812485	-0.0037530544256227927	0.014940035442996269	0.01650428993357078	0.03943344409158911	0.046137935086916215
20.919	0.07225757392837018	-0.009408836299881429	-0.018587894416162598	-0.003609356378165174	0.006074322625338802	0.0025263360576852634	0.045225180739738136	0.04925214551718504
20.918	0.08679935810158401	-0.004052255635834001	-0.01474501229073688	-0.0027834131241792903	0.012145401069112438	-0.007452151323649403	0.0474385712091836	0.06991192679629687
20.917	0.09778998846806086	0.010904237662590965	-0.011349583140875197	-0.0018365240301534413	0.01704897890930024	-0.01071025692834926	0.051157665091391635	0.10184684094057417
20.916	0.073591540153922	0.02051064084256371	-0.007331675493930767	0.0010757062789608085	0.012423035884495448	-0.015089658874169132	0.047040693018704616	0.08517958879184206
20.915	0.07747647929631096	0.02076466193247306	-0.006571108879123599	0.0014131837794737478	0.015036141767044597	-0.02883176434193313	0.04865271794387471	0.07928759355424564
20.914	0.08471437162209483	0.010950520133749642	-0.006836628759467445	0.0020337246727955005	0.01613665382170293	-0.03345177220950646	0.048810118262542446	0.073546869281369
20.913	0.08134907679849146	0.021014945568234467	-0.007370785978231709	0.001386033675005116	0.01760149591025595	-0.030406476391029003	0.04984174640117178	0.08357428958272628
20.912	0.07498711632299493	0.017045359968334672	-0.005746608840890843	0.0006739014659213893	0.015191036331866137	-0.029672374846003713	0.04780605158134055	0.07247843040222257
20.911	0.07643953564955375	0.009398619389568985	-0.005672488573162049	-0.0021217870315979326	0.015199743440896363	-0.02665978772621358	0.04697651672951242	0.06658383514904553
20.91	0.06663875373013095	0.004491925346783887	-0.0046349462485570925	-0.0036106522993772927	0.013301747114928375	-0.02688443686185682	0.04690242594560701	0.04930239078205201
20.909	0.03708453013049251	0.002257305450924285	-0.006827517132960814	-0.004457001368798785	0.0073294642485270955	-0.008134101865891807	0.042610723977749565	0.027252679462292484
20.908	0.045347318296044214	-0.009452774590516633	-0.004068529670617771	-0.003257189444501485	0.006138125060788369	-0.011890725776679822	0.04534207814347546	0.022816223874516872
20.907	0.028504732394355692	-0.019255619063176965	0.0004591313855115686	-0.002103972488053607	0.0026122273905890836	-0.008620693747474206	0.043242362713180604	0.0015958058717515655
20.906	0.0344603152275873	-0.028429780478186117	0.000309027332122902	-0.0007691533230067549	0.0031112636988481768	-0.007221532241184825	0.04902250301259947	0.0014601402161806831
20.905	0.03291574278394904	-0.042109688475810536	-0.0007305899223126744	-0.0023354457502016146	0.0027135048951993923	0.0039395982397048	0.051999311436356166	-0.00560687822947159
20.904	0.02211779536701286	-0.02343143648790047	-0.0004290624919134345	-0.00330354403570432	0.006241073927809815	0.013126274715562047	0.05066243779999624	0.014321100994866498
20.903	0.010883272921722309	-0.02316114690660065	0.0023769863883575937	-0.003829213054124203	0.009545986615865587	0.016256242433268397	0.05270233407741465	0.012072128398489035
20.902	-0.02968471352919888	-0.027493937598556784	0.00782635296658718	-0.0017913690953550443	0.005974418752979993	0.01531524240119797	0.04374093121313738	-0.029854006102345565
20.901	-0.01983237859967435	-0.05391857122422916	0.007345261468483244	-0.0036994245398522807	0.004367039278783125	0.020551596163551622	0.04670149275907942	-0.0451864774529378
20.9	-0.019906817261351684	-0.05708810540077369	0.009161683097666184	-0.0045391642952470335	0.0047132578425177485	0.02094224989921667	0.048113757575994676	-0.04671689611797181
20.899	-0.025205345871574636	-0.056612504871347724	0.010146202231396728	-0.0070109852337481016	0.0030550333636396587	0.02607992649650459	0.04626371361081283	-0.049547673885129484
20.898	-0.020507587211647582	-0.04550474778004787	0.010762068899216715	-0.009313578392030841	0.006113086795143552	0.031681833666494796	0.05050326497180624	-0.026768924022871232
20.897	-0.055366664616147254	-0.05822667080642674	0.013309410652169618	-0.009637432820523983	-6.276727831444617e-05	0.027510199804598123	0.04464819577648438	-0.08247392506464468
20.896	-0.04145768454958354	-0.06147154375392372	0.014103989862893407	-0.010310980745503073	0.002788774762594315	0.03002671271619839	0.05010819486143614	-0.06632073170732422
20.895	-0.0552917084793787	-0.059186646959064504	0.013804746185837935	-0.010991711619791289	0.004116421760537392	0.04203076696168573	0.049334445695009777	-0.06551813215017344
20.894	-0.07572312954928506	-0.06740947095677718	0.016427115389372027	-0.010275118491468227	0.0012296128736251077	0.03807263460698618	0.04587900019864133	-0.09767835612754716
20.893	-0.08269866424093752	-0.06113023477670332	0.014783761611381507	-0.010280356290037318	0.0014503132317518208	0.04001941542727927	0.04255884023280121	-0.09785576503726556
20.892	-0.0856797889485792	-0.05120990309441531	0.015273892421735269	-0.009611355414556044	0.0062021021745586324	0.03006617382640897	0.0401182218533096	-0.09495887903484768
20.891	-0.09684639596887568	-0.05386825316087673	0.017370020690829158	-0.009028497815949166	0.004611556901831904	0.03098395105641405	0.036280299511362024	-0.10677761829662646
20.89	-0.0808620545848413	-0.0568106899066132	0.019616588987676487	-0.008901937431645912	0.008820970048851073	0.023692056840736164	0.03792374202266835	-0.09444506604583669
20.889	-0.06891806673118417	-0.05055983591376734	0.01956866154229875	-0.007796850442146841	0.008889887291880783	0.019767534308078538	0.03957526508582898	-0.07904866994484028
20.888	-0.063719901219212	-0.03864330038517405	0.02113744885268165	-0.0053600078945024165	0.012019967134519582	0.011401523916162226	0.035649195713444826	-0.06316426959552501
20.887	-0.08285466152113496	-0.044378577606169145	0.017020072984834655	-0.004349253014355625	0.007984150037251503	0.0179804607613967	0.031200041729357864	-0.08859780835817688
20.886	-0.07899321185187524	-0.07020323424841912	0.017247625666090727	-0.0025928336836420485	0.004869287497411001	0.01750877791561134	0.029721204730878803	-0.11216358870482335
20.885	-0.06383273232580144	-0.08215912605979092	0.016847829945803916	-0.0030108320596466953	0.009614530796007159	0.016327353404422595	0.03072334630966811	-0.10621297629900539
20.884	-0.06544441970457893	-0.07656890024967922	0.018517926413203156	-0.0012347423242999866	0.008388080950688881	0.02026989045938432	0.02645710293376702	-0.09607216445528177
20.883	-0.07690618355796452	-0.07684359142870445	0.020072280589324087	-0.000671869395065805	0.006643543842420385	0.01714006063945206	0.022873690719380946	-0.11056575931053825
20.882	-0.05871369107521751	-0.08853980141696205	0.025255164761267324	-7.964512103164623e-06	0.006883471173409816	0.009930707207437273	0.024570233421544074	-0.10519211386216831
20.881	-0.059793412705089644	-0.08468177509806729	0.025577917767268588	7.990835633187032e-05	0.008283708662406575	0.00629124021205385	0.02476918651783322	-0.10424241280509605
20.88	-0.0743851414685448	-0.07768324661873471	0.02737582585525633	0.0011482670719180632	0.005719859389717641	0.004675836722356941	0.022586309068779897	-0.11314859904803054
20.879	-0.06536362279013108	-0.08844699827265945	0.031020112604928762	0.0013645147079284214	0.0036126726074678928	0.0024517073532956957	0.022048832762241233	-0.11536161378916976
20.878	-0.050319111280231255	-0.09003223406323446	0.03335867397367043	0.00199678829040284	0.005836616256959637	-0.015043657529378862	0.02149524527213842	-0.11420292435181167
20.877	-0.05796157768801091	-0.08169104770026525	0.03457103604124523	0.002814567913420163	0.005782774059824192	-0.01423958902315725	0.01771790920377292	-0.11072383639694383
20.876	-0.06313281370693602	-0.07965511584046503	0.034615716150580234	0.003882815493244429	0.007164634496318989	-0.022426750540548213	0.01466773267963184	-0.11955151394780561
20.875	-0.06344818855040124	-0.08240921072052121	0.03613112727398704	0.003714689820600192	0.006167915511063882	-0.0263742297446532	0.008220202700600865	-0.12621789640992453
20.874	-0.07138985901723327	-0.08222468313120146	0.03889237382286126	0.005339537452631049	0.0034652945802546853	-0.02928169057273422	0.004681909014102814	-0.13519902686542196
20.873	-0.06624534595442544	-0.10753108517488652	0.041258655490998386	0.00690679307168196	-0.0001593390648926274	-0.03131521102194501	0.004672128648178564	-0.15708553265346925
20.872	-0.055874383044599796	-0.11258247101152552	0.040778179916664214	0.006888469564414912	-0.0004867425107848433	-0.029348029755889016	0.006250502089767629	-0.15062497684172005
20.871	-0.020479802232205913	-0.12151070962570731	0.03757249812061936	0.0052522276108426524	0.0006177251687873309	-0.02120173825201377	0.012875011449110296	-0.11974979920967765
20.87	-0.026063521021378655	-0.10830260514442624	0.03649866077020025	0.00515822783432629	0.0029490618415888292	-0.014001470888719503	0.013089288438467683	-0.10376164660840903
20.869	-0.02719928638907998	-0.11846650385265622	0.03435231630368385	0.0048293746707051	0.002501744300549724	-0.006798589102240626	0.010847770455137073	-0.11078094406903816
20.868	-0.03303714329469365	-0.12577026538726344	0.03573784844910577	0.004713599161486393	0.0029907256593171283	-0.010105183369581994	0.008851385783856358	-0.1254704187816298
20.867	-0.04384329466209458	-0.13168658255158494	0.03767677071124087	0.004214357191894003	0.0027498493194979545	-0.013740426355033364	0.0040186733320117796	-0.14462932634608006
20.866	-0.04125428668786846	-0.11551203878471572	0.040876272128337554	0.004247217641853318	0.004816692015069179	-0.016268518379394692	-0.00041372565935304806	-0.12309466206671882
20.865	-0.0541546498201102	-0.11535043982510373	0.042910881340009865	0.0045669788353714935	0.002610574721333414	-0.022234437753767544	-0.007211830470414959	-0.1416510925022667
20.864	-0.0366516637272829	-0.11205217250200938	0.05018909448179887	0.005279379270690221	0.0043046512914575175	-0.04696521060265635	-0.004848383522097599	-0.13589592178800203
20.863	-0.016504349561981435	-0.1090604186991504	0.05437421130671183	0.005304227192933553	0.0070211322227615725	-0.05548814566938187	-0.001252680634878267	-0.11435334320810675
20.862	0.0021221988824242644	-0.10994464526417325	0.05696198697324917	0.005931782566918287	0.007713264428115707	-0.06427137719085785	0.0024404864306584173	-0.10148678960432367
20.861	0.010310590415070209	-0.1078153187539197	0.056055699233277245	0.006819322528321514	0.008254945426696914	-0.05758476703147419	0.009865442328583107	-0.08395952818202801
20.86	0.033173435433715426	-0.10301391378832925	0.05402292336099013	0.00853988568489239	0.009978249959918806	-0.059073498068361374	0.014821907296073356	-0.05637291741717387
20.859	0.02710649219628447	-0.08527865548599589	0.04705333626758712	0.0091352814131751	0.010549611717459939	-0.047779004809362036	0.01565475315279219	-0.039212938700851296
20.858	0.023293249946538808	-0.08132480501502304	0.04503077897332908	0.008610647558586315	0.01318122577315517	-0.046950982690767695	0.015995640828892377	-0.038159885454181364
20.857	0.01929241744806731	-0.09590043253692482	0.042655065129634906	0.004365610649371909	0.009431021463589317	-0.03263711878242859	0.017718893220760812	-0.05279343662868996
20.856	0.038921279714052126	-0.09991237473038517	0.045012411327507884	0.0019722179300245557	0.011414640989445779	-0.035917372444376205	0.02299478841477942	-0.03850919721373103
20.855	0.033900331094367075	-0.07971120394610498	0.04320354232193857	4.001490384109019e-05	0.011800863759634517	-0.039358187955150115	0.026190614135277457	-0.030124639821473842
20.854	0.023692117242645416	-0.07294037468983205	0.04411196645035087	0.00021562855588896923	0.012105201850132197	-0.03720173152717621	0.02912690132393081	-0.03001719211799081
20.853	0.017323182130700943	-0.07137646326471536	0.044548540306811546	0.0005518039827148158	0.011731466380927813	-0.03888088814031754	0.03308146191761274	-0.03610235860387778
20.852	0.03001176914771797	-0.059133815652663735	0.046080410664432137	0.001019721988134492	0.014448662518755206	-0.046409296315798265	0.039587714908935645	-0.013982547649422195
20.851	0.02253889434038303	-0.056999198674535734	0.04605707295694472	0.0013799586162042132	0.01226554599547125	-0.048939612702109336	0.03947796787794022	-0.023697339467641854
20.85	0.038989128439304466	-0.06335154323117997	0.04656735975564885	0.001214276265074865	0.014243478764676354	-0.0516556336326115	0.0413071683735291	-0.013992933639086935
20.849	0.05441739990208294	-0.04817816674164188	0.045487274168189984	0.0010129840513819488	0.016851522222204984	-0.05480172693654417	0.04277862474057592	0.014789286665673806
20.848	0.04492064870118373	-0.04273706800092025	0.04184418702458892	0.0018945575056630304	0.017198846378438937	-0.05429584808277266	0.0412217577335241	0.008825323526181705
20.847	0.052201242162446704	-0.04041088182359864	0.042427387288380025	0.0014343360316351195	0.017994109620811827	-0.05091896691777542	0.03996257591332597	0.02272722636189961
20.846	0.06483954490323818	-0.032486564681751595	0.04098140702853481	0.0010239817077390967	0.02178160145223984	-0.06457383991914334	0.04001170528628162	0.03156613049085699
20.845	0.05335206492071265	-0.04114403564134683	0.044327728108594755	-0.000390264279344521	0.018822814685196754	-0.0663413673636537	0.0364911415675806	0.008626940430159102
20.844	0.05024339071911843	-0.03905939837953376	0.04753619699225453	-0.001692911084885118	0.019653466591380564	-0.07381439472639606	0.037299382586145846	0.002866350111938587
20.843	0.04089810058877674	-0.03829052773606545	0.04807474850192062	-0.003132615265578842	0.019328780646525878	-0.07418720229781961	0.03611802104594375	-0.007308715562240664
20.842	0.043811168420297086	-0.03113362051048263	0.04899941102687677	-0.004210413946118763	0.019934580562925852	-0.07724933878494245	0.03734029643591885	0.0001517867685558727
20.841	0.046407968513273445	-0.025678746446339495	0.05385251545204639	-0.003613040727526773	0.022838733852758253	-0.08958915973000625	0.03791614301453183	0.0042182709142055685
20.84	0.017741388945280434	-0.011771634700120437	0.056855537683920154	-0.0024527280621748915	0.023759853111761764	-0.09064904365688964	0.03316177653082164	-0.0065166266782226145
20.839	0.02362550165810884	-0.011480603702024972	0.058684229631163376	-0.00060166243224824	0.025101355853453633	-0.10401304369725217	0.032043481475473534	-0.008684222688799537
20.838	0.032546472699576334	-0.01163389706539153	0.058267839626589435	0.001546518450719958	0.024304144147844653	-0.10984649798641044	0.034088484390521145	-0.00481542012707159
20.837	0.035133980934308084	0.0020834312731459192	0.05363481883521448	0.0035629773444965096	0.025705837582743918	-0.10178075086372296	0.03667549392106029	0.018340295106185955
20.836	0.04320068126435039	0.003153258907419243	0.05107930108094294	0.00537366999350386	0.02563272073508216	-0.09975671965379629	0.03747489323429143	0.028682912327502308
20.835	0.05216877473958892	0.005453539292846088	0.05152261518421053	0.005514720429800057	0.02718418368084663	-0.10350173950638641	0.04208978289981413	0.03834209382090581
20.834	0.05744545161351322	0.009755900188602062	0.05564750060860835	0.005986234089915499	0.027115833095249897	-0.11121370819257503	0.04502277934087484	0.04473721140331399
20.833	0.059616810636372364	0.009156061083304579	0.05226635379314715	0.004982080340509398	0.02820908631049157	-0.10367581642115109	0.04418178036875897	0.05055457574267397
20.832	0.03326147246923217	0.006116461333625978	0.0483198279416035	0.00452696404313091	0.02488449584586938	-0.09156692131310962	0.03747437425931732	0.025542300320352318
20.831	0.014855377776250123	0.008113189973686374	0.04607131174039658	0.003912046154871618	0.022959662683320836	-0.08003733493463194	0.03519766695140003	0.01587425339389359
20.83	0.032568061365498835	0.009676918972084891	0.04860693201495625	0.0029098503173790036	0.024562140282620604	-0.08833959317960449	0.03301123880491641	0.02998430977293509
20.829	0.0063572211462323835	-0.00032855406160337	0.05176139187202633	0.0020311858952020145	0.021487672115656054	-0.08793201348439439	0.02672562278651025	-0.0066230965168809774
20.828	0.02911499535733153	-0.02987760128558037	0.06190420761855542	0.0017046930960562534	0.020319844913457175	-0.10159910112180803	0.030107518081902818	-0.018432961421988026
20.827	0.03336107777290298	-0.043953213104429345	0.0683630139302478	0.0005890481393970859	0.020199600882032875	-0.10099260581652292	0.03289055030529475	-0.022433078196371525
20.826	0.04578224364267225	-0.035103006607187126	0.0702436564889597	0.002025943957751686	0.021831652601443707	-0.10184444274593574	0.034732524896767814	0.0029360473377044727
20.825	0.03428802525322716	-0.017477004329548684	0.06821617854072226	0.0023561135626763985	0.022842600961452852	-0.09659211632656994	0.03307724185440275	0.013633797661960045
20.824	0.03324097896070288	-0.024070435417050007	0.06753095949747312	0.002933141192417388	0.0220250360476113	-0.09694253838738831	0.028927572251841838	0.0047171418937663745
20.823	0.02826377847086281	-0.03279812236044943	0.06569998611070726	0.0030405226101510863	0.022428144705685327	-0.09909779837075572	0.023539028584177224	-0.012463488833798664
20.822	0.04756443391817289	-0.03413459914177697	0.0654549724682516	0.0020009848294009203	0.026491136666312975	-0.10631203879951912	0.024337863163263584	0.0010648899408423063
20.821	0.052844197297845064	-0.03642695334348289	0.06466863416281843	0.0007696903467033778	0.027689469582676374	-0.10432299688734226	0.023900896069330102	0.005222041159218094
20.82	0.05720152045826232	-0.010861183223757287	0.06214349241666195	-0.000811466529988536	0.0344057638544788	-0.09837092156268135	0.02442339202673338	0.0437072054129759
20.819	0.03640071205633966	-0.005413419488367488	0.06417118527007393	-0.0016873929759997353	0.033858405633458766	-0.10131550672146261	0.019610136763433594	0.026013983774042515
20.818	0.02280518176836832	-0.02250349365613502	0.06467883345265335	-0.0019141200344190423	0.03554387821511806	-0.10308175174271472	0.01854972796380583	-0.004471471997129051
20.817	0.023352531384042585	-0.02518575000694767	0.0656433833160932	-0.0015725350097426372	0.03776079686061973	-0.10679791111152248	0.01772246814463685	-0.00679948456745727
20.816	0.02491895961330126	-0.026422120022590256	0.06594072721982513	-0.000993307782207964	0.0408690860678691	-0.11005379365650292	0.02033732621008255	-0.005740448560305644
20.815	0.011948412952817122	-0.03546879911155276	0.06491641549966154	-0.000746544525654258	0.036699883719159665	-0.09830288396245912	0.018709507445277218	-0.020953515428027814
20.814	0.023981719601457563	-0.03600527468247172	0.061202632417266756	-0.00046830764455574325	0.0368827198814321	-0.08759595052763913	0.02333978948820903	-0.002002460954510177
20.813	0.02347528698667567	-0.03632714838185258	0.05657843683317498	0.0004000784368125565	0.035812518778333136	-0.07372657327254917	0.02524101296183101	0.006212599380594597
20.812	0.05276702322482674	-0.016597096904351183	0.05504999944398925	0.0004364847456113097	0.039853740076631006	-0.07939282131295666	0.03185059296627113	0.05211732927375046
20.811	0.048372124768004454	-0.0062356735024664545	0.05633984205103992	0.0013609571071135917	0.03844038215433976	-0.08130232272467719	0.03134284207758142	0.056975309853354084
20.81	0.05294721545500991	0.008758006004359942	0.053791941817999955	0.0006504500695996285	0.03749701183273668	-0.08192395119186635	0.03215349585199956	0.07172067398783977
20.809	0.0629762411609942	0.005311391805604693	0.055625516455850565	-0.0011828439705867666	0.034799739734362234	-0.09035170782469493	0.03376316451595596	0.06717833736153
20.808	0.07978665982068822	0.005021947806567617	0.05968311527572556	-0.0039112637005400686	0.032428422684600555	-0.09314635633236179	0.038751430956757815	0.0798625255546801
20.807	0.07113886875402908	0.01769242323858311	0.06303857074396824	-0.007150726188219991	0.031793897076765276	-0.09912110385119721	0.0368159509132564	0.0773919297739285
20.806	0.053744809416644834	0.03023357173903385	0.0656191482727504	-0.010311303966473062	0.02906244837975347	-0.10396952147060823	0.031045244621965118	0.06437915237110126
20.805	0.06163308543216761	0.022105725387814523	0.06853211396145742	-0.011763063826117914	0.027222875275290548	-0.1163066840137219	0.030195181533641424	0.05142405221689028
20.804	0.06456978956210513	0.0181132610627861	0.06603772677384168	-0.013017274165043169	0.028890794574063072	-0.11170799300979084	0.029126176255579672	0.05288630479796197
20.803	0.05001307161965052	0.02397193996798741	0.060003762988708687	-0.014187592979427954	0.030854743720093225	-0.09866260145816064	0.026732501776809414	0.05199332385885125
20.802	0.05206161996274794	0.01723781466494234	0.05945294976690718	-0.013558222680811305	0.029953899658410776	-0.09468045586580764	0.027488434006476048	0.05046760550638929
20.801	0.07749601371006776	0.008973410139045512	0.06439912761710254	-0.012139447732772979	0.033987495329326656	-0.10378331284003739	0.033892154324325574	0.06893328622273209
20.8	0.0884763820055916	0.015902296190740017	0.06925552146899872	-0.010216022136015468	0.04034060090303093	-0.11277683149115614	0.03636476373724751	0.09098194694118966
20.799	0.06073477228088553	0.016153962460684568	0.07349903249282175	-0.008676778633576632	0.038726964855725576	-0.11003196431144868	0.03349018249245361	0.07040598914509211
20.798	0.06623178868988333	0.021470472894554504	0.07577407308144224	-0.008459274964325303	0.04244559932077774	-0.11479294945856378	0.034487460959280014	0.08266970956376873
20.797	0.02973406349561092	0.022153615238417856	0.07238141437064272	-0.009305642195673869	0.03870193085018947	-0.10336896642088966	0.024090840458545593	0.05029641533829743
20.796	0.03525574001774334	0.02395595212322199	0.07084843287242659	-0.009142955286293386	0.03754206198866594	-0.1060278293790784	0.020523203554849268	0.052431402336686084
20.795	0.03366754957026252	0.013016793580995056	0.07251437317160381	-0.00870835529875702	0.03481454620552604	-0.11114636237631181	0.018798478368581506	0.034158544853318595
20.794	0.0465676873066716	0.0010726904249738212	0.07449613426234603	-0.008462467517988514	0.03376237224740297	-0.11708902172302516	0.01878038362841128	0.03034739500038075
20.793	0.051934549616518666	-0.009576508288565044	0.07779841172876178	-0.00710083072852985	0.03527752973915099	-0.12217605349160454	0.01869676240290019	0.026157098575732007
20.792	0.08452992565775119	-0.007508374629511927	0.07970801877202582	-0.006318929894058911	0.03873045086634175	-0.13215074906221158	0.024812816341643007	0.056990341710336345
20.791	0.06454987017770364	-0.007291731950775926	0.0798339031337516	-0.006112665393479766	0.03633906558469935	-0.12682851584973154	0.02116910796557825	0.04048992570216736
20.79	0.03946040624706093	-0.005440949054225541	0.07663436539222168	-0.005304060354403006	0.03483944120417348	-0.1191815546417363	0.01308633997391695	0.02100764879309125
20.789	0.033677339974884646	-0.020085806239989346	0.07686403416280196	-0.0029064623940469048	0.03127609712691637	-0.1296534944788288	0.011284863456007876	-0.010828291848262062
20.788	0.05147833932481749	-0.01300940287007979	0.07636281645531806	-0.0021270330914546776	0.035477422397693026	-0.13129300340239425	0.01709208787623595	0.016889138813899862
20.787	0.06367888353145279	-0.01144240779259853	0.07888981112547278	-0.0025275160608169145	0.03349342066780814	-0.12751593550523133	0.019107154040121976	0.03457625596608693
20.786	0.0790503065680328	-0.016155493472190585	0.08327017636429801	-0.004976433404173974	0.033138190463733785	-0.12464658515701466	0.023956396387053047	0.04968016136268538
20.785	0.07720779917101872	-0.019201429665758774	0.0843441949626964	-0.006890342097480406	0.03010249683072974	-0.1240181218007077	0.024864999895588547	0.041544597400497985
20.784	0.072677092424418	-0.019641768014778904	0.08380989792706384	-0.0096617815969946	0.03192344365733657	-0.12482664834921753	0.0246391873416405	0.03428023604782737
20.783	0.06592657720373385	-0.013130532754428437	0.08601272096232382	-0.011827195144962666	0.03147096237075697	-0.127428889152152	0.020000479806180138	0.031023643485271535
20.782	0.06808782695010773	-0.015377102731347847	0.08565920109285141	-0.01382448103990086	0.03174820503300779	-0.13367048663344416	0.014342315287948715	0.022623162671274066
20.781	0.03970273321521933	-0.035845231418434764	0.08326065046533326	-0.015845259530506084	0.02706701866879513	-0.12808932544717422	0.004201041478635759	-0.029749414046767342
20.78	0.04412768894348673	-0.0400033691343884	0.08244966283172506	-0.01735879036731003	0.028786641191416606	-0.12842909625713084	0.0049131786312264225	-0.03042726279220087
20.779	0.035180967132561136	-0.042033806740725765	0.08467198017940802	-0.01711273319864759	0.022538479641802667	-0.12145910365782431	-0.0001971920640224667	-0.038214216643425836
20.778	0.04450128014103605	-0.03485019882238394	0.08537844035742648	-0.01733527340053964	0.02578707613817688	-0.12331850964405966	9.18672393703801e-05	-0.019837185230343835
20.777	0.01726870113798995	-0.03595090684026836	0.08445464995127772	-0.017050021557314388	0.02150113343861282	-0.11704694935130089	-0.00517044593212912	-0.04682339322100315
20.776	0.022269200430338643	-0.04069872980082856	0.08618160283536813	-0.015686314766415244	0.021506238165519775	-0.1163909754451895	-0.004627028578735093	-0.04281897858120676
20.775	0.05447638554738177	-0.0594266062506259	0.0898358853021044	-0.01529998726744708	0.02256962062710066	-0.12578123421543275	0.0010996262137439317	-0.0336259362569189
20.774	0.06176870117186084	-0.05287362379712501	0.0903713094688321	-0.016197290419668775	0.025314504998611653	-0.12171132250515981	0.005188866312592744	-0.013327721082649013
20.773	0.06507931688393409	-0.0602039462993087	0.0901079117708381	-0.01735167603022081	0.02484292257836529	-0.11741986520821701	0.0065988707842690175	-0.014945336304609036
20.772	0.07248774741530717	-0.0583324275607886	0.08961114109242097	-0.018301690229310275	0.02359310385488289	-0.11499292181314757	0.007495093871528802	-0.005935047240635427
20.771	0.0719940125273455	-0.046952634188279774	0.0877717813385619	-0.019725339756777593	0.024876006031694153	-0.11922754440340544	0.008855353234897834	-0.001263718450861262
20.77	0.0513558567593142	-0.036100193470190334	0.08485107727013652	-0.020904063716026933	0.022105782088598147	-0.11122491769541654	0.0057678837504218095	-0.009916458763584934
20.769	0.0418980243425473	-0.04485635761425932	0.08480434927081237	-0.022218751575023177	0.020125290181860933	-0.10914817323199522	0.0010836160320852883	-0.029395618626057107
20.768	0.06295785507272367	-0.04027598658964049	0.0844773900593383	-0.021418777639948594	0.024309198194592874	-0.11683405467034369	0.001330299426553161	-0.006784375573277934
20.767	0.06442053701579464	-0.03066872755144967	0.08724191821809324	-0.019891486146550896	0.024788126114140496	-0.1234613867692298	0.0018952547020587573	0.002428980880798015
20.766	0.07585531387586997	-0.014483150638756825	0.08619936350859803	-0.018153246724668115	0.027699539777112037	-0.12134247173078361	0.004720893610786092	0.03577534806737148
20.765	0.04920197115873659	-0.017291934416056698	0.08480996879452007	-0.016933215366705667	0.0266670446178372	-0.1076256574265253	0.001278345450447027	0.018828177361806198
20.764	0.03071012128287265	-0.016160268107971554	0.08383412609122143	-0.018016403994058017	0.03035226903338728	-0.10376325397951014	0.0011792274962614258	0.006956590325941647
20.763	0.004067592506521223	-0.013317507055977451	0.08486831179013787	-0.018439799999316442	0.027179869778487742	-0.09616317399962071	-0.001550542753784967	-0.011804706979767765
20.762	0.00264815065048829	-0.00482350680315502	0.08670153133023462	-0.021719642392821648	0.029003497186003813	-0.09644780416051635	-1.1729414460148746e-05	-0.004637774189766297
20.761	-0.023026769628308408	-0.014893742359322282	0.08887305930533174	-0.023717989561268027	0.023530516590145822	-0.0888855369915813	-0.004562644437935859	-0.03812046264500246
20.76	-0.005043414176276961	-0.01909651982226901	0.09150448267161337	-0.02566950452386063	0.02797016974002453	-0.089019153464303	-0.001419847509993133	-0.0193539395750717
20.759	0.009963663567226888	-0.014630836269291514	0.09356712362705721	-0.02633555513093455	0.029826381980313066	-0.08791270239113569	0.005995661380267414	0.004478075383235414
20.758	0.008228777927492992	-0.009848507164436526	0.09047889307321988	-0.027352408378966686	0.028198136001908125	-0.07505871320800406	0.0027063913117650884	0.014646178251213726
20.757	0.014012336035231776	-0.012149824949260868	0.0865900971480924	-0.026705285914728982	0.02537585895085126	-0.06750574490395156	0.0008272220590237467	0.01961743636623403
20.756	0.008110790483016217	0.0009808194205174203	0.0849284025198127	-0.024858197758783618	0.024338539951119564	-0.07095729725089672	-0.00044875551870404706	0.022543057364785568
20.755	-0.007270891633536003	0.005061269931767143	0.08145142293320173	-0.023402583295975	0.024135227210853927	-0.07157402938093238	-0.004333747500054663	0.008400415765379421
20.754	-0.012044370188104558	0.013866594199955173	0.08342422763746882	-0.021414801280771556	0.026288956950305753	-0.07838586934329062	-0.0074628632483353385	0.011734737975563014
20.753	-0.006924792841934924	0.02063104720397213	0.0856576401600826	-0.017917695593560268	0.02637246969916518	-0.08164965826159243	-0.005873145154972725	0.026169010366132284
20.752	0.0026938576526838176	0.015170913073245806	0.08452987420023561	-0.015032549709486531	0.02794453924369833	-0.08267360137677837	-0.00044174774201000133	0.03263303308359866
20.751	0.0037177126747351963	0.012736391131685565	0.08653644262830884	-0.013281371746154846	0.02931659879793802	-0.0805847079727835	0.00591869159883629	0.03844106551372928
20.75	0.01237809357775177	0.011412450161524923	0.08839461326775933	-0.010823633735240534	0.03411538745936138	-0.08057346189310888	0.012320596025054975	0.054903448838047986
20.749	0.014769947934291316	0.00813517737743119	0.0884285614989393	-0.010008044294652407	0.036052578715444206	-0.07951369651341533	0.010524027158302474	0.05786452471803827
20.748	0.018433875331618665	0.005380834704955539	0.08641610026879132	-0.010351239685525648	0.040915414417635354	-0.07680488045375711	0.010682514941028565	0.06399010458371812
20.747	0.013980937514836533	-0.005034828912173772	0.0882980565811673	-0.00870818184945854	0.03902696866758415	-0.07357980346591209	0.009385066545640086	0.05398314853604358
20.746	0.018482353457465628	-0.01577534900691191	0.08814561205881866	-0.008628949913580541	0.03977175033791003	-0.0713029488931678	0.00950646459452198	0.05069246804053407
20.745	0.0072283773685652974	-0.018084579088063713	0.08280919303522793	-0.009594704595466297	0.03851547984517545	-0.06454586710373356	0.006729194031334096	0.036327899461705115
20.744	0.011833007426079512	-0.018401062518103473	0.08292860438234495	-0.009430570535056582	0.039242581288505995	-0.0652035782714595	0.008004241388185562	0.0409689817723109
20.743	-0.005382142256070921	-0.022763225974213874	0.08184982180875	-0.00831220377398978	0.0353108801229407	-0.0592753068923928	0.002887698133529959	0.02142782303502333
20.742	-0.006108691274826938	-0.02007608989038001	0.08105782195986233	-0.006971223520648273	0.034623953995884804	-0.059418827774367244	0.0021838400846592165	0.023106943495524668
20.741	0.002153626927354324	-0.02555484187192114	0.08216322622158412	-0.006747788641788155	0.03563916854461713	-0.05998212022817295	0.00345095340491941	0.02767127095167332
20.74	-0.007164111333376688	-0.023135879992905117	0.08243602492446822	-0.007454945746315111	0.033678646082504926	-0.05126609827720596	0.001826547423535274	0.027093635657170267
20.739	0.006252045122434602	-0.022589557094466528	0.07828307190108053	-0.008874620402042233	0.032618233457888834	-0.04766215926459427	0.0033182927823958153	0.03802701372030093
20.738	0.004387910451680632	-0.02270196840500205	0.07360415892192673	-0.009596893993026434	0.02850907097650257	-0.041926722930210936	0.006862733523098186	0.03227555502187052
20.737	-0.015629859133273527	-0.039649491990525476	0.06857419111923768	-0.011584493586891398	0.02254215041116936	-0.029009012158800473	0.0061550569801109845	-0.004756515339083833
20.736	0.008519999639178266	-0.051178385902885815	0.06426855410792598	-0.012908048674938222	0.026405426976329416	-0.023837011825751375	0.011975183838782932	0.01127053431985825
20.735	0.007109152512837724	-0.06133698565443968	0.06473972909716519	-0.01402872455758608	0.02521929544909174	-0.03709422162260001	0.014539701188819976	-0.015391754775531119
20.734	0.03465487260564437	-0.05872037640757277	0.06532401245934594	-0.01497935727114097	0.027537745823877025	-0.04764835551036395	0.020639026532061067	0.0061685416997896425
20.733	0.05891962162075526	-0.06714725507279606	0.06228401256251459	-0.014484274961061416	0.029682941313859068	-0.04890112608874109	0.026628428564966278	0.02035391937453035
20.732	0.0655919838219976	-0.07236622256129621	0.057117342359196854	-0.015379943298477805	0.03175045432359802	-0.04277965928482974	0.027632812992300693	0.02393395536018872
20.731	0.059204746015487864	-0.0705864190400236	0.05404464177421442	-0.014258988817902996	0.03183732035670417	-0.0387654096181036	0.028596537867254135	0.021475890670376252
20.73	0.05372191552268557	-0.0659284457240652	0.048594181557113814	-0.013622416925335834	0.032800911529273336	-0.032056480477573146	0.02898030563179521	0.02350966548209854
20.729	0.033334028655668924	-0.06856916190286899	0.044660105130422956	-0.012572575271075692	0.028958059809695236	-0.02525461812342833	0.029346475508326364	0.0005558382984141019
20.728	0.029072134996789956	-0.08182637399982085	0.044642722100316945	-0.013709977931332773	0.029426328949584857	-0.026858510473855013	0.02831280385664492	-0.019253676358316874
20.727	0.01782820580897848	-0.10055309913734423	0.047763592694755275	-0.015450879939306716	0.03201403743219178	-0.02391645893810246	0.0305704734865202	-0.04231460207882787
20.726	0.006734560822938107	-0.10660734855219278	0.05314202971656812	-0.01664914910219295	0.03440470098670456	-0.023794116232826568	0.03271834444730537	-0.052769322361001514
20.725	0.0004693342641086673	-0.11922064599304161	0.05359153323374333	-0.01824036671867635	0.037403382295377874	-0.013914087653731144	0.035321601884758635	-0.05991085057221923
20.724	-0.003926662442638396	-0.11710581274174903	0.05447730008997986	-0.01821870650037649	0.03689474850868635	-0.007363953775376686	0.037603778248284314	-0.05524308686147439
20.723	-0.012694482117463934	-0.12416657881222815	0.051494232489038616	-0.018955679081742005	0.03353314666340701	0.007974371544038128	0.04062324235752168	-0.06281498931495033
20.722	-0.019607635969643766	-0.12917373248758945	0.05035220518726646	-0.020174731568718407	0.03451824296707695	0.014096632919775587	0.04132938357607863	-0.06998901895183263
20.721	-0.03074256794549335	-0.12898096172060658	0.0484049676460403	-0.02126412895503549	0.03559890728381898	0.016287003543150824	0.03855785388013544	-0.08069678014812531
20.72	-0.01798500509496037	-0.12704313644857645	0.05041705122391171	-0.02126543628109623	0.0367074611060092	0.01161758278521674	0.03899798602617377	-0.0675514827094954
20.719	-0.012239294091266117	-0.11855836976772771	0.05158917866584822	-0.02138387982368517	0.037008620615730514	0.008958853955530977	0.04133281885292739	-0.054624890445569285
20.718	-0.00858068161729264	-0.11343544322885002	0.05114672321328584	-0.020822751673446938	0.037658356946227656	0.006059545143891398	0.046460187078161574	-0.047974251216184705
20.717	-0.010291011571409214	-0.11163193746966638	0.04802734080321347	-0.019781269484240305	0.038840515366750594	0.007888429189596202	0.0504166643948043	-0.04694793316575563
20.716	-0.019790692592798642	-0.10683085308851759	0.04146779311197868	-0.020214991472786714	0.036673389717799765	0.018116665030728285	0.050854623026809875	-0.05057868929359621
20.715	-0.011515331117490923	-0.09605526241022844	0.03874901597745595	-0.01878236908151365	0.04138755799921068	0.0194293579344178	0.05465697325630181	-0.026787030698148584
20.714	-0.009675400578841753	-0.08925447970965816	0.03713939304607994	-0.01620120802839775	0.04324814712578462	0.023644924821547342	0.0576466043800723	-0.011098623323485768
20.713	-0.03539976506819187	-0.0864857858736281	0.028687274309454835	-0.013173174410619382	0.04011104661717546	0.040450039500046664	0.055099453714984925	-0.025810364925762386
20.712	-0.02241360049796448	-0.08533071967021044	0.02152971601051945	-0.01186908512156215	0.04054710052898791	0.04705049331796474	0.06009528079209758	-0.010486095432264975
20.711	-0.02730327903708929	-0.0873414771140073	0.01656380432053073	-0.012169937699987088	0.037854405942890246	0.05750819249563488	0.05848721282104474	-0.014888291092027828
20.71	-0.03316887789403733	-0.08988244161501324	0.011019553488705647	-0.01187742188900831	0.036146738199271056	0.06966492134163271	0.05661341073156212	-0.018097528368449467
20.709	-0.040392626804639065	-0.09912539313939384	0.009185511592457729	-0.009981641060487156	0.03569300330180791	0.07435516901603556	0.05529295723058958	-0.030265977094218854
20.708	-0.05069634732831574	-0.11033331574056149	0.010848712898704704	-0.008060129393755666	0.03564665637848918	0.08160697917429616	0.05398562858867084	-0.04098744401114285
20.707	-0.032051488193960864	-0.11308256730559485	0.013173342528622456	-0.008543032804917416	0.03856803986379109	0.0815504951260122	0.05767581895861884	-0.02038521078604738
20.706	-0.04056610654498982	-0.11289008809523082	0.013428538595205985	-0.009817380447482371	0.03509217674788001	0.08753607810819997	0.055234089729075286	-0.027216781636417053
20.705	-0.04974384381051955	-0.11682506749766741	0.009702224397293513	-0.011912459135393405	0.03049671563753975	0.09640117969177453	0.05290149099474917	-0.04188125071697257
20.704	-0.058170238848379796	-0.11812387069081431	0.006890819396158321	-0.013738296181735166	0.03203606160907668	0.11237644978408934	0.05093169435633893	-0.038729074931604934
20.703	-0.05058948621459436	-0.12306207339573128	0.0061132200017830485	-0.015188069499910029	0.030853202575939598	0.11640604139949762	0.05150361725744368	-0.0354671651330154
20.702	-0.07137223467411768	-0.11447195213698258	0.008702975727120865	-0.01579919898646498	0.02795560134011499	0.12083683567104142	0.04559390269930663	-0.04414797305928797
20.701	-0.07058072956706152	-0.1292923079719559	0.014816883674590997	-0.015117252729877073	0.02856829321446508	0.10740383309590396	0.05026083618499211	-0.06420128028393446
20.7	-0.08271174827709427	-0.1396761563499611	0.015188011991519978	-0.014905730113731863	0.026783802274647606	0.10903809517414853	0.05052999790068835	-0.08628372530047113
20.699	-0.08129916022683936	-0.14163244480536186	0.01858430952986545	-0.014825860559665394	0.02626618526198765	0.10511044221691179	0.05170233236009736	-0.08779652858310172
20.698	-0.06821183042048151	-0.14251653101507777	0.01867738299114663	-0.014422978311400492	0.02676555727739416	0.10320257320630777	0.04946687015283313	-0.07650582627211122
20.697	-0.05911838415101034	-0.142151322602027	0.017619867158114033	-0.014878576309981462	0.02624335439558223	0.0993787951660039	0.04896127723599619	-0.07290626634331865
20.696	-0.055724693153293536	-0.1491327554295463	0.015652579368488517	-0.015326122486096772	0.023409119032763215	0.0965797766661094	0.04674998384254092	-0.08454209600157547
20.695	-0.05149738243814461	-0.15423032876018983	0.011251045186324582	-0.015331595189100433	0.02344715969835054	0.09530774766244932	0.048801995756688754	-0.09105335384031044
20.694	-0.05859641365366475	-0.15418298746109027	0.010029973893884048	-0.015887848487319722	0.022449066300324283	0.09457024386730328	0.04534490979506778	-0.10161796554056313
20.693	-0.04798741801833106	-0.16577705844055046	0.0066025886732443695	-0.0160582722809135	0.023406479470454045	0.09593476991629668	0.042888941304729755	-0.10387891067979993
20.692	-0.03549383871577394	-0.168332902792117	0.006936235089862741	-0.016440596897419724	0.025047914079307176	0.09165044762708341	0.04217569715963876	-0.09663274160905733
20.691	-0.012159088288896669	-0.16479994357367111	0.00819920449747702	-0.017128120892094145	0.026342777548958196	0.08741598485558821	0.04478410215071271	-0.0721291858526385
20.69	-0.0041519483815939395	-0.17294696938855392	0.011121561430655014	-0.01833387256695662	0.025705879959509126	0.08690769903404938	0.0470732904335982	-0.07169764991289096
20.689	-0.023042713150189797	-0.17032074159429467	0.010665666325634149	-0.019619514113177416	0.025919888977979255	0.08907442607088889	0.045669122479186974	-0.08732298748315959
20.688	-0.04152340549681366	-0.16517144866077427	0.01310741419285133	-0.018973997555153943	0.02349177634586308	0.08792950504309172	0.04150803864756103	-0.10114015613093574
20.687	-0.04814797501161294	-0.179191771291503	0.011346628742519904	-0.018603786214778317	0.02147756889072383	0.09300658049093347	0.036879404666401605	-0.12011275439371705
20.686	-0.048426722990511095	-0.18809688994798712	0.013083703360952548	-0.017163315403572632	0.02051327509424361	0.08583658993971355	0.0393081054270219	-0.13425335994716114
20.685	-0.051370069583717815	-0.18587031069136817	0.012904429871588796	-0.015348678387076653	0.022941710624249545	0.08075925235140513	0.039110651368087446	-0.13598366581491916
20.684	-0.07064574325264061	-0.18985244575634486	0.013046453536230906	-0.01471732775702872	0.02149416015749228	0.08541084068362892	0.03653121857219421	-0.15526406238866208
20.683	-0.05541287325106481	-0.19084754814164473	0.016540847579180173	-0.014937483686938258	0.02535889216589471	0.07338103433088072	0.03968970533138627	-0.1459171310036922
20.682	-0.06228390540092743	-0.18016622681883376	0.02200582462110212	-0.016373088589901386	0.026820027450957795	0.07262067440355491	0.03587485301280413	-0.13737669433404776
20.681	-0.06418761010599283	-0.17303419158350142	0.028397231159833503	-0.01668404945903479	0.029983064889605338	0.0632216284506022	0.03487625838072006	-0.132303926648488
20.68	-0.07324457263969375	-0.1617084940849569	0.03186058669226277	-0.015773780187334552	0.03033262452260921	0.06055766705835719	0.03421171592404981	-0.12797596863875604
20.679	-0.06794983892468665	-0.16593349228311904	0.03625089030865869	-0.01586573656117274	0.03056424230181598	0.04723975670372749	0.03512124925708715	-0.13569417845477627
20.678	-0.07323336443717743	-0.15322635031301424	0.037377430301514636	-0.01650037655979464	0.03101150175528833	0.04305804927341228	0.03350991418463156	-0.13151310997977106
20.677	-0.07167927550258923	-0.15173637555180086	0.036763462621699716	-0.017431767308960566	0.03155101880531941	0.03834226626409354	0.03322800882895649	-0.134190670672238
20.676	-0.08199054306856546	-0.15438304572648942	0.033866682317125196	-0.018183324573719517	0.0315828101545943	0.042376015695039904	0.030102202474045825	-0.146731405202015
20.675	-0.07396243235286182	-0.15600936688076317	0.03293510874526362	-0.018870404268519714	0.035083326060612485	0.04031272636223626	0.030527694044940823	-0.14051104233403233
20.674	-0.05889225838607892	-0.16052163389110774	0.034818700029422445	-0.01938902049787483	0.03664038327917929	0.03259384375368857	0.03184474895071965	-0.1347499857127712
20.673	-0.06793210119936965	-0.1618998771993132	0.03127155660190084	-0.01919826688371984	0.031559222847968194	0.03551993805881981	0.030258510494118873	-0.15067952777371385
20.672	-0.06929562171861381	-0.1565070616303057	0.029162056240219947	-0.018697795045742538	0.03233049221109141	0.03230513149260705	0.029295501010798475	-0.15070279845074364
20.671	-0.07071352070609915	-0.15923213641267875	0.02784370659491664	-0.01915194159464484	0.03157287951292531	0.030596926311243777	0.028632335975816936	-0.159084086294337
20.67	-0.0703611422304764	-0.15717690775480175	0.026758759753952255	-0.019980965678236373	0.029043565625855194	0.03390040458104426	0.02483378838938677	-0.15781628570266282
20.669	-0.06802070247112457	-0.1382875202769407	0.026367051889904403	-0.01937144529448709	0.027427763328335075	0.03009121713463614	0.02234591320222723	-0.14179363568967673
20.668	-0.06758566376113162	-0.1299729927300861	0.025167023388734222	-0.018572609061956236	0.025087486499205447	0.027112943719439286	0.019911472184340973	-0.138763811945795
20.667	-0.06384958565998478	-0.12564612543831988	0.02481766042272504	-0.016584850211681434	0.026180889348927927	0.019753898341152265	0.022352960431066826	-0.13532811319718085
20.666	-0.07577634933474986	-0.10894323012120832	0.021431960076323975	-0.014196273050623986	0.02535334303138459	0.03075425609854321	0.020887901565335376	-0.1213762933003304
20.665	-0.08185390854663321	-0.08770967960136122	0.019602461471662558	-0.01240789359627481	0.023485305910509346	0.03517951484295612	0.01868900361550363	-0.10370419951914123
20.664	-0.07922381586561134	-0.0835617301274647	0.021030374491338932	-0.010782366757331907	0.019253195279740787	0.038749324564645526	0.013692094140345112	-0.0945350184146827
20.663	-0.05148075315548173	-0.08124214217910097	0.023163193601395626	-0.0073444101549045016	0.019834995294112368	0.028121275709434457	0.016370173025366697	-0.06894784088454475
20.662	-0.05058372572385039	-0.07331512661999984	0.025990925385895203	-0.005486120522001592	0.01889546403763287	0.024128145821922686	0.01658012134195541	-0.06037043762040106
20.661	-0.051990511579020016	-0.07869118966795252	0.025590467581641185	-0.00488355412410435	0.01812751499268561	0.026176430474039947	0.018884500336542764	-0.06567084232271014
20.66	-0.059412015559890285	-0.07108572005293556	0.022209198067995928	-0.0031153092215854272	0.019131189616489408	0.025750369673446905	0.01893812730472	-0.06652228747647904
20.659	-0.07290764537126293	-0.06126631805226257	0.01910288597674281	-0.002065365989424528	0.01692449133428031	0.03136751505951629	0.016401925935307204	-0.06884443704241061
20.658	-0.06360435972054646	-0.06525274825639205	0.015185296326170494	-0.001958343880624547	0.01437983059188852	0.036064280137748206	0.01391368890957434	-0.06518604480175583
20.657	-0.051865933245447415	-0.07634492400213322	0.008401068476368678	-0.003822347662340242	0.011795173284921745	0.04637529977170818	0.0156844326210015	-0.06546166337692227
20.656	-0.06310979946029249	-0.06601124041924766	0.0030579689772354257	-0.005905847638064898	0.00934134682752763	0.06392063332967624	0.01175978849589221	-0.05870693838316576
20.655	-0.06998839662913259	-0.06708551454785638	0.0019098255322465008	-0.009345583154197534	0.008175492100685133	0.07177385871940078	0.004519913350185867	-0.06456031797885409
20.654	-0.05412509178779423	-0.06735781161893328	0.0031697055674611008	-0.011967217649953454	0.00867256991785137	0.07477208933268464	0.0021579723936859807	-0.04683575623868386
20.653	-0.04339292458962518	-0.07200195530886955	0.005728436445834539	-0.013519496388541441	0.006811773400924537	0.07186831389773918	0.0010865584269810213	-0.044505852542537916
20.652	-0.039786192194880776	-0.07077548278669443	0.002643027819878796	-0.01560865572637482	0.0018255298631206784	0.07857593849960587	-0.0006054548432414819	-0.043125834525344686
20.651	-0.014100865885142255	-0.07013581413561454	0.0011877558823316647	-0.01596923592599353	0.004140834212902789	0.06515025339838232	0.00705157093450115	-0.02972707245313355
20.65	-0.02478437839043579	-0.06001968049444528	0.0005742170400013791	-0.017062683874030427	0.004080801456621153	0.061551526996166395	0.006064240557090095	-0.03566019726612257
20.649	-0.013662917770221661	-0.05372695235884706	0.0021089499374475906	-0.017678928330730592	0.007772914336094061	0.04200478866346202	0.008964461010504188	-0.033182145522795636
20.648	-0.019269377000822097	-0.03484395015609465	0.002916547202139519	-0.017645569854155774	0.006284573486607492	0.04190857490433153	0.00730859470917089	-0.02064920141799398
20.647	-0.008015384849140439	-0.031191974100664766	0.001985648488322056	-0.0176318736527179	0.006594570343776418	0.038642773023123134	0.008763872524343519	-0.009616240747301497
20.646	0.000716108832813589	-0.025916084155097607	0.0014784025458052241	-0.01750759773494881	0.007792035023783228	0.02894352501956199	0.00849187483420355	-0.004493610468082387
20.645	0.00021850926435718065	-0.022321174279057665	0.003537816632823265	-0.015286706732660527	0.007305893287301579	0.020889784342211115	0.007837163573532813	-0.0056558774850250515
20.644	0.006038167785682447	-0.011511410750768114	0.0020094292562173877	-0.013463743563491448	0.010126644673924545	0.012509497500666988	0.010099613836096033	0.005708584902231806
20.643	-0.022335355528960932	-0.002182234673061778	0.0019859091525527006	-0.01104725910838944	0.008264917176969533	0.016315654951834624	0.006556645422423735	-0.008998368029055293
20.642	-0.026799974339420274	0.0058317651526875736	0.0062706766699553995	-0.009267310797352657	0.00940983112752658	0.010632636687502028	0.003022959223548227	-0.003922375499101349
20.641	-0.036879090126529235	-0.000704569677725253	0.009189656312195815	-0.0075437762070835745	0.007887987881481706	0.004413003863256826	0.00026158575080437174	-0.023636787954403715
20.64	-0.02833393712097454	0.009341526564592861	0.01004528880287392	-0.005951083738285234	0.0069566334365989135	0.0026792918996232373	0.0032841446171234523	-0.005262280155570842
20.639	-0.02917265649697587	0.02644559406638436	0.008997506405953537	-0.005372626756888543	0.007108655913659945	0.008280790259026283	0.0023937844949379894	0.016287263391159712
20.638	-0.015774546730425776	0.026884339564085202	0.009096565782222399	-0.004832641701064233	0.007956842627246274	0.008833977796536274	0.004618806911773632	0.03216453733860014
20.637	-0.02213236531896179	0.02588680396601628	0.012316456911289464	-0.005147764829396273	0.00878730142483608	0.005811345306399041	0.004225410169637733	0.025521777460182804
20.636	-0.03786705263798584	0.021763204071068465	0.013060681696348553	-0.007665396466289387	0.004022488444548777	0.01256065644649862	0.0008753248630384292	0.005874581554189184
20.635	-0.033114621770831576	0.017473937167238773	0.017947291577601554	-0.00897079266516343	0.0021817486373860717	0.007008393561763526	0.002238823996467687	0.0025259565079949198
20.634	-0.01734576222054507	0.01856607492972895	0.01926952907662738	-0.00851807877631039	0.004133635195879393	-0.0008066802234463211	0.009338384352841622	0.01529871798193394
20.633	-0.0353317391268515	0.0262746640987217	0.019227744998446816	-0.007990895250989283	0.002565016020151134	-0.0004974518703617647	0.006701540929148209	0.004247338869117101
20.632	-0.03376215621291223	0.029458140005541367	0.0166558718371439	-0.008028994925234123	0.002499798382062046	-0.0018639513170164435	0.0074486839787653025	0.004958707769584514
20.631	-0.01965569060028649	0.048789800772535585	0.018187046679118524	-0.006473527892131514	0.0057246079518877835	-0.01955868176589881	0.011665544957142338	0.027013555145225077
20.63	-0.009959367641892314	0.06827826924393854	0.020567601859815987	-0.004008806242364216	0.009923417659495115	-0.03973239872662493	0.011808509485553564	0.04506871615236818
20.629	-0.015473167467509263	0.06083687993670228	0.024485956912873696	-0.004224189085346275	0.007005127516880094	-0.04740532590516544	0.010044909652828338	0.025225281908435093
20.628	-0.007256028556891891	0.06199429064014783	0.028961571111689288	-0.003807797624949316	0.008694490434544733	-0.06847477342591546	0.009085071159560698	0.020111752578625186
20.627	-0.02551857130785784	0.06099874922425208	0.03068836670939934	-0.0036150384245177136	0.007946503590908982	-0.07341083266848702	0.007609578907520564	-0.002910822876302177
20.626	-0.031199715411266205	0.05925759557848931	0.03271514067946146	-0.0031377628335302887	0.008213740372302603	-0.08080761450025165	0.002311755349819755	-0.014958616114794765
20.625	-0.02463370216172045	0.06038636995198132	0.038878168099314436	-0.0025640547677046044	0.009127652072012715	-0.10049139451519196	0.00579180591895323	-0.019296961321308537
20.624	-0.016324974685667293	0.05740660598798897	0.0386962058860405	-0.0024548314352346168	0.010108732702446943	-0.10162345210678492	0.010100867629919463	-0.014191713651210414
20.623	-0.02027211280627661	0.0543428904853549	0.03808491742550846	-0.002271547625827708	0.009391036892285598	-0.10650223574681661	0.013469705505817053	-0.02722705137577197
20.622	-0.026864283784431287	0.06393058860530143	0.03585133598839807	-0.0023276553438043024	0.0074747744195615695	-0.10957288492985562	0.011138296755881072	-0.03150812504483014
20.621	-0.046278683752782435	0.04932987554127255	0.03821747388180974	-0.001963038189306765	0.005840190623907837	-0.11201746021249548	0.010747623849242771	-0.06687164210759455
20.62	-0.05685497834685549	0.042703798727073305	0.04275305924113848	-0.0015972065998681728	0.004768171130564269	-0.1131245533912697	0.009366860608987615	-0.0813517092392173
20.619	-0.06406140431025165	0.022839084001430088	0.044161869128346964	-0.0009921191641337757	0.0014019463055321424	-0.11128708786749453	0.007610041940837142	-0.10793771190657075
20.618	-0.07614068472669189	0.013056538188396694	0.046891272661931716	0.0009112340689743093	-0.003769712394466218	-0.10244666451097029	0.003319970237606107	-0.12149801671282567
20.617	-0.058416833206017316	0.004299750571440164	0.04980131388693021	0.0036954670111004617	0.0007263027358543894	-0.11522488164327704	0.008122479901175872	-0.11511888064396913
20.616	-0.05323133809279312	-0.0020403051093031976	0.0521146049837764	0.004492599110842654	0.0013738102416116504	-0.11777833260599646	0.009950259420742569	-0.11506896147186207
20.615	-0.06408067977390974	-0.005601624330568988	0.0533555247155002	0.005110264809221832	-0.0017584571199718013	-0.11242237981699432	0.008560029567650673	-0.12539735151672282
20.614	-0.0486995147721867	-0.008062280847564551	0.051937131071374765	0.005762177336518626	-0.000773190271565305	-0.11329980857317423	0.00816830813086078	-0.1131354860565974
20.613	-0.05673168730607259	-0.010418338781859049	0.0534522950872125	0.007685505230451639	-0.0023308229654110946	-0.11154545050362952	0.005387632596573155	-0.11988849923930811
20.612	-0.04394405764806297	-0.015218352610411934	0.052895610771146906	0.008704079484493477	-0.0018639750727045268	-0.11737405910991416	0.006158733660657667	-0.11680075418545321
20.611	-0.021981728976917303	-0.02587246048883607	0.05504500448873095	0.009945984879222713	0.0011534531117183278	-0.1311961290130519	0.014303227089364157	-0.11290587599913326
20.61	-0.021573685603569537	-0.013789642372739053	0.05689729871256066	0.010915361433329274	0.0033543003070546362	-0.13420688927748436	0.017893711768598664	-0.09840325680084838
20.609	-0.0162773475158291	-0.015381439694074572	0.057461521280315786	0.012711329117192527	0.003806543445980637	-0.13956164545579952	0.020826852091772707	-0.09724103882221424
20.608	-0.013345445939225264	-0.007811299398933436	0.05787095483520144	0.012278207707916877	0.004840496690687424	-0.14600127126444384	0.02025079616328984	-0.0921683573687968
20.607	-0.028586920181749242	-0.01626100562965682	0.05512067448729763	0.0102369986752473	0.003268392871298431	-0.1386191055601289	0.016261430688080836	-0.11484096533769161
20.606	-0.034717867979060735	-0.018011865844017372	0.05031828151126749	0.008254401789191235	0.003496768660218308	-0.1235086122484299	0.014292861974082527	-0.11416889411083098
20.605	-0.04838312411785495	-0.007284489368882596	0.04895599956393237	0.00777747266675366	-0.001355622243822019	-0.11375092882797677	0.011125473576394818	-0.1140406923278503
20.604	-0.04551285467220545	-0.017439195684770148	0.0472670769591641	0.007927642851013772	0.0005485968709235678	-0.11448395525738686	0.009574151465088221	-0.12169268893326102
20.603	-0.016425864551972147	-0.029427400945254867	0.050902836216244474	0.008969435722053554	0.003925525993567547	-0.12318554554982164	0.013342268335617469	-0.10524101311518308
20.602	-0.014518149929589441	-0.024349607557780928	0.04945058734779284	0.008444449266827192	0.005360824775778816	-0.12061752324891462	0.014053159164568285	-0.09622941934588614
20.601	-0.023990119820064493	-0.03348851078374704	0.05263186578693091	0.008134502346490713	0.00263804700468917	-0.1172988493966125	0.014421079257584069	-0.11137306486231324
20.6	-0.03211054759597598	-0.03702054811952671	0.0484442884430889	0.006491834405761843	0.0008706370011140052	-0.10223983109361079	0.011982651348993123	-0.11556416695914873
20.599	-0.05519421576326877	-0.028190769225458823	0.04365357743535192	0.004816733195693423	-0.002570528822841922	-0.07912286500059729	0.0057358587419944485	-0.11660806818112146
20.598	-0.048507480155119964	-0.020289217205042398	0.03878829720621901	0.0042495079406768	-0.0019174078281265494	-0.06676308709773782	0.003950333134820738	-0.09443938713913091
20.597	-0.046421707648369726	-0.019880195290078895	0.03479070176047472	0.002849119449304993	9.606292807617933e-05	-0.0527790156441883	0.007721397234525362	-0.08134503444478103
20.596	-0.04255185033357023	-0.02813284819711459	0.03403753139866961	0.0025865328252239195	-0.00034645019970547253	-0.046218857974753114	0.01065167059674188	-0.08062594248124988
20.595	-0.043675144268847	-0.030804317628654765	0.03606887686154536	0.0012830606260036959	-0.0001961411048316819	-0.04392583199302713	0.011153778705656592	-0.08124949750781152
20.594	-0.0386348351966026	-0.03714799418389081	0.03843667687177277	0.000551434790120986	0.0039755808967765205	-0.04400419380493403	0.011917616494554473	-0.07682333062675717
20.593	-0.05401496903309155	-0.03634411698547968	0.040150718471057445	1.0865097120671408e-05	0.0010809839689098766	-0.04509453774611938	0.005925288138276308	-0.09421105622760262
20.592	-0.06667005202594023	-0.041600403974277	0.04067880892405551	-0.0005575666725139428	0.0006072264868395294	-0.03851865455791348	-0.0017077024111884498	-0.10606064181974961
20.591	-0.06890579736819813	-0.05065876483387122	0.03960481059030663	-0.0018925942513678962	0.002178156395623354	-0.030718981402753087	-0.003167722492380065	-0.11039317087026035
20.59	-0.05549526077954425	-0.05233666107614621	0.03894716389188968	-0.0030665777765905844	0.0048610684602641285	-0.021952647027557504	-0.004728162892298826	-0.08904291430768474
20.589	-0.06450801709850484	-0.06387795056237877	0.032250948401390644	-0.004722149216913607	0.0022132438800053222	-0.008129490089231695	-0.011539146739202089	-0.10677341468563295
20.588	-0.05803353005464196	-0.06512022235196202	0.02665537597225054	-0.005071858165597298	0.002149729426233371	0.003172403780557609	-0.011158654508630406	-0.09624810139315976
20.587	-0.04467371415929744	-0.06928958614945024	0.020348784550070498	-0.005579823114176818	0.0053617632246742986	0.00828294166742971	-0.008720149659041887	-0.08554963398075
20.586	-0.061989779026641045	-0.08052471487016621	0.016595663826175944	-0.006608419063538484	0.0009211766816203948	0.018607486762747705	-0.011726013291476711	-0.1129985856898017
20.585	-0.06168958108055911	-0.07957880224195435	0.015584407344976015	-0.006370405580691241	0.0025454146582362114	0.020997802449839398	-0.01280368390152109	-0.10851116445015307
20.584	-0.04239904808136963	-0.07588986964584343	0.01869017798076733	-0.00633462757250669	0.006073209634377186	0.00979925128421133	-0.01066871631445565	-0.0900609064003639
20.583	-0.051520996586900125	-0.0706034494591874	0.01904465352978324	-0.007220760179020402	0.0041737054531445494	0.011425907224502652	-0.011717195950529558	-0.09470094001767748
20.582	-0.04358109419454248	-0.06765024543309206	0.018657434082088642	-0.008995206304421188	0.001618740323965362	0.015374004897766191	-0.012105025892861221	-0.08457636662823553
20.581	-0.03575161560472839	-0.05847961939491331	0.018631984571602977	-0.010507804038287105	0.00278817997632963	0.020318360339325103	-0.01309582361269701	-0.0630005141506711
20.58	-0.04701871263636814	-0.05909907581338203	0.01566895117368272	-0.012703814532255997	-0.0014843379946238855	0.03145584353930708	-0.019967087231881564	-0.07318114626364025
20.579	-0.060733386872589	-0.06860303946006763	0.012379382879937673	-0.015536000353132629	-0.005635318358478969	0.04287838900336283	-0.028091269860558654	-0.09524997316096773
20.578	-0.07853374727060025	-0.0718840338763318	0.008729286504071787	-0.01892062183953147	-0.007810560292793589	0.04991434337859779	-0.03819452017825942	-0.11850533339658753
20.577	-0.0735052658134725	-0.07860878901308954	0.009071572850450238	-0.017451127424261692	-0.007398088567374117	0.05005550397884484	-0.03678418250360327	-0.11783619398890277
20.576	-0.042819014184661164	-0.07602901050140698	0.011458631298238764	-0.014992686494616159	-0.0027904363969728507	0.03589726360500478	-0.03336753706510187	-0.08927525267441361
20.575	-0.02566751293591807	-0.07143435572037582	0.016319457926644354	-0.013174102452600422	-0.0019072493020715342	0.02328694681074417	-0.031050492013002362	-0.07257681567357732
20.574	-0.005785500867258264	-0.06933552414047028	0.01714181230020717	-0.01166626239618651	0.0070728692671275795	0.007695648569786329	-0.02785801090916351	-0.05487695726679398
20.573	-0.02203733148137843	-0.06689511837281614	0.017119366060254215	-0.012081569436186435	0.003079208871581862	0.006751231258574464	-0.03127121242675024	-0.07406421309997047
20.572	-0.0438263231930307	-0.06698156929803023	0.02055003995712923	-0.012361877488158868	0.002818980959463424	0.002861953554532448	-0.03623923422305264	-0.0969387955080947
20.571	-0.05445886808861733	-0.07885781183170959	0.02255481961806982	-0.012597704150189237	0.0015461165988934766	-0.0009209292572567307	-0.03784933738759211	-0.12273437711080959
20.57	-0.06615788005279644	-0.07756046438704978	0.022186379943086365	-0.013936452685697098	0.000572507265847122	0.0007032651215617136	-0.04161361721798329	-0.1341926447950481
20.569	-0.07723457864225214	-0.09722034930844803	0.022001934322619654	-0.014792156954527513	-0.0027508078720233087	0.004115553425351415	-0.04380306296551417	-0.16588040502927992
20.568	-0.04661951513294049	-0.11371874874039989	0.022244094029360895	-0.015980338784864934	-0.005680155057621761	0.0009508053272284656	-0.03887913348579719	-0.15880385835923772
20.567	-0.047718379056126636	-0.1167182980391539	0.019918132004687727	-0.01722658213986694	-0.004983374367038884	0.002920656561573587	-0.04078584361526971	-0.16380784503592505
20.566	-0.038991619964898305	-0.1231551308722123	0.017807738810654783	-0.017959670539122286	-0.008841038835615045	0.00836245816977943	-0.04314971752282215	-0.16277726323141373
20.565	-0.031181892223020036	-0.11489379214973194	0.01737122566379945	-0.01769469307257676	-0.010384602355609118	0.008017578663149116	-0.04454405904117387	-0.1487661754739893
20.564	-0.0013238543937390546	-0.10156401052491493	0.015467372369330157	-0.018063704432051964	-0.007503296191878839	0.010780868975562186	-0.04066433151411353	-0.10220662419769244
20.563	0.001171419939461238	-0.0919504194517673	0.011030023499266406	-0.017217444361744327	-0.012013447779404274	0.014487883827305481	-0.04129068301738048	-0.09449198432688277
20.562	0.01195062344808484	-0.08453249033679011	0.00812433029338866	-0.017512923777086797	-0.012458660897482154	0.017439169475930605	-0.041400711397266754	-0.07698995179395496
20.561	0.019869853695080764	-0.07583160230173736	0.006320162462674972	-0.018146628076568305	-0.01437385740656083	0.015037283728833728	-0.037148896225847494	-0.06712478789827703
20.56	0.029363947559265746	-0.06712970987343692	0.0045523477338305085	-0.018639624381392217	-0.012195288669185622	0.011562394438516144	-0.032754312953096054	-0.052485933192402356
20.559	0.012189599608837476	-0.05105381457330882	0.003832090919051012	-0.018275141435578846	-0.014656070333745497	0.00722525427424614	-0.03376262840363786	-0.060738081540498534
20.558	0.010872471293565944	-0.03488161101331411	0.005574547908122618	-0.018796407912012647	-0.013923999827364142	0.002593586712203333	-0.0336000158562646	-0.048561412838799
20.557	0.012405576116877981	-0.035916629960656365	0.009138553826768536	-0.018774177617467025	-0.011836527531887242	-0.005744368295082403	-0.032721613582268105	-0.05072757346144652
20.556	0.0305672962179786	-0.026815205196632164	0.011935427461000181	-0.01898706445668452	-0.006269541860943306	-0.017442643459171236	-0.02840992642076756	-0.027011731294452446
20.555	0.04217206964784914	-0.014542855430603296	0.013727679845170648	-0.01834437518883636	-0.003470953447606284	-0.027690372515420947	-0.026608623479852156	-0.008148807089447097
20.554	0.05567552049846647	-0.008147958884242357	0.015156856734980018	-0.018133652855160776	-0.0010463144640118216	-0.041664136251645445	-0.022240815868687314	0.0018403147783860874
20.553	0.03797673955228387	0.00957852094340872	0.013112782783863075	-0.016988870668743772	-0.002010546025395854	-0.04163362936035586	-0.021724455252434716	3.4997225060173776e-05
20.552	0.040972937554351496	0.007087919732125414	0.016690601006924766	-0.015457971565148831	-0.0005361699964963051	-0.051882618025094196	-0.019688203718536634	-0.0031253012933376567
20.551	0.04891937717134809	8.50442218061076e-05	0.02056624573000576	-0.014928798127301413	0.001130116159992589	-0.060865180520359274	-0.014562630416306455	-0.005093195364508141
20.55	0.0412633882146789	-0.004893319645724148	0.02163727733333598	-0.0146980738509912	-0.0010194541547816627	-0.06136400195855618	-0.015337725052813056	-0.019074184062038313
20.549	0.05157423814212869	0.01057382980403343	0.022502829691476656	-0.014204784064331122	0.0013946179615045295	-0.06201855994253158	-0.012929843967383725	0.009822171592280604
20.548	0.05204072208034116	0.01670585864961538	0.022630039595266993	-0.014272590661047246	0.000737480509391375	-0.06226479882473779	-0.008507892821972618	0.015576711348829875
20.547	0.05462503410138719	0.009089058924080184	0.02412036380506155	-0.01439399488694626	0.0004727197189282606	-0.06078002586029019	-0.003714802049049837	0.013133155802220742
20.546	0.04956515249802784	-0.0019168322909743907	0.021320847460908787	-0.015581201274601497	-0.003443439444889229	-0.05501317781635606	-0.004959208733269271	-0.00506865086788455
20.545	0.03162784158650034	-0.01047039007855588	0.020868214754441006	-0.017755380876608662	-0.008368431296051249	-0.0369789118402295	-0.007604167893893177	-0.021077057750503947
20.544	0.03207372412929388	-0.010883500526949419	0.014562706633586942	-0.01946501342964435	-0.00989932097984525	-0.020884543582821102	-0.007243209241434734	-0.014495947756379302
20.543	0.016493778626913702	-0.01405211863142064	0.014642242952298545	-0.020827213692617974	-0.014125684723915732	-0.008669642049649262	-0.010279696362122337	-0.02653863751839136
20.542	0.049088062487864015	-0.020634142570666647	0.013859092134933526	-0.01973357772514639	-0.013028669769780343	-0.007280469227899822	-0.003709255135945888	0.0022702953293043393
20.541	0.05574817469875182	-0.019654423023549583	0.007690834085186893	-0.02122204027262775	-0.012220041368611767	0.007326585457302137	-0.0018746704522794033	0.017669089576451746
20.54	0.06900308432881452	-0.01932322491755656	0.004810674971285955	-0.02188567394451013	-0.009343354268787962	0.008183732520924636	0.0015755006730238108	0.03144523869017046
20.539	0.0785692603683561	-0.008629135746975436	0.0019676727003652417	-0.02286957382889554	-0.005969634241648869	0.019802524581967518	0.00245373357549461	0.06287111383316901
20.538	0.10238771140369973	-0.0013846894391074116	0.0020329024704768273	-0.023147996557846717	-0.002849400141390568	0.01444721419112227	0.007187172690687582	0.09148574192695413
20.537	0.09529367047868842	0.0005759311425901359	0.002212935362812196	-0.022648591882298952	0.0017461436798571484	0.004785149747410955	0.0040754367260564806	0.0819652385290599
20.536	0.09763539038907787	-0.008115676098548796	0.0059169296418906114	-0.022327270621551598	-0.0002751903792370669	-0.0033466194679157013	0.00666859172478329	0.06948756346371532
20.535	0.09065057444992597	0.0034086713000531788	0.009578376218923879	-0.021586129310171565	0.00040719907635367036	-0.010386954988533148	0.0044483871654144025	0.07207173674655198
20.534	0.09705870110032144	0.008158038993475003	0.012338995253143636	-0.021788294423136456	0.002212545375939179	-0.01745789910682216	0.0032305061467026164	0.08052208719292064
20.533	0.07837099941029013	0.0016117751400441804	0.011020624154424397	-0.020516005712653218	-0.0006317754514650886	-0.028283105184116586	0.00015191877211329086	0.041572512356523816
20.532	0.07972736466325347	-0.004407021012793777	0.010359287017541519	-0.0213510624366835	-0.00347199456757874	-0.030444404676940096	0.00043682798512278964	0.030412168986798882
20.531	0.08256291975853536	0.0038587126858233844	0.00977400693665853	-0.020614707588684666	-0.0029815479042945014	-0.035826552727443506	0.0055202699198471095	0.0367728311605946
20.53	0.08515645427384122	0.01583871757018862	0.008069097943530501	-0.02090529986563272	-0.0025667538795302036	-0.03760593310160232	0.007125734124540983	0.0479862829407951
20.529	0.09648645732284944	0.01938153471777948	0.002559959309413884	-0.021118286156517563	-0.003903058617352073	-0.031533595601075604	0.006252449249513958	0.061873010975097564
20.528	0.11200585773630056	0.004382439841779551	0.0001850108857865962	-0.020673643817906928	-0.0034739953225466635	-0.024250150664663295	0.007365613758274492	0.06817551865874982
20.527	0.13186108175504518	-0.012556141114958841	-0.0006501643360996567	-0.018396219058067764	-0.0029603622941465346	-0.025354556587432242	0.012193672983349835	0.07194363836434015
20.526	0.13176337505737656	-0.014502884593457388	5.419696451802736e-05	-0.01800152490849083	-0.0066569153580351426	-0.028188298318011284	0.011391734937373776	0.06446794884389995
20.525	0.11313130985316988	-0.020491718231827605	0.0022948324643854434	-0.01813761176917339	-0.011001839497514432	-0.022236748237131287	0.008528879691096947	0.04355822458190861
20.524	0.1070109858119821	-0.026678925601541614	4.081079349838035e-05	-0.020037596056295293	-0.012377000310721087	-0.013655483239435995	0.009220738897879777	0.03430279139748649
20.523	0.10644127617866239	-0.0376565197262444	0.001178908566049408	-0.020732858343119	-0.015774817057473633	-0.006169224821567454	0.009392814552718676	0.027286764796307317
20.522	0.11091032874673346	-0.04949586861880917	0.0007248127723293862	-0.023048003224309	-0.019375309075198466	0.0016321375056698173	0.006915433205270105	0.021348098106416025
20.521	0.10021240270148724	-0.05021531634746523	0.0002740400198586457	-0.026375084901935963	-0.020989264588979317	0.01032948251651078	0.008516603032223458	0.013236259399476147
20.52	0.10365475739341967	-0.03897080096089045	0.0025687365216935376	-0.029009024381906556	-0.01800876057086498	0.009704667230302277	0.009139333098757696	0.0299395752317535
20.519	0.08299376972869865	-0.03586791346541318	0.002703082690082681	-0.02934581045360396	-0.020039058634730544	0.010108753090093181	0.004643916985097363	0.010552822955126828
20.518	0.07258508096171301	-0.03660738762266025	0.0020646650597875293	-0.029195077536250835	-0.020666396131622022	0.008951013825186038	0.001625321896693066	-0.002868101443846527
20.517	0.0821104714380061	-0.041051988721585	0.003274656781223406	-0.028012280513483034	-0.016935875470166728	-0.0015601988239817288	0.0017758795316193954	-0.0021752153099869886
20.516	0.09145996248192656	-0.04167018486763219	0.0033898404854895148	-0.026775406204756713	-0.014713506968634604	-0.005616082110543985	0.00046270245773882834	0.006074622815848585
20.515	0.09144514661982495	-0.04364080591180208	0.005156138695986634	-0.02674624807071435	-0.01024010982250978	-0.007058232179075752	8.807393109666606e-05	0.008915889331709614
20.514	0.09174262021134094	-0.04480689575035601	0.005884926024834591	-0.02518843066299148	-0.010230317508187703	-0.012874909994936345	-5.0829125999740654e-05	0.004526992319703993
20.513	0.09988256469926071	-0.048631123494367046	0.009232107937563683	-0.02402615036244793	-0.007117797587564922	-0.024015124610695437	0.0017463835596265298	0.00532447658174906
20.512	0.13525836568000127	-0.06109026606933021	0.009737064914475901	-0.02303241974140935	-0.004828836608275822	-0.033470208544095215	0.009285215968041882	0.022573699631366573
20.511	0.11461555299888015	-0.056954649977477345	0.01307417005362943	-0.022853403574710995	-0.0026683228732586883	-0.0378516611094053	0.007192745018541835	0.007361685517657257
20.51	0.10608824087538249	-0.057347025803222706	0.018423564706895768	-0.022552901457451036	-0.004423322668849927	-0.04860863881773181	0.0025961343147296034	-0.008420083164977221
20.509	0.10401953106924378	-0.0536977741570448	0.022094591545358533	-0.022082008269603826	-0.005078425695923983	-0.05262052898314806	0.002447032981601538	-0.00736461449111836
20.508	0.09822410726422959	-0.0636184465361973	0.022935272663399786	-0.020634927796548297	-0.0073152014770077045	-0.06082926063290195	0.0004984581688498579	-0.03123845651502588
20.507	0.06355212371560182	-0.06423296796514233	0.023366644351676236	-0.021127892944633686	-0.011015585561946928	-0.04786869832940255	-0.005803783005584151	-0.05732637673384744
20.506	0.06807938758589316	-0.06822375630757627	0.023372596493389963	-0.021947890439248496	-0.014578904194501696	-0.03785533863734791	-0.0020416422420845848	-0.05115390549939125
20.505	0.059144367621778215	-0.06370712300995773	0.02342156405785545	-0.02172388371740208	-0.016585029804374152	-0.03547394951994498	-9.44464307917059e-06	-0.05492405437204528
20.504	0.06494690266812775	-0.07376885384414766	0.020510881657916258	-0.020742552748726162	-0.015675976183482376	-0.03255256387333372	0.004799955423202995	-0.05728216232364591
20.503	0.05900466037547414	-0.06750216429042588	0.01787951854876546	-0.020723630330471643	-0.01614387948955809	-0.02868957298855257	0.006090520768673002	-0.05617506817476858
20.502	0.07263050437792895	-0.05986181521960532	0.01947641388502408	-0.018777751121024977	-0.012268957233122713	-0.027206279680967782	0.010801808589125272	-0.02600788499176776
20.501	0.08855030594886504	-0.04205800009111016	0.021467295239506967	-0.016552618810430353	-0.008984231249298702	-0.0315376194030339	0.013134069335031029	0.01088513163449889
20.5	0.1029904224049929	-0.05216311131826412	0.022275819612860737	-0.015662677167975758	-0.00837458378159095	-0.03359304841759858	0.014877993414900814	0.015472821332424225
20.499	0.09923035424988047	-0.058053284376408776	0.024434254743435524	-0.013362559757015724	-0.007076906441480624	-0.03312710676207775	0.01339536978551159	0.01204475165633312
20.498	0.10076251861523566	-0.06018860433099871	0.02740080205066331	-0.01050053432363196	-0.00789935375827433	-0.042933631737628986	0.013409980619430328	0.006641196515364989
20.497	0.08044378664064666	-0.05442651188792791	0.027459043980793574	-0.008520961796216753	-0.010262100845197075	-0.04508676304678083	0.012993457973272449	-0.01039350695468233
20.496	0.07620740913582669	-0.04780687849509668	0.026509879441491968	-0.007120511333099877	-0.008222243830639187	-0.051151987761612894	0.012098069797809252	-0.011584332843129985
20.495	0.07102553205660644	-0.03817645074163867	0.024129309407537214	-0.005800427580281209	-0.0069038487267887305	-0.044633587251350804	0.008814228265818791	-0.00035947283591575285
20.494	0.08565267842342017	-0.03706246744775665	0.019763136660139402	-0.005609481075066647	-0.006419080904558783	-0.04092650998793168	0.00925442405101684	0.015398275668245809
20.493	0.0733469239622222	-0.03952962884892841	0.019017938078063956	-0.006121891190919548	-0.008327393797271654	-0.0311613491935141	0.004173181625021449	0.007224599009652444
20.492	0.07166880996967606	-0.044594083709062815	0.01698335022634101	-0.006638386376102368	-0.008304227233564276	-0.023009871146719263	0.002298044062882809	0.006105591730568349
20.491	0.07372525960103182	-0.05118280314267398	0.018418297035009523	-0.006217642587455607	-0.004313368861056155	-0.022120031835151543	0.002054828488749827	0.008309710209704058
20.49	0.09186579749798351	-0.040943654246867744	0.017942985584895155	-0.006522657469883342	-0.004474956048076351	-0.01972044962712438	0.002156324747818239	0.03814706569092685
20.489	0.07754534158249893	-0.04235891475381148	0.015234573576714538	-0.005162761029080087	-0.008059506141980144	-0.015236208868220302	-0.00023089056151270881	0.02196252436612145
20.488	0.09052267991650442	-0.03842862778926648	0.012856476531879046	-0.004759676766182608	-0.006170999480294981	-0.013191056258139433	0.004165872719435804	0.04082879615449997
20.487	0.0805411638024669	-0.02468864147546146	0.009049757746013576	-0.005194106236222851	-0.0061594229140284895	-0.007481075732447273	0.004329517789184223	0.0460676751903204
20.486	0.08050604622927793	-0.02087721647039853	0.005900154690785087	-0.006226364185117461	-0.008809103624114023	0.00023871254999541236	0.005583842677166828	0.05073222919042841
20.485	0.08399236014912859	-0.015869779658085115	0.006758065275163538	-0.007453880097582299	-0.008157150967713633	-0.002164383516261914	0.003913566846273753	0.05710523118464916
20.484	0.07458007949058842	0.0010236993529710858	0.006507317908505783	-0.00773583850681181	-0.008968519143710552	-0.004489353787424655	0.0007318405110572357	0.06091738531411828
20.483	0.07561091475157156	0.0009459178346586938	0.0057188787596080815	-0.009862079709036742	-0.008274168536705595	-0.004457288674916349	-0.0018193780629260914	0.059682174425179646
20.482	0.06807167336470066	0.0016042103550768516	0.003899914640705937	-0.010561208785514253	-0.00999081262130197	-0.007109883755210156	-0.005837887689113863	0.04591389319845707
20.481	0.040817596610179585	0.009632532788260484	0.0015004914541378866	-0.01178075586892291	-0.012145735682294934	-0.004232413011523661	-0.015744761204866897	0.02379171628983645
20.48	0.048700673944853	0.01679291129967808	-0.0005831674211753679	-0.013806123135057469	-0.014297351364860766	-0.008877322737652626	-0.020053008120251015	0.027929620585784853
20.479	0.04646099896431366	0.021118121842751414	-0.0030495842533433404	-0.01415182474451182	-0.016069116970843567	-0.011508979524086804	-0.022008030849974602	0.022799615314279542
20.478	0.06706503364109562	0.0170570823120606	-0.006735655532319029	-0.014993623935077416	-0.01665314394626982	-0.00803796091055986	-0.02188089542905125	0.03770173162893009
20.477	0.07839583786551341	0.026875225040044803	-0.008608553947448527	-0.017127493295738816	-0.012713397180538877	-0.011847226149621193	-0.02064410452230625	0.0549743923322108
20.476	0.0922793276151408	0.024935319489320484	-0.008603964104962003	-0.01849430411090669	-0.009108218917375233	-0.021743523986729407	-0.020371351052683728	0.059264635984487946
20.475	0.07401321779935799	0.019782722252245755	-0.009861297163856975	-0.018548311662311967	-0.0060655690800102136	-0.021877287322799255	-0.02564025468559894	0.03744347482262533
20.474	0.08373138050355422	0.008441422777007546	-0.01019613389217966	-0.020005413217834445	-0.0047946817574962	-0.017280281915259543	-0.025586280459962474	0.03989629249779192
20.473	0.09371973195879413	0.008053000726926385	-0.008645430163247703	-0.021416905999386948	-0.002814904302135268	-0.01671140849187136	-0.022664675047440852	0.052184083729079234
20.472	0.091408157062709	-0.001083161074901362	-0.0073577011540111315	-0.02306325732186565	-0.0033917884490985983	-0.008732575479887927	-0.02323377392779058	0.047779673582944326
20.471	0.07828539084766728	-5.8386691795142553e-05	-0.006757441157864363	-0.025777310528837027	-0.007338399833524356	0.0011125160919691623	-0.02580234653332969	0.03946636872761555
20.47	0.06683626062774639	-0.011628873557850916	-0.0054132740577799154	-0.02758059716759398	-0.00869067080567909	0.0066214240702882066	-0.0270385266976092	0.020144269109130697
20.469	0.05118724921939677	-0.01880268769625637	-0.003842645073387274	-0.02877609602289155	-0.00853032868589576	0.012003613746906616	-0.030508715317411728	0.003239105487872429
20.468	0.06386888642887456	-0.02407634304611772	0.0028617241995148035	-0.029211280033027975	-0.006782009570819092	-0.00031250242451719146	-0.027687067642605534	0.0063484755539073845
20.467	0.04737625856522243	-0.019523136250685802	0.009505299580650828	-0.029420288577688858	-0.0068954845537545495	-0.0056490940081106444	-0.031036208775062413	-0.004606445244366597
20.466	0.07577739855933974	-0.022124476229111067	0.013643168409450013	-0.030479468132998733	-0.002428146161968847	-0.019382893621383346	-0.030715203433368643	0.015005582823327757
20.465	0.057793911515910956	-0.013966089456252107	0.01609223433102791	-0.032506165162266676	-0.00376026921740813	-0.010562678978971896	-0.03589644813518511	0.013090943032040059
20.464	0.0637377796744456	-0.01814286657123354	0.01771023841426178	-0.03445926035735436	-0.003451001724489977	-0.013195626722965592	-0.035916548721487196	0.012199262712663916
20.463	0.03545124788154386	-0.026177285438842013	0.019805879536741955	-0.03571601670339142	-0.008409625618996053	-0.008885462726837545	-0.041919241229022575	-0.023931263069781217
20.462	0.05195083603066042	-0.030521182154622295	0.021074831563731244	-0.03663211240133002	-0.0075332400202752225	-0.009788938337875308	-0.04045185357021008	-0.011449805319711182
20.461	0.04456470115571598	-0.026121711841005535	0.022012148568705925	-0.03786194334184145	-0.009280546597728367	-0.011442728439860161	-0.04120989365253269	-0.018130080496013612
20.46	0.042241111799442344	-0.034190004807296503	0.02080792425035405	-0.039569827603500585	-0.01318798082562811	-0.004362901503847105	-0.04044567968936619	-0.02826167869047591
20.459	0.03175345318121092	-0.05144927340773009	0.020065776716528205	-0.0405482409262623	-0.0212278203027374	0.005445440078638342	-0.043219678871474265	-0.05596066466035232
20.458	0.05302777652528512	-0.07235016089168589	0.02012863684280486	-0.04027569685721044	-0.019218853815610615	0.003992392649242227	-0.042635049496349886	-0.05469590554717474
20.457	0.06346368859587503	-0.08375993890870603	0.026178585347794048	-0.04170983604025391	-0.018337154499391772	0.0005280109082566042	-0.04223572771975448	-0.05363664459642603
20.456	0.0734551269729824	-0.09373010434603923	0.030456644287456314	-0.042647352376461	-0.017625012661504513	-0.005753367388277475	-0.04233244129924518	-0.05584406551184351
20.455	0.0700314307643799	-0.08823918848247292	0.03375130706330065	-0.04143122795152099	-0.01765731340564969	-0.013254158946838679	-0.04712577251234151	-0.056799150958801725
20.454	0.06663352456524052	-0.08705602198596196	0.034502018991676486	-0.03881353321927783	-0.017618553079180366	-0.017961069127113483	-0.043366449339269586	-0.06031363385461663
20.453	0.08301994258382184	-0.10008802009188766	0.03510556425670952	-0.03788897482518294	-0.015519958235606701	-0.02348826386101699	-0.038232933857099916	-0.05885971017316294
20.452	0.07822290741389715	-0.10022748682099802	0.032836663964327606	-0.036804658225274345	-0.013942709246531848	-0.023411531124043705	-0.035703221430567034	-0.06332681403862317
20.451	0.07942723023094356	-0.09120707609852552	0.03123167664403592	-0.036555289399811564	-0.011808111965478041	-0.022844864961707678	-0.0306974510429745	-0.05175643555054332
20.45	0.07202476953180525	-0.0881948566790891	0.031778506963179964	-0.03606802759790817	-0.010995701573064842	-0.017690570392047356	-0.028221381422016023	-0.049145879747124255
20.449	0.06696903894100714	-0.08812909118435108	0.032176136943714795	-0.03464659013222793	-0.006289591489680113	-0.014952198139932094	-0.023505544704463865	-0.04487229506146928
20.448	0.05335812300988163	-0.09137825964509982	0.03129163566364035	-0.03461354817662343	-0.006085896113663836	0.0028476189103772143	-0.02016909338886652	-0.0445803263514879
20.447	0.05853925435808982	-0.08562068772792575	0.033376198323118444	-0.03543923382142555	-0.0003209928414431573	-0.001854147941416251	-0.015103751641311725	-0.031319609651002445
20.446	0.0391879877716077	-0.09271871831945155	0.034121471520762725	-0.03500349674016601	-0.003374042578046854	0.009708161940486626	-0.012841943750448337	-0.04807863640480736
20.445	0.02259019273187146	-0.08315676395543115	0.0366173337150677	-0.03536924636078709	-0.004300796598627699	0.01838183709112773	-0.011719965641467489	-0.04523744337677904
20.444	0.012966452395121841	-0.0832287708551398	0.038336999987858	-0.037026078981738486	-0.006104604016494264	0.020862638832818803	-0.009810509501443576	-0.054193362637573905
20.443	0.005765970406628185	-0.0750349823029337	0.04000904625624724	-0.03526311479472355	-0.003953852093198762	0.013149383030799378	-0.010171194510292025	-0.055327549497181217
20.442	-0.005885377531336999	-0.07572355162975963	0.04265816903024078	-0.03477860909739405	-0.004581223894231101	0.004644439799291966	-0.016141788110814126	-0.07366615332318904
20.441	-0.004415150206426688	-0.07969563645854905	0.044356297406972445	-0.035587916959531896	-0.002905773284658686	-0.005160947108813652	-0.015103695261180938	-0.08340912661100752
20.44	-0.022487686557982833	-0.09198868924736114	0.042830914876287984	-0.03600960867335434	-0.003352326816090212	-0.0044463220998016695	-0.01791502124920541	-0.11545371851830222
20.439	-0.030374720444778625	-0.09441341159267314	0.0411428919939274	-0.0373498415393092	-0.003128786045182963	-0.00244809973957949	-0.01946779596650572	-0.12657196736759602
20.438	-0.037285684052935864	-0.09026375361216665	0.04172946202931538	-0.036376963726089784	-0.003911528789857677	-0.0023436376946976978	-0.021598577357446302	-0.1284521058464323
20.437	-0.04237579614795006	-0.10109394608457212	0.037064728186224194	-0.034966963220988134	-0.005093732194938028	0.002217868463649353	-0.02437838131283243	-0.1442478409985748
20.436	-0.042039948140445205	-0.09305214233555947	0.03603446398376686	-0.03466182707816223	-0.003943523222676326	0.0072865566579229935	-0.020493393643572055	-0.13037642013515338
20.435	-0.04802048609029885	-0.08339205476806377	0.03680945924049084	-0.033007779607286736	-0.003364956588226775	0.00828471548183174	-0.019026536386815174	-0.12269110233155356
20.434	-0.030630615767858416	-0.09898275972072312	0.036183929677222615	-0.03287862258257768	-0.0067333899767385574	0.005568037584413155	-0.013367976519772284	-0.127473420786262
20.433	-0.01239185322137093	-0.09562099645100641	0.036985180235729054	-0.033825259349182346	-0.005489257633115585	0.010046271190347511	-0.0058485572093509575	-0.10029591522859871
20.432	0.004345216136869112	-0.09235173085831505	0.034693097482993096	-0.03487678289489171	-0.004114128093041458	0.008420391121394033	-0.0010202698228729545	-0.08388393710499198
20.431	-0.007907286485032472	-0.0879553436884164	0.0322647305229955	-0.03385758931229699	-0.00461107325811394	0.0039036439357760244	0.0007311044365945207	-0.09816291828508827
20.43	-0.017819606753706196	-0.085523996593877	0.027699420528814578	-0.033535153897475745	-0.0036072780900653356	0.010092945355944849	-0.0012775916893668082	-0.10269366945036484
20.429	-0.017648832557729754	-0.07493075534895599	0.026960695816548252	-0.031171470123704914	-0.003160601397417473	0.004879869749450094	-0.0008125902705025112	-0.09507109386180979
20.428	-0.020593484966702214	-0.07444098439622149	0.027524296210904353	-0.027929034599053715	0.0037203781611800935	-0.009012979032457125	-0.0013131011377449653	-0.1007318086223501
20.427	-0.03695302510471521	-0.0708585374388484	0.026479753137141238	-0.02859875320885319	0.001995774832455055	-0.005427668512756334	-0.0017455382941404807	-0.11336245629557684
20.426	-0.05615208275179384	-0.07053516483635036	0.02087248305541678	-0.028904065155415992	-0.00021680816686675541	0.0007265879267377429	-0.003883823183461921	-0.13420904992827243
20.425	-0.05844029169249776	-0.0898177723912239	0.021140896403799125	-0.02756118427561205	-0.002231660238818378	-0.0007282513643405153	-0.0018012025866331882	-0.15763826355869348
20.424	-0.05557186317349316	-0.09864700624306444	0.02221433647402371	-0.028423410833148033	-0.0008453425967136496	0.007421244144275363	0.002187827403198561	-0.1538520422281202
20.423	-0.06432112703175186	-0.09639722232749204	0.02285662407285116	-0.03145480045080795	-0.003207534692541536	0.019488389924311456	0.0006777940150985984	-0.15303567050543077
20.422	-0.06655386767862215	-0.08737737752708519	0.024828713188136398	-0.03347999959288117	-0.00031034173961153044	0.02244374971346197	0.002132405165410134	-0.14044912363660167
20.421	-0.08228797761148599	-0.08119864158672296	0.028842624080654744	-0.0343190026622624	-0.0014544761716663857	0.019908115711320562	0.0004622554870339357	-0.15050935824016243
20.42	-0.08871711048861197	-0.09068461728914645	0.03456024254713519	-0.03386272003742885	-0.0009259389505125171	0.01689955050608294	-0.0031655127382927972	-0.16273059371248166
20.419	-0.08791076509304929	-0.09407070169557574	0.03870307950281138	-0.033632835075882106	-0.0014368981880945597	0.014942804594255676	-0.0020333069084070843	-0.16340531595553465
20.418	-0.08534333823407803	-0.09881191039747073	0.041526531001504274	-0.034333021398804675	-0.002201354192815863	0.011089705345798784	-0.001574190875959225	-0.16807338787586623
20.417	-0.07779016417007956	-0.09153704003670171	0.0439365518642747	-0.03370751710817821	0.00031344914760733644	-0.005759020017705119	-0.0023042783881503937	-0.16454374032078256
20.416	-0.09418556445220982	-0.09704876538544749	0.04780792591075045	-0.0318444429589535	-0.0036121033842713146	-0.007391019309202385	-0.005997181694943343	-0.18627396957933406
20.415	-0.07747950597993203	-0.08438271019066601	0.05089251763546265	-0.02936401916466469	-0.001454366314067812	-0.022860913580232456	-0.007840871748008738	-0.16464899759410034
20.414	-0.05852390853786549	-0.09087251865353618	0.0514979715718864	-0.027232616320426395	-0.0016017453249759228	-0.028376386123107444	-0.00578610145662406	-0.15510920338802503
20.413	-0.04609552164587605	-0.07764463221387441	0.055665862095820806	-0.024721571988919777	-0.0008114628935507184	-0.03148376828393751	-0.004212931135593401	-0.12509109493033765
20.412	-0.03717015911642907	-0.07100016599399162	0.056974215246404114	-0.024274938179375205	-0.0032061151665159215	-0.026495793218124675	-0.0037390128827681224	-0.10517295642803237
20.411	-0.049056435447941915	-0.07065337285586537	0.05644153288085629	-0.024274978880674425	-0.007598346184702898	-0.02168218809035416	-0.0016857781304269182	-0.11682378857868247
20.41	-0.045941367313305115	-0.06322607754963894	0.05715774409157426	-0.02167693765934242	-0.009442168495213288	-0.026231349109957947	-0.002321529613693585	-0.10936015603588345
20.409	-0.03423804533259478	-0.0608013072393625	0.06155079104063166	-0.02029284197558301	-0.00943483044374549	-0.040754374756460265	-0.0007622691303064144	-0.10397060870711439
20.408	-0.03790017890870612	-0.07057645762264375	0.06785208980586255	-0.0185056503799359	-0.010879993867859206	-0.04601524854965433	-0.00022246137523307397	-0.11602543952293676
20.407	0.001881773846638346	-0.06789559788608734	0.0692036011442072	-0.018894943705481282	-0.008575094502301539	-0.059263624813436167	0.011501838675073373	-0.08354388591646078
20.406	-0.0034560305263573454	-0.051621383435730195	0.06927177048299882	-0.020380287883740245	-0.00865957441841747	-0.05539530668205117	0.01343408628590037	-0.07024081246329761
20.405	0.008303763651784202	-0.07116672912137734	0.06890573034976555	-0.020407304433343043	-0.009347617828789012	-0.06056158239880549	0.01756851674769333	-0.08427373978076513
20.404	0.016632826352728003	-0.07866506278307828	0.0677669918754713	-0.02321349084893143	-0.012513066765778014	-0.049635485607105956	0.01620034410812554	-0.07962728777669437
20.403	0.005764730091430081	-0.07203648474447455	0.06753470472566825	-0.02473031392007652	-0.016372099060002476	-0.04633989534444716	0.009917391308808199	-0.08617935825190237
20.402	0.00697266004461472	-0.07637425958747812	0.07006660596944148	-0.024182065408282938	-0.015107633089688655	-0.05278485832994573	0.007907931231361687	-0.09140955040133925
20.401	0.004056911168732746	-0.08453017689753484	0.07307683627730377	-0.02538881859946418	-0.015090027403527273	-0.04360808030205021	0.0073337606537720035	-0.09148335575653999
20.4	0.006809340156035404	-0.08306173607529121	0.07518939602386876	-0.027148355659847745	-0.016054631558695576	-0.036695776286098436	0.008748683009401681	-0.08096176340002881
20.399	0.010445693409288026	-0.0928882616846387	0.07919737710085517	-0.027985881613840746	-0.018816925563993614	-0.03974296651642284	0.009007806052803602	-0.08979096486875271
20.398	0.0051914260373031595	-0.0873205045490062	0.07911942648479187	-0.0296833026646377	-0.017134679379356754	-0.03352041870387268	0.007669583910732136	-0.0833480527747783
20.397	0.0017220597372844537	-0.07957235985004729	0.08064512720513495	-0.029729023146559896	-0.0165376759189364	-0.03481840531892555	0.00881412262572212	-0.07829027729204974
20.396	-0.0023946980244966554	-0.05737415645874222	0.08199354448506568	-0.027488607804279752	-0.01536856346294968	-0.03976361821549812	0.00876678218207072	-0.060396099480900745
20.395	-0.009464546712326438	-0.03672059738009725	0.08571633498654307	-0.025024011927441414	-0.014942907673855643	-0.04527207374374154	0.009535439410324642	-0.04570780245091921
20.394	-0.008932931614144657	-0.030604930855983703	0.08788069271307197	-0.02503608811496072	-0.015287299159314038	-0.04269331184887282	0.008782695284160091	-0.03467386888020396
20.393	0.005869489283067075	-0.026533666877870843	0.08877262821277121	-0.02406629216930245	-0.015497572893546696	-0.04894660771785997	0.011706733777079315	-0.020402022162741673
20.392	0.008749459988740327	-0.019780277896424003	0.08652347352437229	-0.023660987556836766	-0.013780194984543748	-0.05192881268741356	0.011058711127567733	-0.013877339612105466
20.391	0.006118953358284607	-0.02353083100285147	0.08288813141636808	-0.023308775935888093	-0.019503629349919116	-0.043990095851319744	0.009310541938431172	-0.021326247365325735
20.39	0.02306749448984924	-0.02016536893298948	0.08093010443687287	-0.02201027781941356	-0.018880132235933544	-0.04078740592197949	0.014397735648029375	0.0021544140164060366
20.389	0.022376616700118923	-0.005174047456934616	0.07955037043163138	-0.02178457805898759	-0.01972240673094916	-0.043316810295713104	0.015739168578094542	0.01192914458916583
20.388	0.0399030957269888	-0.010962719107382668	0.0755289638376837	-0.022068105185592657	-0.021394415729492522	-0.044929870118264326	0.01945013927125938	0.016076949423940334
20.387	0.03747910619231565	-0.006795782183877996	0.07221535231833354	-0.022595201990275093	-0.02291445979509632	-0.03595337364339368	0.019060694345936824	0.021435640898006092
20.386	0.03495619986613008	-0.008115686146030754	0.0685394233593728	-0.024869665599088542	-0.027884825703127447	-0.019944470391942026	0.02091353105430116	0.022680975385314106
20.385	0.03234481938949241	-0.012086378913894968	0.06304496116128355	-0.027360347113745576	-0.03109458390456954	-0.012732918427038165	0.020376997479751857	0.012115552191527712
20.384	0.02911751633044002	-0.019711083358748382	0.06221955262497936	-0.03050007487493467	-0.03406244335360853	5.058007213065707e-07	0.021688297204148554	0.0070639731688491025
20.383	0.022232415166217656	-0.014395588472685183	0.059311051006814886	-0.031468862212186366	-0.03483972752909015	0.008036301876257035	0.018270170998158086	0.00887558983532788
20.382	0.02686166068911522	-0.01748046114681845	0.05547380918693268	-0.03290954246067912	-0.035106323492440694	0.009133657586411381	0.019826626595585317	0.0059728003625210135
20.381	0.02349051843701755	-0.02687599546942998	0.053758934627181176	-0.03385165509944965	-0.03606075521900376	0.010014755285625121	0.020044029026112575	-0.009524197438059545
20.38	0.026621783284801026	-0.017047904023716143	0.0511573573511912	-0.032808396750804825	-0.03480231833089409	0.014107699270420326	0.01733544720947222	0.007228220800997498
20.379	0.04098392945643159	-0.010994696552634409	0.04769327954107627	-0.0322649353146911	-0.03023326795369119	0.01719805494556592	0.019723040767123834	0.032382364122057083
20.378	0.03654181834009407	0.009779359449439085	0.045757442866656284	-0.031331025712774796	-0.028888171958116438	0.021755266539294382	0.019259126504787893	0.053614689524592585
20.377	0.03562202994557673	0.015008627080038472	0.03886917376399346	-0.03210174930101939	-0.02768970015102301	0.016280734983010525	0.018806234092876295	0.045989116320576784
20.376	-0.004363130279754657	0.021400961760558168	0.03577758606011994	-0.030767418020737125	-0.02913567042185683	0.017124923109404833	0.009217527843886408	0.010037252207734326
20.375	0.008251394133051093	0.017064112615106986	0.03604982118167577	-0.029998403737730328	-0.028633234843656652	0.004593908285733583	0.010954633475890319	0.007327597634180449
20.374	-0.0008031744488450343	0.026269720483509396	0.03066871153220685	-0.03258990920190197	-0.025834063684747832	0.01488397843664302	0.0072391420265738304	0.01259526311686443
20.373	-0.016552760905408803	0.04232992528726598	0.02310067636656221	-0.033443921614274785	-0.021566959658306573	0.01788854883230684	0.008294395821351053	0.011755508308144869
20.372	-0.008668614111788209	0.056509015012068176	0.017599035904490634	-0.0336834341916159	-0.011411267300919015	0.013404532476449127	0.01429456894451775	0.03374926778868481
20.371	-0.03068101706515769	0.07637522391538898	0.010275032487144564	-0.034543531349186196	-0.010577209622074868	0.020758656059333802	0.009959087272400247	0.03160715442544859
20.37	-0.03968503578820748	0.08463554124023709	0.009309762589626125	-0.031887118476118914	-0.011344966893335418	0.009414591329021782	0.007095071226397742	0.020442774001223185
20.369	-0.025665207628137843	0.08844347266199559	0.010074517233621627	-0.03182080580830249	-0.0063964758861612125	0.0021564843540007317	0.008012204478411	0.03679198492701641
20.368	-0.03369438102476252	0.09435686884584804	0.008342953335732872	-0.03210685931206747	-0.004872201783616248	0.006175721632473596	0.006641245648219218	0.03820210169360827
20.367	-0.022877650018785722	0.08718245771870681	0.012501138126228106	-0.03232579462617213	-0.003936223776864978	-0.006900202985888448	0.011385982342988932	0.03364372443722363
20.366	-0.01967525133292014	0.08635240023534774	0.01363937805417148	-0.034583467664887735	-0.0011408258585845488	-0.011084255439781643	0.013972690985410985	0.03350797799334515
20.365	-0.026086937477561634	0.07861742284189344	0.016897230473698954	-0.035962770062679894	8.179959567211625e-05	-0.010875823664202144	0.014798666239668634	0.022670921706820835
20.364	-0.009651925991382981	0.06474567051272562	0.017893340955420278	-0.03734906528935511	0.0014199965430243822	-0.015876586058777953	0.018102857018357454	0.021181430671654233
20.363	0.020738902436755247	0.07139571240831444	0.017458554039420093	-0.039313484073905336	0.00739723000665915	-0.017410925396753818	0.025332398797486277	0.060265989420489774
20.362	0.005037220459997549	0.080052742410742	0.013614573393986085	-0.04006432380162828	0.007880402278536813	-0.005424120203833205	0.022890486230155993	0.06109649453780097
20.361	0.019689192434739766	0.07052217918253323	0.013946364549139112	-0.03928054430704098	0.00761637662287562	-0.008191342946444635	0.024455430193428995	0.06430222553580212
20.36	0.027208594574062772	0.0814961911486689	0.015493091183012453	-0.03741663722359867	0.009097961794839016	-0.019393314817357066	0.024310009539141753	0.07648588665962741
20.359	0.018027087130128017	0.07152730558662235	0.014115840410716451	-0.03833259676418255	0.005963094407176683	-0.018053814001701696	0.019315867770674622	0.053246916768759256
20.358	0.02377290872147242	0.05109812503613309	0.013878963038521874	-0.039026292578662414	0.0023165046109685505	-0.011263874159791243	0.019537972359891853	0.04077633466864228
20.357	0.0160340438580171	0.07035773006188961	0.016485569224326646	-0.03848862799498054	0.005788606493940307	-0.01595007299784168	0.014063699471845048	0.054227248645351445
20.356	0.03150489896456943	0.08377401977450472	0.01936018180202126	-0.03627248900663638	0.00742469819613234	-0.025994972127870497	0.013856736589614727	0.07979633760272087
20.355	0.022705573792635825	0.08901018780855807	0.023028884062342492	-0.03511771483038206	0.008972609121287611	-0.03530032475137901	0.007195062731672586	0.07329921520306293
20.354	0.02877376345383542	0.09477800875924114	0.027540441557958317	-0.033816202039153254	0.013651951701103116	-0.049626470859566396	0.005542577127898518	0.08130149257341834
20.353	0.02277245618462942	0.0895151094423623	0.028459898315770005	-0.032484364605842586	0.017728953608565412	-0.06354280004776047	0.004111649074198809	0.06244925289772407
20.352	0.02774701546841385	0.07964853269691297	0.027717307331129426	-0.0312546700044285	0.019660906422645397	-0.08001416117290461	0.006724414010353286	0.04350493074176853
20.351	0.025703189882762878	0.07402605903247927	0.030042698842335902	-0.029962118321045672	0.022072440121116976	-0.09229838486022945	0.0053536708734771565	0.029583884697419904
20.35	0.01947192510834128	0.09019717676793437	0.03336598193182372	-0.029504451351455963	0.028650922272767332	-0.10308793177812614	0.004529416955674215	0.0390936229512846
20.349	0.023723184518712692	0.08692665776360631	0.038336536768209584	-0.03063278894007926	0.03272880148730639	-0.10875804958025714	0.007973628032514668	0.04232434201749857
20.348	0.027917658228270525	0.08301196679589662	0.042118427027733496	-0.03188115854071594	0.03391301910546485	-0.11306267324384933	0.01135075050854173	0.04201723937280022
20.347	0.04078738317753583	0.0627814290322588	0.04120963349148443	-0.033582483239166905	0.03453553313195368	-0.11171285232029948	0.013171611067789968	0.03401864327376636
20.346	0.04400466549396587	0.06701398135849423	0.047671726187199503	-0.034038662592535296	0.039336203549929394	-0.10680760565048697	0.01507091996206622	0.05718030834656673
20.345	0.052979664532933235	0.057252669096377495	0.05018215142787863	-0.0364797062919191	0.04148409017222843	-0.10222543115011451	0.015057187439087016	0.06319343778738418
20.344	0.04439034994247759	0.05004369048783186	0.050442687509247186	-0.037915454968165285	0.04136734112916063	-0.09220307614682355	0.009244663994682156	0.05612553795372843
20.343	0.04264941127689781	0.053429145666355815	0.05600498512252905	-0.03563786314165096	0.041843216987986764	-0.10001361882684368	0.005453820011208421	0.0582752770852748
20.342	0.038889189413774616	0.0373303391911497	0.0625575269800489	-0.033984217463457256	0.03916622025575478	-0.10583806404415164	0.0027093292400488522	0.03812099433311911
20.341	0.029491406043620216	0.02699418131716058	0.0692802115781177	-0.0330992164423094	0.03480964258031527	-0.10672546342711442	0.0003399041422422755	0.02075076164978995
20.34	0.04678053971335494	0.014114749300351725	0.07835001791931706	-0.03232502168010054	0.034268286261561975	-0.11805465966831097	0.006082005511815147	0.023133911846174193
20.339	0.051322022788070853	0.020538998683838905	0.08440772191950607	-0.0332684764765121	0.03950116336757148	-0.12435892951259575	0.010181853105610372	0.03814250076987946
20.338	0.03663116575063441	0.018403017067393	0.08828096993134515	-0.032242189532488474	0.03636476876171724	-0.1265307596611045	0.006402042493370175	0.02090697231749683
20.337	0.04772000197657089	0.02988330102561143	0.09052189393156951	-0.031128656425632784	0.03864912581410085	-0.1331899669786809	0.008676059586667506	0.04245569934353899
20.336	0.03512863108982334	0.027416424422343155	0.09108951608293481	-0.03032899367046671	0.0376505813229846	-0.1266569174920278	0.005014960819589298	0.0342992417555914
20.335	0.043295427459348446	0.034650129444712796	0.08844485815128778	-0.030456690761712757	0.04113258618755289	-0.12299288075420822	0.004680166157561949	0.054073429726980926
20.334	0.04057207985593703	0.04138421961528138	0.08289911822908458	-0.03449754642809655	0.0391170464298316	-0.11252900656221243	0.000373256153059387	0.05694591113982561
20.333	0.05206872779946625	0.04617162156618626	0.08005588811345721	-0.03616594467443335	0.0410732694583027	-0.10993477714999944	0.0006958620831456486	0.07326878511297963
20.332	0.027959867295118457	0.05804595783242217	0.07794768146790698	-0.03567642830504347	0.04065404409805673	-0.11254058364821606	-0.0015675431545068008	0.0563905387402448
20.331	0.02804455353570301	0.044698101657933975	0.08101698088900822	-0.0357346462071888	0.040619128952965156	-0.12453129305998978	-0.0018640254755695196	0.034112825768431776
20.33	0.025449570233904595	0.05000102277283425	0.08488122698770972	-0.03546354248728267	0.042947413972820314	-0.13700220658561157	0.0021518787402419193	0.030813484894374632
20.329	0.020438364565027456	0.043127678033690664	0.08872004718946869	-0.035230449075020154	0.04266318896587595	-0.1425883379982853	0.00498383789592971	0.01713049168075731
20.328	0.042921988927017374	0.05976115559959716	0.09632916381596157	-0.03577781342169217	0.049705028935420614	-0.1580554625962085	0.010132588980439117	0.05488406126009604
20.327	0.03928278361866777	0.08061479714551378	0.09782015688772727	-0.0366435235825886	0.0528477516398036	-0.16839170070078957	0.013516619244020589	0.06553026500833425
20.326	0.053957046834049116	0.07275923912997584	0.10142129408329392	-0.03738491525243859	0.057677081220700366	-0.17687073795899533	0.017780866715120247	0.07155900805658533
20.325	0.04596476923466408	0.06102948221017446	0.10435182058536885	-0.03803874150196673	0.057894857977470515	-0.18319525380390278	0.018352193092683322	0.04800693470180839
20.324	0.06715087296807454	0.049213737267758795	0.10996405089283989	-0.03758442955524188	0.061990071687399784	-0.19472326514623628	0.028518969752312273	0.05601103811459485
20.323	0.06435665225146625	0.05279283958685532	0.11346832325931988	-0.03750733119532068	0.06212849147981281	-0.18997941075781544	0.03032439491710104	0.06525956462431814
20.322	0.05621446391656271	0.04721196691274976	0.11361207701136777	-0.03863200304478909	0.05795722643519863	-0.1842218242528899	0.031067999386440448	0.05214190697819987
20.321	0.05730237102004221	0.05831184364503983	0.11774222562653058	-0.04009705000971664	0.05598715063664628	-0.1758932482954343	0.03212398448256515	0.07335329262310797
20.32	0.05760754365349641	0.06510113797772199	0.12132620452367426	-0.04032472722641778	0.055491643423606796	-0.18202473232378047	0.03234610720327602	0.07717707002830121
20.319	0.07289222834232145	0.06638743837190031	0.12095500446269902	-0.04174058399263636	0.05239155388295025	-0.18578316493448366	0.03225932209164739	0.08510247613275101
20.318	0.06267245423884038	0.07178899146477757	0.12102435614330176	-0.04303738742562402	0.04928592690197231	-0.18579492540554554	0.027431171430577272	0.07593941591772246
20.317	0.05292653276140857	0.07390393896726621	0.12269575084723794	-0.04425361910854786	0.04793020489524924	-0.19014795126936868	0.024726657786503736	0.06305485709324543
20.316	0.06395668017882006	0.07475235935191193	0.12575288157662712	-0.0464830403950085	0.05335330263110016	-0.19551361734111694	0.025871947605570433	0.07581856600233383
20.315	0.05834425825069367	0.06688296209844857	0.11838310658785467	-0.04594451303961211	0.047862172323264396	-0.19067964819123429	0.02484646963778836	0.05484833802941491
20.314	0.061917722671362974	0.07082656672847598	0.1150711470818111	-0.044296328434441534	0.048065865655647855	-0.19021126280016087	0.027124082820665585	0.0613737109026955
20.313	0.051288939506296316	0.06247435184167749	0.11103852377257528	-0.04265098176912385	0.04415485551858911	-0.1873156442852748	0.028942793791554067	0.038990044584739536
20.312	0.05874271909759976	0.05413425264343541	0.10922049150018331	-0.04203150416203094	0.04481808694644851	-0.19466375145127657	0.033463542528346935	0.030220294574359485
20.311	0.053881626098442936	0.05924495565622845	0.10739270627291919	-0.0403645129145751	0.04779226775214873	-0.19722756944592135	0.03668253924204823	0.03071947341924286
20.31	0.053352208630284004	0.057270560746757404	0.10516523850898185	-0.037507638602519044	0.04810498843028643	-0.19504029707660298	0.039720400855571825	0.03134506063718767
20.309	0.05417951226447304	0.06622024818818684	0.10280856933783866	-0.03574137880949291	0.05250722170555555	-0.20269057254125666	0.04193772553765207	0.03728360014530452
20.308	0.04694714619887286	0.07057712991317988	0.09827740439486554	-0.033564701681921605	0.05221523379703186	-0.212437266504228	0.04169366330759949	0.022014946117800527
20.307	0.04764391588421102	0.06081956666968136	0.09841972030708757	-0.030491993181906984	0.053623262312929576	-0.2267053091264648	0.0447498670782025	0.003309162865537729
20.306	0.06291797917706887	0.06114168259096697	0.10054131097419461	-0.029356111533598295	0.05879140947346073	-0.2413958742758986	0.05080509296056501	0.012640396406194299
20.305	0.06567780478886753	0.07087121339411784	0.10094286801592567	-0.028607732442893052	0.060509852389038166	-0.24947103304800322	0.05294129811312143	0.01992297309705293
20.304	0.06060264756399647	0.06438108254135777	0.10319367910272348	-0.0275571560309551	0.0595290775535684	-0.2493832964744973	0.055639069000459784	0.010766034256193713
20.303	0.056234224966753565	0.05441176768514744	0.10425083747570785	-0.023452366651254053	0.06028497175973868	-0.2566435842049417	0.058176603904107616	-0.004914148968848231
20.302	0.032770551791980296	0.04767235637278322	0.10491521303349494	-0.02082700759793088	0.06139714687446585	-0.2546891447634074	0.05676505700943224	-0.028760884288614008
20.301	0.02805091658253467	0.03166198936186948	0.10749069878985917	-0.01797441770011421	0.058321777475254244	-0.25274322876149213	0.053611963398871865	-0.045192264252088776
20.3	0.05460338226451977	0.04198226751967482	0.11210912326181965	-0.01647195207119978	0.06344391817356776	-0.26411145469858877	0.06168069944035892	-0.008444715550206539
20.299	0.04671471043486619	0.05754697439047174	0.1145684494657031	-0.01623147443469808	0.061548224230338455	-0.25754009382286913	0.060544213004861014	0.006606790263812279
20.298	0.035316678469146545	0.07129988351562311	0.10963606582267449	-0.016372263847985735	0.06317884001499774	-0.24381094769478473	0.05583727373789227	0.019248256279671416
20.297	0.022612385768240095	0.0583326931023489	0.1092329326279522	-0.012618381455370198	0.06267613630109725	-0.24122742588098411	0.05394841773431214	-0.000991659536715872
20.296	0.01785555179492615	0.05224737766571508	0.11195460642566779	-0.008095567801557735	0.06340343185234953	-0.24744159411698607	0.04891422539318402	-0.010076194179885256
20.295	0.005708746461947634	0.05515804916636746	0.11152910921285208	-0.0046842941270206495	0.06169739038300559	-0.24829417146162136	0.04804246394350198	-0.01888517036446924
20.294	0.009907183109419293	0.05861487912827368	0.10789316026925544	-0.004770933874453043	0.06354249141795965	-0.23550780062337662	0.051320984946891635	-0.00032102057292160424
20.293	0.002389081659497805	0.059401162648463846	0.09769884594872202	-0.007546598505531854	0.060898603371144944	-0.22017740739120395	0.049431313511673736	-0.007336312268907186
20.292	-0.010748237090075108	0.04974402759202157	0.08693439683848592	-0.00906977786415375	0.05618018218934928	-0.19963234562210452	0.049868319342108336	-0.026591753956476616
20.291	0.007516838222032973	0.05313798297432282	0.07923363488474244	-0.009008169960915247	0.059308079561416704	-0.19017743808237064	0.05220690238100989	1.0927599229049179e-05
20.29	-0.009351191821649785	0.04941421783207023	0.0707404082982821	-0.00906574753350764	0.06008702226098794	-0.18409495138208953	0.046670268113413904	-0.022270242345906688
20.289	-0.02972290341520889	0.03577358694510391	0.06150745845874539	-0.009839616014479802	0.0576356053545366	-0.16145363046578254	0.04572177082180229	-0.04609949913708533
20.288	-0.05989993877553079	0.025653272235726554	0.056193132240809796	-0.010103762892948787	0.05636625894270164	-0.14576108655600173	0.04072581595617031	-0.07755212480524332
20.287	-0.05633109029828631	0.011834688172383423	0.05576262252741948	-0.008008875550122418	0.05757324639327255	-0.14870865306594183	0.04325137986140071	-0.08787806182127511
20.286	-0.07454817142635584	0.002144021829667331	0.05234547691029601	-0.0067423244319746445	0.054678398214035084	-0.13495222620881098	0.03683909482547243	-0.10707482511314304
20.285	-0.08389528238851884	0.01170123161003822	0.05248611305580919	-0.0031457787417839	0.052642798329384455	-0.13677473487182024	0.0343584001024162	-0.10698565300689111
20.284	-0.07629809458547587	0.02263919511717205	0.05896379770808391	-0.0030964757755667094	0.05664906004482617	-0.14708468107326933	0.03164131426608119	-0.08822719856422978
20.283	-0.08736241414972579	0.016121313686174865	0.06265961182340529	-0.0050603740632624294	0.05532952942622149	-0.15151495342245003	0.029032940545739017	-0.1098272866996366
20.282	-0.08063855119954155	0.02735911603750729	0.06765525829239305	-0.008219779168360475	0.05954260850680804	-0.1524216672687242	0.03141785086344573	-0.08672301479991784
20.281	-0.0964530460403612	0.0300093797873906	0.06771630407374651	-0.011375872863155223	0.055416613594647224	-0.13921181659304338	0.02893579244683142	-0.09389843804077547
20.28	-0.08160287778803266	0.0259511182424097	0.06969344296493851	-0.01156056295142438	0.05528072244340443	-0.1422490912487202	0.02912658429981363	-0.0844872483374246
20.279	-0.06769451297314699	0.015497193440398682	0.07151406192523879	-0.013126798566334585	0.05846180467989992	-0.1485353016872395	0.030143281838435065	-0.08388355318118368
20.278	-0.09054645838732966	0.001162042014736464	0.06485362545377438	-0.013347530799515894	0.052021691607435194	-0.13033439955612103	0.027151091092839863	-0.11619102966702055
20.277	-0.06752910016441671	0.005781755911698383	0.06601846346835494	-0.012007464950816171	0.05400951473654825	-0.12171498242170387	0.028212219308727526	-0.07544181342033518
20.276	-0.05621587967084629	0.006728660802687969	0.06529469350942207	-0.009790072068450506	0.054843506726632185	-0.11680339386186578	0.029953983045316157	-0.05594248456242035
20.275	-0.0677773076344792	-0.006666419597544326	0.06537867269045439	-0.006637141394561397	0.05240665328479288	-0.11459348425459748	0.027932019969056476	-0.07788902690593513
20.274	-0.06590926961303101	-0.026279121091596025	0.05810212031712947	-0.004714732449602188	0.052452741394166225	-0.11237695420613836	0.02885817077424946	-0.09872521564907188
20.273	-0.06960559635437669	-0.03178825832195731	0.053002525976245884	-0.0038821829107789085	0.04972491599668505	-0.10407124112746047	0.026759429975247606	-0.10661983674164244
20.272	-0.04803209214652693	-0.03986179119704758	0.051863993249520846	-0.002985998424636982	0.04563653164930592	-0.09791359879455186	0.029278643818580363	-0.09129295566393658
20.271	-0.0449799103977675	-0.029581241830136662	0.050764483695987295	-0.0036277879246187084	0.04356753950724279	-0.09494071973163987	0.029198441628773608	-0.07879763668093265
20.27	-0.038710199268394696	-0.026889314883555393	0.0512484850760373	-0.0056598966365069	0.04431330485760565	-0.09810161519212901	0.028817132003067236	-0.07379923604694305
20.269	-0.0466830648379597	-0.025336261629361978	0.0489772822016068	-0.007084031090054843	0.042221501716855236	-0.09034894711549413	0.02380901505666433	-0.07825352075440861
20.268	-0.05398887458617008	-0.03810851745247934	0.045368059535803695	-0.006115300119948763	0.043939652735072166	-0.09345222107140838	0.018845568600563745	-0.1023572009591307
20.267	-0.05639901051010998	-0.055120569730192415	0.04978844696843332	-0.003610901168296543	0.041538477855163514	-0.10706781567600476	0.01851698823200909	-0.13087137226100687
20.266	-0.05279725620897224	-0.05339926418643515	0.04731504601963277	-0.003399043055733131	0.03901337402462257	-0.11226438209318701	0.015645488896939064	-0.1355315255000722
20.265	-0.05366440834301667	-0.06211611222115376	0.0454528016982465	-0.005754950053502128	0.036224166172893923	-0.10497108734204019	0.013753384752718922	-0.14482959008857232
20.264	-0.049716806658927304	-0.07213920740788637	0.041669465655604476	-0.007861045635956465	0.03249449619476863	-0.10175517419635582	0.013626798375465654	-0.15730827204875286
20.263	-0.0602218035999984	-0.07951324283515326	0.03996902534290481	-0.008295556866876552	0.029139726767651197	-0.10837138278454272	0.008997643471070127	-0.18729323397601494
20.262	-0.04141979557067099	-0.07989465268424212	0.04597941107028003	-0.0053629747766157365	0.030637027136175554	-0.12429823864206835	0.007520311343821362	-0.1743592234671416
20.261	-0.03702596044764661	-0.05917255217738404	0.05446580385994171	-0.003023967074431866	0.03386815587675773	-0.1414319716835193	0.00298175277689694	-0.15232049164628236
20.26	-0.037828283414932606	-0.04898324994390357	0.06084134694332022	-0.0011376372540565782	0.031787145587215626	-0.1535194521361678	3.408995404452497e-05	-0.1488401302185247
20.259	-0.021992295273465245	-0.03895189757016215	0.07035248910519964	0.0009091261673637163	0.031977330467855225	-0.16964050031136768	0.005509226960782598	-0.1273457474145765
20.258	-0.009604129137753326	-0.02360668783374198	0.07540903618372763	0.002113507806139836	0.030746952579079334	-0.18387555821777735	0.004101068800940411	-0.10881687862032585
20.257	0.027563386096843168	-0.020271870947818904	0.08029908756435766	0.005162326180482069	0.032357187880172944	-0.19689558275576413	0.010771055733074242	-0.07178546598172719
20.256	0.04907600425730774	-0.012106650298226995	0.0795973419761431	0.006988351105031931	0.034229361717941664	-0.19659354859767575	0.013036562924347628	-0.03880913983947831
20.255	0.05610828608855645	-0.0027418391104907514	0.08090090438448971	0.010460039708934055	0.03473102418921847	-0.21089329354713904	0.01924364511651877	-0.0314348782864311
20.254	0.055174206137367676	-0.010613613645489295	0.08063327933552067	0.011855082381598159	0.0331093328808727	-0.20273056291062463	0.021689135333801346	-0.032572275820754726
20.253	0.05080507439582416	-0.010173447095458421	0.07634049733802328	0.012136506824509397	0.03297005621868454	-0.19843115039317727	0.024631574548944712	-0.03635246271159431
20.252	0.06026869477603647	-0.0030828973668572957	0.0758566374948968	0.014526801433663472	0.03437208388552371	-0.19604878326337705	0.0287919933287224	-0.014107463040113899
20.251	0.06427803911436758	-0.013536926661765314	0.07367054803056394	0.015210052715017852	0.03071104031495331	-0.18791616078094897	0.02909246065442961	-0.0175834072678116
20.25	0.08223127835613475	-0.0034674634167188856	0.07092592486613558	0.01467190605468538	0.03316773856480992	-0.1928467559399225	0.03306858438395732	0.004682628485124241
20.249	0.07107158338982345	0.0034781513675383735	0.06628611123226325	0.01121597943455388	0.030630771065714768	-0.1817835823230114	0.0265800006106911	0.0008990141668823171
20.248	0.06432250696104713	0.015141616144152437	0.06294118750918098	0.008301690378995197	0.025092417622150975	-0.1748574851982605	0.021753619721098794	0.0009419334172662275
20.247	0.0734210162094433	0.009427369463656632	0.06400343260721186	0.006537766212411533	0.024072169547269873	-0.1769769967253323	0.014658476948488541	0.00048475731466091077
20.246	0.06493647974257488	-0.004616953906180221	0.06074422950725644	0.0041896441408191265	0.021268939019650546	-0.1714449552196582	0.008440844776782086	-0.024922616715537416
20.245	0.056588486310347186	0.011654921708668553	0.06097494264621783	0.0016680498464403115	0.01980261360356117	-0.16415329218060037	0.001794208399586772	-0.01346427806536532
20.244	0.04916725972342206	0.028895573925621143	0.05900816598561587	-0.0008510624610345019	0.017240603473901217	-0.15767806691890485	-0.0045207394509354515	-0.004217526271379057
20.243	0.04101817899445326	0.04841211560747816	0.06440097845773174	-0.0009621017931529252	0.01603602262259507	-0.15934658791139267	-0.009464434591459181	0.009558605977712631
20.242	0.04483906256482317	0.061006190298159346	0.06824795867376032	0.00044797674029695145	0.01715996031941458	-0.177929391200653	-0.013801999097182716	0.013771757395801387
20.241	0.03174938457591914	0.07236918299035633	0.070628424137543	0.0013315354456260309	0.02197241958556706	-0.18854474557139156	-0.018382549968129602	0.009506201163619998
20.24	0.04341071609956515	0.06296971648172178	0.0726754294814631	0.001782400075269308	0.022587445707353382	-0.1935654896824941	-0.019866196949534398	0.009860218162878631
20.239	0.040360585190762244	0.057916494890998926	0.0739087632623896	0.0012491932830585029	0.022185650519681133	-0.1936810487698759	-0.021066414082397067	0.0019396383770144965
20.238	0.027994947836031514	0.05226933337586992	0.07362985724547588	0.002397851684617258	0.02411569464840113	-0.1960903634782616	-0.02528088400511397	-0.01568267868786588
20.237	0.044929308437373194	0.06136354312231518	0.0764975786124138	0.0008050183213548223	0.025464271473500055	-0.20099969272022555	-0.022385730097197687	0.008060027246731494
20.236	0.06387017236449921	0.06552661104255364	0.07513209566668255	-0.0023638383702557775	0.028761781955352284	-0.19829847531047928	-0.021198484531431916	0.032628347348352627
20.235	0.06588207918642208	0.07191056300127219	0.075352806181062	-0.0045829035863267364	0.03071829231301937	-0.19673483555854343	-0.018880949636646882	0.042546001536905464
20.234	0.06269612867074414	0.07237370939915255	0.07438506189760563	-0.0041453898303238645	0.03026339474741313	-0.19286007741825273	-0.016540110659573948	0.042712827466338865
20.233	0.06378061790300116	0.08516840754292776	0.07473270373195451	-0.004037190965699544	0.03044666226956494	-0.18749958110138998	-0.014330433591141833	0.06259161938035884
20.232	0.07404380494915852	0.0958359542183338	0.07568708693372805	-0.002642131320828689	0.030470858010497537	-0.19003728942180675	-0.010284091112913174	0.08335828336908246
20.231	0.04621051658248376	0.10599952829731052	0.07086290495648395	-0.0011963462477586617	0.028457958246949744	-0.179097983942345	-0.012385610110132284	0.07123657789312432
20.23	0.04097968706499433	0.08780820618511775	0.06693302501089793	-0.000743241245035442	0.02565487626689844	-0.1763483200560234	-0.011834400280910096	0.0442842332268496
20.229	0.03423820464322791	0.08177594405668387	0.06693776841069443	0.00020939357099347689	0.02522646031617537	-0.1745509893398145	-0.010999418168307074	0.03383678165796056
20.228	0.022708396111080553	0.07908143502884091	0.07022546647113881	0.0013946326256126795	0.024996681399318987	-0.17956273759281238	-0.014996776064895911	0.018843874043179554
20.227	0.016598198591151636	0.08109744460179424	0.07398511471002145	0.0026554973000587623	0.02748012085303575	-0.1839669913377282	-0.01792076165792089	0.01784938471833364
20.226	0.00011156010773749614	0.088354003796276	0.07762680641208064	0.00291597420463674	0.029043611349308662	-0.19216240268158735	-0.02411471690543987	0.00588955318845219
20.225	-0.01107477171987803	0.08682132410310395	0.08094332794993342	0.003464442859214323	0.029828156386274784	-0.20625297617588512	-0.02931920408908617	-0.016270496597236672
20.224	-0.008875805706226814	0.09152111989836964	0.08003575602516744	0.003342065395044891	0.03271918666185858	-0.20516073753489916	-0.035463257243512736	-0.006418415260685428
20.223	-0.02010705895455267	0.10453003448247866	0.07764679769562921	0.00370733319336658	0.03092827714779034	-0.21511969534377684	-0.0431039856404114	-0.018414311779064718
20.222	-0.026877614947540707	0.08553220484913737	0.08000229114124835	0.005298215990387156	0.03007986292608056	-0.21865902536517812	-0.047408987874644204	-0.04462406540586539
20.221	-0.01692067283591392	0.09478697461866492	0.08159086515582814	0.006974107498803228	0.03068020104787106	-0.22542817600724252	-0.05173125736488249	-0.02831670052198909
20.22	-0.009783489338367701	0.09657106937903759	0.08220593077018101	0.008092549716515407	0.03591924292593163	-0.236831681765044	-0.05388975457442147	-0.023826378311746055
20.219	-0.016595290562934295	0.07969377076088957	0.08538333475114257	0.009816392109337713	0.03492608447308054	-0.23566683167215619	-0.05901389794867562	-0.042442540140640084
20.218	-0.015654809405351244	0.07176069277244412	0.08682864282387559	0.01202447387292871	0.03580437998150021	-0.24299424323608054	-0.05782405964313053	-0.05223086319068315
20.217	-0.020516631488688652	0.07013710677667184	0.08895311614645873	0.014020331394845265	0.038209512395683376	-0.2368078021746891	-0.057823393080512986	-0.046004366949718545
20.216	-0.025071464835215274	0.08293034244883035	0.09143917658004952	0.01493830099276039	0.039928811214053006	-0.23401751526903247	-0.05512929972978231	-0.02985234886855448
20.215	-0.029347797119267938	0.09171266158438574	0.09363806348841752	0.01394053580494603	0.03717439332761163	-0.24092491688121598	-0.05292313707943119	-0.033807059795122996
20.214	-0.0392884572095884	0.08505985426178508	0.09215934848364782	0.012847738470821213	0.03446344278078861	-0.2406308988463426	-0.05152546675123837	-0.055388972058888264
20.213	-0.027270704401844093	0.07477149589567933	0.09347606452820845	0.013160614656816172	0.033918288093931714	-0.24969545948201244	-0.05012735617015007	-0.06163970070922087
20.212	-0.008031815678820386	0.07692728804279092	0.09702241691419289	0.012822592632180552	0.03624608365059778	-0.2579510455766414	-0.04484248630186727	-0.042964480015699635
20.211	-0.016538584833588388	0.07277852628128745	0.099749465056715	0.012266995293137128	0.03740567502916914	-0.25091792924753165	-0.044965433849450065	-0.045255852420811316
20.21	-0.017085128696678886	0.07188976393534752	0.10076770048805717	0.011647841590860963	0.03688292815633787	-0.2520842684575104	-0.04509714695512823	-0.04798116298358579
20.209	-0.01897004157396953	0.07750198399123498	0.10337136148119885	0.013217493148917292	0.03917782355581778	-0.2609987801348552	-0.04485541081399891	-0.04670015953165585
20.208	-0.019503759797152576	0.07259700151254567	0.10569703592535262	0.016927902436454367	0.037748718642134804	-0.2655105760417076	-0.04654541237233456	-0.052043677322372695
20.207	-0.014629487872329427	0.06781013496769273	0.10569084677605378	0.017269725401400038	0.033454597066275404	-0.2650209850923382	-0.04431705930210317	-0.05542516875324566
20.206	-0.004932140196300949	0.05583200007361366	0.10507173545504322	0.020091904673869898	0.0346307381010762	-0.25945990958234777	-0.04236596581356711	-0.048765671475045735
20.205	-0.025490774053173126	0.05599238079775848	0.10689113768147074	0.023418382570506324	0.03162095520350672	-0.2565966030083988	-0.04605130199875607	-0.06416452080832968
20.204	-0.0335882457429344	0.05400664755638562	0.10897801781303507	0.024794879284022464	0.028842206329969144	-0.250645386374984	-0.048346799845302435	-0.06761188113450611
20.203	-0.01795798619776079	0.04955123857372534	0.10819695106930194	0.02513757566901731	0.02943898404001999	-0.25147591144305004	-0.04880292860945801	-0.05710914828874625
20.202	-0.023978945725649403	0.03586590961548097	0.11022188097283703	0.026957472655325	0.02988940923435557	-0.2545403656252674	-0.05291798467415365	-0.07558463887291822
20.201	-0.0232391422133702	0.021159428993446916	0.11257826266758908	0.027613729021942923	0.02853342202889042	-0.2526468376292321	-0.05637013500536536	-0.08600113713073299
20.2	-0.011105541608877445	0.014903703772331411	0.11353379556265786	0.027322292790100455	0.03154901627719031	-0.25456426232987095	-0.05366197658749794	-0.07836099553646836
20.199	-0.0012501382501275415	0.03235061039668352	0.11390487429453344	0.02685286229584527	0.036407233971866404	-0.2608449202376848	-0.04984583835082823	-0.0525794775288837
20.198	-0.015215587253242013	0.045446536074850385	0.11554788465219179	0.0263091277031533	0.03842061573453304	-0.26303729807675147	-0.053118349561296796	-0.05252872116526497
20.197	-0.002689563284579144	0.03497538584118143	0.10992019453204627	0.02529170604733988	0.03710447576205489	-0.255437616110072	-0.052503450789090245	-0.050835417212028666
20.196	0.02244412638768445	0.027000699675564732	0.10674886924508531	0.024208178681151438	0.03768807641620775	-0.2518081747499439	-0.04385369216151247	-0.0337182243442502
20.195	0.020393079676490622	0.02429961287311766	0.10321392820332687	0.024126609669878007	0.035544777828230956	-0.23686284929037882	-0.03592889075594741	-0.029284841039334708
20.194	0.028234628509268056	0.044551879221033985	0.10124368915698057	0.024429014352122636	0.03610168506404143	-0.22564089851276137	-0.027084103680513394	0.008919997790685308
20.193	0.02390627630413178	0.03795440146023665	0.10085502709969596	0.022426772690526064	0.03213661648074595	-0.21871226614149464	-0.02448173013421684	-0.0014331721061582314
20.192	0.024889388209476948	0.022968005629694588	0.10136448207814208	0.02009614234986845	0.03157915554283708	-0.20347026211349828	-0.021026613282983497	-0.002573088303479132
20.191	0.04286217566235084	0.032845243126604196	0.10085602233194901	0.01810737682110286	0.03383543585450699	-0.19700032803426204	-0.01492306148248268	0.03150592576225186
20.19	0.023401528251325132	0.023556945241554494	0.10086028941822	0.01584664009275283	0.03198064350035068	-0.185428948456007	-0.01541480121681893	0.01021709804819615
20.189	0.01188579501120035	0.02739796025400487	0.10123332136910967	0.016585893268676877	0.02834859549516544	-0.1807672299499723	-0.014280287126188895	0.0046843354481849175
20.188	0.02213995174476846	0.0340330147529464	0.10222553437377968	0.017824509386612952	0.02951946365041902	-0.18217070006885727	-0.010154961621955394	0.02357177383966924
20.187	0.02881551069634991	0.03318277740752951	0.10507691275781639	0.017927574915406197	0.029114044012892748	-0.18078234483079747	-0.008249258785730795	0.03333447495919728
20.186	0.04279150309738888	0.027989758790372576	0.10831094340782066	0.01976191971521235	0.02901408700391528	-0.19163090128361127	-0.007380922611556429	0.03623731073109848
20.185	0.04199143118998716	0.019940220562116195	0.11086706782162636	0.021769302821692094	0.030334695353718466	-0.19503410074440009	-0.005598802770339972	0.029868617004740194
20.184	0.02920104623197073	0.014702413114914492	0.10684258371313415	0.023457820086127512	0.030872712253122714	-0.18095272511415494	-0.006152202382830652	0.024123850285114656
20.183	0.030988971226648232	0.0263289698494118	0.10392130408495426	0.02449407328260733	0.030887879913246152	-0.17650039392004047	-0.007386306387710206	0.040120804436827306
20.182	0.028796814562556783	0.026750002640771875	0.10209020000318603	0.024610698825546784	0.0284166761961	-0.16622791829758743	-0.005426548899406747	0.04443647393057404
20.181	0.02049143638636597	0.025292389512782343	0.09579949005613919	0.02452614155055155	0.026235022518252826	-0.1576998132174241	-0.005631245760320702	0.03464466680666778
20.18	0.02081267184761959	0.037932630595139294	0.09163895053290982	0.02584702939752148	0.025881109078523146	-0.15781057845398117	-0.0029102223069639166	0.04430181299773217
20.179	0.017956180387455056	0.04303204651328585	0.09038705807309189	0.025332025172709827	0.024917296012013423	-0.15044685607571662	-0.0022771758367596817	0.051177750082839424
20.178	0.02333156342338949	0.04526324150692318	0.08801781962104549	0.02612799935923693	0.022969126426115594	-0.1476937455299474	-0.0002595324915057873	0.05801600480676328
20.177	0.020423724614683003	0.052717654829466554	0.08059801986684967	0.02574140497991184	0.024122155727805072	-0.14513563896787485	0.002239195732556709	0.05846732105084129
20.176	0.02702108044595608	0.04880316725933831	0.07754323906736538	0.026448226959826293	0.025654173304307193	-0.13884759427681193	0.004528892778609794	0.06662229275998133
20.175	0.014534392235883153	0.05160752502943211	0.07330393109236066	0.02430647324175972	0.023056122131814405	-0.13216425622794858	0.005143748968349904	0.05464418750330147
20.174	0.031087508071160563	0.05879981708672144	0.06939741351213069	0.020427704767214117	0.026281944343672592	-0.12548092110499454	0.008251920229520593	0.08051346667590487
20.173	0.0251244116497622	0.04762158827971863	0.0636959090562188	0.018196229784043894	0.024021595534027718	-0.11494085992060388	0.005851903564126459	0.06371887438316737
20.172	0.017000732807641583	0.039986039062188894	0.06200798557977816	0.015919353664819447	0.023844675966006257	-0.10714171828199426	0.008353966718490646	0.05161706879844008
20.171	0.01874008508585323	0.05191867169737385	0.0584563779510745	0.013748443271708766	0.026282592911608837	-0.10408260448174111	0.010984443523303078	0.06506356643587807
20.17	0.016561526456902342	0.06035499418259338	0.0537044887044269	0.012427901143968079	0.02686227433957722	-0.09562189615139616	0.01310900324533737	0.07428928867607176
20.169	0.016406674586701087	0.05909326506325829	0.05021551407047031	0.010424311480534243	0.025164247479906976	-0.07757237809779394	0.012065758208077426	0.08373163458307697
20.168	0.0073822530863632	0.05424333284900307	0.04573865241685926	0.008438301853027852	0.021838091837673268	-0.06327424899685763	0.008235235850387213	0.07436638304606902
20.167	0.013223974578544961	0.04563102777781047	0.039023276030933474	0.007679249369117791	0.020365585807017972	-0.05774841593741531	0.009458160448496677	0.06817469762600936
20.166	0.016119808690779003	0.04188463763766137	0.037440471006360276	0.007507237370202091	0.02235028610013856	-0.05569605376579645	0.010813918308318016	0.06960638703934485
20.165	0.008145390857025703	0.04747392533309469	0.033176348468240136	0.007057343917784564	0.02279264670912795	-0.04784916132344463	0.006277309143358778	0.07079649396182841
20.164	0.004349174729930461	0.051145413609114065	0.029888764782649346	0.004005576463472771	0.021663215927405943	-0.042305941069860964	0.0016270800732183233	0.06874620444271162
20.163	-0.012374775961291995	0.04344184277224006	0.023597738856836692	0.000793078064539543	0.011879051661793483	-0.026016636947139737	-0.0059870284130800755	0.04132029844697804
20.162	-0.014509586729920088	0.035701512484959785	0.02255295364383958	0.00011663675115602956	0.011009127150797937	-0.02444156262101327	-0.004703023661757122	0.030429080679819975
20.161	-0.014135512652797999	0.04823842682768298	0.02038982185086269	-0.0006803257916372374	0.01184522457180126	-0.028833812455342667	-0.0020686942537766484	0.036823822350569024
20.16	-0.03129389917260994	0.04395029860152455	0.017260589649043645	-0.0005211618924656491	0.008740896875568893	-0.024426181880839337	-0.004774766084296722	0.013710542180222163
20.159	-0.016639868851560102	0.04537540166590759	0.01196144207187011	-0.0028152276569430867	0.011486410088483723	-0.019126242642281355	-0.0003613016799786095	0.030241914675476878
20.158	-0.011331206846769248	0.045433608679130266	0.00853435150360049	-0.004745785364711708	0.012983100715340257	-0.02009286832558388	0.0016796291283149856	0.030781200361006178
20.157	-0.021873977527222976	0.047947929011579404	0.004291481499016925	-0.005881021600798064	0.0032796104042027707	-0.003090905675482425	0.00029064063176065247	0.024673116111295634
20.156	-0.025730681122936083	0.04746042399175199	0.001446447385360372	-0.005760740412214638	0.00373736896390664	0.003124447695016741	0.00010977155797053939	0.02427726650088502
20.155	-0.036091511130686094	0.04764036144353412	0.00034119509872887477	-0.005501790361529757	0.0029981890390295973	0.007631075403290666	0.00020096360944066305	0.017017519492367406
20.154	-0.010452257867884285	0.04861575056468048	-0.0029598800254717617	-0.007372634715435922	0.0008613824453824748	0.008972978229587092	0.004132836510784443	0.03766533863085808
20.153	-0.004464931775254755	0.03716862262695475	-0.001319357710008795	-0.008175985266212216	-0.0010708062813877817	0.00937284209745215	0.006854999999482025	0.03151038369154335
20.152	0.01336850090167907	0.02898088545628852	9.121085639662851e-06	-0.00923030363067845	0.0028388134408938726	0.0050797915110258884	0.013271550402612853	0.041046808764848564
20.151	0.01888627422110911	0.03062700849699862	-0.0002355238113338487	-0.009973724041077325	0.004071003923642458	0.006994304208067348	0.014062300710193654	0.05036934299740636
20.15	0.01810028214444781	0.025572323940661335	0.0018059548251745383	-0.01217967099142836	0.002899497407379492	0.010727441304996255	0.013225382878923497	0.04692582863123107
20.149	0.016392895313468436	0.0054097256667455795	-0.000906332938146015	-0.015760766475563237	-0.0020447383793378293	0.02096752279839098	0.010653066851493698	0.024058305985557915
20.148	0.013493622803682825	-0.004246410132525469	-0.0028577203121509243	-0.01688947492309545	-0.004275466587944976	0.025007114305861222	0.010764452118414702	0.01023166515382723
20.147	0.00829577312967178	-0.017989358846577375	-0.006020194911178223	-0.020046872945225225	-0.006461633714171633	0.030979307787818655	0.009306441030465962	-0.01124297949966202
20.146	0.011711422688501116	-0.02029298336998142	-0.005360593083698184	-0.02310770991916211	-0.004974811363739562	0.03568734119637895	0.012609462679498584	-0.00633733385170121
20.145	0.000490263601998997	-0.008961889412788082	-0.007380526773281382	-0.025585711128409017	-0.004505631459521986	0.0441278423259881	0.009674291986391914	-0.0018156528460133714
20.144	-0.014727669694872603	-0.01246682267404875	-0.007543824501326846	-0.027025588064763184	-0.00537217785295141	0.047685920676787674	0.005222479563869342	-0.019450162111175118
20.143	-0.009902383025243822	-0.017524514854986073	-0.005928109471848408	-0.02774814960374261	-0.007442952257652458	0.046463097773697726	0.008496035690741088	-0.022083011439775646
20.142	-0.00856331420713019	-0.0077784221449173074	-0.004661491861506661	-0.028438668293042646	-0.00588009486417107	0.04181126146746994	0.012092122916234516	-0.013510729903297936
20.141	-0.003657842534422251	-0.006222620012418467	-0.005467133394241763	-0.027835342660432083	-0.005844650786981376	0.039399691183056085	0.009668639249522215	-0.009627898205439855
20.14	0.009434724547491946	-0.012742688322352258	-0.004119032356499908	-0.027266906271876223	-0.006202380902989191	0.03625515204758667	0.013430530492080095	-0.004641131258638964
20.139	0.013218707790623618	-0.012147105478195641	-0.0016030350847850983	-0.026784363370819797	-0.002300456373879989	0.02668038443343157	0.013318235018251912	-0.002935868083625337
20.138	0.01469114424725948	-0.008066187160328475	0.002686412808852623	-0.02493726615946734	-0.0024318603339956724	0.013788933103682233	0.013450789116488338	-0.004268823493997154
20.137	0.051424110844583204	-0.013362743766339946	0.007833351413582434	-0.02289693775267665	-0.0003290491424410291	-0.0018421414514637746	0.017569252422982906	0.02082659014524424
20.136	0.07656013065826617	-0.013844163139689947	0.012522775598267089	-0.022407330678985815	-0.0003563451976305032	-0.002244535535153247	0.019298939998935616	0.050230531705073744
20.135	0.07111683222637222	0.003183763442621057	0.013248889600166791	-0.02299773510553127	-0.0028072708842881156	-0.0009056270095513241	0.01678177495156774	0.060838852269789356
20.134	0.062079194356957856	-0.002206762936313389	0.014058271167204595	-0.023212383893693733	-0.007759899829717476	-0.000636916355546191	0.017902415275280248	0.04232150250889166
20.133	0.05971316087868672	-0.025661936644657324	0.012669923230097524	-0.022094678221195707	-0.012782493891636548	0.005858898438177995	0.016948681892378303	0.017702873789472662
20.132	0.079199331541008	-0.0421515068973779	0.015131555872584634	-0.023192867656615768	-0.006310051098027181	0.003166924272746563	0.023465633606569725	0.02584338603431835
20.131	0.0943757339082909	-0.03162537687222233	0.016775078294105406	-0.023841547398234297	-0.0038973469835026364	0.005120204601165135	0.027844199448890272	0.05690674554960218
20.13	0.09456475502772577	-0.036797768755494786	0.017482900838138526	-0.02133137576113331	-0.005091233438981213	0.0041292693017158655	0.030372592960559608	0.05295654721197085
20.129	0.09652100140472708	-0.02774056478649989	0.021180955550856417	-0.017686747525623936	-0.0044456674378619	-0.0065609612797938865	0.030979041895772497	0.06126801592580389
20.128	0.09187781740929246	-0.045733528334614526	0.02513675579933583	-0.012410384525056273	-0.007133050516316963	-0.013414227506625132	0.03024051583080034	0.0383233823260154
20.127	0.08660972220263119	-0.04706405776116185	0.028413040687268243	-0.008118166649935254	-0.008333818039354846	-0.01300105737528856	0.027572832313732754	0.038505663064158924
20.126	0.08315329338279032	-0.051959949928767735	0.03279081087280833	-0.006125180809667619	-0.0012696047541682631	-0.024265303532940763	0.02793976224101513	0.032324065230054266
20.125	0.08519353096187032	-0.04633896917812219	0.03531947841741623	-0.005588654219732092	-0.002068370731071134	-0.031917244198875316	0.030675939734057245	0.03459977105148582
20.124	0.07836770377652957	-0.039885734028635156	0.03561044620017473	-0.00540198603313069	-0.001936577943627782	-0.0345624690435411	0.03243205709659325	0.032191382927769574
20.123	0.06492900338239771	-0.04712892106367761	0.0370730937864332	-0.005002168334094392	-0.003414608971262112	-0.040234800868661935	0.029737423990127354	0.006221597931134859
20.122	0.0689238719857892	-0.041276289271710453	0.040226830583773854	-0.007502334974144986	-0.0006064124169578022	-0.04045849668780921	0.028700864849542818	0.0193071692189406
20.121	0.048725206569391055	-0.055732774492433634	0.04017229427226887	-0.010159368427435922	-0.004334238334797291	-0.02509776219972437	0.01959736468911899	-0.0064266426127312926
20.12	0.032635883982459646	-0.06006089487196942	0.04041496733849037	-0.011040043462102744	-0.004787066536612095	-0.01876194649456764	0.016146709492941724	-0.021599100044301878
20.119	0.03313171686339711	-0.06874733224287244	0.03916654728448865	-0.010989641681453222	-0.004847304456630397	-0.012874229174529184	0.014261025267666483	-0.02516024340759948
20.118	0.034317289173461774	-0.05556579661238814	0.041630081490512616	-0.012264377668547155	-0.0033972760232545696	-0.0136180246954698	0.013295242809364893	-0.008898104335685275
20.117	0.05419949312893735	-0.04528438580430372	0.04318906638668896	-0.013932937139827573	0.0008148058475176967	-0.0210400870647236	0.014373929454570167	0.01794595535428911
20.116	0.04745409017189495	-0.02757582175291784	0.04368015050319762	-0.015246917690427964	-0.003828187896926849	-0.006730329472910412	0.012609336798064419	0.037752983861909506
20.115	0.06459022823913507	-0.02453855910641778	0.045108195038844556	-0.015749505990918955	-0.003786107784569559	-0.004441764222557154	0.012620405874408824	0.06118248617351618
20.114	0.06550411359922936	-0.03262796861633088	0.045443841341539226	-0.016522891734289225	-0.004282320808352225	-0.004186916167999932	0.014685628952281427	0.053327857613796326
20.113	0.06173785102988205	-0.024614848252868526	0.045861713141027494	-0.01594642543608238	-0.004537139685452551	-0.001905723884781274	0.01594205349556521	0.060595426911724815
20.112	0.049317310177059426	-0.02338958507211686	0.044017925132907365	-0.014832700952397637	-0.003906837591162393	0.0017537645171064042	0.012209406804291056	0.052959876211396306
20.111	0.0562318995893083	-0.021846919429014733	0.04324543993288632	-0.012552842327650637	-0.003640981024001455	0.007109141157733312	0.011687974624953412	0.0685457378992611
20.11	0.057440640688906086	-0.0088388545216036	0.045569973697249466	-0.010950005080843539	-0.0011426585741798334	0.009817879654748118	0.01112467140692086	0.0918969758642767
20.109	0.040424032519139175	-0.007153431599614457	0.04620658578780645	-0.011766149460481934	-0.0029211514371043634	0.015427938810208985	0.00516554954403059	0.08021782461995386
20.108	0.03613061152849717	-0.013695930525118527	0.04907356069063962	-0.012418938895136122	-0.0054767494774425884	0.02473501790830479	0.004771755917133191	0.07834757122974434
20.107	0.03523809338689521	-0.022041806281071885	0.04973542544181875	-0.01279573406289014	-0.004491604961581075	0.026154463245407378	0.006936449500133612	0.07179883676857823
20.106	0.011728533709074007	-0.027402937964965624	0.0502420998817108	-0.01095226529439941	-0.0061889015090583754	0.028031599642390326	0.007688565642586909	0.045458128464751724
20.105	-0.002482365178864576	-0.038935898640618305	0.0514230082353917	-0.010976929475526198	-0.010152902947794473	0.029892729533905538	0.007085347578918544	0.018767641526493684
20.104	-0.008234580143661852	-0.03601965179993982	0.04976842195439968	-0.009285385115682665	-0.007070494105884784	0.02988617344522826	0.011500846543046173	0.019044484234458814
20.103	-0.0035354883451690355	-0.033784139211004316	0.049293869421538794	-0.007730697264073605	-0.003621450057709197	0.030244188981392917	0.012849270037536442	0.030866283524975557
20.102	0.013587387179822663	-0.03190740945214188	0.049974391590819955	-0.006277062635251518	0.001904594137100979	0.01975694557530172	0.01962779516710178	0.04703884639565192
20.101	0.009209381488589408	-0.03334676025187022	0.04884902124347423	-0.0028389315635664047	0.0018860352536247404	0.0181749262061901	0.018556224000277233	0.041933672376441855
20.1	0.013126474087028939	-0.04683046231578203	0.04657077613065308	-0.0003470925262627489	0.0019970678730842906	0.014080389739683064	0.01861969599297897	0.028597152988404595
20.099	0.019807328259014767	-0.039532139410901834	0.04508639077463794	-3.0138100553855907e-05	0.006340618646355267	0.0075533921571162566	0.017937947080432615	0.03922545232566854
20.098	0.029965792500691535	-0.036056286451968234	0.04441919359231772	-0.00018341943833011243	0.007598868880717369	0.004248096489479103	0.019324147338312336	0.04999224557290738
20.097	0.04239905465937266	-0.011094994055526719	0.04663490916671531	-0.001423946730761294	0.011701517823214047	-0.0077596874702692276	0.024095186664280455	0.08045685339274478
20.096	0.05335934195417025	0.001988921397856558	0.04578374792591422	-0.003610642903424832	0.014745487068158702	-0.004955761768771438	0.02576323133477043	0.10731109367390346
20.095	0.05155874020912421	0.008431592238686392	0.04094279323337613	-0.003952367246622401	0.01545241944720388	-0.0035038317980324862	0.02270765927864904	0.10892934608373572
20.094	0.05661785759843241	0.024268090557480804	0.04135959083809304	-0.005293610012601313	0.01698594170318568	-0.0029495887216777206	0.018456081709293137	0.1309882819629129
20.093	0.06000722736366271	0.024684211406878376	0.0379820110785829	-0.006882831137140499	0.017333125967419427	-0.007608549882998972	0.012822469657098878	0.12551519479640394
20.092	0.05888822121046822	0.028549284261930374	0.03669688817660077	-0.007248452500640212	0.019178653068674834	-0.0035437750473796825	0.010265248684240724	0.1325208191696543
20.091	0.05521667666481722	0.029086551657129256	0.03243024777495229	-0.004243911309715465	0.018458610931486596	-0.0138712295866954	0.008241951007510906	0.1170769461319745
20.09	0.057804046562155875	0.04209261836849976	0.029184144470677076	-0.002052086474794379	0.021733863484890037	-0.02447146234211761	0.011419569570299437	0.12429112406931075
20.089	0.041838482293791834	0.04718536918653182	0.023954958927299153	-0.0019640740947837187	0.020060831507983323	-0.018232597538109907	0.009341934677378205	0.11284297028271251
20.088	0.04307514493892661	0.0564313123956488	0.019008112291723833	-0.0020977337496637105	0.023346465577910536	-0.017645260857490186	0.008959050914024935	0.12211804059705589
20.087	0.05563861879433585	0.04696294324149175	0.01765123797574475	-0.00027937006029166156	0.025718337108150635	-0.017622427578155353	0.011510022813284948	0.12806933948127597
20.086	0.07344697518899057	0.03705295528648289	0.015094292530786646	0.001433755190364927	0.028552940280117234	-0.009936593120536408	0.015737526308091887	0.14564432535620586
20.085	0.07715724172186533	0.03741411964675567	0.017185119426031292	0.0017727018272752915	0.03613580827605212	-0.022908436971957435	0.019490663446748435	0.14675655392602227
20.084	0.06345954574451262	0.026531825168016	0.018854771145802474	0.0034351298628019222	0.03571800386102186	-0.026139919288469038	0.01888646975646413	0.12185935649368584
20.083	0.08700443723608675	0.03218937463106286	0.024890558441347466	0.005811401777923386	0.03901687450685465	-0.04212642927991439	0.021415905447006445	0.14678621731336072
20.082	0.10585404565399248	0.027017121782953346	0.026946968566652352	0.005427350661117991	0.04225947699514965	-0.05162616318914104	0.02519549776440133	0.15587880047072478
20.081	0.12454565155872821	0.018243172226221738	0.029674609478365532	0.006040975856099529	0.04391490926581021	-0.06117007967425803	0.031100899355603673	0.1612492387109672
20.08	0.13103251236483082	0.02432844806931378	0.03173635989085977	0.00411358318478694	0.04587027810907429	-0.07283951500285024	0.03339836642696348	0.16424166661601536
20.079	0.13426103391471056	0.018611483993528743	0.030548723872079186	0.0037791363011718815	0.04568120393642783	-0.0799307901597377	0.03551110980522676	0.1529507918581805
20.078	0.1333995683189091	0.02405436908528369	0.030169111251636238	0.005785524058213198	0.04635271546888298	-0.07836501116750583	0.036164064187549805	0.16139627701541936
20.077	0.13029413709374893	0.01983717384870598	0.024682118841099943	0.007044710870721005	0.04552791983500537	-0.07270474029412366	0.035437883907766476	0.15468132019515757
20.076	0.13858530684385606	0.03167740812249242	0.02244912229090712	0.007823185701334445	0.045161373968205076	-0.06486613010125541	0.03469959530481148	0.1808302668255397
20.075	0.12530888859589862	0.04193889263309991	0.021039944769042584	0.006733810181796862	0.04400397986394644	-0.054696682385172224	0.031128397203754155	0.1843288336586122
20.074	0.1133352528356335	0.05107917093398395	0.019410798904581306	0.007858049150481605	0.04609968207122339	-0.0550370691669686	0.026079240983598595	0.18274588472893516
20.073	0.13419837888675623	0.036555939302913565	0.022973717132032334	0.007232373316907292	0.04593801679062892	-0.06244872082544095	0.024831647811936364	0.1844497046037974
20.072	0.13988655397801342	0.035327221789749785	0.027760040691136467	0.007049075077624423	0.048962306608761885	-0.07552152358426856	0.025493785304212757	0.18346367456101742
20.071	0.1336696150559593	0.03808548977583115	0.030907327436332288	0.007760035404070997	0.04766345244626713	-0.07997724650970106	0.02184456603540319	0.17810867360875982
20.07	0.1393236963247544	0.04353082158485577	0.03390385122472406	0.00793396110408029	0.049111916191112215	-0.0916164112216169	0.021173910579195265	0.18218783520790982
20.069	0.1335466673799468	0.05306620872046519	0.03749690565625041	0.008115538989803106	0.049560737007914746	-0.10049229024761974	0.019667510864160853	0.18129376750676052
20.068	0.1336397067484807	0.04186488466065441	0.042059478727745514	0.008652172382012324	0.04634520683719501	-0.10269271069163999	0.01964421722561749	0.16986873866444796
20.067	0.1362571116748308	0.037182946153887286	0.04374558260244754	0.008214812879578481	0.048190006091997084	-0.10439359935557757	0.019082750050855246	0.1691968600471636
20.066	0.11224352889411104	0.02498006669614483	0.04042497244250587	0.008700625955348151	0.04458182717030379	-0.09276913585261148	0.01152436837618076	0.1381618853058022
20.065	0.11842146588222935	0.02034078503038117	0.04198308637078352	0.009543808915869256	0.047724605865792746	-0.10631700781210451	0.01493425679970617	0.13169674425295153
20.064	0.11452436329336102	0.011813512079583255	0.04660167747343369	0.009055038668709159	0.04954526554467176	-0.11331824777611832	0.017292281697521616	0.11822160928364056
20.063	0.1199561140511145	-0.016429387351297287	0.04683820300413721	0.010224454680214379	0.05177130382111805	-0.11870196393457277	0.02311429663283171	0.09365872427071409
20.062	0.12858623471468267	-0.021238963535311406	0.0490046375137112	0.010196025365424966	0.054763951949664325	-0.11164992780384342	0.02721380797355355	0.10966195820432834
20.061	0.13105180614053502	-0.02174888951387466	0.049883122028086646	0.00938711905934575	0.05746957099652228	-0.11136772765295966	0.03168600804496968	0.11467500105765538
20.06	0.1443608966448462	-0.020608975324594603	0.051237641709463766	0.008481153445457856	0.06234594508415192	-0.1088656232108276	0.03689612145649601	0.13695103834849753
20.059	0.15792026961175853	-0.027239677312755006	0.05287438306505887	0.008492166054475447	0.0630061915005875	-0.10933981222212807	0.038694758010260344	0.14571352069699728
20.058	0.18879423467272893	-0.025591675175468787	0.05740295366717252	0.00973670865663756	0.06836804449056988	-0.12767202494374974	0.04394117426516342	0.17103824136789036
20.057	0.19041702169623154	-0.021920982871976413	0.06031516282384963	0.0108640269489646	0.06696164810680028	-0.12831383699288068	0.043119449742603067	0.17832303971098895
20.056	0.1771890394875273	-0.010801560320761183	0.06181444035877526	0.010911923259814493	0.06506583221804174	-0.1274984903497467	0.039239854148855	0.1766811846536509
20.055	0.1657196425403118	0.0008331590510586295	0.06462174813736787	0.011414795113202203	0.06483637092997707	-0.1364685524416469	0.036871444593871594	0.17095716333027067
20.054	0.16979870178959278	-0.01062156229154354	0.06467393189945092	0.012995364809993859	0.06388134758920838	-0.13966629154126142	0.03406947377995895	0.16106149225544097
20.053	0.15595276161312555	-0.0018977114852205546	0.060511717210717464	0.013281030794826343	0.062893060885024	-0.1342657560972036	0.030779113254784995	0.1564751029212692
20.052	0.12116871736965251	-0.005099407109989684	0.05516596692895348	0.012099004804225544	0.05839075758358536	-0.12785458097196933	0.02534209541461241	0.11387045860445788
20.051	0.10744114323704146	-0.01297461530159083	0.05319485313995287	0.012773769185588257	0.05458639494501316	-0.12462789609419556	0.01766229759709681	0.09039364911180936
20.05	0.08775645612352712	-0.017370778535990006	0.053469996738883196	0.012216151597783664	0.05099582306839867	-0.12091273771892652	0.01301748568368577	0.06615491127367612
20.049	0.08337215179720658	-0.03225589842064114	0.05118568534402179	0.013091278128555928	0.051621417863752406	-0.11493487890314924	0.01230824591378088	0.05207975580974633
20.048	0.07424714021769319	-0.030391682866861558	0.05324295873773366	0.011386435135596784	0.051010398913474475	-0.11668716155674552	0.011698165516336623	0.042808088580891024
20.047	0.07207292935136334	-0.041344807436465736	0.05552220375460859	0.010096207870999407	0.05181104249913382	-0.12738163683912074	0.01286569699791329	0.020775939200518678
20.046	0.07547532310877081	-0.03571642999160929	0.06230778545852633	0.010001501923470713	0.055025627889984996	-0.1450368105516482	0.01428882658015418	0.022056997837495373
20.045	0.08999468592218829	-0.031236269656348625	0.06706275887921187	0.009161749244669615	0.06113637480833933	-0.16830676086852492	0.016527590208347043	0.027812538329535563
20.044	0.0952807216227205	-0.033303484205739586	0.06700902943817244	0.008385630813577905	0.06280643028424926	-0.1722125124370928	0.018146998573228323	0.027965815515887726
20.043	0.10999117602228203	-0.038230960246514734	0.06886468985817817	0.006230171757806602	0.06758524864688908	-0.1778803338513022	0.02178094822330401	0.03655999218733896
20.042	0.09033576348415817	-0.046184729925104584	0.0668322806863424	0.004371282370263074	0.06554559755371336	-0.16678385851232047	0.018510891117387906	0.014116335657051948
20.041	0.08271706917583188	-0.03494409590214609	0.06420342164464099	0.0014078231280931774	0.06320285366443912	-0.15415318210708495	0.014620120264905445	0.022433889603774126
20.04	0.07714499362383265	-0.020655852279324094	0.0629415814880927	-0.002279669022853703	0.06394476250605496	-0.14574445172834505	0.011546266076081224	0.03535136458745747
20.039	0.0654314660600166	-0.01700061061308933	0.06264438024207664	-0.004661022290938455	0.056435821696016575	-0.13158705552873862	0.009124905014846085	0.03126297956534341
20.038	0.05612849255969721	-0.022964931576781034	0.05894235587503349	-0.005887432681795701	0.05653381682052405	-0.12193439854402577	0.0060444799811074645	0.020817902452652248
20.037	0.05308796408071004	-0.0210964600244683	0.05658634430310716	-0.0076745195601288785	0.05838825083988386	-0.1131297739429149	0.004059546812520409	0.026161805696188978
20.036	0.05592850589172471	-0.011199581614762089	0.05506790586806609	-0.009652458069627556	0.05840840070589337	-0.11105776827145508	0.0020365487173492625	0.03749500450983945
20.035	0.05867126220349217	-0.0008241072043118081	0.05661649017296355	-0.011545049230235804	0.05986849444356235	-0.11474969969690374	0.0006057321969175078	0.04803739068856672
20.034	0.04173841042754489	-0.005955246552048266	0.054854647931580125	-0.012237709301498256	0.055637856325502	-0.10673442286699153	-0.004957241437689497	0.027303535964088965
20.033	0.05693513280994811	-0.0018999900724487873	0.05584625600909021	-0.011718524654195761	0.05581964908734438	-0.10774754900776617	-0.004116814978202932	0.04723497417197198
20.032	0.05068105972669823	0.020436013627022298	0.056098085329105984	-0.011719596836262447	0.05446651079868303	-0.10268808043990507	-0.004381947741525671	0.06727399220534203
20.031	0.04093056960739272	0.028201631474239264	0.057035314536786785	-0.010512635108107737	0.053749271840247026	-0.10686503591047192	-0.005060543986363797	0.06253911644008614
20.03	0.03480620691794645	0.034796981546760364	0.05877864909129915	-0.008576982147745937	0.04807969314142646	-0.10620279646235442	-0.0073240187589966865	0.061681752087332065
20.029	0.02659140603739729	0.038441344837138125	0.06057037611876481	-0.008360672261389368	0.04457371899075113	-0.10306306240714136	-0.011512915291108428	0.058753111315520634
20.028	0.026354996660761465	0.040525915438583304	0.05830465307602495	-0.008517371806149754	0.04586527346528424	-0.10275466250140042	-0.009391011651309178	0.059778804333103785
20.027	0.011416304507136488	0.03447450607298652	0.057683098553049206	-0.008727322095896994	0.0445117743228538	-0.0953497787322064	-0.012017394299340012	0.04400858262792262
20.026	-0.0006254752455507884	0.024230797888023403	0.05747091217182643	-0.008798308734603744	0.04367873998421512	-0.0932931201787266	-0.010997183206910677	0.022663545885183822
20.025	-0.00346523505759766	0.016136738766600267	0.05712412625058416	-0.009397030287626507	0.04562262730545008	-0.09193872863829533	-0.00938319242817176	0.014082498339115013
20.024	-0.015378031685469473	0.0014919127475012672	0.05491938832829657	-0.010455318025345939	0.04116457375100868	-0.08345837669295442	-0.011693034962311444	-0.01171585157696331
20.023	-0.012131777168399971	-0.001360301318216628	0.0525493982671863	-0.012162251290072312	0.038802905100607354	-0.07903029278550644	-0.010773963646273366	-0.013332319194401698
20.022	0.010760214799941714	0.0028997183834560403	0.051714381738843684	-0.012467747612785018	0.038532882282528824	-0.08246477092943838	-0.008255524663139724	0.008974678662546864
20.021	0.01932455162393687	-0.0016535908538966027	0.05107520187007708	-0.012763338888496456	0.0380004769407396	-0.08176154534999736	-0.008009611160059826	0.012221755342363139
20.02	0.02543399778755351	0.010948813832052373	0.05100643073227751	-0.013134143856861513	0.03857126109229192	-0.08050528475091845	-0.005142463202292724	0.03232107483639535
20.019	0.03969986438409023	0.013105990185684036	0.05035308282498274	-0.013559526711727443	0.0403880543807027	-0.0860825269475951	-0.003017599475253263	0.04390493811613716
20.018	0.05139649933156232	0.014622805258950322	0.05318599267347146	-0.013523994929498961	0.04082124675996113	-0.09290698403751829	-0.0021597493775420418	0.053595565056927974
20.017	0.05647886617490627	0.014593476521469029	0.05297892135274829	-0.012198887603594777	0.04426112758173684	-0.0956574787235045	-0.0007761521888296485	0.06045602530376115
20.016	0.07228550587011373	0.01599698227573665	0.055099666373055634	-0.012722219962832071	0.0440698862002975	-0.09767775603612616	0.002906446615074998	0.07705206472024528
20.015	0.07464446955758497	0.02527689576098613	0.05211147789429127	-0.014322977795709235	0.045604489762836486	-0.08836445515115887	0.004129784925684277	0.09494990002883075
20.014	0.05132425364739479	0.014304761548005196	0.04956854005123912	-0.015352031117390474	0.03783648217912283	-0.06408247599319061	-0.0004489040295654334	0.07359953031518085
20.013	0.08567761630178339	0.009411765840248165	0.050540861496015665	-0.014723284333085118	0.03695452737252847	-0.06860823923090464	0.007697671824760555	0.09925324744658592
20.012	0.08590746039633146	0.022531968334106978	0.04989890769341443	-0.013974908502932593	0.03560614294865694	-0.07198980709487923	0.011577089617306413	0.10797976377469798
20.011	0.09844435805352969	0.03616318402500429	0.051939562013071594	-0.011768791876141549	0.03926941026828601	-0.08263841599453148	0.0185007711129197	0.13140930648921856
20.01	0.08058299140385294	0.0262422193718459	0.05321903567502417	-0.009039418291568957	0.03713080751520881	-0.08373243768854532	0.01609013433234896	0.10440319798581754
20.009	0.07604243789498	0.015028300953044749	0.05081677227577064	-0.00762993153763869	0.037358256318235306	-0.08290366786543846	0.01628268554836687	0.08871216803895354
20.008	0.07379528054353823	0.0022923174648612488	0.04669575120254965	-0.008326144294678706	0.03743427924433096	-0.07601144297568752	0.01478780435965188	0.07588004118491387
20.007	0.0782164340287741	-0.001403977621834862	0.045817235117781685	-0.010164765796486286	0.03733040169996915	-0.07247409785565484	0.015970438422676203	0.07732122957254894
20.006	0.060354975555577894	3.7161575038524575e-05	0.04253137054897671	-0.011216570807004445	0.034932975226148244	-0.06494440456850636	0.014600996955112855	0.061695507530230564
20.005	0.055043786305312814	-0.010767164968854992	0.040375547126362044	-0.011417214981586099	0.032110694672557116	-0.05047524807967729	0.014283681053643527	0.05487040007411359
20.004	0.059672882256113446	-0.011618475155717789	0.04080735051427009	-0.010028312472438294	0.03233658142949025	-0.044603675260367126	0.01685112038540648	0.06656635131135058
20.003	0.046216230303611994	-0.01280807325013722	0.04319024812578487	-0.009875570714592996	0.029812932377224932	-0.03797215410164334	0.012702618499193186	0.05856361274024824
20.002	0.055323990668842526	-0.017385031334351986	0.04277445027788929	-0.010164319001219724	0.031228199394293554	-0.042023634610832694	0.012304835847856133	0.059753655394620964
20.001	0.05500267121540059	-0.03279358369006946	0.04483403090347515	-0.009008706823318668	0.028735611960298613	-0.04521479584084265	0.00958883675079747	0.04155522772494358
20.0	0.06303879814222402	-0.050160538359040885	0.04554779802003939	-0.009570409390903478	0.025615978073142642	-0.041864239151955474	0.013215963584260138	0.03260738733350621
19.999	0.058066204444270575	-0.049004345230486024	0.043999153033709604	-0.01057909113929334	0.029697319234457176	-0.0358511461931883	0.011278793299000611	0.03632809414946969
19.998	0.054058727750709856	-0.055918701850204755	0.04302160827741641	-0.010308887779745923	0.029821591403402792	-0.036130166100415195	0.016122706661540143	0.024544171701163187
19.997	0.048096687834349616	-0.06153530022146736	0.04496411541956835	-0.010509493982731044	0.026186724224779745	-0.03253346940647539	0.017380609882240883	0.014669263868023918
19.996	0.04150520424019888	-0.053917975639965476	0.04323168398666599	-0.012082883993829618	0.025455127745097172	-0.01881037409303321	0.017643359931236446	0.025380782245133737
19.995	0.04912374205242731	-0.04686006970576795	0.04086543820502797	-0.013726817236211275	0.02660990119144202	-0.01885887831771882	0.017936786399074478	0.03715331618919926
19.994	0.048377948962652795	-0.04221790393862879	0.03658367903606852	-0.012453991501383044	0.02526848578634322	-0.022949474160979477	0.01784816430315672	0.032608744184073224
19.993	0.06361812640468756	-0.0491487314347312	0.03437720741006789	-0.010706284195324933	0.023372098538680497	-0.02362785969498482	0.020855870450756875	0.037884557028394994
19.992	0.06031389193492043	-0.028058299036549883	0.029648599173783374	-0.008211442660273072	0.02226487791092957	-0.01726717337981043	0.0198785332810143	0.05869045394299999
19.991	0.0561678149560505	-0.019275918836949124	0.023886009471626224	-0.008268446198306911	0.023882352828553444	-0.009068231646851999	0.01983978068934622	0.06732358057412213
19.99	0.06281787223210245	-0.004254071994041375	0.017244332650336425	-0.007122449931880048	0.02397396931189455	0.00023230486424274943	0.022986398866249758	0.09289195713265475
19.989	0.08237481490303455	-0.002264906097596331	0.010495117998925885	-0.004733305652023567	0.022191391037683417	0.008359123055616813	0.02704776208860249	0.11642223524564077
19.988	0.06844555219809312	0.026465751732515308	-1.4252017196625388e-05	-0.004205570044020668	0.0202391208668784	0.02311565504397972	0.026732534676857433	0.13404625778024926
19.987	0.04959232609693576	0.037004012572896094	-0.007091632719197882	-0.0049570243990935126	0.017331737932791746	0.035374917366777225	0.02582193562072188	0.12725433685110943
19.986	0.04829327045894605	0.04356576179245941	-0.014012936342581384	-0.006550468341615989	0.014193907781238302	0.04882104962115008	0.026237483539460982	0.13431058496959647
19.985	0.03755316302131728	0.05474317493540326	-0.022002913635430055	-0.007356380301187571	0.013410664192257116	0.06206214536576571	0.023430660725284547	0.13840985357812574
19.984	0.03282969391953117	0.049999403549685795	-0.023144336136801336	-0.0075300927410353324	0.002475848991295493	0.06497327439863021	0.020639823536865443	0.119603791981306
19.983	0.03653633288590008	0.05387535874387872	-0.02573366764854157	-0.007917899164878506	0.0030478372376512297	0.05146482938122787	0.020776574888770938	0.11127279143523783
19.982	0.00710124090455011	0.05067162473762821	-0.028772247226228842	-0.009583503188991038	0.002019611229093776	0.051500212910066345	0.011075830730757907	0.07293693936611856
19.981	-0.010592773153917712	0.038165807983896016	-0.03364913482167786	-0.011460624989903856	-0.0023881177319147184	0.06714718885778925	0.00640507555333425	0.04722234614427112
19.98	-0.023286414384425136	0.029712385105966632	-0.038516091203264935	-0.013787397478122188	-0.005958871017186951	0.07598517147594208	0.0018591207402867127	0.024148782498909505
19.979	-0.018951871339226933	0.022453714863561736	-0.040948337076952335	-0.017365105606153897	-0.005339743362557492	0.08006998132486842	0.005254869030570042	0.0199186388035395
19.978	-0.018794758057888217	0.018595704264114055	-0.041756299699787114	-0.01840159254656637	-0.008104998897815463	0.07857779568169576	0.006326691822862607	0.010115850743752652
19.977	-0.01414739795648412	0.020693016714435686	-0.03856708737108061	-0.017888688741130032	-0.0025021291466416073	0.06957601921894518	0.009860996803654487	0.0171637327180445
19.976	-0.010386355418564364	0.02419023057581704	-0.03716464447858847	-0.016862420324823546	-0.0028641604583530267	0.0682045099107027	0.012005437278013176	0.025117159806190337
19.975	0.022786324104235867	0.0380518053448311	-0.034922936492543855	-0.016552276049660364	0.0025935785535562417	0.05620350244418226	0.019508636047585348	0.06815999790460125
19.974	0.02807663122905435	0.04230984494049217	-0.03413952729087466	-0.01605883687981091	0.0032878725877685255	0.045051973531522904	0.02327223108977794	0.06852795811815238
19.973	0.029592344777455537	0.04028699449276729	-0.03372341446979554	-0.014772129828433123	0.0017764422525257118	0.036163031397667744	0.024193326676877014	0.05932326862218762
19.972	0.06980685725992153	0.04871265634877808	-0.03478207643950615	-0.012905876268872518	0.0065543840790152075	0.01996318298356936	0.0347604725347459	0.09734912796290551
19.971	0.06031613340576314	0.046993195670914645	-0.0365943096323349	-0.01141601895251565	0.0026296831070773408	0.019628351907777564	0.03497049649730144	0.08155703550668214
19.97	0.07009068235935612	0.04771377655560993	-0.03915473444627615	-0.011792215921283322	0.0035984966859698986	0.014430718621813554	0.03734663002149308	0.08488672385519003
19.969	0.07287231518763715	0.06308229292327017	-0.03981116750537428	-0.010442306832820769	0.008354549301599512	0.008476511165262934	0.03631601832039699	0.10253219423957471
19.968	0.07722145311668438	0.06969110644384191	-0.0394258443974298	-0.008197806896731663	0.009562809942081252	-0.0025681580861069975	0.0356997872520326	0.10628356012233908
19.967	0.0890317743486202	0.07056476340231566	-0.036816966275600826	-0.0069593625366914935	0.009322584357065011	-0.0042787505585328844	0.03427278056886429	0.12086404273717566
19.966	0.09598850371669077	0.08121878980087249	-0.03354688430138353	-0.005139969496206653	0.010047373744963117	-0.013885075688472526	0.03353166538793939	0.13468273777646367
19.965	0.09274843305436686	0.08327319000582012	-0.03352120134877268	-0.003658666591194404	0.008371287024829144	-0.01988775578063784	0.031174007553917527	0.1273252863644112
19.964	0.08355697564342002	0.08954424353780333	-0.03267147992960506	-0.0035742650494698935	0.008284225323560435	-0.02165020988136135	0.03113217566826254	0.12348948964434747
19.963	0.08448604321980913	0.07888332295725764	-0.030314735679620064	-0.0045068393121887595	0.0063192583029341165	-0.015657388468082623	0.03138614525324712	0.11920966102010944
19.962	0.06273383104188746	0.0946833694024285	-0.028626709402702843	-0.0065550091776032104	0.012152905062848163	-0.014146716532267511	0.027877913096796547	0.12024167039459055
19.961	0.04515050054359815	0.0692413490338275	-0.023935618300797046	-0.007517203299901354	0.01416220423730774	-0.013204092455921135	0.025504490293111637	0.08389713975811386
19.96	0.030612262771745335	0.057795799631495726	-0.015278841568746593	-0.007674123972384983	0.01533976529065928	-0.023805841816039397	0.0233138221052549	0.05698902033672937
19.959	0.026013030844610263	0.04788765396694661	-0.004397264246010835	-0.005960683649594678	0.018195909638126118	-0.04447965562151168	0.022058488900552398	0.037258990932565794
19.958	-0.001838259563748501	0.04007206243283257	0.0004895888215221689	-0.004710968590372566	0.01948024311381591	-0.059578901679518737	0.016316586031823732	-0.006086235465469159
19.957	0.004662610070644391	0.012421127868069703	0.009650110371941523	-0.00311364542075232	0.020334408111035707	-0.07164821121410192	0.015084660055349808	-0.027693600213162917
19.956	0.011767153988544443	0.0029579390417238116	0.014660402828100771	-0.0017854805598576107	0.021390719634488242	-0.07870167944813389	0.017117882191553413	-0.02971094451513423
19.955	0.008033962267607997	0.004085496051223991	0.019409176414058038	-0.0005060155843361613	0.020520874655119314	-0.08078325021373978	0.014251891873966471	-0.029239756410066597
19.954	0.02035518845291584	-0.0003296908195711268	0.019670784679018283	0.00031609427573275894	0.02062032936219449	-0.08278721839185188	0.01423156749228216	-0.022154512441561636
19.953	0.009451366009726847	-0.00335518563960413	0.019294435244954222	0.0012308854147313752	0.025420025864598017	-0.08652654891010947	0.011539466329442583	-0.03448502201570314
19.952	0.019107608460436687	-0.010990982398911164	0.0207175830723223	0.0013281959078410566	0.026468823655584117	-0.08366025337634486	0.011568861670985697	-0.027029024679071867
19.951	0.01599462446241784	-0.012213986145360956	0.02087467128293241	0.0013150693424064386	0.027979474678015315	-0.0783056445842325	0.013499689461438535	-0.024355790963821455
19.95	0.029740174752958204	-0.013448700146891035	0.01961303872036435	0.002432792397057959	0.042802655804756284	-0.08055159445344717	0.014855619001060028	0.0005883670747985903
19.949	0.03317027545894824	-0.007216376637515509	0.01790504200369547	0.002995820408474792	0.04139989556535273	-0.07820747053318122	0.015226145062757546	0.0100471862657745
19.948	0.0383133261448414	0.0019008661863706422	0.015517066281021563	0.006578669470920673	0.038835802770800676	-0.07715439518789324	0.01641705290130613	0.02399133566606171
19.947	0.04621791667252051	0.015271171598576494	0.015923221083903094	0.009866212234773464	0.04101058128130752	-0.08149638371099055	0.017278032232346696	0.046792719160090535
19.946	0.04768747801730555	0.0200739173621729	0.01798055909539631	0.011914810451023605	0.042617481751371145	-0.09544285356474713	0.018046566794966523	0.04483139311252238
19.945	0.06364140295625198	0.032870878862197195	0.01729797675807987	0.01278035833868607	0.04360348735985475	-0.10477717795640462	0.02096638549197749	0.06541692631866525
19.944	0.05362098964402673	0.008204052604995127	0.014448060139183205	0.01295229927873276	0.03743125602623021	-0.09543149222979874	0.018035476450371846	0.031225165463369287
19.943	0.041546619108684624	0.0021335663000279226	0.012926857632512778	0.011228270044136401	0.03425159803349498	-0.08438398015655846	0.0159428783952702	0.017702930962298247
19.942	0.03739497198475927	-0.0034355742672609324	0.007713576471760852	0.007221523610668967	0.03476924014463911	-0.06987338677600441	0.013385381240901495	0.013790351168562864
19.941	0.001612914031056789	-0.011244990288282963	0.005509078830184144	0.0028893396007765304	0.0310987908047613	-0.049778409497691634	0.004964421008903486	-0.019913276519195833
19.94	-0.0029112968535338624	-0.0030276712402734773	0.00365380432756357	-0.0010814662939955255	0.031520805390564455	-0.03923799068210343	0.0018565776250927257	-0.01108381535177827
19.939	-0.005923485740164658	0.008930344913942179	0.0038512051717143336	-0.003865940760276132	0.03314552270609905	-0.03133032303743022	-0.0021701048223414787	0.0048073232538845545
19.938	-0.019481816781280692	0.018384981423829494	0.003402532046732354	-0.00609622663260545	0.028014606762822858	-0.02284663900519046	-0.009623157529881077	0.0013774378143081023
19.937	-0.021563496908503232	0.007614423914866997	0.0035071381921847333	-0.008239362696849106	0.02489222937908142	-0.019860659043320794	-0.012318704490282606	-0.013649727162539982
19.936	-0.031027786933527146	0.005352179815626634	0.0009212012574169037	-0.009705252944444354	0.02404268079134564	-0.02180992700829698	-0.016342694814809988	-0.032226905021879304
19.935	-0.04072885643073221	-0.013369743466875583	-0.0005929550679102391	-0.012838377368829867	0.02266977921750435	-0.00737968302978409	-0.019576592035343232	-0.05223983614662764
19.934	-0.01566164300653128	-0.02529347932465864	0.0019744741142719846	-0.013413434426118975	0.025023126499249315	-0.013525925070551281	-0.013406717161810633	-0.040896881214338876
19.933	-0.01326913666463625	-0.027830902027458748	0.0052738750079450725	-0.011364907704785487	0.022952358228960357	-0.013796615541259882	-0.013309222532659426	-0.03803532870123494
19.932	0.02343569849652738	-0.03156292743635092	0.007028897353484886	-0.009079697945168164	0.027765078664154785	-0.0254243361430877	-0.0076385918495311955	-0.00783728701043973
19.931	0.024945640971103522	-0.01615996965420763	0.006181190112489965	-0.00692186909377579	0.026916283175453692	-0.028744758884426957	-0.0032634732592722315	0.006216516626636803
19.93	0.0370343000946054	-0.0003348690755489159	0.0080989309267121	-0.006643510187259061	0.029252853877446583	-0.038679292431141654	0.002803807201082087	0.02872841320481445
19.929	0.04651800105506165	0.004890760067152833	0.008247802912254798	-0.008145580727706658	0.02689001549671044	-0.03785979387760907	0.0042865334806272415	0.040541204925863994
19.928	0.04545940264965154	0.0031710113936354034	0.003594652589508307	-0.011145733367346367	0.024710958407119676	-0.028590648320382606	0.0029982397241852254	0.03719964335218595
19.927	0.0653187624548881	-0.003143312294546341	0.000686566749696027	-0.01597758104753133	0.02883714378089053	-0.023718435809580107	0.008160937956011693	0.05200314383381688
19.926	0.04952129879676548	-0.001115534809837726	-0.0032868669552463814	-0.01831897564325402	0.025782019936948508	-0.010801721068182779	0.005878999602071389	0.04178022025719308
19.925	0.06505205615402776	-0.004885301802525888	-0.006309358893862971	-0.019219992606390512	0.026004896412938905	-0.006407834724470263	0.00727257493828759	0.05423446453971703
19.924	0.05558110097301672	-0.015916441769927125	-0.009976227695529083	-0.02074720227373028	0.02255559167317056	0.0031367024226591766	0.007044412151206103	0.034633523329659965
19.923	0.04316300369327575	-0.027057577987019243	-0.010336260791445895	-0.022226905379837625	0.018535670166225593	0.01400248116362146	0.0034106315277186994	0.01608041086482004
19.922	0.05153156818479143	-0.03242071510098565	-0.011216443582910962	-0.024176918042332574	0.019403370103936446	0.024723915256576134	0.007007424201946222	0.027844776819074823
19.921	0.06091404627683161	-0.027200436692438323	-0.015017980939401099	-0.024110056552659742	0.02002477537322367	0.026951762897738263	0.010641727510837917	0.04156211036329438
19.92	0.05839837721671337	-0.021500814866000084	-0.015067145646531444	-0.02429491208474044	0.018484421812815732	0.03332776726838205	0.0069773213145643	0.049347693700639184
19.919	0.0556169404242155	-0.01959600162182351	-0.012515445827844474	-0.025556263262689782	0.007146924278368161	0.03083547418371335	0.007330846308528649	0.035931628173939245
19.918	0.07621342849426238	-0.0201020575974189	-0.010249430835334472	-0.026038628365248506	0.013220300451004974	0.022612123325554734	0.011085562131738058	0.05565573547282021
19.917	0.09048642727166278	-0.025053327577026607	-0.00936408578133996	-0.02728638593599264	0.01665026332119801	0.0182406803486721	0.013104340594496833	0.06367357164717369
19.916	0.08142458616858494	-0.019734490780479064	-0.005713163338116445	-0.027539906479285392	0.018137630044622988	0.015120197265285462	0.017089604746270304	0.061694852880612494
19.915	0.08904718940093481	-0.00905947625237502	-0.006167784581535329	-0.027023719880345354	0.020548261937751278	0.015903607579471846	0.017937315005460697	0.08324807820390223
19.914	0.06256775447447716	-0.0091201960078795	-0.006465330384000545	-0.028275376054412327	0.01648756316550859	0.029359118168462928	0.010148100185817022	0.0645535333621563
19.913	0.06531043262696468	0.002531908495288171	-0.0025699559911194214	-0.029586430409787035	0.01655882228525396	0.025119426851568427	0.007861397511717882	0.07736420385816878
19.912	0.06320009690488693	0.010273759329325394	-0.0003177235665177136	-0.030484253574065256	0.018710949884045647	0.02714359352454121	0.00524475853666484	0.0885264225022162
19.911	0.07405830627155385	0.005619445433837633	0.005945836502868396	-0.029836255362100772	0.016038433687200815	0.017890613731958105	0.008237546907870374	0.08971638026531803
19.91	0.08585245548645926	0.0010924455291823065	0.004957814971748853	-0.027676238168270473	0.01566300478071181	0.00694333529885327	0.012811683811021268	0.08683281789868502
19.909	0.0858091317701053	-0.004728500200751995	0.004082649500601221	-0.02540692634391828	0.015674564427643034	0.006725709849838779	0.013631761593144276	0.08215662900351806
19.908	0.07489061459415058	-0.01163908239359035	0.0018036760553030717	-0.02331348747377593	0.011397662721706503	0.005218136990716715	0.014157932363013437	0.058357520494510595
19.907	0.09834755191895805	-0.023306975373934335	0.0010164520997886228	-0.02263579290469586	0.014019013796941593	-0.001112615564239583	0.02132892043401835	0.06632763397281849
19.906	0.107886733561668	-0.0038170635592731372	-0.002086994666534281	-0.02158704442105197	0.01703272886404683	-0.007525983512084444	0.025006248820752752	0.089902376266771
19.905	0.12383078992744334	0.009632670299599688	-0.0032895906221153126	-0.02020198859881006	0.019580541255889372	-0.01279300261192251	0.02868107701172118	0.11675941965008452
19.904	0.1366639645452974	0.025216873996483535	-0.0031459194289960024	-0.016846665910480674	0.024528641250699756	-0.0326927378477464	0.031479788579624746	0.1337241566052576
19.903	0.12275296357489562	0.032589072112867434	-0.005088122881385715	-0.015054694268488156	0.024580822633958554	-0.0443718412728078	0.02468303132413574	0.11540819989903994
19.902	0.13869582496409372	0.022982843227051575	-0.003039812715647905	-0.014476862526552559	0.027402034022957267	-0.05646600352033637	0.027207524157406127	0.11509802345156572
19.901	0.09903719022682456	0.035941223576789305	-0.003656139403553915	-0.014764554380234607	0.025999459237212363	-0.050272635913192865	0.02303273249498794	0.09228454334384484
19.9	0.09791057660976854	0.01463611689280686	-0.0024825811399251663	-0.01489247040964159	0.02301741356027165	-0.05242474981400136	0.019794137423539304	0.06576430569927894
19.899	0.10559722943674998	0.017255690684151226	-0.005357087788679493	-0.013829559780440093	0.0220791657519932	-0.04868293274467472	0.019883933154587474	0.0770625055591001
19.898	0.11581220643884738	0.014351821261371356	-0.00662193675479017	-0.011421940788093998	0.0222095708110297	-0.041988397462771054	0.026353895227652302	0.09234132350559321
19.897	0.10957586031163125	0.031017543775901046	-0.008772564208037181	-0.010630635783180686	0.0215376080399885	-0.02636495233137115	0.031160972475985815	0.11636285980493177
19.896	0.0878239541644712	0.0381093611093819	-0.009317086133407315	-0.010367400825724182	0.014520506413213674	-0.0024913505830621574	0.02749589912086492	0.11827798414487312
19.895	0.09189959588533902	0.044252475978074024	-0.007963574598479184	-0.010790181084559869	0.016626849660904774	0.0025781674830795964	0.026975288374700312	0.13660333332435837
19.894	0.06836240825487483	0.04551694411228979	-0.006450415739849724	-0.012450366201595564	0.015739594506842813	0.009106894822277667	0.019861017711806817	0.11982505975483981
19.893	0.0660379851749644	0.05333532847100653	-0.004177928629820471	-0.014202297084720428	0.011962340342947186	0.009005617483293982	0.014681574635392103	0.1219610457576712
19.892	0.06771826585722351	0.05613002785554233	-0.002563905739998873	-0.015500012220920567	0.01289401205089824	0.009349948487186843	0.013864363794875878	0.1280283362899315
19.891	0.05096536180103772	0.05939428435671967	-0.0038046419266590803	-0.016564004116760955	0.007422668682625755	0.012674818797257181	0.008921479354144779	0.1100884875942203
19.89	0.015593913468604725	0.05368941428573759	-0.0024495035169689316	-0.018650194083735805	0.002492750537401278	0.022097685766266473	0.000818818246828279	0.07277406645730533
19.889	0.007531920721131513	0.055783892315417916	0.0002733693808112392	-0.020920481433155835	0.0036596249258842306	0.024314788221007078	0.0013384304888770515	0.07064311413109614
19.888	0.0059640152128670465	0.06134267294380713	0.00303593065915031	-0.021542707505950887	0.004387350794575973	0.02116116917127009	0.0012916191753165052	0.07434843127571966
19.887	-0.015062067033089654	0.05702184294206347	0.003079470902456194	-0.020206086781495713	6.971693896939968e-05	0.024516173808599717	-0.00420318964782318	0.049419050777503415
19.886	-0.015299624588457128	0.05930864541711145	0.004913208584780726	-0.018737049131219763	0.0014672772756236796	0.020763311584519606	-0.008491972762244338	0.05241576914235857
19.885	-0.007253741262736035	0.051713754006797785	0.0015838329662765105	-0.018223379130431816	0.0010613172934705872	0.02310614834060054	-0.012970775091334374	0.05198793221397757
19.884	-0.028438717714407424	0.04715677880344238	-0.0005861683033954179	-0.016724965519652635	-0.0011980457822842183	0.028653764831490847	-0.019762103128900144	0.02886264631519353
19.883	-0.024490172408213162	0.03678151600233637	0.003043780114875716	-0.01229967427304679	-0.00043348259102149456	0.013102034619396186	-0.01957818669417044	0.015704001464326822
19.882	-0.038726430502395104	0.02555849076157468	0.0033424009769564833	-0.008325222566806012	-0.0011952460490567418	0.005144290158956011	-0.023109034691100483	-0.014201717220770682
19.881	-0.021061475928100926	0.016894544374665088	0.002591712386344369	-0.00485900481735424	-0.000528073412849217	-0.005135374549352534	-0.023137148224684267	-0.01209767194664746
19.88	-0.037850061499020704	0.023350937730711507	-0.0016885078415755927	-0.003987878027666092	-0.0002907761753734306	-0.0022890790594169985	-0.028654412320421763	-0.02275536487234131
19.879	-0.0455946244156884	0.0384597018212256	-0.001307476145719022	-0.004444942685131181	-0.0005171220879987004	0.005433270923211886	-0.03367291823936114	-0.007971192590099818
19.878	-0.03769677065981636	0.037012262662153184	-0.0008995325184155689	-0.005028358895428298	0.000494431421701691	0.0024428281698050114	-0.03395359227529138	-0.0036751398200003393
19.877	-0.02096395716967514	0.018180149110094135	-0.0015310221866249307	-0.00639973501709612	0.001480669454712924	0.0017164529716886534	-0.030334243064777056	-0.007517442836900479
19.876	-0.03215047063469889	0.023194441400660182	-0.0032587651409068386	-0.007718153788989213	-0.0010618423947992284	0.011197079704415636	-0.03526852411397119	-0.009797710854318353
19.875	-0.04055874770220047	0.012631403213823056	-0.0024031242421758137	-0.010173214523519825	-0.0038875942223182136	0.02381286331254895	-0.03533949433886274	-0.020578414163842318
19.874	-0.06773890213762535	0.01084714777783713	-0.00352442535516051	-0.012689088838151008	-0.007652278385477551	0.034156120209146934	-0.03906801666362103	-0.04660142672943035
19.873	-0.06959207290689573	-0.00030001777075217007	-0.0027377534728927344	-0.015586429373609434	-0.011969383723381632	0.04334404375758272	-0.039710948266519885	-0.05684161348994898
19.872	-0.068010365226991	0.0008524728355672195	-0.00589832465072071	-0.019229267937349803	-0.012614762071829766	0.05863858254911669	-0.036956374670890746	-0.04626166450220737
19.871	-0.07071417547088554	0.011540125580254745	-0.00979579446621237	-0.02150974197932598	-0.014297183135717262	0.06728359164627395	-0.04005585665982725	-0.037493177825612456
19.87	-0.04369220940277252	0.006002154086786504	-0.009785543412135667	-0.023649031148589295	-0.013732570629654717	0.06539374466453207	-0.03750957108343922	-0.01946345584183362
19.869	-0.038290848693741886	0.012924306992648127	-0.010452978316659589	-0.025580849122438742	-0.012218652715929146	0.06714001735222208	-0.034305572386605476	-0.006479004503899155
19.868	-0.041142243098483355	0.011835463544585423	-0.009985338630754015	-0.027738981980314215	-0.016171571810000174	0.06917065745894746	-0.0369093406191352	-0.014032014516018876
19.867	-0.03021124267715969	0.017133073627591422	-0.010858867842304498	-0.028761509330431423	-0.017695885611627382	0.0651674112334053	-0.040873065626620964	-0.0052270206005262665
19.866	-0.030437391454285923	0.0047971095182095524	-0.0106797037768942	-0.029237259090963086	-0.01872760412684915	0.06334046801678461	-0.04816737069669408	-0.020944380913998195
19.865	-0.017917468337879328	0.0059050906777349255	-0.007279530072314522	-0.028237861643294337	-0.013668483268368448	0.04317165270013934	-0.04676777188902914	-0.01802659994398237
19.864	-0.005474486837894865	0.006942232854317609	-0.006801989262112507	-0.027675426463739328	-0.01286251328510879	0.02746215014297526	-0.041591271378724315	-0.01841003285156262
19.863	0.009516472677921328	0.021911011344851516	-0.007069996753165775	-0.02703032126630589	-0.010622711800057694	0.01848467263754472	-0.034540300284273684	0.005189126840788205
19.862	0.019139736591755607	0.022321951477315416	-0.008156639705648061	-0.023914406668033905	-0.005033246750858922	0.009507807865140272	-0.027505689700406677	0.013865202809670407
19.861	0.027217243212330544	0.02405611296542176	-0.009566855434680832	-0.019544299795452247	-0.0037325896904949474	-0.000857706001913705	-0.023523250500983472	0.017571905255210574
19.86	0.03185388752044904	0.030051736200070955	-0.009049851029102385	-0.015956712333595746	-0.0006856581096936765	-0.005773551790315246	-0.022073875969632617	0.030439850457812945
19.859	0.04919259320579705	0.0295895685498051	-0.006711880216601962	-0.01253030918479503	0.0017809919934892449	-0.015721066490018032	-0.016821351331263834	0.045599897857676375
19.858	0.06289693843771627	0.018480619491244354	-0.009479984960905519	-0.009080636141324483	-0.0025936983384253764	-0.020690661278972122	-0.015654484566895555	0.03953257720933312
19.857	0.05727116062833115	0.012306281960531074	-0.011639877184649983	-0.006944036838079981	-0.008108182854006607	-0.013533826994877707	-0.017080174629746203	0.02935151871724795
19.856	0.05293012864205071	0.016203236253292452	-0.009986749293117825	-0.006522861858450746	-0.008507765046902094	-0.01291934600178024	-0.01653178136300859	0.031196642695092258
19.855	0.05001603230842022	0.023463850245162732	-0.01206689261939431	-0.007448785062451613	-0.00906280797131842	-0.010943803365631943	-0.017556739837433888	0.03395759353478667
19.854	0.0458329626112679	0.02084237606469852	-0.014903637537433845	-0.009787137485245623	-0.013431736439322606	-0.0017122047188244949	-0.01695506395385582	0.026840622495139854
19.853	0.060075179727659744	0.024490750276695117	-0.018585492025379402	-0.014670029279767682	-0.014154186127128376	0.007717074605171348	-0.014153892488841358	0.04487329717725075
19.852	0.05116050393040261	0.024512203941744914	-0.02475270305321864	-0.018836927711467055	-0.011582704519516263	0.027995346655092845	-0.015403687383183318	0.048495719243038415
19.851	0.0641753205874469	0.03149107277547625	-0.028198487086563695	-0.02049306369544812	-0.010176185522266401	0.03813810269548412	-0.012441431761291533	0.07493675975412906
19.85	0.06061096683947209	0.0356238179163455	-0.030926578892433554	-0.021502452123738358	-0.010199792707781263	0.038778592291924596	-0.008585577695014557	0.07238455332378901
19.849	0.07837339008053235	0.04044048053691274	-0.028095951665584984	-0.02082598733233265	-0.006452017915994368	0.026596809658109954	-0.003949640460240822	0.09003672336164303
19.848	0.08666031356319515	0.04928034662368397	-0.025670988306429443	-0.01930280076990165	-0.00451429909159895	0.02007837053202266	-0.0015310430107353667	0.10653094255097173
19.847	0.08975096440623531	0.05274221184741368	-0.024707553926772263	-0.016869209079644065	-0.002338666301457515	0.01069183129939244	0.0020313226443144927	0.10926957824516759
19.846	0.06181408924309917	0.07090084824706988	-0.02402968797990379	-0.014513486673191522	-0.0014590203453899164	0.017721555923510657	-0.003442033319022819	0.11043429841519448
19.845	0.06014542695682312	0.061074797568225314	-0.024749664538602723	-0.012408755835136454	-0.0013496730537188029	0.011717658981641677	-0.001043646209053506	0.09442979007923213
19.844	0.0706483352505165	0.05492065714085825	-0.0239010397617605	-0.010554763258333821	0.0015607337563787738	0.0027458370925668163	0.00047053375903871597	0.09541976022022602
19.843	0.09871588895582661	0.044342652689631556	-0.022606241838740715	-0.008721188206870956	0.004323481255551265	0.001977832524630685	0.0038257967768267065	0.11803242538002845
19.842	0.10955008688695766	0.07696404197962892	-0.025050316282450247	-0.007269725328089116	0.0072128152065653595	0.0020600834817274816	0.007112512055750919	0.16346698594434006
19.841	0.119382026530924	0.07665926644221432	-0.018850499582823588	-0.006021765280578073	0.008200388758742072	-0.0038456060132681102	0.01019245855971107	0.17552381085521063
19.84	0.11355602359047356	0.07595339354003183	-0.015329295538331955	-0.0038251315495623217	0.007926671105446204	-0.003577714424511491	0.009138890004836142	0.17470394672354583
19.839	0.09933589746240745	0.08219487254395919	-0.013625783331523422	-0.001365168140041284	0.0038478473465941576	-0.006949253935211175	0.007168198343883603	0.1634384119461849
19.838	0.10253665890825303	0.0839466104379527	-0.01025784807490382	0.002331398340338353	0.0017448968660502828	-0.016147692300744865	0.006645512426836753	0.1641540241769457
19.837	0.11421108770368704	0.0912899054237668	-0.007073122816437127	0.00596008428993855	0.003866412961451182	-0.030907179922281536	0.010089431725694098	0.17734718764012491
19.836	0.08403168039790643	0.08333819618623384	-0.006510497393275472	0.008479293184238124	0.004198066433999337	-0.03774464703190006	0.008340592617519071	0.1357920917772022
19.835	0.0803761414823514	0.0673927570147006	-0.005401183441682278	0.012092237450778143	0.0019844965090065614	-0.049469758057359314	0.009047205126798907	0.1069746909577951
19.834	0.06616327673308575	0.06111729143857847	-0.004452811139159074	0.014625882240628663	-0.0015312630384025638	-0.051192065152480204	0.006586676040552852	0.08473031108225104
19.833	0.07149526305838272	0.04767063861040732	-0.0017778181782377445	0.017661996263182544	-0.00066023382836633	-0.05222969430236901	0.0051240166617967375	0.0821601516229995
19.832	0.07375995256037005	0.04259667795158606	-0.0008135752599569557	0.019986947201798166	-0.0033342285384998505	-0.05171788981401804	0.00288336502990294	0.08047788410127943
19.831	0.09621543073892802	0.03570113739651415	2.4351492808882824e-05	0.02086347531387034	-0.0015968860413266839	-0.05673722462665509	0.007500248749980898	0.09447028427413962
19.83	0.08261756774448958	0.040171217500192036	0.0029019898554913937	0.0196372701245755	-0.003533140646358568	-0.058965787509584366	0.005991802781235123	0.08282911706880558
19.829	0.10397446290818291	0.037667425748010075	0.0037081796403954925	0.018336971255870083	-0.0007241055179179057	-0.060228739108111995	0.008450685945289749	0.10273419492642866
19.828	0.10891632853366673	0.04229807870661251	0.008626589496015136	0.01831633268303623	0.0008317574244243175	-0.07079276629183973	0.007908958329175597	0.10819632055191519
19.827	0.10250118438356193	0.04853499992605492	0.011093938462330755	0.018277512044935662	0.004419167982740113	-0.06784528020036795	0.012904836568515599	0.11698152259925543
19.826	0.11416132573137716	0.055672026775764216	0.011329655681731943	0.017350665728644188	0.008563962421458626	-0.07090809490973449	0.01886094599672017	0.13616954142924165
19.825	0.12197653146044729	0.0705967537807366	0.011500728585586373	0.016873346117574073	0.012801365463681158	-0.0670230366702409	0.023594526542687788	0.1667256887377846
19.824	0.1098059618007543	0.06390462345275072	0.012725637591922023	0.016862508044439117	0.008832669189185793	-0.05663646778161091	0.024960381447739266	0.15549493229744105
19.823	0.12241800280228077	0.06918156514402707	0.019167779936249296	0.018282673896893087	0.014194944343763005	-0.06647942242351679	0.02668168719113151	0.17676554369969644
19.822	0.11435644826782454	0.062217976043423384	0.021778180652037626	0.020872674879329978	0.01375162827576304	-0.0677761087505786	0.027992321203665682	0.16520079936779997
19.821	0.1261663256013037	0.06338628160628357	0.0247685396986288	0.023087119780910825	0.012235932012081285	-0.07437359859997628	0.03462524888850904	0.1752706000992319
19.82	0.12287406550188607	0.07295459438284801	0.02685769449729225	0.02416759667812407	0.015603280561136579	-0.08243241362475917	0.035230456781059516	0.1800248179965278
19.819	0.10920327562138343	0.06864473358955259	0.028983755349120344	0.0249134652365397	0.01434297157323794	-0.07973035466027323	0.032976241925180894	0.16635784670956077
19.818	0.1034075452450427	0.06237831043588837	0.025784989965260685	0.02499586488157668	0.011719869290361729	-0.06850633918295301	0.030953592731970403	0.15978024063517715
19.817	0.09547108358166767	0.05029353635286338	0.020502570473544424	0.02447743626203458	0.008464451621176927	-0.05995295949425028	0.027798067569206886	0.1392561187970367
19.816	0.08882259207793464	0.042789990800652156	0.021148587315736656	0.02291541021377075	0.002820670515785828	-0.04860303508129871	0.023084663581256493	0.12989421584258132
19.815	0.10598694574142975	0.045429766768398494	0.022823392443807933	0.021548641686650605	0.0029612718010598726	-0.05008936299887701	0.024885200483752534	0.14866065544246965
19.814	0.09091339779805807	0.06670901943967689	0.021829481134854944	0.020772602202096202	0.004613840319552587	-0.045295734853836755	0.022248419836320643	0.15954260604040194
19.813	0.09558620525339823	0.06391070773259155	0.023446692306787753	0.02142480847691086	0.004181045611362677	-0.04443546512567664	0.02219963232124833	0.16411399425537443
19.812	0.07845160463778722	0.07473835877524238	0.025532213435506712	0.0216901410428747	0.00041122227116563437	-0.0457850397029409	0.021387793843497427	0.15503850045963574
19.811	0.06671147860482574	0.054704529679676206	0.027114325169960374	0.02250538733586005	-0.0024803241698618805	-0.047508864674288276	0.017074864785497468	0.12104653194617221
19.81	0.050220050114544	0.04123067851849882	0.02812419731611726	0.02420249065908031	-0.007546899690326292	-0.05273573295404432	0.013363235874874313	0.08349478396386978
19.809	0.06162389044381644	0.02749769425884807	0.028050997378865183	0.024722042668207322	-0.005831142086557328	-0.05795757481811581	0.01357898210504871	0.07810590784506388
19.808	0.07107242680240855	0.02077057571372709	0.029730053194395367	0.0254206713794094	-0.004484553070719599	-0.0599778071070034	0.012260747477812473	0.08253136691221741
19.807	0.0848731878178457	0.026411234315938614	0.028041026014859582	0.02426228292103616	-0.001345315091956678	-0.057184772150331575	0.010659202206352525	0.1050576438273918
19.806	0.0643513660056767	0.013140909323452021	0.02372973558210667	0.022945155899162017	-0.0031301812828745668	-0.03870429677115528	0.0025527820960853376	0.08233268875636757
19.805	0.09962305725366694	0.01180329778287792	0.02242379984424403	0.022153964674636484	-0.0017496967584751388	-0.03532612531069912	0.00508801579468976	0.11892829748625111
19.804	0.1242010107241267	0.015582961024850128	0.022634697048346197	0.021054861774799427	0.0005701547002141538	-0.031124832870229824	0.009866832276829385	0.1529188524021068
19.803	0.13792253087839246	0.02310048464901726	0.02122767334674691	0.02167064849637157	0.0022115444532149198	-0.025715233407883176	0.013688293023231601	0.18041764841585994
19.802	0.12661333675807107	0.017829689846275976	0.018161567656882482	0.0206476316459705	-0.0011314699135676065	-0.021946002244854768	0.010836529918264226	0.16017475374877765
19.801	0.11315352879274343	0.010350333248578814	0.015177814045069127	0.020670517069156347	-0.002854162159324325	-0.01596546853016889	0.007951423767646126	0.1405325624660545
19.8	0.08765959587334748	0.015395565668485212	0.014870514028444859	0.020565108102474916	-0.004067680395060336	-0.011915200296066075	0.0018489011634148511	0.12250790298162606
19.799	0.09205128463704071	-0.0006493015317667883	0.017223516524510707	0.021242689053733166	-0.003468693358984254	-0.004809922988012971	0.0033260690810488214	0.12158957233652057
19.798	0.07486038577413368	-0.008134999351036676	0.021670635897819146	0.022419436577308716	-0.009139907605805853	-0.0013241911240982063	0.0029716722436017307	0.1003513601683208
19.797	0.06064644119336737	-0.006190422185780697	0.019353780451541347	0.022221646479879453	-0.010953679438949315	0.013842649493957637	0.004637828394119303	0.0989204159940158
19.796	0.064590804306075	-0.00616873791924899	0.022658982287435236	0.02358037711137495	-0.011980783932801664	0.0017085564462089309	0.0004681915328035302	0.09438919829904346
19.795	0.06823838348332423	-0.013855032277869661	0.02577688195252925	0.025369875228484773	-0.010787665262607327	-0.004590383980561441	-0.0010344804556616793	0.09015205914329982
19.794	0.0714625176271868	-0.030215080464476962	0.0250950772138383	0.02631454845317016	-0.013594507246174281	-0.003042020316072147	0.0017166898307383605	0.07602053526747188
19.793	0.07709331836512412	-0.03346612069406962	0.02825278769428685	0.02765715963475568	-0.009856264386150393	-0.016288312173382558	0.0028270944216428617	0.07339256844056408
19.792	0.06839241321285439	-0.042933051157572955	0.027977720609106527	0.029190538053041948	-0.0108543619297361	-0.017343466627282922	0.0027022828300866664	0.054429792160410884
19.791	0.07020495239351554	-0.0418741185367022	0.030575702610700972	0.030103744626948092	-0.012462523959497318	-0.01611933714583902	0.004231293962618565	0.06042841998912607
19.79	0.08090295787054558	-0.03837175425404826	0.033122664416222136	0.028846753968625904	-0.010230040305345689	-0.01818886804582487	0.0038565567321455774	0.0760817136501748
19.789	0.08030196211852747	-0.04946609998405993	0.038481507276889815	0.02719555999794654	-0.01474444772541883	-0.009287900083918998	0.005067069793120105	0.07248058159996607
19.788	0.11022574108520455	-0.054385490501823064	0.03925766000339692	0.026070188287348195	-0.013588915600742268	-0.014502900217011394	0.011532696439249257	0.09307628305637294
19.787	0.117366072569979	-0.05733752723154062	0.04038318590408441	0.02603626989824459	-0.013877785359311723	-0.013245725396388686	0.01907910138652369	0.09932449038506697
19.786	0.13445266501154585	-0.06389028072182334	0.044668084061653346	0.02622782060607065	-0.009822980788912083	-0.020758684038298725	0.028942593133047367	0.11087662413023569
19.785	0.11365743505758452	-0.06128715982887112	0.042485089080412486	0.025359330064948615	-0.008925625103428203	-0.007246229835172535	0.03055345777410068	0.10404283943547377
19.784	0.11981015031082176	-0.06824623304489474	0.04041129841534907	0.025838529701569968	-0.008045254123479673	-0.004585141131149051	0.033085180279790016	0.10518335012821733
19.783	0.13815094441667597	-0.09627969006276516	0.04261549875680881	0.025801109667415112	-0.007494855391027677	-0.004532368831612565	0.03988802519395662	0.0982606385554945
19.782	0.10465936814985088	-0.0929822618324998	0.03918302303812027	0.025555919345605638	-0.010171239913934649	0.005119123605711984	0.03550867737532659	0.07136393239285432
19.781	0.1131485058150794	-0.11244566718161408	0.038996751770908666	0.026259825761261624	-0.00843986896850879	0.011685903722144175	0.03558639489378912	0.069205450919271
19.78	0.10096513907323601	-0.1104837982229574	0.03661111205447565	0.02633688865487116	-0.007082185622104831	0.016748274182818434	0.03379167214385781	0.06309543012033902
19.779	0.10253360421356383	-0.10916290124029526	0.03295545464272642	0.025371209179358978	-0.004995630613711555	0.028878719440618816	0.03471334092474976	0.07558045562226123
19.778	0.08644188948935572	-0.11003619114705643	0.028250942134555146	0.024216726022517676	-0.0063477524984687506	0.04017596056149042	0.03329999925282934	0.06270157456239378
19.777	0.07098662089315333	-0.11069703802388187	0.019283774447673707	0.02371321995036002	-0.008247286944553345	0.052540556319062404	0.030714561164172594	0.04757984664181425
19.776	0.06331295785156499	-0.11649161884269699	0.020040195306682662	0.02516457799069105	-0.009549230877738957	0.0555151810370802	0.032029030184167695	0.037992062465582954
19.775	0.06354088020025106	-0.1111826151185431	0.02333002018751973	0.026454538328888333	-0.007560625714294389	0.04673469538453112	0.03433776870451144	0.04131689326835275
19.774	0.04561460557814723	-0.11608268085702367	0.024707651989878343	0.027118885958391736	-0.007988984151139356	0.04824585903543266	0.033204140932952875	0.021615337553686942
19.773	0.05857735453973323	-0.10991603358666069	0.02738996676178118	0.027367444398433527	-0.006195265119710136	0.04765693272939675	0.03824883203847573	0.04488039972297386
19.772	0.06193596927943723	-0.112051479013207	0.033030222802789666	0.025974191690807835	-0.004646811716743748	0.037554940391916425	0.03971633032484956	0.04179703343500041
19.771	0.06192248465641903	-0.09641770246625647	0.036361061256261706	0.024727324308796206	-0.004279893014031089	0.038051075588616534	0.04338153278301071	0.060364350329805916
19.77	0.0701093489901945	-0.1088509950623191	0.0400450372441572	0.02329380813751314	-0.0031106104239180254	0.036601883314697936	0.04716156093801516	0.05808847220032565
19.769	0.09563581282911837	-0.10790704478201452	0.04419185142393367	0.022547991838311354	0.00087754059142231	0.038769338068990855	0.053654717201524704	0.09411548996976205
19.768	0.08819339160553774	-0.08697876096842005	0.04222424879193998	0.020921192574102854	0.0030770769775250173	0.03984815521220142	0.05258027709344848	0.10728530419288695
19.767	0.07969883601664751	-0.07821246636252965	0.03755030310911067	0.01990941260289336	0.006580536295380135	0.035255258020169045	0.05177933352466191	0.10078187968167107
19.766	0.09096764415558845	-0.09694911893833424	0.035815613594434303	0.020194149110518644	0.007914464567115864	0.028962325919545506	0.05261398228385428	0.08690507840886852
19.765	0.09375962690361117	-0.09715220490826937	0.03096383543184622	0.01953042452058007	0.008910624772402898	0.029240210387136756	0.053349802679357516	0.08525251710730775
19.764	0.06974046664557321	-0.09645673089362816	0.02607583739789643	0.01819923403773327	0.003816477626267023	0.045496415058560835	0.049860163913042044	0.0668716998724026
19.763	0.05912958257923773	-0.09768301257718548	0.02594135575216594	0.015994183507198834	0.004641260471661468	0.04765998329842347	0.04613277886511913	0.05568335303150196
19.762	0.06019330708642645	-0.09702341791383162	0.02265332945845966	0.014355749556282937	0.0033629974787849903	0.05633788283926133	0.044501472403202236	0.05987984850538375
19.761	0.043488607658155765	-0.0902657343221156	0.021121147623609282	0.01119238222265384	0.001620567027289077	0.06580028736109789	0.03982083046071949	0.05295725757069025
19.76	0.023760766275413125	-0.09229438205751173	0.02078054121303463	0.011125534708749996	0.00135697452076311	0.06524391132898	0.032922322368298396	0.029973345989429134
19.759	0.009075242580707688	-0.10074635438131718	0.01928030789222035	0.012486584483832885	-0.0013152884457161562	0.06659908808543324	0.029575668208934758	0.0053795802151608285
19.758	0.007235158969089994	-0.09756401799936931	0.017252635169688446	0.014317287846322913	0.00043173330087675765	0.05827900390948759	0.029547699894810542	-4.8198803903609644e-05
19.757	-0.0194340082214568	-0.08526127565147146	0.016222068923280375	0.016492120008947175	-3.773236877346875e-05	0.06581178487570671	0.023505670454437855	-0.006207042433767462
19.756	-0.018884973269657657	-0.09875733000719489	0.014959885798415229	0.016681341557454488	-0.0011340505582690952	0.0664043060313535	0.02053056085956495	-0.020730820447898424
19.755	-0.010608164068120374	-0.09957100664147589	0.01373453627879151	0.016259785813465655	-0.0027740299513938638	0.06618824988748706	0.01994649658021075	-0.016770628681245903
19.754	0.013358060652823411	-0.07723755964577261	0.018518691166317325	0.01681703636129761	0.0005418634029021874	0.04833120214800157	0.023063674875569262	0.020329294085569494
19.753	0.00539666224396651	-0.07014749918639751	0.022336741284562756	0.016264295380567617	-0.0013048918191094216	0.038054626067763664	0.02160669133955384	0.010599933971353614
19.752	0.0007932948105633386	-0.05161131789249929	0.024814076896008785	0.016876563743607242	-4.481989778160056e-05	0.031118696315283856	0.017473567221483854	0.021946493975182335
19.751	0.00742429079483653	-0.048204610577725404	0.028616632824335575	0.017920274390845314	-0.0005439503036832605	0.020782688670207605	0.018552322414842948	0.02599532579881636
19.75	0.0026493601223016583	-0.04962518668337168	0.0316611945755918	0.017125847572205366	-0.0031313729337210106	0.01689862457131852	0.020264274791221837	0.015578467224324655
19.749	-0.0049071641689995005	-0.05672934937630991	0.03488727018074922	0.015536898133706956	-0.004353101615309107	0.017407565013099813	0.02171136762432102	0.0018421181669374675
19.748	-0.008231097441473878	-0.06471910770629918	0.03475072120905587	0.01565763185436797	-0.003988137470153141	0.018630983445060423	0.02199734533102582	-0.007899006109441942
19.747	-0.00967376329053149	-0.05685311975797713	0.03858351465361576	0.015365210281540698	-0.0018826913889986585	0.013748370931846665	0.025213540557870395	-0.0007124785705041603
19.746	-0.019530746211338545	-0.04250061679045025	0.04501624913071822	0.015151997258712413	-0.0004967985133275121	0.010214273662588091	0.025994739847778447	0.007854358536902417
19.745	-0.02327495339378416	-0.05289569117396642	0.04284505552820761	0.013597858721354328	-0.002243564703572787	0.013622312196376107	0.02568730834625832	-0.00834898282538532
19.744	-0.01608626187857798	-0.04970969659575086	0.04305086622223886	0.01375624642041906	-0.000931007666671313	0.016163596057189977	0.027664794637632717	0.006243742558847742
19.743	-0.028103124371801513	-0.046569530227360545	0.04522184472110613	0.015036090262000812	-0.00037888806933406016	0.010420423615460805	0.024924251534685915	-0.004373184069928371
19.742	-0.06729435080522173	-0.035976541233814	0.048989332525851026	0.015690274072081678	-0.0023992804269648005	0.005285649355261768	0.015346300111638733	-0.03570491651280605
19.741	-0.05558470872252741	-0.0420286234879228	0.04516808885653223	0.015972915974715285	-0.0031072462440020487	0.011516294232329471	0.017307399907425136	-0.028063279390875273
19.74	-0.036817240897049075	-0.0446479767538106	0.04239217913999216	0.016191150729802928	0.0036308729286886887	0.012696896973115379	0.021209891238282985	-0.006554117879260524
19.739	-0.04685340738008481	-0.027033908620261116	0.04075892060047348	0.01629042851455864	0.00430652773619844	0.01775081743073681	0.018685248697826395	0.005219378281621445
19.738	-0.06985771304067612	-0.008634211525010649	0.038857506971291755	0.017074082068241125	0.00421299037578482	0.012323834954235835	0.01559695692155838	-0.0060235101961332305
19.737	-0.07180758932761488	-0.023654761852061945	0.04133995350544595	0.019324196691335338	0.00011923794917478858	0.0024750890838660666	0.01577753261635184	-0.03220387394985469
19.736	-0.04155784030375287	-0.03006372094364096	0.04591099836977808	0.01898586267584612	-0.0020476341835431455	0.0020635549627376903	0.01951674628813649	-0.006708779422575084
19.735	-0.04192492732612152	-0.018772661406321056	0.04900230506412129	0.016973335033699577	-0.0044855927932676565	0.0022444369629512906	0.016592251954826942	0.003036895535061923
19.734	-0.03609107285591495	-0.006847281436465735	0.0483199779684389	0.014623837077451185	-0.004925273445644862	0.013074925816377814	0.02155847559923263	0.028155113124242348
19.733	-0.027651803439428413	0.009226951742425271	0.049316966354813196	0.013416176139501523	-0.002929120164986365	0.013086220818410155	0.020860287997922278	0.05446539145073537
19.732	-0.025622161348883843	0.009122444416055586	0.0494243056635586	0.013354440565291448	-0.017303523161804613	0.03224936757724439	0.015676357124049467	0.06122487371146157
19.731	-0.031109597090771324	0.021474915053143917	0.050126962478431736	0.011602877360388675	-0.018635382428848324	0.03544300071015449	0.01951838116469684	0.06890277608249917
19.73	-0.01812434229339832	0.01747113652469867	0.051490507856182255	0.010805396391830868	-0.019443847519950097	0.03258717744756101	0.021746498305293294	0.07478602840692439
19.729	0.004764448865707038	0.008532925988355089	0.05133340225048144	0.007593975510636675	-0.02518160047851392	0.04102644979131398	0.02653944106109485	0.0880696019279803
19.728	0.011845993332290305	0.010084712223678238	0.050741363091048264	0.006591542770840952	-0.02499527018029557	0.04410270391630533	0.028897842692719777	0.09837104515386752
19.727	0.01730036268384616	0.0013067481746089626	0.04716129349845222	0.006373381335153638	-0.024494033029840878	0.048553792811391716	0.029725976282086286	0.09620154547361182
19.726	0.016212258675013302	-0.00432359057850995	0.04550676407745424	0.005689372444057206	-0.025010469953065773	0.0473065824151373	0.029181212953171	0.08538091708008633
19.725	0.011369943595701315	0.008528680762138308	0.043148700969176446	0.005641867501378073	-0.02177266168312908	0.04819574276624028	0.024536223349866937	0.09511227391150534
19.724	-0.024878679298818263	0.013817971084058023	0.04347697305302045	0.004757071440154803	-0.023329022870779426	0.05702547580293693	0.0162388278923169	0.07086978921057252
19.723	-0.03601101294894793	-0.008362038456014353	0.039920315469615275	0.005452247390587139	-0.02425907336827926	0.06423495014252456	0.01353780836449836	0.04097538822948543
19.722	-0.04158005285274857	-0.019265723146966174	0.03423722056368472	0.004478160869045844	-0.023737012104871447	0.07732440225499371	0.013545537136836927	0.03145699558313808
19.721	-0.051158588242307346	-0.028060703172056556	0.030096239674813674	0.002543925274029135	-0.02551592130237168	0.08509799785781258	0.012338771616160926	0.013002950089919807
19.72	-0.04775949411082614	-0.03137227885277305	0.026853999984744803	-0.0004126629788787639	-0.024075024372980813	0.0965759656370393	0.012391258466791122	0.019810505306325332
19.719	-0.04861193743879255	-0.004871134085975726	0.020918099263621315	-0.0011245615514141605	-0.0207856892099354	0.09411781312511014	0.00887890802102742	0.03964259010261362
19.718	-0.04647703573376649	-0.00397910848730465	0.01945061483179611	-0.0006574088020236957	-0.02178602460836032	0.09101810912089725	0.005100667083929977	0.0375691463212382
19.717	-0.036449355615960854	0.00763870788983656	0.018713125389406393	-0.000511189940524126	-0.020778499639391157	0.08725025950423504	0.003636403354896345	0.055863047587601855
19.716	-0.02325365203199503	0.012662063256295042	0.01929251615150207	-0.00038181918595814324	-0.018873604726636017	0.0764869868376774	0.007118926896577449	0.06593249030088533
19.715	-0.026054750543407224	-0.005954605311949912	0.016524520274508347	-0.0014114838401724228	-0.02135415074304614	0.08548241776315635	0.009153848161568057	0.047231947599089
19.714	-0.02115311744927073	-0.00024037521417152874	0.015931116221169717	-0.002575822451244214	-0.02011963239236625	0.0896202390295926	0.011113782701987596	0.06146240774370959
19.713	-0.038609378952164874	-0.006016644026713536	0.016677240124920445	-0.0047489756891154755	-0.02351067021119757	0.0934702797525393	0.007794106103869325	0.03726185099826829
19.712	-0.03975741570040281	-0.0033636402352730244	0.014964313025798148	-0.007693570217518264	-0.025300788419194475	0.1004074387070828	0.005020601233683308	0.03925633716049237
19.711	-0.045649689428921114	-0.016329879300439387	0.00794527605249673	-0.01092847240699868	-0.02845271237753355	0.11234108183281855	-5.524621308783395e-05	0.018925604371422544
19.71	-0.04541658484125399	-0.01265548270522121	0.005874303592282359	-0.01251768479559523	-0.029456325487253743	0.11540620194508389	-0.006599656413643018	0.02123442770804207
19.709	-0.055869195183076314	-0.024794875997610433	0.004558845016146229	-0.01375839445158622	-0.03466619941773974	0.1169488613337144	-0.012926443441223512	-0.007580958700152074
19.708	-0.05261744327844209	-0.03323557223641238	0.0050064597307315495	-0.013342840338219197	-0.03456490536284651	0.10807572646704244	-0.011744105813998651	-0.020678575018146184
19.707	-0.050851921655000076	-0.05596828126024089	0.0026380665078669097	-0.013904128858927223	-0.03937681518832381	0.11291528567894815	-0.013609513663456418	-0.04454779477567694
19.706	-0.03562209216342804	-0.04403820009700077	0.000997953287842357	-0.014411720810703521	-0.034251518546247084	0.11254737737188591	-0.011037494677269777	-0.014778200957651144
19.705	-0.05686510575988901	-0.03307208268831907	-0.0022362648686558018	-0.013435291948717953	-0.03040748830273099	0.11158166940183545	-0.014395630895676526	-0.02443456416647738
19.704	-0.06934967921840585	-0.021383116899571952	-0.008693171385922405	-0.011931190884494569	-0.029303140050835452	0.11156179344855932	-0.012818405060774474	-0.029098504990670904
19.703	-0.08114096611148014	-0.031135303017861382	-0.006996450638445673	-0.009459847118489684	-0.030290012786577947	0.10626245008983748	-0.01750921354051105	-0.052760129583017346
19.702	-0.07746719581898542	-0.04825739395457873	-0.004816516542388349	-0.007246370813534853	-0.030795145326759865	0.09378891932205846	-0.016633084247329677	-0.07479370313418876
19.701	-0.07148538939903304	-0.05966501471697683	-0.0049654644761512046	-0.006206686886689461	-0.01839425161263364	0.07533288468131971	-0.010312453435656899	-0.08538392241016446
19.7	-0.06671194860618979	-0.07293312850092182	-0.007791217963882602	-0.00509664985268099	-0.015782236502820624	0.07827278349579281	-0.011938414631657679	-0.09004239793070301
19.699	-0.07341648149539726	-0.07183882549622478	-0.011262781779628916	-0.004705849142193408	-0.013272065210580664	0.08833946932382108	-0.014121264069758332	-0.08615653380020394
19.698	-0.0766417262581447	-0.07159618735500661	-0.016154653158668708	-0.0026199082215381253	-0.004850209892360624	0.08527677773623132	-0.014440836161178972	-0.08658590714948744
19.697	-0.08891508124462444	-0.07652892053683669	-0.017166090113670762	-0.003820219126212443	-0.002350304247721091	0.08747097705298224	-0.017990002279603345	-0.10130963821608319
19.696	-0.10185580611694256	-0.07782535044384886	-0.01795932690703772	-0.005463909396055122	-0.0022842481584426366	0.09075137235094566	-0.02287766980235517	-0.11463726867138124
19.695	-0.10857648664446806	-0.08924641564668523	-0.018297552641647563	-0.007522900335636962	-0.002928569102764733	0.09301656628997179	-0.024636304390622144	-0.13355535808123076
19.694	-0.11935071070320014	-0.0955893246019599	-0.014779302792566895	-0.010357242997088179	-0.006488682940505086	0.09507700455043455	-0.02466696064487195	-0.15148825948488565
19.693	-0.10052805749764637	-0.09252797701821347	-0.016917555741177814	-0.012491002557664999	-0.0040065784803955395	0.09433723123731941	-0.022155895761008182	-0.1321339400577788
19.692	-0.09793136637010402	-0.09551440657952437	-0.017010597871381705	-0.015406438613591256	-0.004141435692328166	0.09582225029982006	-0.02007221093609246	-0.13418199482710946
19.691	-0.0894671138106169	-0.09217982789962598	-0.01266321656911451	-0.014976491545001025	-0.0037285102134605452	0.09057502934101613	-0.016143876569628013	-0.12244013069680282
19.69	-0.06289705056099493	-0.06348391180082125	-0.01177317794799393	-0.01381384631086302	0.0022545642342866046	0.08922647008930795	-0.006831587497524438	-0.06048695229707857
19.689	-0.05806580003726669	-0.059057567138802725	-0.009444277954766989	-0.011701150093262669	0.001997988379202731	0.08678227203928213	-0.0019414074601158404	-0.049488534805614215
19.688	-0.05682040326775528	-0.06627408120249889	-0.011630312079384808	-0.012270560239988626	0.002325074362962809	0.09990713250350058	0.0016973740608419163	-0.044763149923164214
19.687	-0.06101674742471541	-0.05584645182845005	-0.016762458285386472	-0.013916064372771153	0.0008445241828729522	0.11765084292497363	0.0013036573559919162	-0.029046354803476504
19.686	-0.05657866597907191	-0.03874685166254732	-0.019549368959715707	-0.014916237239366303	0.0003079614396224173	0.12321764280553271	0.002776669177651847	-0.00626551959554611
19.685	-0.06868282060707287	-0.032142212268342796	-0.025531465209633453	-0.01645448471288713	-0.004285208420474085	0.1401385250778473	-0.0027862243192773306	-0.006957666140563035
19.684	-0.05437685431343553	-0.030852434152772723	-0.02631049085065751	-0.01719278143218439	-0.0032841532090381875	0.1374847242540982	-0.005765539698954214	0.005468010296009851
19.683	-0.06460529863119024	-0.027086966609907392	-0.02382847604734195	-0.01761359347670144	-0.0041312458734372726	0.1326719280843589	-0.010917221819456202	-0.004593652554219396
19.682	-0.051330105574015406	-0.030941320332660283	-0.02744788596169645	-0.016609453103742844	-0.0015657971219926736	0.1280702882580007	-0.010182901956839352	0.00017572616389305296
19.681	-0.045237028463387396	-0.03480242686217849	-0.023276356358714168	-0.014271571118880999	0.0007033040399022639	0.11854702380932558	-0.008271727473940338	0.0016629450460667883
19.68	-0.018205190279525496	-0.03717154088124541	-0.019392857026087285	-0.012524007206325294	0.005211903458725686	0.09952261002635066	0.001172953501916929	0.017440918091892854
19.679	-0.018183307034981055	-0.04407726157956482	-0.016917590975240593	-0.012143004673422553	0.00794602192614935	0.08916333265882948	0.005848498933985091	0.005788190321769804
19.678	-0.004582920276884117	-0.03866224756216141	-0.014767292253144326	-0.00988896306080811	0.010445031056285359	0.08049348245447252	0.011996200254648315	0.023037090357759915
19.677	0.002775911217713478	-0.022088544755435535	-0.01728598914283186	-0.008804342661304254	0.012814220071486027	0.07803526311033782	0.015748778320356926	0.04544651783996567
19.676	-0.005644688371318374	-0.018740966485021993	-0.015807286818755983	-0.009060349020662883	0.012416857838456252	0.08741833556457745	0.014319221072570443	0.05058190270727447
19.675	-0.01447984919228773	-0.02294462503475536	-0.01889442258667895	-0.010885590018700597	0.01166210773829146	0.09832462723862267	0.012481484822340683	0.0427822481444915
19.674	-0.022120139995082333	-0.03162343980600646	-0.01958315166474378	-0.011676732434946935	0.011542974609676904	0.10421615506253001	0.011349377721230347	0.03075566577142741
19.673	-0.005147143725483971	-0.05259566092270873	-0.01546390259526298	-0.012244155707993087	0.013041898816815944	0.10690562476468735	0.011545793230143708	0.03449666063005452
19.672	0.004905967899096808	-0.040192494036881854	-0.017581606594301746	-0.014522434969329368	0.016201104075978634	0.10792742822982504	0.012616110055671648	0.056737964604387514
19.671	0.011837972496395288	-0.03709613799072109	-0.018870378343488703	-0.01629297177413047	0.017811261327972616	0.11280589011783082	0.016776838666452853	0.07019563583385846
19.67	0.015377659115621611	-0.024853645816598657	-0.017230476335996947	-0.018434492437731542	0.01919312421140873	0.1165078930893122	0.01587358756130719	0.09056006182601539
19.669	0.038669349782060713	-0.020601949356942484	-0.01438824703783137	-0.019054952694964378	0.020705823351685027	0.11413357606349717	0.017010278477889607	0.11946360010750467
19.668	0.037942012295478555	-0.018707858842127223	-0.014247363737669438	-0.020287424537340115	0.020171708849010983	0.11047597957119226	0.018332824713066742	0.11534705359854502
19.667	0.03561607256137567	-0.013185743981978248	-0.010895020101647113	-0.02155515656852458	0.019292763218697218	0.10083461170753427	0.01807006699492142	0.11010752683545721
19.666	0.028417050254505583	-0.011766335064075761	-0.010736135812795311	-0.020247480829648445	0.01544448470552684	0.09420951808141886	0.01653871225194603	0.09532110133493177
19.665	0.04147575635194389	-0.007389305255656176	-0.009839470323710131	-0.018426156192289156	0.014450315725437868	0.0874615508746519	0.019077296974569613	0.1077326911803782
19.664	0.06390072984351836	-0.0020948017391608786	-0.006364975322563637	-0.015592137618276602	0.018379662928500018	0.07875515824761337	0.022717107014445403	0.13698363633963062
19.663	0.054978752631443584	-0.0032122872077726683	-0.008086544432512	-0.011721233418681365	0.018891812823913945	0.07642936920967802	0.022375552163490298	0.12727986960606952
19.662	0.03934598337773476	-0.025504793311723617	-0.0071158089236096345	-0.008290320574753984	0.015658366634903942	0.07544356559713261	0.02095338883043496	0.08953699279968408
19.661	0.06457743193997167	-0.030061804833402483	-0.005701981322377314	-0.0044913402384310075	0.01798256763744277	0.05690647060422549	0.02357527817314775	0.09921134378742913
19.66	0.06220718866791586	-0.037847504410981614	-0.008167102426559936	-0.0036753727021618943	0.018867063127959938	0.05826989083628664	0.021624873618481644	0.089654163092459
19.659	0.05137463425867761	-0.06641031772934003	-0.007942872786347976	-0.0036700048486633108	0.014902712092827564	0.05909951817206771	0.01598784109875062	0.04735366915922157
19.658	0.05636116567305827	-0.08001525406303145	-0.009257772864295966	-0.004723004554311849	0.015269974667645236	0.048282366664459175	0.015312618563926073	0.025917475523523414
19.657	0.05249361514203521	-0.08700932639871617	-0.003793107197166634	-0.004137655509416582	0.017760116270937765	0.033302137145864386	0.012944521204852677	0.008615779453537975
19.656	0.057181607011550284	-0.10003575253395791	0.004005475785045398	-0.0017807588101446115	0.02101245305808508	0.016863211242601928	0.01589647648465764	-0.0027537642468198342
19.655	0.04335099737355286	-0.10473384726186552	0.011673852690043063	0.0005367645111862274	0.023649274216640315	0.008234250214448124	0.015655224626132558	-0.017288708255994933
19.654	0.03879540795709335	-0.11899452604701555	0.019261459669167813	0.002452278265061558	0.024479043990215388	-0.0036927002886777416	0.01651424099362231	-0.03769903645415518
19.653	0.055240576583505785	-0.12352157377200257	0.027055091700194822	0.004771050553463496	0.029196513937031376	-0.023348492073565374	0.021070609164492105	-0.030606833071372463
19.652	0.05034133629176907	-0.11583028734541934	0.029146099699174144	0.00698920099119249	0.03057832877794997	-0.029169808443768375	0.020148810905318726	-0.02794513002910204
19.651	0.046454037992401	-0.1074926674916199	0.03315546340997777	0.006005078416216669	0.030866018679725826	-0.02827002600259565	0.02124736687026285	-0.019282094995894283
19.65	0.05352274271124546	-0.1063901433597918	0.03120929375246284	0.0035048747393968682	0.03056563100971932	-0.021467785811370987	0.02104298084640366	-0.009055386958338296
19.649	0.05811228995917084	-0.09995169353699662	0.03334298082863363	0.002458600733629801	0.035167107958039345	-0.021537578214178232	0.019193493360335268	0.007591707728298758
19.648	0.04318190134021105	-0.08670273693004926	0.03517897977543605	0.0023018698888988	0.032844597934418296	-0.017335259351734855	0.01529896162375799	0.009469352657180075
19.647	0.03898262623056059	-0.0796123188125053	0.03598789825675919	0.002032197431349303	0.03108010769868752	-0.016803550125247035	0.009891679729654435	0.011666960679604266
19.646	0.03362843861575282	-0.08826862836433857	0.0386153481413789	0.001215275135102445	0.02924008186147109	-0.01886325477775408	0.005944761368879448	-0.004432739388387397
19.645	0.04956570205881228	-0.08804395991445269	0.03603464263438827	0.0017632312165467567	0.02881636431471879	-0.03251506633668111	0.008110985942153981	-0.0043790860266677
19.644	0.05850553480411058	-0.08764629713860206	0.036790370049460286	0.0014147038268523815	0.02908319515932245	-0.03934688118382379	0.008223861502017371	-0.001199374482680149
19.643	0.06504677708427398	-0.08856983570813615	0.03627189402278663	0.0018710241085724277	0.029631449434491586	-0.04379510824226873	0.009256327379187468	0.0004562006997197443
19.642	0.038978605728924975	-0.07684463243882345	0.03208350845834751	0.001536913312174093	0.027148001672720135	-0.040472350159957315	0.0048045585859295414	-0.01756995342661405
19.641	0.032972232909906474	-0.10262744607951735	0.03512254700485329	0.0024192708267714025	0.026423085320876893	-0.03560265514832395	0.0005679696591371908	-0.04129296516543324
19.64	0.028337341137980587	-0.10047243008744378	0.03707469952496911	0.003675282075620956	0.02834187234508878	-0.03809829895579764	-0.0060185651584045985	-0.04114153395958198
19.639	0.027987949498159637	-0.10099644248226536	0.03927299502186088	0.006949539231626112	0.030239138954467393	-0.05359746619290906	-0.009121012036325205	-0.0501442859690604
19.638	0.012956569226076908	-0.11242900086706253	0.042216446716500045	0.009699965533089383	0.027412445143653486	-0.0682827764873064	-0.010654412376262634	-0.08842635073504912
19.637	0.025839340752129125	-0.12415266133078973	0.04466763864376322	0.013639702465555459	0.025709532036970906	-0.08160938035534482	-0.009514159799291377	-0.09590582778771584
19.636	0.03880815176895602	-0.12736694793054948	0.04892929607764085	0.01656346519969709	0.026589992981181254	-0.09115563818546679	-0.008465690314774399	-0.08763168008854105
19.635	0.05821277639151212	-0.1199909188600028	0.049980918618272696	0.01742765531019863	0.02693766803487918	-0.09490408083923452	-0.003930775793541841	-0.06233598134437468
19.634	0.059568336402541	-0.11494359570974044	0.0509049951825844	0.016576564632876156	0.02769915437540149	-0.09178168643011642	-0.003780102490089199	-0.05197623154645381
19.633	0.06081679352916236	-0.1063289586256726	0.047687271103015405	0.014206573258651822	0.023927738258127995	-0.08904931624352219	-0.002614014812277965	-0.04873989872023721
19.632	0.08234913191865711	-0.08996926237108838	0.048873265171735625	0.013095644243989568	0.024563214263988442	-0.09439236774472715	0.00035298930952443186	-0.015480374517444773
19.631	0.09459297613860684	-0.0698719756851256	0.04819007321890201	0.011899898607826032	0.022724827124886993	-0.09366556026533424	-1.258345862353849e-05	0.013870239139762042
19.63	0.0883904476758266	-0.05354909774765204	0.05149702493046959	0.011135934687992233	0.02324545058387084	-0.08812772936606095	-0.0019741856990966866	0.03259203076444628
19.629	0.08393367208850577	-0.02971885320352019	0.05769269157108603	0.011630352242901765	0.02256507756943016	-0.09538526702154648	-0.0023918246162617507	0.050717673246857053
19.628	0.07568986311098502	-0.02749616019592782	0.057778074176509264	0.012474038709902047	0.020868749661714148	-0.10488177186647274	-0.0021296466788998103	0.03443279359670992
19.627	0.07213326143278209	-0.01858585984581751	0.06228928918344412	0.012535680176664954	0.022584509028248156	-0.10954789067165294	-0.005741759829421156	0.041408989303668875
19.626	0.08104784138272425	-0.02140085661210467	0.06634482955356624	0.01566307999768668	0.024122409920893872	-0.12031298101214016	-0.006000917232751313	0.045464323230626214
19.625	0.08645336058823982	-0.015765695143450387	0.06644372494418072	0.01568777128939569	0.025988134553481146	-0.126192629416912	-0.009562034604102543	0.052614666814934985
19.624	0.08335011759139466	-0.030068006842042472	0.06282851941512657	0.01429938604834824	0.022927664032502015	-0.12304614480785592	-0.015284171644056599	0.030291535437473094
19.623	0.0996824342624647	-0.03497866783182779	0.05779453078319641	0.015450695211776555	0.02431906834955555	-0.12537395606284818	-0.013393999913377641	0.036894104712317244
19.622	0.08703570842860398	-0.029789938045200692	0.0528512057508701	0.016586767827195814	0.02381357705395537	-0.11547571170268345	-0.014837929685578288	0.03502160931274112
19.621	0.08050806912195885	-0.03292965309748386	0.04799508115060647	0.016892121831081575	0.024567828337343833	-0.1107205457365179	-0.0158117924276322	0.02631290160698896
19.62	0.07720908779293634	-0.04748312220029227	0.04509605431719965	0.018165850904264147	0.024101829878472536	-0.11800321189562002	-0.016050659432032433	-0.0009135112030396186
19.619	0.059955179883078635	-0.04478209580270409	0.04321557953625721	0.01925665193342052	0.02304296885816637	-0.1191026595483562	-0.017819109064771688	-0.01841437514013755
19.618	0.04823186275089775	-0.05485822044920852	0.04043759595934926	0.020793065040104253	0.018452057716617176	-0.11335655941336942	-0.017625453034737504	-0.0403001983956095
19.617	0.051712787880205724	-0.05286375781245223	0.04217841024441338	0.022088569431346627	0.02062938790392721	-0.11802355443799506	-0.014331230503297654	-0.03427815679055435
19.616	0.052035116590396946	-0.03837082591465446	0.048015113352343874	0.022714152976970325	0.022836019684439712	-0.12582201146479477	-0.011541163147135158	-0.018592434775298372
19.615	0.05246198002547864	-0.03932791116380052	0.05159753092121466	0.023289567003358158	0.024475531333696843	-0.12382770908430896	-0.010396438403119213	-0.011331010964361177
19.614	0.0463313253069364	-0.02228076479041885	0.057772476825939556	0.02243776271078257	0.026333401032008652	-0.12664509328435525	-0.011930003298914471	0.003949107800893081
19.613	0.03621818049632708	-0.010498106334474677	0.06041021647449085	0.02322300128227539	0.026443179844062747	-0.13432970037186998	-0.011962531298643775	0.0014667713908114166
19.612	0.033531289585456925	0.0006553402755828941	0.06336984828214565	0.022782082516260793	0.025500174799904407	-0.14151681515420478	-0.01313572864161383	0.004321920305145888
19.611	0.04887414290250547	0.002428382461173939	0.07017225753156442	0.023764686572976146	0.026510185071640713	-0.1537610708686179	-0.011744937477597972	0.017988583671242786
19.61	0.057597081345003076	0.01722729925634603	0.07234733266838322	0.02552543442358246	0.02687121417676419	-0.1671265246675233	-0.007941957538497135	0.03244183720255567
19.609	0.07226556238291071	0.011013331364989831	0.0756947551772651	0.026403082594793403	0.027184374621662677	-0.17821693217347612	-0.00333830397580126	0.0343441739681456
19.608	0.061648470386006515	0.013749927069267365	0.07571480517005824	0.025293808955168195	0.025229992088776854	-0.1779098452399479	-0.0037942793100791405	0.023727158429329265
19.607	0.06135589654292506	0.025898787364031506	0.07814308512437318	0.024630127284065217	0.02803797990619561	-0.18250700984913326	-0.0032095355232595324	0.03555886637245731
19.606	0.070072757794434	0.030201305324559335	0.07910972463237087	0.023540926507169324	0.028944946693163054	-0.17797288266305955	-0.0012879953243762898	0.05389677828863704
19.605	0.04224283710589827	0.04288431833177686	0.07708544154693531	0.02197482305858145	0.028303943074014626	-0.16203551395940163	-0.0013880291128511857	0.05045584915780488
19.604	0.03486486721733506	0.0383438406485439	0.079735186831698	0.022205837979605292	0.030154084291835304	-0.15635903596851808	-0.0009159637858919822	0.04894478100049948
19.603	0.02678455733037932	0.046217607838414665	0.08073294072870496	0.022866973058410345	0.03225054674946648	-0.15686638377325846	-0.000445685672703533	0.051986241932117316
19.602	0.005327054455952052	0.05019472635502886	0.08506575660484916	0.0229777688524484	0.0329631925599152	-0.1538107052822566	-0.005189218460773581	0.04271779354593708
19.601	-0.010950454682098432	0.043173570154942276	0.08636689699463584	0.021818039113977505	0.031462825939321704	-0.150848664539609	-0.006914404456436429	0.021022212981169908
19.6	-0.018785938712047923	0.03810570796209234	0.08990870423124075	0.020937984703763846	0.03433505112612334	-0.15638096812758828	-0.007825397002440226	0.008120541183584074
19.599	-0.024671414848774553	0.026455131851822244	0.09180799885828428	0.019242552027614934	0.032603527722757875	-0.15259198296597543	-0.00786030981029917	-0.007154187354270647
19.598	-0.006110852038887948	0.017790844021839725	0.08976009331778911	0.019321878199895615	0.03474529010077099	-0.16374869974363815	-0.004730226318048203	-0.008241446142230657
19.597	-0.0004004157807271369	0.014636840691800046	0.09254649224749922	0.020588459500762823	0.033554373412854055	-0.1611501722723121	-0.003518539619963512	-0.00022442220012308667
19.596	0.0077515708528439475	0.024375628889594658	0.08897635255882808	0.02323704313991115	0.0346389719216873	-0.15951096475455984	7.805516669012746e-05	0.019468602608305297
19.595	0.0061402238826380184	0.03022291613465722	0.08548090939919728	0.021310251993396534	0.03008094127790617	-0.15441565417338587	0.0018144741028187639	0.018819588514409347
19.594	0.000536881512002374	0.02841629459963535	0.08350235114666749	0.020930031810929783	0.025947913697320857	-0.15035051197896188	0.0031399312643873856	0.008982960787593974
19.593	0.009175465564136509	0.026975250199265943	0.08577622708329713	0.02215671960579524	0.025748995600105573	-0.16015341405125483	0.007104411321447124	0.009679244001345566
19.592	0.005310982170168899	0.03480990712035492	0.09166870728123744	0.021606558038741674	0.02434067058303313	-0.16518480785812173	0.005236406062433474	0.012552017335414334
19.591	0.004614656936541728	0.038743279173859335	0.09681503247104306	0.019745848238716057	0.023130410028823434	-0.17019544867072867	0.0038334236365118457	0.012853778178254949
19.59	0.014315601784942622	0.036632483886840816	0.10307294655268429	0.01893301373363876	0.02172838336516758	-0.1759884354388257	0.004875891910193886	0.018693993884448368
19.589	0.04290523703539506	0.04672609548515538	0.11012161378067642	0.01913313200589517	0.02434189908825868	-0.18428425811430404	0.008719935869137885	0.05894371928107667
19.588	0.05405538808899557	0.03702235733864789	0.11431162898771863	0.019682081544055485	0.025376635926193103	-0.1868884452426176	0.01141955573421427	0.06355964664299307
19.587	0.04335251389081485	0.04107596842079175	0.1166260607427434	0.019418462206354015	0.024720118130007407	-0.17991046978669623	0.010632439339329558	0.0652826536040152
19.586	0.03545451146020717	0.024449819214845014	0.11649633210300525	0.0190901890135855	0.022626173822940743	-0.17677946015150958	0.010660476309801936	0.0413375654630741
19.585	0.01747372596991159	0.005099300676151053	0.11455422348409261	0.019593720806546422	0.020375453869005966	-0.1641500053931635	0.009004801655851047	0.012946419412544152
19.584	0.0101816310971925	-0.0023743475763469135	0.11422017798640827	0.020901688309113986	0.016636602882841522	-0.16655818388592092	0.004637748340643455	-0.006992431186711556
19.583	0.019426750175584928	-0.019374265983910455	0.11353462910457335	0.022656204145404146	0.022212357084166356	-0.1706418828677272	0.008224791248377272	-0.012186208341908866
19.582	0.022121501640363306	-0.030922233992312087	0.1138879463288065	0.02455373496613511	0.022409923508305063	-0.1661995285683	0.008319295159865625	-0.014148656117002112
19.581	0.05152155852686846	-0.046195311511676884	0.1164405778893407	0.0274641740877426	0.023946672975190708	-0.1718648227253068	0.014287819032942295	0.0013128492421587978
19.58	0.0431458177536177	-0.04450090496786441	0.1139334638387286	0.029301018657617917	0.02496142271276902	-0.16991824086460028	0.015385653432102409	-0.00307742286973145
19.579	0.03603124649465528	-0.05487295303097728	0.11343813616303056	0.02987420081173031	0.024046539166656444	-0.164875582629735	0.014869738960997303	-0.016358413024639695
19.578	0.025306915401451135	-0.05048560840538219	0.11278773978848111	0.03111286363970045	0.021612224665202184	-0.1578240335025347	0.013689606441952051	-0.017489898413082017
19.577	0.023682406941549772	-0.04778413945439919	0.11168890734094461	0.03291376653820777	0.021770253639404658	-0.1506920326084007	0.012173383765466284	-0.008420837602693076
19.576	0.008993625296123575	-0.04894192101074335	0.10742084196800938	0.03398016292346018	0.01604162188363034	-0.14148977417187947	0.00974458113334098	-0.02399544311139934
19.575	-0.006039585868119701	-0.04614932851159281	0.10881815289104946	0.034936997270412995	0.01729576031396096	-0.1490908602449501	0.006104555320121108	-0.04022886414923921
19.574	0.012572198193855577	-0.052166496652113814	0.1118753553323435	0.03772534171807784	0.018534820619361625	-0.16866740957712079	0.005358136642290567	-0.04012619036559606
19.573	0.0287886336160863	-0.04550657041445039	0.11245378636199899	0.038732707169181424	0.019481212732760156	-0.18458518245270472	0.006834699022663315	-0.03063541298712824
19.572	0.033061581524873596	-0.04732020534482473	0.11476575162495628	0.04116404386785533	0.019438250447921135	-0.1954995225604792	0.004952771094242969	-0.03439010043969759
19.571	0.03346394963136934	-0.04668616709193785	0.11725868854308708	0.04450239258444899	0.01812864979928097	-0.20066341722092673	0.00528273918124178	-0.0339959037546782
19.57	0.036355115924141757	-0.035115906686367104	0.12082305768708412	0.04824107922807919	0.022908961361580715	-0.21606438726010513	0.003748775974552032	-0.02285207974558645
19.569	0.047118563612027486	-0.04370566352632643	0.12221214970452543	0.052462966117365895	0.02478128288499093	-0.22648375069225946	0.006031514130109272	-0.023614451899676148
19.568	0.03869611377763338	-0.0391878868921669	0.1196285959337855	0.056762320317621295	0.021756771599057423	-0.22740472601421935	0.001235890328876721	-0.029748811278288656
19.567	0.03746344162097781	-0.04134174717176986	0.1210888333851603	0.05964329297014981	0.02285690012496744	-0.21808654811675776	-0.0008448007928318901	-0.018375827187272264
19.566	0.04760581651312812	-0.03554227225207551	0.12375928440844053	0.060392606028613294	0.027057816943615087	-0.22554565747129196	0.0011311066805390624	-0.0022724058295704452
19.565	0.05441157813239528	-0.04591065454502008	0.12923700151526596	0.060255555291735874	0.02470490967844796	-0.22498131802173926	-0.0007438760215885409	-0.0022829279489142706
19.564	0.05275721309210546	-0.043696466459309136	0.1312827100691969	0.061498437764361036	0.025053135894783196	-0.2270408218931701	-0.0008593403206029748	-0.0001457915320326464
19.563	0.07654735557276116	-0.04699618190757349	0.13477081224439136	0.06347306456128621	0.02755118321072736	-0.23538112909321196	0.005116013220413329	0.019965104588380633
19.562	0.08627281452945024	-0.037634902662095016	0.1365346390724973	0.06351736050061074	0.028668376124102224	-0.24114917879259767	0.00755256738235488	0.03620910877196781
19.561	0.08388833622516945	-0.04632237759918478	0.13515657215711396	0.061850385399827346	0.028320831791958767	-0.23156984527047975	0.0075400497952244905	0.03132390270440499
19.56	0.08120548759954271	-0.05208534327573666	0.13283971056786648	0.0611540228980072	0.026293900478509435	-0.23324557345661745	0.009083523666683746	0.016162204811571712
19.559	0.092823523605289	-0.05516741046236362	0.13187351984992635	0.05977761799645176	0.027583911965483487	-0.23092144721946184	0.014348569867903116	0.02596971573532514
19.558	0.07350620295835597	-0.05711161520134134	0.12958025384205296	0.05767215505621959	0.025743149981305002	-0.2208406810139083	0.013231310227972415	0.008549465622683883
19.557	0.08612452078801436	-0.041206975098314835	0.12891383139275003	0.0560020795804963	0.025434449904524037	-0.22486023514056175	0.012331648098999004	0.030407671426908145
19.556	0.10550704177272419	-0.03171888877257789	0.12693554186153921	0.05561661555804864	0.026724827005674356	-0.23239520855600038	0.015021282970055339	0.05066992886940813
19.555	0.10374031265775407	0.004945745230581444	0.11831618879276551	0.05463514436785388	0.025800253998133016	-0.21739256343257907	0.01093081939464735	0.09004508161450886
19.554	0.11266810043093223	0.031513767174255136	0.11301728611493989	0.05358009583119827	0.024166537939110277	-0.2155972807590496	0.010408014078071126	0.1193485067313862
19.553	0.11231382959411018	0.046184235904812354	0.11350938624587137	0.052781457803824594	0.024072005803432717	-0.20873401645856315	0.011076905118113878	0.14012689889348806
19.552	0.108191030382212	0.04345979797955035	0.11451219688300895	0.05230175202323473	0.018161093052293964	-0.20067360162014758	0.007529193569865811	0.13595226870015242
19.551	0.10490254437720203	0.044346466076096824	0.11615652701860846	0.053019028055996564	0.014275021667192966	-0.2012211679955911	0.006569025755936764	0.13147841919950576
19.55	0.09219058177157091	0.049129425616499134	0.11625658508987158	0.05203285640321642	0.014430246222135956	-0.1981366344034381	0.0043183436460401126	0.1259030606998559
19.549	0.10868946221335918	0.057927519037622055	0.11990672391182855	0.051269090275404494	0.014465697873952799	-0.19520825441552336	0.00849042115566423	0.1570502388966437
19.548	0.10183637981023619	0.06673460039039814	0.11961809858103045	0.05056782033634555	0.011745756770085158	-0.1925439841172869	0.007992245511778684	0.15795867177080858
19.547	0.10922345893410679	0.07482425253437786	0.1211839229324978	0.0503002362193774	0.014294731275032113	-0.19831931744467912	0.008820986137727083	0.17150728445071284
19.546	0.11171300577065235	0.07201705493903088	0.12183473721032811	0.04809215770313724	0.012215582471971409	-0.19823351624447128	0.010880830684739884	0.16763902185064872
19.545	0.12895288015786655	0.07015819994942163	0.12501128732710232	0.04817589047253179	0.017736044391405414	-0.20321511525799707	0.01380641333128807	0.18681918704033063
19.544	0.12232080266647216	0.07809582629445178	0.12447424393144235	0.04747676510982135	0.018047194631042984	-0.20086007005404038	0.014920209663900508	0.18955476257919024
19.543	0.11743240647124065	0.08884854365824868	0.12304127125549513	0.04517958888753082	0.01814533865870338	-0.19639066275232597	0.014949091269013337	0.1962564861788927
19.542	0.10900951210617826	0.08554731110482017	0.12346358160083248	0.04423850322009937	0.01827112334617098	-0.196773077254643	0.01305744849001833	0.18375695412345827
19.541	0.11567411349941548	0.08641945840740206	0.12470285344110277	0.0412698622636114	0.016023399998797316	-0.19488942113970076	0.01682157425521069	0.18920026647062826
19.54	0.11889112645751432	0.08273244275683034	0.12513996748150547	0.0396096360014111	0.016039583309084726	-0.19929292541173282	0.0210988177481104	0.18311983059461312
19.539	0.1303839043811772	0.07131434103714707	0.12371671644311988	0.03810569105857908	0.012155158057731263	-0.1910815802681185	0.022780883103922456	0.184594230709636
19.538	0.14921078314931346	0.08183309343253686	0.12370663683841965	0.03545700069093094	0.01259577881942775	-0.18600086023943962	0.027874551360942412	0.21680243269118904
19.537	0.1502300326277357	0.09662120249677297	0.12363618408432409	0.03249608130473636	0.013549548545294776	-0.18381342750513152	0.03394208240400243	0.23271962155373238
19.536	0.1389761241800338	0.10574725148449016	0.12142983273999963	0.028842129264604388	0.009068600430650164	-0.18099032310895868	0.03351473655596404	0.22307361499081946
19.535	0.1270413188803836	0.1099028043034691	0.12076347609214544	0.025903030196119836	0.005873732242231533	-0.17250306980177577	0.028711115508872176	0.21698129191257376
19.534	0.1212841966894116	0.11066394491065523	0.11988313920777127	0.02410847746207434	0.005399443715520036	-0.16980154747296705	0.02909157653555461	0.21153765451246542
19.533	0.11494607680412727	0.09776271781640844	0.12072928751483492	0.02272091868933135	0.00211940756965312	-0.15570633103167975	0.027873742967464032	0.20257207736267535
19.532	0.1079186207949272	0.09319899171905366	0.11906408003282909	0.021599961459851436	0.001829020208096388	-0.1395180554356692	0.02900432115876228	0.20409261877908857
19.531	0.08983515335114678	0.08399107131688588	0.1184417745475006	0.019979094095225136	-0.0003055367513367102	-0.11975917419974635	0.029702700653226444	0.19218238235967533
19.53	0.08519748382327652	0.091214513750427	0.11800546823512814	0.020707244861239538	-0.003998337165449506	-0.11195044395180176	0.028581837617464245	0.19917592955281993
19.529	0.08831882949481074	0.10473581672026544	0.12031447202500356	0.01984848753406343	-0.0008024422305714651	-0.10854128296179422	0.02759039700335819	0.22387388058177748
19.528	0.07199400585600202	0.09673931086155818	0.12137430393604198	0.019237111452524047	-0.004988710579877598	-0.10543841897576911	0.024150153087123982	0.19891760255047952
19.527	0.0721896035864642	0.10500387633421315	0.12237251410051098	0.019768066084012048	-0.0024208529421567704	-0.10634870436124988	0.022371780609979908	0.21056450280179373
19.526	0.05107741083426376	0.0932638178761902	0.12391756799047737	0.019833704440416433	-0.002831690399331066	-0.09892569927738215	0.02253264351155515	0.18633511146463455
19.525	0.039179750068726094	0.08850107008602137	0.12546940338399715	0.019126861898302927	-0.0023841605691217183	-0.09531546166541105	0.018128239359976206	0.17457746320251477
19.524	0.03547076166914831	0.06478101395246494	0.13239710713867403	0.020863316577912627	0.0008511283734886632	-0.11021280623466545	0.019700937117602457	0.14415052147702312
19.523	0.021528550560826254	0.03856542356559256	0.13568848087470275	0.02114373992670071	-0.0033287259767247335	-0.11057211261243793	0.018451430347418807	0.10302535633865961
19.522	0.01313168068605819	0.03133781740310493	0.13438707508800096	0.0197755856972881	-0.003685004237993894	-0.10880848969090628	0.01825317888544209	0.086138664945552
19.521	0.023443293754644046	0.03207067864953839	0.13373464587817363	0.01844276126219846	-0.0008861671934035087	-0.11031302257444864	0.02117365273767824	0.09649218977670238
19.52	0.025480566454845643	0.039580900382073736	0.13241508824548998	0.01537137011552936	0.003178020689388994	-0.10442890225431523	0.022164740784182513	0.11159704363301248
19.519	0.014056060355589928	0.044457438901992496	0.13028350133437705	0.012878431900877452	-0.0004098204679179318	-0.09343401443951382	0.019157710462201827	0.10783159758540517
19.518	-0.008777420304197037	0.029490600614793472	0.12497675777737971	0.010012624075020682	-0.0028401133268216583	-0.08574181664753411	0.013143352263730534	0.06712063218864106
19.517	0.010878044779099483	0.0192696993255419	0.12349394071945774	0.006612292660599373	-0.0015657443499978996	-0.08295158631109878	0.01436810714832415	0.07573664682360182
19.516	0.0017619471728380631	0.014229744689150614	0.12090833267407142	0.0038245668093281893	-0.004448186502558293	-0.07280346137850024	0.014793055473876215	0.06347294346432975
19.515	0.016803240555979926	0.009039931275158786	0.11980138911080118	0.0038346457037627957	-0.003618091430509729	-0.07006185729934611	0.017220803637278514	0.07579925791584685
19.514	0.001754443963975838	0.006684253312238653	0.11746745174204687	0.0032892281716243588	-0.00788011691384316	-0.05893476967881739	0.014978302213743078	0.06238049059722517
19.513	0.01639201288533343	-0.004594364411553364	0.11501377087868558	0.0034896176594418904	-0.007703436403817321	-0.05565941699993093	0.018898138799949393	0.06693818360815929
19.512	0.009197770924503246	-0.0032664898184116	0.11175627677625144	0.0024746560477169055	-0.007238407517450085	-0.04293188574332962	0.016490099832972227	0.06999192066928028
19.511	0.007344750324305593	-0.00200440018312964	0.10767550126769088	0.001072080344834525	-0.006274124579278784	-0.03060509331023109	0.013750850580514395	0.07720871386419148
19.51	-0.015330804783256546	-0.017469761732339606	0.10266368771275314	-0.0002255738047329814	-0.007762832762687744	-0.017076176996310366	0.007318834526750528	0.044798537633425894
19.509	-0.014655801031967286	-0.02110070639483297	0.09918503971047699	-0.0024216818907882853	-0.00712356252045776	-0.0050570754376186855	0.003771554852547432	0.048826212434812
19.508	-0.025769909529976154	-0.012819902360349467	0.09650884189851627	-0.005445240217304637	-0.006540280866885517	0.0056257235109749	0.0025342528583012225	0.0515592324349754
19.507	-0.042031707971691645	-0.017330812190263778	0.09661326501001799	-0.0063077963818143346	-0.008122469202620941	0.014820527815909479	-0.0017573373527319802	0.03764100707953677
19.506	-0.027697033528548687	-0.024297017308222202	0.09600614664739648	-0.006542331940115886	-0.006650122436790085	0.00997654415538829	-0.0014868328029908895	0.040796185589107914
19.505	-0.016149145914821084	-0.036211269093450404	0.09887989601620006	-0.005913346531009722	-0.004159487922861693	0.005539710926647956	-0.0023915481360878843	0.041986357480705117
19.504	-0.025885878210101687	-0.03720014720386722	0.09714875522468969	-0.005138552400097751	-0.004544087534797292	0.010450036492164472	-0.0036749872215118273	0.03483012636799021
19.503	-0.0341027293142222	-0.03402149966737866	0.09611942177912436	-0.004887491394191201	-0.00642337338189769	0.014462790414215831	-0.004373938575817249	0.031147118435650434
19.502	-0.024519879645237275	-0.022582084085808418	0.09337684064183538	-0.0057229891326588955	-0.005278004556402038	0.012305248684309156	-0.004224486457989229	0.04757913190603791
19.501	-0.033165566556899506	-0.007461021973861115	0.09249108647585658	-0.006187349777388107	-0.0047798102679799115	0.012842090507919401	-0.00800403063746824	0.05373942840764734
19.5	-0.03159159634311681	0.004664480970342666	0.0908099814645178	-0.005047447650842862	-0.0022096666579916047	0.006029370420097102	-0.010399833748338416	0.06265512220300629
19.499	-0.03245637187018602	-0.002267753125277494	0.09102719855649877	-0.0035512279693978854	-0.0013745820358126437	-0.000517272910125044	-0.009884869449656719	0.05085999064569968
19.498	-0.01679473182661262	-0.019014267288900655	0.08896240122966059	-0.0021329709082751336	-0.0016498069048305197	0.00337542687522685	-0.0055146579753406755	0.052746051176268516
19.497	-0.013134537030022209	-0.003387172092525148	0.0856983465462422	-7.491375448331894e-05	-0.0004282413219725001	0.0033556065084709985	-0.003524186366830051	0.07202908885571002
19.496	-0.004031531437705738	-0.008483740227995362	0.0814343283861323	-0.00045733248865698073	-0.003890377405068257	0.006314456526514078	-0.000705266919172054	0.07088580335322003
19.495	0.007301921075699269	-0.011170892874974747	0.07727467849557002	-0.00226924220088609	-0.006754140607507786	0.018256356420618403	0.0012046766278173138	0.08263868030851906
19.494	0.007826112204604385	-0.0010898228578772873	0.07403171433546873	-0.0044207688522739375	-0.009764682044089312	0.02823961956293175	0.003652891358276733	0.09482217234876433
19.493	0.012834423557625207	-0.0028944474468710624	0.07234296235679949	-0.006962859221849804	-0.013578928816234459	0.043180362961286356	0.003515822575098859	0.10492151339075573
19.492	0.026858707754379374	0.0084529095350927	0.07248967329166778	-0.006935605052194482	-0.006769216567133363	0.03936712281178956	0.004891598790684348	0.13346359177360156
19.491	0.03627134184853453	0.009509402463811156	0.07271900400345643	-0.006977209844733601	-0.005423132755646876	0.04227729646552625	0.007940922635812697	0.1483767021809479
19.49	0.019554690784056916	0.007675115916896402	0.0678700263565446	-0.007471347826754737	-0.007431889249495782	0.050450586944587705	0.008235718922533053	0.1306471829258351
19.489	0.019246959775676586	-0.00692281041920495	0.061701396243362794	-0.008804093162674498	-0.009772381116311735	0.05943769220815032	0.009609542272382754	0.11488676352899851
19.488	0.008743943962909562	-0.012285392474184142	0.05620435755800024	-0.010007171008267868	-0.014835210237403196	0.07481816485464776	0.009431080821960869	0.10263869265570236
19.487	0.01762072573554274	0.0017797336211398118	0.0551691356654791	-0.009444636366659154	-0.01306304107284273	0.0725691573505971	0.008692112273976704	0.12463107493325687
19.486	-0.013316822651031401	0.014287018631997661	0.0546805156093928	-0.007210661514918115	-0.013441033453982065	0.0759180026802806	0.0035922591589914177	0.11091701930173947
19.485	-0.016841400225458436	0.0016228807516158739	0.05287660602283584	-0.006973507794463707	-0.015094277793755495	0.07878335037206252	0.0009299427689031248	0.0943736513328366
19.484	-0.02758516908906472	-0.005977064549053779	0.05025197510638346	-0.007589542652709724	-0.016182352959130952	0.07895177359748118	-0.00016755924132816347	0.07186961945390546
19.483	-0.007692220650901582	-0.007515224008764143	0.04996816550673078	-0.008521213343122724	-0.01322088965253343	0.07203870360321396	0.0009775516734791267	0.08505732145462286
19.482	-0.024895926501868004	-0.005020998346306982	0.04912297955462641	-0.009039938919957358	-0.017309603162845022	0.08151256596506506	-0.004512608376677996	0.07436907858871411
19.481	0.003104103013916948	-0.026643876035562286	0.05084521337148917	-0.009157694558752816	-0.01813813964535882	0.07421170289088774	0.0006957362517763244	0.07422130903661994
19.48	0.004608549027039999	-0.03363602236072083	0.05046303386672957	-0.010306858117543172	-0.020576291403361147	0.0791609451051496	0.0014525011115917863	0.06971335611729401
19.479	0.028633139122276496	-0.022958122400700276	0.05144293106799136	-0.009937595883198647	-0.019466876930398946	0.07877476981105325	0.008030097621078092	0.10648824478702323
19.478	0.03384434387271806	-0.018689782106794617	0.05184441568142528	-0.007934517500261862	-0.018978686530708444	0.07564995100758232	0.012169447103822506	0.11573572442396074
19.477	0.06123672938957547	-0.030222740930417658	0.054487281241479835	-0.004824635392944643	-0.015608321497853517	0.061514318638390186	0.017439526831282137	0.12658263144822968
19.476	0.06211550660088161	-0.02622576018505729	0.05286508329421036	-0.0043791975846998454	-0.013584174548285866	0.05779767160725502	0.016475587027644067	0.12858912918430399
19.475	0.036378570991105974	-0.03274406220854331	0.050418651885529187	-0.005641491231773266	-0.01611727180602962	0.06987655629224943	0.009350491089117341	0.10217095392253839
19.474	0.00975017587487148	-0.02865653583450367	0.04447971315599286	-0.009373345594306137	-0.02095763173802201	0.08773894553678474	0.00317068527179476	0.08298132140081727
19.473	0.026583769372547472	-0.03549715440103274	0.04016266976671634	-0.012325309057511724	-0.019416459626254046	0.09236363007321202	0.005135772497019353	0.09187114612767733
19.472	0.02299377025047722	-0.046159154540450054	0.03477891317383186	-0.014918459135101259	-0.017365278553400643	0.09774659392269935	0.004950629610520174	0.07707638511805648
19.471	0.010332585538550987	-0.05090771986589804	0.033559037213987786	-0.015796429024001135	-0.016603008903381955	0.0980837638734835	0.003084270277369683	0.05866822883274114
19.47	0.012548778949401651	-0.05872262786202409	0.03202931949149601	-0.016661219749375178	-0.017226933212024953	0.0960653771804365	0.0038349780445869897	0.04803269479790995
19.469	0.013904132634991129	-0.06472500023287342	0.03426973311347581	-0.01685822258170422	-0.01864698061927772	0.09708031946382167	0.003732401073206937	0.04502398177843325
19.468	0.01265861838629423	-0.049067798999002044	0.03358323225220872	-0.017624207730944974	-0.016623033113649655	0.10326583108580323	0.005162080492132404	0.0661926418807095
19.467	-0.010262512569187976	-0.04068259220694337	0.033710830283892435	-0.01701542709914694	-0.02113086076743631	0.10348912443346592	0.002334134298844326	0.04810856207464376
19.466	-0.005173919538649763	-0.051491428350578516	0.03570301405864029	-0.01649801250355143	-0.01724564139415463	0.09833214540114987	0.003706413996232172	0.043626157672855825
19.465	-0.035414424649357734	-0.05566634699789397	0.03850129249262135	-0.01596372102846022	-0.019546307967232224	0.10082679388486415	0.0002409511031773448	0.01273728573454136
19.464	-0.0478585240726801	-0.05001167131551121	0.04128444669589548	-0.0140707149838466	-0.0162811368844773	0.0881627451234559	-0.0012431167518967001	0.001225144562836178
19.463	-0.05202733276016147	-0.062228318333086285	0.04427883166226998	-0.013059202279918303	-0.012825300879491408	0.07774507451178092	-0.004125179806059087	-0.018116248078606567
19.462	-0.0451920469767888	-0.061811697019908074	0.044790414070405404	-0.012842080041372661	-0.012614604929773066	0.071460714185557	-0.0060263918911900305	-0.016209300711880203
19.461	-0.0495159319246401	-0.07238600721090549	0.04178137667952697	-0.015092230718635413	-0.01417557299319494	0.07836697171879337	-0.0071803589308920834	-0.031021394449055606
19.46	-0.04540768758866953	-0.08377237607731214	0.0409694392973563	-0.015633298787406602	-0.013613668359936604	0.07511971331110967	-0.007359165166302972	-0.0423378782048589
19.459	-0.03689903592154753	-0.08238376982004425	0.04354753790265331	-0.015363196723139794	-0.01320321286826509	0.07319696989932556	-0.008132686840585102	-0.031104707531017795
19.458	-0.02933899180735544	-0.08270158041235653	0.05116819337806433	-0.012341645832004033	-0.011585338721006089	0.061494675294578194	-0.008951521649218641	-0.023304688100079574
19.457	-0.011805532449216116	-0.09012997060765837	0.05301474246302629	-0.009530002501453971	-0.0045439246964313895	0.049112888518506814	-0.00510255215051636	-0.013881799273226747
19.456	0.0015524685818517625	-0.10282785206668876	0.056271409434343944	-0.008448730165770968	-0.0016657453168660297	0.05473545070585839	0.003141131711309697	-0.00038299882727166334
19.455	0.003850156615338385	-0.10188567883600719	0.05809655850989337	-0.007521550888400341	-0.0007363089367844466	0.054643313960320405	0.00793081636838977	0.006446490424360185
19.454	0.008074405384586036	-0.08887703332289743	0.05791117603361062	-0.00652970568784994	-0.000649360108176289	0.05347204918848547	0.010685831691850112	0.023401531487758476
19.453	0.006083997600729418	-0.08086280971157933	0.06064055015559777	-0.005442294401542647	-0.0002438629704508699	0.05148916724874386	0.010187655868842072	0.031664747921498204
19.452	0.01023152339099287	-0.07528943901094198	0.05786064473110741	-0.005261081991296379	-0.0018064179219443588	0.05330822497253429	0.011864056245949328	0.03904345417045185
19.451	0.02642890804064635	-0.06582494746172429	0.0600556804167951	-0.003704217609761251	0.002215910295538137	0.038555856384432374	0.014731893527391016	0.057727190065926415
19.45	-0.012403185246456339	-0.051712036645492176	0.056797399550240435	-0.002983377654964592	-0.0010137330534707445	0.04646301782822437	0.009096607001230161	0.03514808477808096
19.449	-0.019362381917909843	-0.05052415662062071	0.05825535628171341	-0.003298294407786173	8.659293484747366e-05	0.04560224486049069	0.00868691389083942	0.030759361130734852
19.448	-0.042225927237392824	-0.053522661622602996	0.05542671153223111	-0.004504787189906878	0.0005426207353265156	0.04443492443240338	0.002270430624605524	0.00015088065005830487
19.447	-0.05282366580800435	-0.06131966301447456	0.05053480968737656	-0.007236975183257499	-0.0019490527349814712	0.050171061793779614	-0.004359416347876177	-0.022623485259561704
19.446	-0.0734527280247228	-0.06756756401728747	0.04795990011615192	-0.011206136514507747	-0.006221438450312533	0.06031913813552592	-0.00970181268666348	-0.05016882875515272
19.445	-0.08457407019893903	-0.06751245793438176	0.05116674895484152	-0.010753168091691023	-0.006968701290078982	0.05795736217345926	-0.010420074106856525	-0.06068428638679002
19.444	-0.06845239107570578	-0.06177397992737976	0.05474582517552129	-0.008226297983609854	-0.0034031811484620533	0.04724568969655163	-0.00606713835161532	-0.03986433526308453
19.443	-0.05827156818362145	-0.059738103238891505	0.05810594587805795	-0.004802621877971092	0.0004036379624787756	0.03620149144636198	-0.0010677782923602663	-0.02810121801358534
19.442	-0.068513165172992	-0.05488112510610055	0.06236989599432974	-0.0025285239242931468	6.005286360810658e-05	0.029596175670302927	-0.0016361714994257426	-0.03389668967514492
19.441	-0.06439594607797439	-0.047538220246108764	0.06319749240660055	-0.0009450343842063447	0.0016048621043234235	0.027779993291209948	-0.0006778535497842242	-0.02029685290615557
19.44	-0.058355619693771565	-0.04602225118004899	0.06172246604352516	5.076526255543001e-05	0.0005290188154898345	0.030006748708023778	0.0002549577921024948	-0.012068872044226353
19.439	-0.05536259452912162	-0.04081008535108044	0.06178732667445619	0.0007994961540278567	0.0010023302770525433	0.027942607848330248	0.0015822791690247584	-0.004640918926335225
19.438	-0.0432667020563553	-0.042564381748166014	0.06005105291168178	0.0018354049226489977	0.0022761738512855345	0.023568096874612365	0.004134067530402241	0.0018996447557073637
19.437	-0.041457193275372894	-0.05229118407051292	0.061433109090517135	0.002366935566505468	0.0033031445382505353	0.013174020766433259	0.005254860601102251	-0.013471167384179417
19.436	-0.04981931979058807	-0.05647650342818089	0.05774150802179889	0.0016943553126722577	0.004321372878714591	0.016748467520944388	0.002999869244654896	-0.02579011948463883
19.435	-0.05716392578795393	-0.06056259348890869	0.05454871446507781	0.00046639783321289485	0.0024769938551862936	0.02736008381253452	-0.000775119061073859	-0.0328743293108511
19.434	-0.03548351688668294	-0.07063562657068534	0.05183603403543291	0.0005328643600375216	0.006233742694060851	0.031656562165416346	0.002218271699112151	-0.015859940202420653
19.433	-0.041833232930800435	-0.07186806514485244	0.04841368856133332	-5.250314984106552e-05	0.00651287463933059	0.03778580189791292	0.0011621933832151043	-0.021041436126917112
19.432	-0.043725768790317865	-0.07781630756653968	0.04426038106985253	-0.001150716287139808	0.003064460831462945	0.05483308274139631	0.0014515172478875016	-0.020534868001285567
19.431	-0.05813755898584905	-0.08669538391766185	0.04322288726006107	-0.0029749989827276835	0.0014649509057518273	0.06344127248563236	0.0005885509869010264	-0.03967883123479332
19.43	-0.06066842475195067	-0.09533302838863822	0.04338397065207822	-0.004538432668952375	0.00039480180062678727	0.07039975367807205	-0.0014582649222090183	-0.0463613596787642
19.429	-0.06653523414186857	-0.09049215088238594	0.04305470291042912	-0.005701644632696734	-0.002831105253367383	0.074717267691085	-0.004148040667846686	-0.047788164308804504
19.428	-0.06897123260983662	-0.08751132387362137	0.0420013100581178	-0.007633538449118404	-0.0005537092630536478	0.07581521720703854	-0.0074626051871486965	-0.0468532769304737
19.427	-0.08525646232766793	-0.08333177889596755	0.037773997706946894	-0.009953148076573548	-0.004688991746939486	0.08669864259251181	-0.013187921404145264	-0.0587577407476898
19.426	-0.08635092985686299	-0.0730918036319883	0.03930168260175737	-0.01212893906896273	-0.003451796482799807	0.0800623250474013	-0.017145073014084744	-0.05565946139145517
19.425	-0.09322149259226009	-0.0646079728151232	0.03781115395789847	-0.012233815628158062	-0.004388733276125656	0.0674289751077044	-0.02167741331658668	-0.06921188524606414
19.424	-0.07432603101837287	-0.06610797587360562	0.03842403526831717	-0.012428258403488712	-0.004447740141570122	0.05539886201126709	-0.022918463283090773	-0.06348710815745306
19.423	-0.06606504177461048	-0.053329381829613	0.038922869497884705	-0.011121560479081083	0.001167805079644424	0.03959448746680394	-0.018673809156039667	-0.05083082203897149
19.422	-0.055495978463187434	-0.03977636740743584	0.0403360642855084	-0.008757787024781472	0.004113046525601405	0.02460215173054614	-0.014861367261931768	-0.0349788703537488
19.421	-0.06887800422516932	-0.02589318508069738	0.045236158686394745	-0.006675846957959308	0.00560670707727251	0.019289067497901158	-0.015538704287240357	-0.031315103002257594
19.42	-0.0767399929193271	-0.012285624637941694	0.04635551597243026	-0.005525415476281381	0.002719373211879983	0.022593100102231922	-0.01913542133574797	-0.022883043747008003
19.419	-0.05167257355339672	-0.010254614493386605	0.051594627757399536	-0.0017760926838583657	0.004703258239890928	0.007590833290418431	-0.011792681980922204	0.0001854385570672079
19.418	-0.03938958222286448	-0.010049188153982591	0.05653317193695173	0.0028173150936767755	0.005469251898292171	-0.0003906673883120604	-0.006935961045585692	0.014990301163761544
19.417	-0.04141028769839039	-0.0017800881821514736	0.060977625564095916	0.004978641356955471	0.0044846115306018675	0.0005817619894719073	-0.005061340239716827	0.027832264560583297
19.416	-0.0346698299688164	-0.002101424643656813	0.06240204652562742	0.005701596145810228	0.0006559881083747499	0.007825567328969107	-0.001539134544929155	0.03981394349630829
19.415	-0.039419896567020274	0.004098662669647091	0.06440049173631213	0.007942847526063446	0.0028170561548455098	0.012486118861647633	-0.0018908993822277509	0.05232528038149553
19.414	-0.035220264303200466	-0.006376170783558344	0.061594117221748235	0.007205442430711528	0.0002922261030864348	0.0231365164254127	-0.00046705420301229594	0.05063186709420009
19.413	-0.04584927946485795	-0.01516276613234524	0.0601443185523598	0.005393316419015193	-0.0006153336570200452	0.03037878427350904	-0.0013095476753184343	0.0342890399906608
19.412	-0.03833255725855622	-0.028998656490053953	0.06046848440422359	0.004865663184522084	-0.0016937379342625292	0.027915754168239992	-0.0023812102491396203	0.02422495007411296
19.411	-0.03187478801573462	-0.03598702551367072	0.05966719677195531	0.003526255874550799	-0.0028124724386202615	0.030868595876091476	-1.2063267464057503e-05	0.023387762554571978
19.41	-0.036451071396719215	-0.029180889773005703	0.05923084758827368	0.003001986148996494	-0.006263316210813663	0.03205986010715911	-0.00034333587298096546	0.022397416463890707
19.409	-0.043874851600886444	-0.026434562763379077	0.05902020901284377	0.0020683030791373014	-0.005295403212573824	0.03603416886500277	-0.00017790803639972097	0.021517863380144497
19.408	-0.03697536812368618	-0.030132951837960498	0.059287102799542524	0.0006452702042505365	-0.004737262626930416	0.03590102611424317	0.0004127318134301561	0.02398781652945914
19.407	-0.036612073940780476	-0.019296424297864156	0.06048543042654764	-0.0010759338464714219	-0.005784845636891411	0.04152712018056448	0.00039871651480183345	0.03924327288510465
19.406	-0.022399341785020788	-0.01762221108013229	0.05875648185452054	-0.0017273639010921826	-0.00634100217625555	0.04753355184724928	0.00038998036464743535	0.058200114759269006
19.405	-0.007544251898936594	-0.019947934439989545	0.06192604040306193	-0.0016593713474080118	-0.007811494967842059	0.04841026924087011	0.002725556707519061	0.07337325698975583
19.404	0.0003927384259778677	0.0027431040513441474	0.06800919640661096	-6.874623325536788e-05	-0.0070689139429509495	0.04075398251988105	0.008005825839014769	0.10476136122760771
19.403	-0.008501211500248296	0.01418577857218839	0.07289975960471473	0.0014943491615797555	-0.00913628312525816	0.03258738083686996	0.007653710113946666	0.10352977354984638
19.402	0.016128861003103623	0.023165430908135498	0.07742349308909979	0.0020345951416036456	-0.008039078861045823	0.02105360725499139	0.01088363525473568	0.13176690853588813
19.401	0.010705393947596953	0.035954747606719906	0.08143858302246088	0.005437051989895636	-0.009050754391340732	0.004595760046935737	0.012273201066375528	0.12908078222226838
19.4	0.03818510342087933	0.04224502660418228	0.08405936035859263	0.010983510944366337	-0.003681587348765447	-0.02239123673420007	0.01972114037962225	0.14940017724505505
19.399	0.037218835274823725	0.06952150549629454	0.08551968914668961	0.014016071002408204	-0.0029605465643136597	-0.03540289811406527	0.020345751684241797	0.16791265624183715
19.398	0.04103108733491734	0.08043623986690385	0.08629176960365204	0.01600848310484171	0.0008960104835509242	-0.04395356908306525	0.02274166583463355	0.1807100213108006
19.397	0.031214138022982674	0.08018663901108436	0.08802632714061698	0.01941105264735654	-0.001794194204085997	-0.05755613091479095	0.022175486380577425	0.1594878317031636
19.396	0.04048447396337096	0.09442045234342977	0.08738993326869693	0.020888393695439156	0.0017174995828694861	-0.07218555982193742	0.025306645936691297	0.17271519303186889
19.395	0.023486532477591027	0.0942345554210764	0.08419152579943567	0.02024770088557659	0.000588164376315703	-0.06275647274198803	0.024320972449558553	0.15999200621800735
19.394	0.009386244891294915	0.07624033569324684	0.08486975761032944	0.01766720048077275	-0.003382159918654537	-0.0463908017445549	0.0213860802161161	0.1383905770124345
19.393	0.018173937032694987	0.07572736336548136	0.08234183710634646	0.015656212385092516	-0.0012711225053880781	-0.03483223060310081	0.023147701098994666	0.15579599678112643
19.392	0.006145687816204948	0.04802815817209183	0.08315778265329499	0.013121267337427689	-0.006608194201163542	-0.01736756044198362	0.01535880438801751	0.1264771413358723
19.391	-0.0016796268656316116	0.04231033212283375	0.08468954312139054	0.010183252201239945	-0.008574323622671187	-0.00399365608122082	0.010656217403899326	0.12293552087594062
19.39	-0.006245853042440075	0.022957214140563842	0.0849847074491219	0.008273414891924347	-0.01142668291984883	0.005640409249327405	0.0050862947942684755	0.10418320976864859
19.389	0.021389676190019635	0.0024170368343421345	0.08917044918795014	0.00587257548852449	-0.0046376803628094265	0.0016513021404387374	0.008888453763681525	0.11586335947846571
19.388	0.01411734663855313	0.001849989596012236	0.08768483766511181	0.0022846807987964013	-0.005990672906274419	0.007042250914417458	0.0022982978815759836	0.10698843270661662
19.387	0.008680064063064208	0.012639151348635913	0.08418575778115489	-7.244962525820853e-05	-0.008047142817214414	0.009794049421992135	-0.002096961844207712	0.10717943017237452
19.386	0.0231079864909427	-0.004360893102024477	0.08270553486692656	5.4650800701772084e-05	-0.009790049036067394	0.005552308725341071	-0.0015713843654543425	0.09726953874582023
19.385	0.0190934823685609	-0.0014412953597551237	0.08559805956807942	-0.00036771578019578754	-0.005894571670841842	-0.0001944178720227896	-0.0037991580336784736	0.09679354125382478
19.384	0.021141135683344636	-0.0012793722412149933	0.0834707002929429	-0.00068934488148642	-0.007460567709116184	0.0025745003530648347	-0.0016978788447188364	0.09775705149753477
19.383	0.017071403685498865	0.02127810098448979	0.08602876929451853	0.0001354940155708917	-0.004943691953887885	-0.005837384083027253	-0.004691328829322217	0.11373269194316293
19.382	0.005134641870125911	0.023472231861751958	0.0869867119656842	9.229083342088273e-05	-0.00962539419954389	-0.007104321328530894	-0.01022350382655901	0.09895616100290816
19.381	-0.008873079716005705	0.02463003966963928	0.08756858095454767	0.00040200807809487316	-0.011487071966009843	-0.001872961335651624	-0.01111228033203826	0.09036751568461465
19.38	-0.013526450984911342	0.026468658704883907	0.09172947540074805	0.002012348672712605	-0.011194828591674089	-0.011268559105880982	-0.014299105797104694	0.08422064409587815
19.379	0.005338035522102658	0.020726454018228146	0.09731172895558071	0.0021440226886042524	-0.007800571010757373	-0.021981686334289208	-0.013871050823877518	0.09573798383946919
19.378	0.02418969244751068	0.01290458309154463	0.10281409429935451	0.0013480522505808779	-0.006643141954728371	-0.03085707117597103	-0.012080770973617483	0.1037562089582913
19.377	0.028785574283475057	0.006658115632752093	0.1074397945877843	0.001683828603638915	-0.013101088315613296	-0.03668664410299893	-0.014661281420873529	0.09477958068903813
19.376	0.015398582287483364	0.004087789187718016	0.10900054680948124	0.0003336797704971417	-0.013983754135610482	-0.038969636350216774	-0.02047750616376387	0.0758672075693525
19.375	-0.010215991335244645	0.007962760869508756	0.11231736998676833	-0.0010724551606688948	-0.018056128319258846	-0.04250946148667101	-0.02355992696269915	0.048426094554433696
19.374	-0.008715059412606863	0.023197728309735766	0.11606037279872705	-0.0016216096009902259	-0.012855652106720683	-0.05467102081150532	-0.025459937574356495	0.061394759176639724
19.373	-0.026215372471498632	0.010116156851132097	0.11632703845976344	-0.0022953221183437122	-0.014910268721597397	-0.05385293008854575	-0.03351940164233902	0.02916930191091005
19.372	-0.011867828311684647	0.004589371502629724	0.11351228205945585	-0.003773830924300725	-0.01423455547959307	-0.04671892068437078	-0.035706118663814124	0.04150651816213635
19.371	-0.02041280241359278	-0.001298824326246617	0.1111770638529821	-0.004081629425429334	-0.016418824593156245	-0.03972121334126211	-0.03815828149389322	0.029243769753295012
19.37	-0.025011654084439172	-0.002177840944778353	0.1113510523469321	-0.006915250355265634	-0.01649003693608453	-0.031927511326607316	-0.04298028433313128	0.028828758699757095
19.369	-0.05199921348375458	-0.002631615789405295	0.11241448370895046	-0.010381385381358577	-0.021714174465173208	-0.018707910669628625	-0.05163581683696705	0.0069801839196301785
19.368	-0.051040741553293856	-0.0193805705196759	0.11498728432960803	-0.011150269320020278	-0.02107358808116988	-0.019859293542425327	-0.04993263140528281	-0.007517178686977211
19.367	-0.04739098746477399	-0.032006565158898326	0.11754610553091194	-0.013200932354121342	-0.02202480264088358	-0.01974507869797204	-0.053214502856405055	-0.016822260785737342
19.366	-0.04858293107775591	-0.03196246493577792	0.11657480019467581	-0.015008052157011953	-0.021420848774400092	-0.0073714116180951805	-0.052085069227947756	-0.007770908368365248
19.365	-0.04595727772623892	-0.03584069076200702	0.1168816485650277	-0.015470704744897645	-0.022124147721990894	0.0042045289319956325	-0.05004996643163029	0.0016933565418888463
19.364	-0.03550735622668455	-0.03153506786403071	0.11945210933632033	-0.013946447222600966	-0.024114975679111694	0.006035755078793947	-0.04758188085853998	0.020384017422686362
19.363	-0.02963176546590862	-0.02010176704847577	0.11576238185388465	-0.012032260972668851	-0.023426811658247892	0.010221411025038485	-0.048275592798514566	0.040791187733622
19.362	-0.037914197194214516	-0.019609868954440834	0.11703836285616731	-0.011008708015042501	-0.02459600968447173	0.01086520691131998	-0.05101892177881595	0.03477478591931771
19.361	-0.03367496624875166	-0.005336590708798994	0.11724106713443039	-0.009736430644878169	-0.023213650107249073	0.0033076563455400887	-0.048149195003547085	0.04858708577029258
19.36	-0.04026748167239713	-0.005015925818462996	0.11410872399887229	-0.009975944946846838	-0.02559535924874279	0.007423315443081613	-0.050057798022489663	0.040677327755504145
19.359	-0.03158116980570558	0.0033636496266344906	0.10860850520328125	-0.011305205845817845	-0.023830888010277995	0.008366210785826667	-0.04777936003366623	0.053621101953940986
19.358	-0.061165747138388404	0.002231832712881854	0.10154597834978318	-0.013509407648956362	-0.03361395860526084	0.023215776549547762	-0.055005067675558905	0.018704474219607192
19.357	-0.04385346994347383	-0.00799263153223606	0.10247083715867689	-0.015983570313609974	-0.03259283268415647	0.027923563128923412	-0.05311166249887389	0.02997189581412396
19.356	-0.03489914126257965	-0.0059487232143187185	0.10096750674601385	-0.017703819272000487	-0.03240596882808244	0.024684269772289547	-0.0536943958078675	0.0346941239413221
19.355	-0.048550846750758936	0.022399944265989902	0.10191805812877774	-0.017961749084551393	-0.03128750595899188	0.0214761975093003	-0.055905686015400136	0.04799409810976574
19.354	-0.04293202160350429	0.02202378827879059	0.10350608212040235	-0.01635259716127546	-0.031066728557893164	0.014124681064672906	-0.055175411061507695	0.049303204141192936
19.353	-0.04255644459936292	0.03356727715655072	0.10473850892420433	-0.01720483256793237	-0.02978880041910248	0.00781633682281413	-0.05742622223660021	0.056572045317171415
19.352	-0.036534416254767166	0.023295641465217898	0.1033697350570355	-0.019122463103439458	-0.03330811460343952	0.0054105621947897475	-0.05592987381267811	0.04311094475539701
19.351	-0.023314209143385334	0.03188904973282991	0.10274823339345662	-0.01895283262523062	-0.028293639437329432	0.00687401070369642	-0.05076869286572805	0.07095061262403757
19.35	-0.009200858137117685	0.0453319541142454	0.09839022330343816	-0.02032467213866962	-0.025211409510330185	0.005954147878880711	-0.044527044588298814	0.09493938551044678
19.349	-0.010516024398072865	0.04165309039080611	0.09336430498566717	-0.02204662434218907	-0.02647011665078125	0.017897746912461265	-0.039493531885078426	0.09388237689789136
19.348	-0.025484695724689033	0.053068241230505464	0.0892288251883393	-0.02208568965324531	-0.02653295786291565	0.028861866392473345	-0.034980467950465055	0.09705558957046811
19.347	-0.036367146047680876	0.055449326249720876	0.08553379375180103	-0.021306981838432826	-0.02780830035250048	0.03579494614159806	-0.03313820112779364	0.09129563790450579
19.346	-0.024683955065125218	0.06332230362379843	0.0825540626927026	-0.02212931333209589	-0.019810977820778675	0.03820232127725198	-0.024950256108551727	0.11745444137575323
19.345	-0.017670310755701912	0.06379300981774172	0.0792332674429721	-0.02199022257168526	-0.01733673791752377	0.042270229096748047	-0.017746180275290513	0.12829923511255092
19.344	-0.00457628328751003	0.05457640842628564	0.07575709705476541	-0.02327289773598107	-0.014443988620350012	0.054006813378164154	-0.014691589106408998	0.1420471492153741
19.343	-0.007275521772085014	0.04697514097515665	0.07225106101292145	-0.023967776462989754	-0.01881301108475153	0.06392215080289088	-0.01199950047415399	0.13309204347114267
19.342	0.0009982206326872856	0.048311199089836165	0.06831178367679946	-0.024386643363785154	-0.01723548813693565	0.05980526244331141	-0.008431143862772217	0.13580433434191352
19.341	-0.01132096519667325	0.042937775637307496	0.06963169975837591	-0.022942595918370223	-0.018583139112715585	0.0487465282104127	-0.009776439047006313	0.10846930337833705
19.34	-0.013975874153233647	0.04195029054860644	0.07108631722942782	-0.020694388550192677	-0.018052868642507214	0.04117726750807993	-0.009793283173600287	0.10149074394018065
19.339	0.014263848259861156	0.031838675559177965	0.07321933131182767	-0.01764433504335461	-0.012677041507275	0.030541456950683887	-0.004972541702403355	0.11954193553092107
19.338	0.031225820742267096	0.04802499190245335	0.07165566848151705	-0.0151666453283692	-0.00898388687773366	0.027329243458300567	0.0005977423994600883	0.1540851923784352
19.337	0.03464778926153578	0.06138592546283217	0.06700259039262324	-0.014139803096247405	-0.011115239761068096	0.032305677112004716	0.001570641954819152	0.1700869393716804
19.336	0.04726269223120205	0.07315421777179054	0.06294183357682126	-0.011162794538027043	-0.012439667503989504	0.03922474390078978	0.007864810482585582	0.1989810254385871
19.335	0.06489734146237058	0.07246981545900599	0.06015070986577875	-0.010649180562092297	-0.014383744997847003	0.043019460955184385	0.011528087475445759	0.2155044021824004
19.334	0.07098931916253282	0.07519950395122432	0.05818344098109929	-0.010350036832496912	-0.013612359257162865	0.04624329726974796	0.0095353274352874	0.2266531652749446
19.333	0.07920162631495842	0.08725206984060652	0.06116706897386148	-0.009962983420187754	-0.011217143022836495	0.03648951937240863	0.010081735242781775	0.2429301580588108
19.332	0.08134680678824147	0.09585279403443714	0.06614993196965724	-0.009009459503960038	-0.011681048399240446	0.02227213678891271	0.01187973830183342	0.24493116167804807
19.331	0.06397247135809714	0.09796114147357571	0.06579028912574625	-0.008809836157780637	-0.014174846375590633	0.015390119431325289	0.007315445068508453	0.2201293388553731
19.33	0.06583406891382548	0.09271528708039511	0.06511499466766946	-0.010232788846451513	-0.012483019019172481	0.01188616175009205	0.004554544481769618	0.2128347045463581
19.329	0.061946058331567855	0.09353976253688323	0.06537614126553848	-0.011925536726024255	-0.011006243360997203	0.01125121704265375	0.005003512493138906	0.20918139908962186
19.328	0.049504326810711596	0.0935443661324511	0.06927664389996036	-0.011095763315200458	-0.011106543218514453	0.005267881558626897	0.005744953779303508	0.19539091186803503
19.327	0.05518630749632347	0.09468555151330094	0.07378031303277499	-0.007875537036102997	-0.004814579496213334	-0.006016603466687975	0.009582698710018711	0.2049454520433951
19.326	0.043227510099532296	0.08861683818105615	0.07257820509114765	-0.003844581073654041	-0.003465975193634563	-0.0018447069573372943	0.010250304798342214	0.1952672901471102
19.325	0.038982759036039205	0.08021764687898525	0.07243853834439662	-0.0012869255345391295	-0.002789716505963824	-0.0001475037849729688	0.013929346832632916	0.18741479843394515
19.324	0.05408855742574836	0.048412718093277185	0.06942164318865629	-0.0012812017862930958	-0.0027479138707846573	0.00937533277293845	0.020059889935930997	0.17726913582354253
19.323	0.06555915114443422	0.05287077106438076	0.06528889331818899	-0.0016738967970484353	-0.0009498095473743362	0.013281231530095639	0.026157772206937047	0.19437634071267684
19.322	0.05430561306332571	0.038406140548572054	0.06104797142362184	0.00041679031522079413	-0.003969339874463351	0.01750673770306843	0.02692929574166314	0.16771391317934548
19.321	0.05179999065557883	0.03280437885761511	0.060296632618880075	0.0026084574922338177	-0.003427371823946146	0.017887914873126576	0.02876041088831016	0.16197000267348827
19.32	0.043106878200546817	0.01752805291559323	0.06042838702338127	0.004291619317516648	-0.008618680614223884	0.017411040863844818	0.027360532431446316	0.1341472977066589
19.319	0.042216334180605664	0.0032649926920313987	0.06198233659033825	0.00574715356218114	-0.010843131944626272	0.017536220083937515	0.02389732839918235	0.1199039051644677
19.318	0.03481137270471191	0.0038446425232576686	0.06469931889800051	0.00835912947394668	-0.012299793022296335	0.013630055974376276	0.01943849881566795	0.11304472655199671
19.317	0.047111483662248155	0.0009715141981532227	0.06922113563308763	0.010305414452518313	-0.010469054604326011	0.00044952442156542816	0.016730433646444	0.11759001776324673
19.316	0.04519761613384343	0.0021477625594101823	0.07293161676523052	0.011157292624166537	-0.009229640877408407	-0.010648798167562035	0.011498346246515467	0.11155584903768023
19.315	0.03420890400785215	-0.005090546906990845	0.07213045198677293	0.009679943983948114	-0.01125691001875051	-0.00959267097503158	0.003262537956704392	0.09007917207780025
19.314	0.03749497056322948	-0.023941629541486265	0.073913515102908	0.008838043664948003	-0.014939058499684243	-0.01332024693131384	-0.001699901095049583	0.06804559435860114
19.313	0.04307771539052396	-0.02422369848958006	0.07388752544188737	0.010689086835423467	-0.01773868207542595	-0.022534992220026417	-0.004640220473475232	0.06315695488280237
19.312	0.045261789713289424	-0.028169032253487103	0.07307118867708962	0.012032667049710177	-0.017570628555409584	-0.024268375787460883	-0.008161988453338154	0.06035760884373165
19.311	0.04747149978466858	-0.03269634367311092	0.07340639831030771	0.012463142559020035	-0.019098298408560588	-0.021483675091878318	-0.00931314477268419	0.0600627234804465
19.31	0.06011448911291595	-0.019626875510536657	0.06842065225578953	0.01066296623840568	-0.02035933290512304	-0.013184026184197783	-0.007135644522921147	0.08602787300725367
19.309	0.05785225083006562	-0.015290391236459477	0.06648056444958161	0.009930090774779465	-0.021820699652836062	-0.007019102624368223	-0.006433816317636953	0.09013271254076294
19.308	0.03718302554687458	-0.009841309401524612	0.06460702231625781	0.009587375035772894	-0.02857441270813954	-0.0011425638774396063	-0.008000421959102333	0.07181913691180153
19.307	0.03314001847996639	-0.02788003419620111	0.06427302500102972	0.009499406716831693	-0.03156591006833498	0.003740143472171553	-0.00793673686819929	0.05120664940546327
19.306	0.030536395688877782	-0.040190383051873724	0.06899550531937315	0.01090765216289391	-0.02937481160588007	-0.008349473543314723	-0.007832060133178054	0.03252488497007633
19.305	0.0132897580178577	-0.04318926438607473	0.07256839459743691	0.011115848176555865	-0.026140634812259478	-0.023586395247141567	-0.012884213449193105	0.004057706346374701
19.304	-0.0009764541326955367	-0.04696102392047674	0.07785789203472948	0.011718963566833551	-0.024893663440038516	-0.03421460801691101	-0.017018915303761872	-0.01746889390855877
19.303	-0.009329852993634091	-0.05970119872689672	0.08453534921859518	0.010477258509681064	-0.02508728708687169	-0.04197542559304068	-0.01754170233860819	-0.04108115667216694
19.302	-0.024153436914184923	-0.07050432784584615	0.08164580824247647	0.009279262414398914	-0.02754731810431732	-0.03748997372854834	-0.020362809945909	-0.06876998593602135
19.301	-0.02974357655791149	-0.08490340544098718	0.0791672320612209	0.007577853509675769	-0.028737019564779587	-0.03133785898992336	-0.022826636361054753	-0.08797677498270495
19.3	-0.02842724600495483	-0.09754353518187564	0.07924873053453751	0.0065728831481814964	-0.0343683670435766	-0.01351244532827689	-0.018910769193253074	-0.08802997987596495
19.299	-0.044680668527518286	-0.09232500294159696	0.07590844630806615	0.0072725414336147765	-0.039414409358879965	-0.0013961440902345856	-0.019505884150069264	-0.09463523717654887
19.298	-0.04448075980129307	-0.1058709529688251	0.07346466228959514	0.009066140264628153	-0.041567623851597624	-0.004605010243582619	-0.021265724025241184	-0.11399354431107511
19.297	-0.02670789952184549	-0.12078085112712067	0.0733278409135103	0.009562508207170417	-0.04177804741206703	0.001336751979754247	-0.020362518964422982	-0.10503969696059823
19.296	-0.02553563228583844	-0.10894112479625306	0.0705977185227935	0.009466517696490762	-0.044463031159875044	0.005757830428557931	-0.016729676157159368	-0.09311772159412435
19.295	-0.027789189238518475	-0.08759915443803923	0.06905987014370218	0.010376794034304027	-0.04692344309839491	-0.003398408843255929	-0.01511526777294403	-0.08627353144020233
19.294	-0.05020663481456378	-0.09189518016248766	0.06793177419602969	0.01072523990971419	-0.05170107017995029	0.004658496622298891	-0.02065341765581241	-0.11048737442895895
19.293	-0.04390115067459188	-0.07079011331134577	0.06835286165138932	0.010322633658672586	-0.04875957265549946	0.002631291428351723	-0.02086474722417453	-0.08214404990302349
19.292	-0.05908332203785083	-0.07289514682450804	0.07301700082574758	0.011851446652062947	-0.05020962961672559	0.0003407505633914454	-0.025142927415350513	-0.09697890043788249
19.291	-0.027610661066256093	-0.07060279007569736	0.07557543540375633	0.01051491560229767	-0.046801572261967905	-0.0025485460758130074	-0.01830825740111841	-0.06147321847368037
19.29	-0.020726278229352246	-0.056041492206702515	0.07123842756459542	0.008189563942009315	-0.045612158270198044	0.0068692584280496405	-0.014256628362799617	-0.03608267877159843
19.289	-0.019491976018112034	-0.04761726424799839	0.06872009556017744	0.005843878004938574	-0.0427094878413925	0.012898728869684462	-0.011440038281650189	-0.02235602567270245
19.288	-0.029116384626247438	-0.04870061393582503	0.06697147628334399	0.005600842145022433	-0.04497129901959607	0.01924949892794192	-0.01144694764295906	-0.030966480225360193
19.287	-0.009033748265210306	-0.05630044437793469	0.06408810928163877	0.005927580496472018	-0.04494112799636518	0.013711335585677276	-0.008817154265766902	-0.02654829527572211
19.286	-0.024028377294444958	-0.07444909763059915	0.06088342838808192	0.006548848939407215	-0.05009332334903682	0.022683275814133097	-0.008879005820684682	-0.0584552451324587
19.285	-0.029459309711618253	-0.08134012394846835	0.0553889005335515	0.004221980499092837	-0.05275904014980082	0.03736131812357346	-0.004529671688849213	-0.06658627465366962
19.284	-0.07160041663991201	-0.06626549372109736	0.05213996979304003	0.0034106234792261603	-0.056223858058761955	0.056353058935053824	-0.01053731005054015	-0.08218611621245131
19.283	-0.09200280715599529	-0.05722957105826332	0.04621843478396226	0.0025431771736013076	-0.05789988405355562	0.0721101428230062	-0.01437851527615841	-0.08626050748724445
19.282	-0.09933671382714859	-0.05559143712335768	0.04101428589755951	-0.000805547034968157	-0.055078863343229756	0.08146564344396179	-0.016167562717098072	-0.08833263198718289
19.281	-0.10680966321320184	-0.05852682118576169	0.037998557676908185	-0.003710991172466649	-0.05623824641560482	0.08460083470345836	-0.016151688906941963	-0.10268632960666846
19.28	-0.08956811645083107	-0.06893423821491851	0.037767179809208073	-0.005182697076252296	-0.054956634918160496	0.091116393029405	-0.012980804161547788	-0.0897581138215493
19.279	-0.09211289437972692	-0.0787490427112747	0.039426858999680015	-0.0045641921369554694	-0.05355516648410674	0.08900913872520544	-0.011975760845110095	-0.10054529798717837
19.278	-0.09078663096051098	-0.07083738992968591	0.039017581401243895	-0.0042930260106262	-0.05053764771163749	0.09302691187231993	-0.011006378636259306	-0.08441020133889676
19.277	-0.09161270547554157	-0.06591064385601353	0.03740915457992244	-0.004427474566517375	-0.04853045362198927	0.09879540842177104	-0.010438598999482629	-0.07427671451836826
19.276	-0.11523001869940952	-0.064543227624827	0.034996199899844704	-0.00511704439714844	-0.05096257266058668	0.11118453649141724	-0.0160924204337487	-0.0896721269907097
19.275	-0.1098575903773833	-0.07452019957144529	0.03061172947349977	-0.006202770367791821	-0.051698584927305724	0.12087794848189493	-0.016260202261729084	-0.09078946728853143
19.274	-0.12286792601040553	-0.07335145690273492	0.024936340402049062	-0.006693714852332278	-0.057521354603751185	0.1394167311317247	-0.018358754962893187	-0.09608138083545015
19.273	-0.10962476730983273	-0.0728840119703209	0.024878850487410453	-0.0037268598947735043	-0.05715746485558881	0.1369358757267909	-0.014614314338402323	-0.0815783778163146
19.272	-0.11116405372725247	-0.070267502891042	0.020416811467745433	-0.0018137935534987548	-0.05947435412367774	0.14018174368670167	-0.014806432967034766	-0.08212114914102386
19.271	-0.1008384836312981	-0.07247488475556008	0.02116740269106554	0.0004371584601559064	-0.05902340790100169	0.1369884512579036	-0.015595499637076848	-0.07374376387873482
19.27	-0.09872753863402561	-0.07765843669942818	0.020213893541367156	0.0033522429659749164	-0.06043493911067177	0.13262275299603754	-0.01414748287717682	-0.08063202494074595
19.269	-0.07428195061606857	-0.07785483807099869	0.020176732491500537	0.005657306594815559	-0.05055778916893683	0.10616186756016699	-0.008682301852659613	-0.070698671209521
19.268	-0.06460492324575551	-0.08372653209895553	0.02225106179609515	0.007888100451673097	-0.0458769973660873	0.09864540672904454	-0.0046333127979902855	-0.06542388373398556
19.267	-0.05805112026537884	-0.08002483476707134	0.023453141863302385	0.010570625688152369	-0.046032407523211916	0.0969997659771904	-0.0016752670135566916	-0.053084829027016944
19.266	-0.07014666743612441	-0.0612601376170927	0.025986521076723612	0.012973538310696142	-0.045555068140779476	0.08726473112611455	-9.778450453712395e-05	-0.05073708268046229
19.265	-0.0737749685923772	-0.06895488917233639	0.023828846858744868	0.01212727749090714	-0.04318844269571542	0.08864234482176059	0.0009530881086954324	-0.06131983128901641
19.264	-0.06607100612594508	-0.079573650907248	0.023784729570270002	0.00867724263447478	-0.04329215181348811	0.09561085834633687	0.001437151320262231	-0.06086397829559953
19.263	-0.05102666266204636	-0.0780618430835105	0.022696580435815683	0.004978122638063631	-0.04028687651551888	0.09695798149307677	0.0062546767880489185	-0.04474269769411965
19.262	-0.06084884981853289	-0.07843431999785455	0.020316494846900568	0.0014293025502141177	-0.04021765993728099	0.09922322636044267	0.0008388745248630869	-0.058531805996111075
19.261	-0.057920741228036476	-0.0782768704608321	0.013494956155258642	-0.003899493577238289	-0.044280293610960086	0.11307565346018933	-0.00011535954875530052	-0.057806789261618974
19.26	-0.06971017307607763	-0.07576737063544492	0.015313021197432164	-0.00562982473755369	-0.044792487545345594	0.11239261593727168	-0.007741693614426559	-0.06819421885971799
19.259	-0.07545995293951968	-0.09105325367625383	0.02275884886453028	-0.004608691150501443	-0.04559451502521128	0.10651948492784857	-0.014079683414029986	-0.08743807899910738
19.258	-0.06345823549442997	-0.08086187983370063	0.02897186367206217	-0.004598069326529952	-0.044638078959954974	0.1006516717415602	-0.0184238471362681	-0.06393272820099316
19.257	-0.05142961760471643	-0.06275665739205571	0.036282585604808126	-0.004556512996757078	-0.03828102282965595	0.08538387036443584	-0.018759349028531602	-0.0353573548539412
19.256	-0.0765028722918526	-0.05416644075447152	0.037156344785262974	-0.005994220095033143	-0.03766951647160521	0.09154420575928501	-0.025548334685016272	-0.04563249906841449
19.255	-0.05893673758418405	-0.04892568640814332	0.037307374989203446	-0.007291819805457678	-0.03401062833790114	0.08660258797432885	-0.025794908257696036	-0.025254909172153894
19.254	-0.037206950575779274	-0.04327265563939342	0.04141706659334243	-0.0042519530879268075	-0.029780991642494925	0.07518723008655659	-0.024489802068936584	0.0020917457343045953
19.253	-0.013339810250079687	-0.04809488394048245	0.044076613759912675	0.0012598271130306316	-0.028306973773392308	0.053680105307106096	-0.017227880689667963	0.009274878216094962
19.252	-0.0021720498451971437	-0.04197742788338488	0.04789910302551803	0.005030227992434355	-0.024454772753201404	0.03736161317702891	-0.015170238311054796	0.02168669371319787
19.251	0.001967307353623049	-0.04737562621122837	0.052642931120890246	0.007843452530555517	-0.026673651111151386	0.028625697668783978	-0.012169976465874477	0.017030111351473032
19.25	0.010490809845551397	-0.05191160196549216	0.05390442644538407	0.00969693765226154	-0.022231854006863117	0.02491866422634459	-0.010643592512209032	0.024867382197186316
19.249	-0.012430735477959587	-0.03932870144166767	0.05364429402410309	0.011027305282190092	-0.021059566450902345	0.021111607234361784	-0.015040573671662116	0.012964203170125366
19.248	-0.03576502160422734	-0.034032371212428636	0.056875621924525	0.01275011140934712	-0.02156355974054236	0.02059640114363681	-0.020063108715691058	-0.0011388180796894076
19.247	-0.03949975760775715	-0.042039229951163826	0.05997190200751046	0.013645664083637321	-0.023866541333608104	0.018447522316587417	-0.023602186424295013	-0.01334044048479388
19.246	-0.03790229668789635	-0.05027449234862402	0.06389091441180916	0.0142166492177358	-0.023235937628252934	0.013670934380585642	-0.021201872089522844	-0.019634228654642705
19.245	-0.02972616441702325	-0.043017502156689424	0.07057038945802763	0.014984568775720852	-0.019180878869838658	-0.0032847044881325616	-0.019395434666151345	-0.009654291697935413
19.244	-0.040754400253269374	-0.031273027654583174	0.07381106638636581	0.014382481163295324	-0.019458226483632934	-0.005248858511002652	-0.022261383386085853	-0.008540965352827001
19.243	-0.026587181885677325	-0.04252272156544201	0.07764991200349147	0.013345936728905272	-0.01515474802837602	-0.015103152045056412	-0.020634987811043004	-0.008371954792155023
19.242	-0.03356725200856925	-0.040927554476709815	0.07648115066581074	0.0096613093062059	-0.014646822753013211	-0.012349187657568983	-0.023964662920116453	-0.01534835692384462
19.241	-0.02951960920298191	-0.031408263815288606	0.07912480451099402	0.008905224639737419	-0.011187133548435035	-0.023990749039218606	-0.02448788896071541	-0.008075726455192722
19.24	-0.019232203924953062	-0.032306262636542904	0.07999449224861532	0.00883742290595535	-0.007976443115479626	-0.03827003132081508	-0.02015126646668186	-0.008953025843219997
19.239	-0.0090515561657174	-0.023144170081377702	0.0828192276042925	0.008833009384395574	-0.0028318222878924715	-0.04499789576473123	-0.019641386455190535	0.011626792688969267
19.238	-0.025753435835321525	-0.017675089078052153	0.08124038274520196	0.006384344251784135	-0.0030806178375906157	-0.03986609643346739	-0.026108896993132902	0.0012494878125544062
19.237	-0.025422719154681417	-0.02272761101817089	0.08049655490344954	0.0028702367028854425	-0.0025254525235141045	-0.03736662537559976	-0.02995694338123922	-0.004675616465631194
19.236	-0.028251393061730745	-0.011894389871300426	0.08053570802922305	-0.000406308162227198	0.001714008129552802	-0.0377226676243998	-0.03174538821000983	0.003974957439117688
19.235	-0.02746870876539642	-0.020974165015657853	0.07959187461678763	-0.002774252476587691	0.0044743132551881	-0.04168422657250215	-0.035582482950944794	-0.008835164958168384
19.234	-0.022850081274291334	-0.03303158994023914	0.0867722510489175	-0.0007011712193687458	0.004073043874380566	-0.056005378724746535	-0.03888395532031108	-0.02174292623534768
19.233	-0.03683798204396993	-0.03571539213936514	0.09121775773077978	0.0019003074146421994	0.006317119930198345	-0.06156248802597908	-0.04584714477837526	-0.03468067713369383
19.232	-0.025176639359538733	-0.02954362515364739	0.09605844266165597	0.0065223696424281385	0.008388529692746616	-0.07784980130820607	-0.04603074152866782	-0.021600723824561463
19.231	-0.019066181229527857	-0.030659459272595058	0.1010925041903139	0.011274031077742386	0.008499536542668551	-0.08699480930321712	-0.04204597433366519	-0.0158543779946152
19.23	-0.013091476776892819	-0.033270737541821305	0.10480751037613523	0.01584007204635096	0.013002368555194543	-0.10458391835205738	-0.03988807457303878	-0.017296181693090773
19.229	-0.009270409121773682	-0.028654732464674204	0.10261296172976131	0.018831140307208116	0.018406982465050348	-0.11217322336996993	-0.03272532694067998	-0.010247280454398044
19.228	-0.016443455641587335	-0.013927922165325235	0.09650763519352878	0.020238618922062912	0.018386154124525156	-0.11071612029111932	-0.0299317887497228	-0.005955089857915041
19.227	-0.025307459667949672	-0.023920426091860847	0.08910969585472817	0.020823341554645936	0.017517946260331207	-0.11088938370465762	-0.026776665181974302	-0.03266628579476283
19.226	-0.024753840193158183	-0.031634703840280665	0.08610699125235222	0.020540911093876346	0.017049881220189356	-0.10970478541265383	-0.025292449325013067	-0.042395545879674756
19.225	-0.013650430707559558	-0.032226484676558975	0.08623261567121787	0.021125510183505725	0.020303276690984973	-0.10944059552562724	-0.020282728289692464	-0.027656108364037202
19.224	-0.017012093208246704	-0.022232869701559466	0.08861473025640354	0.019582845213679256	0.020168948507621742	-0.1085098480433917	-0.019506688119593996	-0.01938828697549333
19.223	-0.02809585021693728	-0.021808164796927265	0.08716002669772926	0.0172733359842967	0.01735607109315307	-0.10793288208652907	-0.02066342435312052	-0.03604746332521458
19.222	-0.03336657251725139	-0.020484300704112002	0.08894345987479024	0.014162887817778191	0.016761835473500852	-0.10588814157796733	-0.025933105672810264	-0.03987083163326144
19.221	-0.027226955528162122	-0.02969066519567143	0.0900172590958439	0.012361610417718438	0.015777357568567574	-0.10483746737182997	-0.026609145291232927	-0.04359886101353361
19.22	-0.02154568373161858	-0.023687162469443912	0.09007106945513854	0.011894612679201444	0.02131352538499165	-0.1039680731357997	-0.02742718719107362	-0.025921711817530557
19.219	-0.02165792444630732	-0.01971909592271004	0.09033125945858878	0.01293780190619298	0.019655570495375585	-0.10325497352157775	-0.02514023659856246	-0.02170736203043777
19.218	-0.010101317086867567	-0.02117785548677542	0.09241738250612741	0.012442315815135885	0.01928289308372122	-0.10703646284560975	-0.022855945474423933	-0.014173044014268221
19.217	0.011339384318220347	-0.01951908671419833	0.09238910345259921	0.010093996463445443	0.021863520570627237	-0.10666478266751689	-0.01941454066737336	0.009502135423177016
19.216	0.024790319034800667	-0.02447505552064211	0.0894450408531613	0.007480742183549438	0.025190475354503583	-0.1151635824328121	-0.01779591085953225	0.007267939472560769
19.215	0.039018341070852	-0.02870631745347474	0.08589383755894975	0.003687921843022579	0.02712611868471626	-0.11984802688343166	-0.021193257105368346	0.007171874820634194
19.214	0.04721106617020521	-0.02654370709869447	0.08085225563652543	0.0017077853669569265	0.02800118585562572	-0.12141185568162527	-0.020746432185976715	0.009816730248993544
19.213	0.05103993781069516	-0.02916289651469217	0.07851589605534404	-0.0010087999627481636	0.029128201230986583	-0.11651446894137063	-0.02097734947497898	0.011997869678214812
19.212	0.04757142069910181	-0.020064263308923636	0.07575550887714666	-0.0035093534397585557	0.029734619151946085	-0.1081392609365297	-0.019970276369639883	0.02134867104298266
19.211	0.04844134979607073	-0.019120140058002555	0.07280782120114715	-0.004739081262718159	0.027905984488089786	-0.0989248892316148	-0.017850056920335255	0.026371044932972154
19.21	0.04539502706039045	-0.029505584708692467	0.07015612123631865	-0.005986553896542013	0.02141224765358274	-0.0844943856331124	-0.016734678777114098	0.016976871711944952
19.209	0.03498711536621446	-0.0317828024832858	0.0697022397211704	-0.00771984487161248	0.022129137190701087	-0.07486408778706455	-0.017860605891685033	0.01245175713612312
19.208	0.016944520925753714	-0.02955409398000075	0.06744565477280862	-0.009291660363518695	0.02095322027506441	-0.07006741930549065	-0.018939478728809966	-0.0035697776753833566
19.207	0.020341658144411134	-0.03511635684557746	0.0674570582999019	-0.005399619243493525	0.019416261161770976	-0.07126648047780115	-0.017024826564679962	-0.004567478960788129
19.206	0.028364268008333582	-0.029787312725787274	0.06941843391968572	-0.0006567425312633546	0.017867369885887108	-0.07752675397720665	-0.014402460095565672	0.0076792625796491265
19.205	0.033153518103839374	-0.03589311640808024	0.07258201220573479	0.0025797149350959003	0.018677705388929766	-0.0858969095252462	-0.010303201040628096	0.0052029247002733925
19.204	0.02940068762331105	-0.03215764461995363	0.06882594822864796	0.0026505473756834874	0.01808194731952195	-0.0811266441059404	-0.00936750873765746	0.005674841821270427
19.203	0.01962704376065716	-0.012280523912286512	0.06507871014364497	0.0015715332639283375	0.016756282930159294	-0.07443644146849415	-0.011030094429291815	0.016316604717609096
19.202	0.033100991942141	-0.015766765884107414	0.06323558407947516	0.0016542439973248335	0.016487607857102127	-0.08006525067295822	-0.005806319907413204	0.018646411318977485
19.201	0.010460098156368502	-0.02818548226557116	0.0597588898948489	0.00025256105071402857	0.012994068177643925	-0.06759613920672347	-0.011114145713830403	-0.012316004192719276
19.2	0.017143644318323048	-0.03252858964092287	0.05861156532744971	0.0014358430346019802	0.01383032927086525	-0.07253449315755134	-0.010010739223709209	-0.014041700847234218
19.199	0.0074977576084682696	-0.03631034659938592	0.0579462772831949	0.0028972771960580346	0.01295677053560862	-0.07037905014392898	-0.00983013884989159	-0.025391314119985076
19.198	-0.005432023004942721	-0.04144499588280226	0.06103887244821138	0.0035357018525434825	0.007081058601547063	-0.06447652498231449	-0.012634179630800269	-0.039697910967757544
19.197	0.015307980665621557	-0.0491332118039276	0.06502058914275288	0.002955797759563339	0.012089518136972899	-0.06918981301745841	-0.010583049787603827	-0.022949139116475337
19.196	0.0138239308068977	-0.053517181299150174	0.06783527229218844	0.0020961570260604745	0.013679645448947397	-0.06471928002391802	-0.009033469152345042	-0.020801455748974185
19.195	0.0149867236007859	-0.05175622130655366	0.06356477746299838	0.0013395476753883528	0.0114954425311673	-0.052838509591458305	-0.006476545216426821	-0.013208239627672036
19.194	0.020644370522107103	-0.050603382829280896	0.0613289614790391	0.00016617215645720051	0.01143485746922046	-0.046561839226784585	-0.005581388181651548	-0.0035908604292416157
19.193	0.01888615778187841	-0.06044062385517712	0.05395956120404577	-0.00021681719448540804	0.008120227218062936	-0.03204005651571329	-0.005747717014933151	-0.011731551361388703
19.192	0.02487285126209482	-0.05815911069822022	0.05174668571585528	0.001796130187438294	0.011113814068798966	-0.024075512149358325	-0.0031544834979149172	0.007294858386608816
19.191	0.012725283930620002	-0.07586799357625029	0.050601369057139856	0.0027556919529700963	0.00940252483266324	-0.008646796665960466	-0.0031892531393591383	-0.009029920468817565
19.19	-0.0007646924394588694	-0.08097655311922569	0.04583974088536191	0.003878486150117766	0.010851036289101224	-0.00043320427362925074	0.00046172727405391356	-0.02160518650773291
19.189	-0.028992801164390514	-0.07184331801871302	0.041959491750184874	0.006547253342573889	0.0075438154969278415	0.008690163690457275	-0.0026091541938217944	-0.036095394902959654
19.188	-0.021274200421367517	-0.07039101908173606	0.040080440488448055	0.007271551570175561	0.00924752942005469	0.0069039901250258495	-0.004574462001039059	-0.028161707899399424
19.187	-0.02968436671898189	-0.07533032479676383	0.03471870025829116	0.007783453483551028	0.010170591465509915	0.015472921451141985	-0.003931917899191006	-0.03686902485725163
19.186	-0.032441229378707526	-0.07585161309252708	0.031072188392258226	0.007961070010319204	0.012281607986508014	0.02358745755147673	-0.003058244065078597	-0.03339051853067243
19.185	-0.03691968497373477	-0.07308747854285791	0.02830066642721807	0.0068214824776156036	0.011153399576476986	0.04148597049461333	0.0004353139540524964	-0.022245644540668685
19.184	-0.027854018073745657	-0.05530505861663215	0.025950380311538623	0.007434017460359321	0.01287117990163722	0.04250287263917141	0.008720011624045121	0.005599373622328763
19.183	-0.024854106610975535	-0.0708224693590962	0.024114397322562375	0.006342143202222594	0.011505024924460372	0.058201061601060644	0.012535211800485335	0.004486051080234255
19.182	-0.023197117715437088	-0.07933943151191514	0.0222189393649046	0.007611821286408471	0.011025191527568978	0.060409725390663915	0.014179327905278427	-0.0012708716578062607
19.181	-0.017497948137770614	-0.07497499161739718	0.02012886870729602	0.01011832375464028	0.008099846376086184	0.056973102719802604	0.013829147905688899	0.0028472018026572954
19.18	-0.01985725618969436	-0.08075380569024837	0.020649094822837277	0.01154508518840025	0.008525848767116706	0.05318660210414894	0.010107160526665382	-0.006704430997439559
19.179	-0.009775457612147598	-0.08645726321607583	0.018878275149890378	0.012803319348156705	0.013373418370403733	0.04850990120619869	0.012260004190358664	-0.0026678067535739203
19.178	-0.0006308156541425802	-0.09051516684201122	0.016950707215587002	0.014031589642848452	0.01192433167463669	0.05465468037896759	0.013005261020687442	0.006415326415885936
19.177	0.008504881378912366	-0.09822371207602565	0.01662003135658985	0.013914843128302046	0.011801024874562138	0.059961236867835055	0.014542531512021561	0.012578305530175804
19.176	0.006001282301021149	-0.09557495140751016	0.01783749163210313	0.012015827216196762	0.014140834922537593	0.06953025049163486	0.015517778170499597	0.023950735155983338
19.175	-0.007750396086263045	-0.09708420479399305	0.018817214503075164	0.009912457675367747	0.015745290687029012	0.06915939308236574	0.015161029492037237	0.008799755067581572
19.174	-0.005580701994114534	-0.09978812351355071	0.0175392448274847	0.008156260614979871	0.015409020493222236	0.07585400853562163	0.014934065968696508	0.011589708963643197
19.173	0.0006857079338669081	-0.10337176160111472	0.018891320672040912	0.008506689360336495	0.01688535706251848	0.07640608097183854	0.01870482749746838	0.018003394399486616
19.172	0.010974069056877589	-0.11659690330497963	0.01719106497598677	0.008238551606628342	0.01682064267293626	0.08452958777536335	0.021033347293275995	0.02115701278281268
19.171	0.017421187476546862	-0.10515879621325919	0.019581059060062245	0.007507920828580872	0.01868880541263085	0.0851723915197411	0.0269896817129327	0.04321256808430274
19.17	0.025900519639948882	-0.0998391224775741	0.02552725937013811	0.008131440462708639	0.02270917900721603	0.07983929114550481	0.032735263096072664	0.06226856714794238
19.169	0.03176494982149958	-0.09592444928991561	0.028684018753679652	0.01025208403236988	0.022943838093986813	0.07720098451580171	0.03581491768476219	0.07492142592742201
19.168	0.034423781818289534	-0.0850833309649861	0.03277931638159792	0.011715903088590274	0.024247054646885147	0.07129880818260936	0.030853931874569085	0.08938153315298614
19.167	0.04284187714054255	-0.08768533002208212	0.03480480790201934	0.011593197073423767	0.022477179439911232	0.0662421224615759	0.02650857689603381	0.09027385399539067
19.166	0.03168052344478678	-0.096340892146908	0.0354324691785477	0.012602209499861239	0.018287261192999615	0.06490514617926824	0.024440363098439555	0.06656671734855557
19.165	0.04132877009451086	-0.08911927550494347	0.035130079161686645	0.013871542962041516	0.01982508196440147	0.05667769240282894	0.02604630021428811	0.07771389108052595
19.164	0.027115368024187347	-0.08789820138875193	0.03684381223756805	0.014337728259856242	0.02136632898589852	0.050426687229280454	0.021207447882618524	0.062191723348038686
19.163	0.025415108541984033	-0.06994835833996671	0.03955680245697124	0.01474303400030319	0.022559335786963786	0.03437325712563055	0.018342590271954506	0.06669917957188609
19.162	0.004278939014159988	-0.06281706624520123	0.04382952750728997	0.0151544653819764	0.023416072858390535	0.023027940522565515	0.010723417851155048	0.04688987903918118
19.161	0.0019398034491073801	-0.05431514328454856	0.047994190789028224	0.014862485821725002	0.023231219871705733	0.010436463717066857	0.006129387272987508	0.044149020364084635
19.16	0.029438089874322948	-0.04018909758339184	0.05072436053560114	0.014937834544804574	0.02803326669242967	-0.007534836341772433	0.010363268905265954	0.07540961772199406
19.159	0.034785088254403185	-0.028941572668081506	0.055913906662848234	0.014803045150758365	0.0272346402048127	-0.017976189968531564	0.010530265433477126	0.08581891763620941
19.158	0.07160843303343167	-0.04039050362974006	0.06079384702965207	0.012026683333044907	0.029272925466811373	-0.027966076787123484	0.018696882814285942	0.10534530844607648
19.157	0.06614292887345474	-0.033619280987300826	0.06782783801556924	0.011709447398813744	0.03106679075864438	-0.035085137972892255	0.022370546405618974	0.10804258608628903
19.156	0.05744070744215346	-0.032224693782223035	0.07071765829189136	0.010925523953547511	0.026287883476969753	-0.039044329852830906	0.020081449859543632	0.09410274952950815
19.155	0.04956299445340573	-0.03579533935482537	0.07284762348199791	0.012380288817900542	0.021873513130175937	-0.047011210879779775	0.017966358745462152	0.07385786964887497
19.154	0.03756280280415325	-0.0456269780315921	0.07619660889503521	0.01594063052389849	0.019341080964239588	-0.06051166875393843	0.013147763402214352	0.04290247640179601
19.153	0.025947684987485786	-0.06529546154829902	0.0799253200274439	0.017817048003502478	0.019494303218452025	-0.06058623647242811	0.004893087699276322	0.017302658216157063
19.152	0.03381702567098799	-0.05767928423250979	0.08270243365015872	0.021882413417648294	0.02135328861801522	-0.0733322087759749	0.001852457326023682	0.028743668348325535
19.151	0.04352635545814021	-0.03913424322767778	0.08121790390721717	0.024356954920947693	0.02574266071320963	-0.08290726694071182	0.006763869839446102	0.052802364831125104
19.15	0.043452185023108214	-0.04141579048601951	0.0845759734861824	0.02730596120676232	0.029667297935491277	-0.09391411357481871	0.007989220934874197	0.049671513590705985
19.149	0.04501577237596521	-0.04231415385860249	0.08763263848593805	0.027861600391822172	0.029421484586783286	-0.09408989403214463	0.011543963164270643	0.05352744794976161
19.148	0.04904769332770886	-0.03823393843588363	0.09181497919127057	0.028830608127746515	0.016556277553167575	-0.08869053748739564	0.012920137151646749	0.05932508227661426
19.147	0.03891955533924296	-0.03752602223436963	0.09402862556161296	0.030559962911928196	0.01524738221869626	-0.09241868224168925	0.011125120071000971	0.04881082155542149
19.146	0.03400600545428478	-0.026102376463068566	0.09482783571926579	0.033164511019862175	0.015401877796665353	-0.09993268545952727	0.009451581862957248	0.05136516806748226
19.145	0.0405994004377801	-0.023141489729528786	0.09393285379794136	0.03403206527349578	0.009008493025671527	-0.10108720269724447	0.008334603664766682	0.05334412010811551
19.144	0.05080306755337638	-0.02271395780491936	0.09142288380610708	0.03472776418910861	0.00790340756812391	-0.09531981540135437	0.008407640335668098	0.06682334991044225
19.143	0.048498304585671725	-0.012281040141620458	0.08711683204052889	0.03635917939249467	0.006662497133595124	-0.09250839111996623	0.009104778855722806	0.07384738189070372
19.142	0.039321327085955815	-0.009640849618392622	0.087256560471757	0.03660629849907693	0.00048067049039701715	-0.08820710882252492	0.0059984053205379695	0.06581689810626923
19.141	0.031954872949564894	-0.0013872132310623897	0.08574710194263879	0.037664444461356084	-8.636837657061136e-05	-0.08757290244076188	0.0031595332396516795	0.06631993530516489
19.14	0.020267931512938375	-0.01275982983923818	0.08523084451868712	0.039669926295343494	-0.0029836329284043117	-0.08862156158593049	-0.002516206117800124	0.04080367797339601
19.139	0.03997405239803076	-0.007380758206547711	0.08432238263572245	0.04104164687545886	-0.0024493964090970266	-0.09038536267067965	0.000440105225504972	0.06512256462288768
19.138	0.0331587381213474	-0.010703566693398336	0.08419546441447512	0.03947079376296525	-0.003954094514205586	-0.08333421861430601	-0.0006973152656755133	0.058833116476877834
19.137	0.04523627199971081	-0.011422437280371511	0.08024897913626461	0.03794880813391632	-0.0011089023599311076	-0.0786629368749896	0.0044817153606668825	0.07223978275459952
19.136	0.03595077387868173	-0.01756300726098825	0.0752121563134347	0.03711112101147229	-0.00155450395864154	-0.06460501018900544	0.0069173903515498125	0.06455152979495349
19.135	0.040748655662749655	-0.010210453700151056	0.07494219352118225	0.039214349940147386	0.0016064132054109947	-0.06530477096134302	0.007635802038807427	0.08099638766799622
19.134	0.028246554125135326	-0.004893476162324717	0.07377148654127907	0.042030465527576055	-0.001159262264398997	-0.06593275126319131	0.005398713245424069	0.07206301650407543
19.133	0.04022133776140624	-0.006106404941365717	0.07394576859741253	0.04596246631554202	-0.001958766243546073	-0.07269388257993636	0.008319664712318264	0.07937051890951263
19.132	0.04156507969569656	-0.01897981995771314	0.07029370551504766	0.047918099939249004	-0.0034161385326250127	-0.07168732308999726	0.00980118039674771	0.06569360356965781
19.131	0.041878356429660535	-0.010087383788574655	0.06635033929538636	0.0508204115274582	-0.0035639190782523755	-0.06756930061288458	0.009797364062553271	0.07782850377279349
19.13	0.03303648188373742	-0.01879441715698693	0.061485530415210654	0.05203980572137734	-0.005411255713216434	-0.06677417727867407	0.009118081059262373	0.05558196787144798
19.129	0.024820371653730966	-0.018642257752875757	0.05897194085698665	0.05422572415529281	-0.006676761724915714	-0.06785718908866212	0.0053542056751414435	0.044841828099556835
19.128	0.029175355850558304	-0.01866175692094174	0.05933467741066156	0.05464673029936318	-0.006228937531452594	-0.07236507865672781	0.0016643849067436989	0.0459009904514609
19.127	0.0254358189908217	-0.013599772885988237	0.05794478506435219	0.05519365819177313	-0.0050782438638057315	-0.07721650105801903	-0.0003189434644195188	0.042679744439134026
19.126	0.021201096396872288	-0.014128071218793892	0.05367234558918188	0.053784243392999365	-0.007016659747563381	-0.069689324046883	-0.004253405514824671	0.037823630365813266
19.125	0.03970760044184907	-0.012102336946187897	0.05037664770028272	0.05340074519149063	-0.003721956691726369	-0.06960449939892843	-0.0017307940208803885	0.058056200296779714
19.124	0.050040924314600055	-0.017632091719122833	0.04908656703194758	0.052399368611260044	-0.002132682050809187	-0.0688547966279156	-0.000735263780159201	0.06290728955996006
19.123	0.05855091403489876	-0.010346678976708823	0.04749392310201639	0.05138361157082727	0.00130202757687492	-0.07000129081347861	0.0027986028750062175	0.0783825064944299
19.122	0.05013631939948748	0.0025460358505968728	0.04604703464174875	0.052984746960659024	0.00025861431430218573	-0.07115111289408027	0.0061850230506701465	0.08082163827271405
19.121	0.04327719931967078	-0.006287571534209668	0.042490659029157385	0.05319330334832184	-0.0009680176076365399	-0.07231574478040947	0.008783052001335001	0.05938982777489432
19.12	0.04084149522076519	-0.009078795981867671	0.044304014985213414	0.05583251548522572	-0.0021077812233096793	-0.07462621760054589	0.005633221917872078	0.05516523088548109
19.119	0.04307634864599752	-0.0040977402825657094	0.043559510890536224	0.05667280195270674	-0.0011740806454385577	-0.07112383481504381	0.008177653110571725	0.06691300574619241
19.118	0.03419277240766849	0.010494622179789914	0.0445518320403977	0.061017788825358465	0.0020365431116013966	-0.08221260347656134	0.008990791141623156	0.07008095508825463
19.117	0.027440751689728593	0.009563639004738889	0.04329929091660478	0.06457698469827111	0.01714347139400907	-0.1015752145377471	0.008820695681250434	0.06044892316560535
19.116	0.04367484487600137	0.024573806293155087	0.0450275533907627	0.0682464393642519	0.021773768693201134	-0.11727445063199582	0.014748092459987205	0.08602196198537637
19.115	0.05376099159692149	0.02067696706535216	0.04410524508738245	0.06986713357917917	0.024323770797787247	-0.11648366358764406	0.021721472071389414	0.09625044453897846
19.114	0.06813690533403971	0.016237138512217975	0.04748244358319731	0.07246842752529314	0.03380269313757989	-0.1292605214888205	0.02879900929234669	0.10886708660350752
19.113	0.06258075864571566	0.03162101171228926	0.049314336039499196	0.07360807019755633	0.03286363300323103	-0.13156501830872802	0.02704746128187363	0.11842279128956346
19.112	0.08217638717541487	0.024038987990080862	0.05257330928590509	0.07462445887818436	0.03681989682671816	-0.13837574865427182	0.028307276716070362	0.13185729150203152
19.111	0.08433876174736188	0.024271239955254487	0.05137054341878855	0.07423751686884383	0.040828357120585856	-0.13815859876313485	0.02982058366090623	0.13688782034769975
19.11	0.08588694901695337	0.014564773712577583	0.050474896497052946	0.07286084729132813	0.04100418189980548	-0.1368310813628817	0.03082527920642697	0.12796056705483583
19.109	0.09968216010170927	0.012453256123187373	0.04587995881911677	0.07094783122025117	0.04240516536619676	-0.1240536534743013	0.03267974282753272	0.14731471815616004
19.108	0.0956669843534863	0.012239244322429066	0.03800116046765645	0.06845479397513454	0.04305924638337277	-0.11816633484750483	0.028383727978797957	0.1392550946545743
19.107	0.07861395286815487	0.012098936798301985	0.03253493894625681	0.0653625621039211	0.04255423036492356	-0.10651889502468936	0.02322215412857709	0.12464572605686897
19.106	0.08541642485311307	0.01643348411949841	0.028543919600307	0.06240365292636696	0.044444078695344835	-0.1021691782394738	0.02640980286773953	0.13507238195515647
19.105	0.0854659848196313	0.03037332649355573	0.029651386224551324	0.06260632947808631	0.04614472688694704	-0.11200110742227931	0.026463833919285307	0.1422406464804924
19.104	0.08791282204434125	0.030125440530014203	0.025826172929063418	0.0601657346588631	0.04304205388300453	-0.10664250897707994	0.025366226597363095	0.14042971506820656
19.103	0.10219188988645289	0.02542190892990348	0.02424796455743916	0.05788620625446583	0.04147630348712994	-0.10046977242090094	0.02625989994917699	0.15075450069449037
19.102	0.09739067689378356	0.023193785973543157	0.024514149596446266	0.05693866756956556	0.04053641117989315	-0.10310955324490934	0.021766600879902676	0.13946413796832235
19.101	0.08513157794899762	0.029013254205980665	0.026521763616466743	0.05809330912773358	0.03994708645976175	-0.10548480638663094	0.019920934198540685	0.13322218497230942
19.1	0.08988858056277582	0.014754973745809252	0.02923606086777575	0.05758312022057144	0.03971863731973091	-0.11671328321335217	0.02228416335722283	0.114468089503311
19.099	0.09719559017196033	0.02067919258594486	0.03012978078474937	0.05874819786763297	0.04233328852897067	-0.11813380220993963	0.021037543056656283	0.13095224772931857
19.098	0.10634371936097864	0.020869582543345366	0.02545291026903218	0.0587903314682654	0.042949439757695274	-0.11637284920273316	0.02537364142226206	0.1380331341965837
19.097	0.12296822997921719	0.027715182561620644	0.022873782378742824	0.06013740494678732	0.045740753027017966	-0.11174602083264507	0.02894184575476544	0.16768933206074088
19.096	0.11882164673510154	0.03465583166338426	0.02086836163695871	0.06379237770742563	0.04380482842070421	-0.10943027787067994	0.02704686631404485	0.17251276829289441
19.095	0.11374524525646201	0.04527172516301281	0.01710526690198577	0.06557776149419148	0.041651171753932736	-0.10267978837099978	0.026850244467084394	0.18067138219858503
19.094	0.11458481284856781	0.04427039228583851	0.018574017528723452	0.06597937474775684	0.0416810767165563	-0.10278280703617071	0.026600415792187526	0.1823068670912722
19.093	0.11075555668667558	0.04608812868943435	0.016972196159740882	0.06613958118072816	0.038770146610481504	-0.095348069271191	0.025002583172674342	0.18337754005586948
19.092	0.1089582479297766	0.055640725257148915	0.015548010149763591	0.06635406380479214	0.03675485647521093	-0.08811518174581501	0.022639764072665436	0.19514072187087717
19.091	0.10699806328803607	0.05744985315344753	0.014916847214887952	0.06626649118279282	0.03502070309778471	-0.0905884557473371	0.018753168356623995	0.190063502189612
19.09	0.10862753264530767	0.06178454969307001	0.016447259914878387	0.06378183366682855	0.03563601896963409	-0.08695515467548898	0.015450639940326027	0.19932204021422972
19.089	0.09264011793135651	0.06711607225696614	0.016990069344397618	0.06260257575983719	0.033000465066531426	-0.07796529087574822	0.010531325190568985	0.19438400948334067
19.088	0.08272295575022781	0.05241361793182708	0.014137229849533917	0.05878509121952469	0.03029429198432876	-0.07124860395388932	0.005271198348880901	0.16710458278155293
19.087	0.07874837997765383	0.04494515264223331	0.00809706449207237	0.054199876724948304	0.02838544999510173	-0.057355711229415185	-0.001096311809243744	0.15702021260259436
19.086	0.06592283283155265	0.04344721313841049	0.003040964134485513	0.047898622470336605	0.026443695752660368	-0.03877604698654302	-0.005722209063585559	0.1479772813409026
19.085	0.06818841100935469	0.028133785056691174	-0.004078766933702127	0.04223393994775293	0.026002414375447813	-0.0228531065499471	-0.009744238071033529	0.13762667690559738
19.084	0.07347974629248721	0.03325147105372395	-0.004065459939989857	0.03850274094389494	0.026964640866669498	-0.02833834078082642	-0.013486263603737392	0.13979479843595932
19.083	0.04287006300763796	0.03723143372759097	-0.008825591688975898	0.034198442746111724	0.019893170906265745	-0.021599154719844194	-0.023327099377515204	0.1037683639787863
19.082	0.05403761839063925	0.02290044490886256	-0.0121520246471567	0.030549110144733937	0.0222542259241294	-0.02234812979652201	-0.021210269788194402	0.09524124492468644
19.081	0.0504221415397792	0.01723525958991079	-0.012973767333425812	0.02793899197302263	0.022373681148593505	-0.022395049922740995	-0.02179615546575331	0.08260125699513932
19.08	0.04320755457688552	0.016343407948285815	-0.011106956735732254	0.02797598143824409	0.022171417069414723	-0.024664928372072126	-0.021910508149450614	0.07392647592502577
19.079	0.04670364391562831	0.017439162289690557	-0.00768865657128881	0.02778466496400611	0.023987140342159208	-0.03230721752612009	-0.02062014502318288	0.07591873741407529
19.078	0.027709968315296152	0.012948157001821947	-0.008123090670184574	0.02656465109186712	0.024756366504187	-0.04033416607995477	-0.023220399217398935	0.043521886163032875
19.077	0.003061924811418315	0.011779213053216608	-0.008528411979297879	0.025414977436343023	0.023822883785041604	-0.03517458054262512	-0.025815832556812524	0.02037600656409655
19.076	0.014906642670230674	0.0177671487726343	-0.010676354865489124	0.024682470289041802	0.02664135198288342	-0.040607434670365095	-0.024980846134344148	0.03271382417893598
19.075	0.0005277961364695827	0.0021796889640581796	-0.00917510193520954	0.025043094104795216	0.02290326568972123	-0.04142867054528221	-0.028975457219481804	5.007241455246003e-05
19.074	0.00036601537108094107	0.002256777481429495	-0.010341604089081358	0.02469343800158441	0.02410671020645161	-0.03487359051339922	-0.0303521238755593	0.006207746458065877
19.073	-0.01028755320989383	0.006355468345686788	-0.010377152501609643	0.02480680037950389	0.02445038653464593	-0.03254026787275244	-0.03217685882818877	0.0024076816755806973
19.072	-0.005827659750679892	0.003458106340537448	-0.008971541089721313	0.025812753661583976	0.026291857061200297	-0.03875033822626062	-0.033598865736852446	0.0020131779966598984
19.071	-0.017063669868219833	-0.0013842770126988313	-0.009922365824923673	0.023191855036896136	0.02377267193008681	-0.023230094789255418	-0.03445163470784962	-0.004635880528114811
19.07	0.0005758595984826087	-0.010681939721711942	-0.011668742130115817	0.021177286944444873	0.0226597463848055	-0.014962143473262302	-0.031232170584492458	0.007100067602642923
19.069	0.006821517455044557	-0.011962091713368928	-0.01228519952838969	0.01983312233328771	0.02352764922333428	-0.010988874928496983	-0.030946784199596955	0.014946122841410947
19.068	-0.006594992432677138	-0.021876281096124828	-0.013547943991943256	0.017325942530910687	0.021741754747771402	-0.012343261503608538	-0.030456364729290364	-0.01529478174567167
19.067	0.007340164987208908	-0.03137657397709681	-0.013513290169387737	0.015276720048114534	0.025426875412121852	-0.01099877428217333	-0.026517710839998543	-0.007844877981212584
19.066	-0.00417352222419165	-0.03949494513304508	-0.016543302289281137	0.013916089931122144	0.02546679473622948	-0.014216625170860198	-0.024470992203107222	-0.03504551015002644
19.065	-0.01295838530222504	-0.04025710890947831	-0.018539944621760007	0.009813382248258229	0.0271172848413892	-0.004370437443561137	-0.026800742656324594	-0.03919520918737707
19.064	-0.016019234754341305	-0.04576646225977221	-0.01913161064099622	0.008491158615528072	0.030982200313906638	-0.009002727225923657	-0.027075304296531932	-0.050446675951598685
19.063	-0.01604169504549624	-0.044773830277282656	-0.021406915915163083	0.006809722905543936	0.03219395257170099	-0.0035238871273959305	-0.023950226355562876	-0.046742652888092984
19.062	-0.025537425259612334	-0.027133123079318366	-0.02300531462130362	0.00535146738677561	0.03764845924473548	-0.004826034881735275	-0.02265864506817028	-0.03750197121045851
19.061	-0.030807499509916347	-0.03495175583543375	-0.025129412678750462	0.003116050516331903	0.037106164727417124	0.0007383982520376975	-0.021750175314722675	-0.04992805452831384
19.06	-0.017659560159732024	-0.03831885700707627	-0.02500586769161739	0.0025995504566429517	0.03974148324027915	0.0015575923747821463	-0.015134287641920707	-0.03708565878672143
19.059	-0.018321974408988417	-0.03660074631914423	-0.02376891686010385	0.0038316743496285	0.040384330677318836	0.0010489425038286981	-0.00953273984708325	-0.03342669005746046
19.058	-0.007185861426028062	-0.047521203110354016	-0.02431248756090021	0.001741994078479081	0.042175582696057035	-0.003286846825853118	-0.004097783175661007	-0.03838882214859929
19.057	-0.008685235270717406	-0.029812809819566688	-0.022333333550352386	0.002038871935154951	0.04128540787556467	-0.00658724677126532	-0.0009125253318469362	-0.024094345601182177
19.056	-0.00010735106811488038	-0.026229644654572226	-0.019901601421671522	0.0018269944123421311	0.03953137967452225	-0.013048484495621793	0.0005138399678132899	-0.01792870755311604
19.055	0.021620312531810626	-0.021774133014462294	-0.01795367789489255	0.003109458265214471	0.040053596819158876	-0.0254945745550339	0.0025676580599167664	-0.0004390178482047702
19.054	-0.00103504604789606	-0.010806601895771983	-0.015843124075658466	0.004238436751103691	0.03623142572976423	-0.025566273610464485	-6.153912397000028e-05	-0.01278118314892307
19.053	0.002157933924038069	-0.01775859790858547	-0.0179656131082524	0.003577617263930577	0.03351392132787989	-0.016220478460692078	-0.0031522137783941417	-0.01269521696168141
19.052	0.008067977176714258	-0.012384429358645477	-0.01845076271505164	0.005580689993117893	0.034629586086721176	-0.018515435209126352	-0.0027088610367371757	-0.0010723740262701398
19.051	0.004832611469667292	-0.0049209191338590585	-0.018684842845448912	0.008051149821006298	0.03401090510831306	-0.021988126523020846	-0.004241623536525907	0.0013007778966578343
19.05	-0.015675391150643314	0.017670655237012944	-0.020592344583782562	0.01046819791417164	0.03131528435563613	-0.026163226157191133	-0.00706048901314027	-0.002976824384796295
19.049	-0.01582761997654103	0.020835645553333393	-0.02459702034379241	0.01108206281315205	0.030835000015709824	-0.02596336745114325	-0.011829489905975876	-0.003635299389281421
19.048	-0.012847283373484508	0.024799032180860436	-0.029801036674984793	0.010008380315827736	0.03090965942024937	-0.018491325313424234	-0.011326616744307572	0.004577426555044006
19.047	-0.007897185045629307	0.03538757711732465	-0.029594996760542003	0.010892319832868758	0.03237183017909562	-0.011400730109826007	-0.010019366557928677	0.02975881521329171
19.046	0.016139191596432845	0.04741621579293476	-0.02414790237791209	0.013608794667192115	0.03669812979442	-0.024141480977140972	-0.004887958694062888	0.06557294849592665
19.045	-0.005858662293220185	0.045545042492380894	-0.0179420637663803	0.015449931280697271	0.0331209506668273	-0.023788963549041142	-0.008729122429112834	0.046526234831263835
19.044	0.00861782754182272	0.059243473501362054	-0.013155387729367973	0.01972384944837735	0.0360451230517711	-0.03660180313480588	-0.00648444842952145	0.07387308267915937
19.043	0.01487002407011584	0.06169469737248079	-0.014432252122460021	0.021236903669756835	0.03725217455420715	-0.04377315421205363	-0.006418175342275845	0.07684839333204696
19.042	0.03279367692698454	0.05833261603178652	-0.01656030051056856	0.022103426763586675	0.040630728959780704	-0.05000983916203694	-0.0031002884679924847	0.08729030900953294
19.041	0.0193583982723613	0.058885197798449695	-0.020498928843652564	0.02168394014744912	0.03979001168287066	-0.04009033890403124	-0.005209217386270559	0.07912828015344697
19.04	0.060428863516180265	0.06674574984427739	-0.023772253686810352	0.025371742352701787	0.048286599668173835	-0.05237277883525593	0.0063296392548553015	0.124687922859267
19.039	0.04805879794292167	0.07389389721355055	-0.024846430323153257	0.028234940255228658	0.04960929824690119	-0.05841489360390195	0.006841704121869796	0.11653560973154686
19.038	0.0482220949099581	0.08370549955329931	-0.025271913129328638	0.03336708390983123	0.050745075121990446	-0.06370833903738937	0.009160602356927505	0.12705950132836108
19.037	0.058924551569323746	0.08774248752302682	-0.02655188661727248	0.03480517039250586	0.0509298868054584	-0.055199389418469025	0.012590531771951241	0.15065082025457333
19.036	0.05189532601296598	0.09853121657074393	-0.023313527884223362	0.03703053713400006	0.04986219351003918	-0.055851215366597984	0.012569769585106805	0.1581545299769278
19.035	0.049259516880288956	0.09648584167835139	-0.020000283868548685	0.03762742043494427	0.04813918810793005	-0.05180934601646747	0.011393829870373295	0.1597023372164985
19.034	0.04326367369399975	0.08679527363921569	-0.016775469644444208	0.039917387821341244	0.04694785953683578	-0.0596876460478839	0.013200472262065333	0.14046107899906435
19.033	0.04031674442435573	0.0875190036402893	-0.014809325566345954	0.041595949681083155	0.045378694384690554	-0.05965339233627098	0.012482286633664685	0.1403476742278018
19.032	0.04726393600689427	0.07615614843958518	-0.015431624136695632	0.04341848769121359	0.04446423029623059	-0.06710233748327621	0.011326660467712024	0.1287688408139518
19.031	0.06307465248000899	0.07433549768908865	-0.014852856168223738	0.04696559728285088	0.045617352550435086	-0.07708654697040185	0.013899880740718906	0.138053696863758
19.03	0.08638623410122737	0.09457670535273621	-0.013624339652580808	0.0501911344404915	0.04850301870504303	-0.08928297294911491	0.017759877990750184	0.1767497799978024
19.029	0.08604061989494216	0.1017019123167584	-0.014312168449692741	0.05231240647507285	0.04572320901240001	-0.08712217692996038	0.014725939391609266	0.1843438023195203
19.028	0.09175292108470501	0.10776680959007034	-0.014138535433405153	0.05383349672171356	0.047784796885764536	-0.09235544192790002	0.013040126826196818	0.19464404692094828
19.027	0.08087965742533498	0.11765577916835301	-0.011978155150897507	0.05474839232849327	0.04515447993063404	-0.08844146362718064	0.009032359292788783	0.19801869007473716
19.026	0.10058831820789926	0.11273229409374697	-0.010193577914607843	0.057212000233565874	0.0473237110773832	-0.09612362116071704	0.010079014362059269	0.21153912453727042
19.025	0.09629482513005172	0.10863342007764754	-0.008091669031426107	0.06024662571507289	0.04936204015560275	-0.10246972777792696	0.012724835203918872	0.20397551426902183
19.024	0.08703094557832802	0.10728741361848737	-0.0070743456510919955	0.06160014062657293	0.05086968364150657	-0.10364619925055951	0.012449106368216611	0.19606763856324338
19.023	0.10392860784325464	0.10535150688565587	-0.006285534454166353	0.06197533013434242	0.05482835317359225	-0.11263406331406589	0.01507302927307741	0.20716420026861293
19.022	0.10394443028526457	0.11192505290297827	-0.00767131844588409	0.06415641033143515	0.056024134981505824	-0.11784995343225724	0.017605333975543758	0.2105287566230425
19.021	0.11331287922646816	0.11630441315741447	-0.009685550078739169	0.06446603826616393	0.054308861520577345	-0.1111586134654079	0.0234380473896163	0.22754802862647683
19.02	0.12072410277371404	0.12822504720017935	-0.009889714641674985	0.06534818054223468	0.057344948370245064	-0.11343598861069815	0.02867234171010935	0.248316575634
19.019	0.12790225776928033	0.10886672038051426	-0.009674917638363034	0.06416047305678596	0.05650803081487776	-0.10553578398432517	0.03049096614689617	0.2422267803987701
19.018	0.13141673324002845	0.11598139341564107	-0.011461352755839371	0.0648185759857931	0.057067184161926576	-0.10032622779512046	0.03563730128423437	0.25749630625242936
19.017	0.12365041168885771	0.1221046349100332	-0.013474070411079175	0.06574570957993675	0.05628189520796667	-0.10018138336536264	0.03394823979870498	0.2541271976103525
19.016	0.11659268247384791	0.1357797017236564	-0.016239270485010948	0.06658231879157483	0.05335402922911836	-0.10599322600785399	0.030476376120227577	0.25007623572533255
19.015	0.10339617428145065	0.13233892664395075	-0.021592416438605433	0.06717252807691843	0.05104077221663328	-0.10212896593995868	0.02513995486872922	0.23022701884038899
19.014	0.12117645269142763	0.13778309006143363	-0.027134148803932057	0.06967191524357652	0.05453949864973584	-0.10841329510660369	0.03113693744739443	0.24762351273563787
19.013	0.10314916143348007	0.13659231485254342	-0.029629798359162685	0.06888924479105274	0.05397003995367822	-0.10642964803222732	0.027592291717149386	0.22654131463936444
19.012	0.09990519555735844	0.14364104957649992	-0.030151922156020916	0.06894476085607426	0.05432083097605922	-0.10502963550737121	0.030121297025937466	0.23163027930259972
19.011	0.08009374769917965	0.14594182130200473	-0.026525954690799658	0.06835738852658313	0.05011953262155178	-0.10832332898373398	0.026166723711027018	0.20966320647478565
19.01	0.08263578928361781	0.14248133288328813	-0.019313127179760414	0.07006156137696706	0.0523322287294361	-0.1262912776668319	0.028320294933155132	0.20190650742671679
19.009	0.05611963967626732	0.14422086831501968	-0.01522729026997549	0.0712545041109296	0.050664420884639405	-0.12761440803234425	0.020184287192204664	0.17941773468453626
19.008	0.07038118156828155	0.13871269570379052	-0.011247373430315122	0.0722662274256205	0.05184474112134829	-0.13672836468773308	0.021288340141999207	0.18522910770099266
19.007	0.0661282999751478	0.14322183071478722	-0.010068764367044736	0.07110617365484817	0.052582739529614564	-0.1391646149321737	0.018673605271351867	0.18380566457517933
19.006	0.06091345334874898	0.14873353670996803	-0.005559448602129535	0.07326910662753683	0.05264357781180973	-0.14793735763520122	0.018194042633625784	0.1820628682607328
19.005	0.05456101557780624	0.14098891521854728	-0.007389264110189586	0.07316139608442196	0.05239531653446061	-0.15447607447508194	0.015903099853833425	0.15924130482996457
19.004	0.06798007756345648	0.13740316299236532	-0.006956325979021294	0.07493725331617274	0.05275670601289306	-0.16962875530661847	0.018360922013416214	0.15649211859924783
19.003	0.09820923352025979	0.1526327734691062	-0.006831481091131408	0.07660942197408627	0.05622060557841202	-0.1838546163597785	0.026757209730281062	0.19298593709095435
19.002	0.10965908609261188	0.15093134872319958	-0.007020818304001253	0.07634925471701504	0.05541570415175201	-0.1908424004514071	0.030170550890900927	0.19449217492917015
[truncated: 19,041 more rows]
